# Supplementary material for: The Effector Repertoire of the Hop Downy Mildew Pathogen Pseudoperonospora humuli
Source: Front Genet. 2020 Aug 11;11:910. doi: 10.3389/fgene.2020.00910 (PMC7432248; doi:10.3389/fgene.2020.00910)
Supplement: TABLE S4 — List of Pseudoperonospora cubensis predicted contaminant coding genes (CDSs) identified using BLASTN search against NCBI nr database. [file Table_4.XLSX]

## Sheet: Pcub_cds_contaminants_5849
Gene_IDs	Query_start (qstart)	Query_end (qend)	NCBI_description (stitle)	NCBI_taxid_full (staxids)	NCBI_taxid_level1 (staxids)	NCBI_taxid_level2 (staxids)	NCBI_taxid_level3 (staxids)	NCBI_taxid_level4 (staxids)	NCBI_taxid_level5 (staxids)	NCBI_gene_ID (seqid)	NCBI_description (stitle)	NCBI_tax_id (staxids)	NCBI_start (sstart)	NCBI_end_(send)	Alignment_length (length)	Coverage_HSP (qcovhsp)	Evalue (evalue)	% Identity (pident)
Pcub_MSU1_v1_00045_0_1_1	1	1296	Delftia acidovorans SPH-1	Bacteria|Proteobacteria|Betaproteobacteria|Burkholderiales|Comamonadaceae|Delftia|Delftia acidovorans|Delftia acidovorans SPH-1	Bacteria	Proteobacteria	Betaproteobacteria	Burkholderiales	Comamonadaceae	gi|160361034|gb|CP000884.1|	Delftia acidovorans SPH-1, complete genome	398578	1926368	1925073	1296	100	0	100
Pcub_MSU1_v1_00045_0_13_1	1	1629	Delftia acidovorans SPH-1	Bacteria|Proteobacteria|Betaproteobacteria|Burkholderiales|Comamonadaceae|Delftia|Delftia acidovorans|Delftia acidovorans SPH-1	Bacteria	Proteobacteria	Betaproteobacteria	Burkholderiales	Comamonadaceae	gi|160361034|gb|CP000884.1|	Delftia acidovorans SPH-1, complete genome	398578	1916144	1917772	1629	100	0	100
Pcub_MSU1_v1_00054_0_1_1	1	852	Acinetobacter oleivorans DR1	Bacteria|Proteobacteria|Gammaproteobacteria|Pseudomonadales|Moraxellaceae|Acinetobacter|Acinetobacter oleivorans|Acinetobacter oleivorans DR1	Bacteria	Proteobacteria	Gammaproteobacteria	Pseudomonadales	Moraxellaceae	gi|298698338|gb|CP002080.1|	Acinetobacter oleivorans DR1, complete genome	436717	50390	49539	852	100	0	93.66
Pcub_MSU1_v1_00054_0_2_1	1	846	Acinetobacter baumannii BJAB0715	Bacteria|Proteobacteria|Gammaproteobacteria|Pseudomonadales|Moraxellaceae|Acinetobacter|Acinetobacter calcoaceticus/baumannii complex|Acinetobacter baumannii|Acinetobacter baumannii BJAB0715	Bacteria	Proteobacteria	Gammaproteobacteria	Pseudomonadales	Moraxellaceae	gi|522368383|gb|CP003847.1|	Acinetobacter baumannii BJAB0715, complete genome	1096996	3974572	3975417	846	100	0	92.79
Pcub_MSU1_v1_00054_0_3_1	1	822	Acinetobacter calcoaceticus PHEA-2	Bacteria|Proteobacteria|Gammaproteobacteria|Pseudomonadales|Moraxellaceae|Acinetobacter|Acinetobacter calcoaceticus/baumannii complex|Acinetobacter calcoaceticus|Acinetobacter calcoaceticus PHEA-2	Bacteria	Proteobacteria	Gammaproteobacteria	Pseudomonadales	Moraxellaceae	gi|325121063|gb|CP002177.1|	Acinetobacter calcoaceticus PHEA-2, complete genome	871585	3125544	3124723	823	100	0	91.62
Pcub_MSU1_v1_00054_0_4_1	1	1113	Acinetobacter oleivorans DR1	Bacteria|Proteobacteria|Gammaproteobacteria|Pseudomonadales|Moraxellaceae|Acinetobacter|Acinetobacter oleivorans|Acinetobacter oleivorans DR1	Bacteria	Proteobacteria	Gammaproteobacteria	Pseudomonadales	Moraxellaceae	gi|298698338|gb|CP002080.1|	Acinetobacter oleivorans DR1, complete genome	436717	45863	46975	1113	100	0	96.14
Pcub_MSU1_v1_00054_0_5_1	1	1875	Acinetobacter oleivorans DR1	Bacteria|Proteobacteria|Gammaproteobacteria|Pseudomonadales|Moraxellaceae|Acinetobacter|Acinetobacter oleivorans|Acinetobacter oleivorans DR1	Bacteria	Proteobacteria	Gammaproteobacteria	Pseudomonadales	Moraxellaceae	gi|298698338|gb|CP002080.1|	Acinetobacter oleivorans DR1, complete genome	436717	30518	32392	1875	100	0	93.55
Pcub_MSU1_v1_00107_0_1_1	1	432	Acinetobacter calcoaceticus PHEA-2	Bacteria|Proteobacteria|Gammaproteobacteria|Pseudomonadales|Moraxellaceae|Acinetobacter|Acinetobacter calcoaceticus/baumannii complex|Acinetobacter calcoaceticus|Acinetobacter calcoaceticus PHEA-2	Bacteria	Proteobacteria	Gammaproteobacteria	Pseudomonadales	Moraxellaceae	gi|325121063|gb|CP002177.1|	Acinetobacter calcoaceticus PHEA-2, complete genome	871585	3664877	3665308	432	100	0	98.15
Pcub_MSU1_v1_00107_0_2_1	1	1131	Acinetobacter oleivorans DR1	Bacteria|Proteobacteria|Gammaproteobacteria|Pseudomonadales|Moraxellaceae|Acinetobacter|Acinetobacter oleivorans|Acinetobacter oleivorans DR1	Bacteria	Proteobacteria	Gammaproteobacteria	Pseudomonadales	Moraxellaceae	gi|298698338|gb|CP002080.1|	Acinetobacter oleivorans DR1, complete genome	436717	3605792	3604662	1131	100	0	95.05
Pcub_MSU1_v1_00107_0_3_1	1	1293	Acinetobacter oleivorans DR1	Bacteria|Proteobacteria|Gammaproteobacteria|Pseudomonadales|Moraxellaceae|Acinetobacter|Acinetobacter oleivorans|Acinetobacter oleivorans DR1	Bacteria	Proteobacteria	Gammaproteobacteria	Pseudomonadales	Moraxellaceae	gi|298698338|gb|CP002080.1|	Acinetobacter oleivorans DR1, complete genome	436717	3601930	3600638	1293	100	0	93.81
Pcub_MSU1_v1_00107_0_4_1	1	1146	Acinetobacter oleivorans DR1	Bacteria|Proteobacteria|Gammaproteobacteria|Pseudomonadales|Moraxellaceae|Acinetobacter|Acinetobacter oleivorans|Acinetobacter oleivorans DR1	Bacteria	Proteobacteria	Gammaproteobacteria	Pseudomonadales	Moraxellaceae	gi|298698338|gb|CP002080.1|	Acinetobacter oleivorans DR1, complete genome	436717	3599912	3598767	1146	100	0	96.16
Pcub_MSU1_v1_00115_0_2_1	1	228	Stenotrophomonas maltophilia	Bacteria|Proteobacteria|Gammaproteobacteria|Xanthomonadales|Xanthomonadaceae|Stenotrophomonas|Stenotrophomonas maltophilia group|Stenotrophomonas maltophilia	Bacteria	Proteobacteria	Gammaproteobacteria	Xanthomonadales	Xanthomonadaceae	gi|674291045|gb|CP008838.1|	Stenotrophomonas maltophilia strain 13637 genome	40324	1417644	1417417	228	100	2e-104	97.37
Pcub_MSU1_v1_00148_0_0_1	1	786	Acinetobacter oleivorans DR1	Bacteria|Proteobacteria|Gammaproteobacteria|Pseudomonadales|Moraxellaceae|Acinetobacter|Acinetobacter oleivorans|Acinetobacter oleivorans DR1	Bacteria	Proteobacteria	Gammaproteobacteria	Pseudomonadales	Moraxellaceae	gi|298698338|gb|CP002080.1|	Acinetobacter oleivorans DR1, complete genome	436717	3791194	3790409	786	100	0	97.46
Pcub_MSU1_v1_00170_0_3_1	1	999	Acinetobacter oleivorans DR1	Bacteria|Proteobacteria|Gammaproteobacteria|Pseudomonadales|Moraxellaceae|Acinetobacter|Acinetobacter oleivorans|Acinetobacter oleivorans DR1	Bacteria	Proteobacteria	Gammaproteobacteria	Pseudomonadales	Moraxellaceae	gi|298698338|gb|CP002080.1|	Acinetobacter oleivorans DR1, complete genome	436717	3934463	3933465	999	100	0	92.89
Pcub_MSU1_v1_00242_0_1_1	1	837	Acinetobacter calcoaceticus PHEA-2	Bacteria|Proteobacteria|Gammaproteobacteria|Pseudomonadales|Moraxellaceae|Acinetobacter|Acinetobacter calcoaceticus/baumannii complex|Acinetobacter calcoaceticus|Acinetobacter calcoaceticus PHEA-2	Bacteria	Proteobacteria	Gammaproteobacteria	Pseudomonadales	Moraxellaceae	gi|325121063|gb|CP002177.1|	Acinetobacter calcoaceticus PHEA-2, complete genome	871585	3247576	3248417	842	100	0	94.89
Pcub_MSU1_v1_00242_0_2_1	1	1440	Acinetobacter oleivorans DR1	Bacteria|Proteobacteria|Gammaproteobacteria|Pseudomonadales|Moraxellaceae|Acinetobacter|Acinetobacter oleivorans|Acinetobacter oleivorans DR1	Bacteria	Proteobacteria	Gammaproteobacteria	Pseudomonadales	Moraxellaceae	gi|298698338|gb|CP002080.1|	Acinetobacter oleivorans DR1, complete genome	436717	4016466	4015027	1440	100	0	92.57
Pcub_MSU1_v1_00242_0_3_1	1	1266	Acinetobacter oleivorans DR1	Bacteria|Proteobacteria|Gammaproteobacteria|Pseudomonadales|Moraxellaceae|Acinetobacter|Acinetobacter oleivorans|Acinetobacter oleivorans DR1	Bacteria	Proteobacteria	Gammaproteobacteria	Pseudomonadales	Moraxellaceae	gi|298698338|gb|CP002080.1|	Acinetobacter oleivorans DR1, complete genome	436717	4019387	4018122	1266	100	0	94.31
Pcub_MSU1_v1_00260_0_0_1	1	579	Stenotrophomonas maltophilia JV3	Bacteria|Proteobacteria|Gammaproteobacteria|Xanthomonadales|Xanthomonadaceae|Stenotrophomonas|Stenotrophomonas maltophilia group|Stenotrophomonas maltophilia|Stenotrophomonas maltophilia JV3	Bacteria	Proteobacteria	Gammaproteobacteria	Xanthomonadales	Xanthomonadaceae	gi|343776783|gb|CP002986.1|	Stenotrophomonas maltophilia JV3, complete genome	868597	1631511	1630933	580	100	0	92.07
Pcub_MSU1_v1_00270_0_0_1	1	732	Acinetobacter oleivorans DR1	Bacteria|Proteobacteria|Gammaproteobacteria|Pseudomonadales|Moraxellaceae|Acinetobacter|Acinetobacter oleivorans|Acinetobacter oleivorans DR1	Bacteria	Proteobacteria	Gammaproteobacteria	Pseudomonadales	Moraxellaceae	gi|298698338|gb|CP002080.1|	Acinetobacter oleivorans DR1, complete genome	436717	2504589	2503858	732	100	0	91.67
Pcub_MSU1_v1_00284_0_0_1	1	2187	Acinetobacter oleivorans DR1	Bacteria|Proteobacteria|Gammaproteobacteria|Pseudomonadales|Moraxellaceae|Acinetobacter|Acinetobacter oleivorans|Acinetobacter oleivorans DR1	Bacteria	Proteobacteria	Gammaproteobacteria	Pseudomonadales	Moraxellaceae	gi|298698338|gb|CP002080.1|	Acinetobacter oleivorans DR1, complete genome	436717	289245	291431	2187	100	0	90.21
Pcub_MSU1_v1_00284_0_1_1	1	1641	Acinetobacter oleivorans DR1	Bacteria|Proteobacteria|Gammaproteobacteria|Pseudomonadales|Moraxellaceae|Acinetobacter|Acinetobacter oleivorans|Acinetobacter oleivorans DR1	Bacteria	Proteobacteria	Gammaproteobacteria	Pseudomonadales	Moraxellaceae	gi|298698338|gb|CP002080.1|	Acinetobacter oleivorans DR1, complete genome	436717	296357	297997	1641	100	0	95.73
Pcub_MSU1_v1_00298_0_1_1	1	2367	Acinetobacter oleivorans DR1	Bacteria|Proteobacteria|Gammaproteobacteria|Pseudomonadales|Moraxellaceae|Acinetobacter|Acinetobacter oleivorans|Acinetobacter oleivorans DR1	Bacteria	Proteobacteria	Gammaproteobacteria	Pseudomonadales	Moraxellaceae	gi|298698338|gb|CP002080.1|	Acinetobacter oleivorans DR1, complete genome	436717	3670013	3667647	2367	100	0	93.79
Pcub_MSU1_v1_00298_0_2_1	1	1554	Acinetobacter oleivorans DR1	Bacteria|Proteobacteria|Gammaproteobacteria|Pseudomonadales|Moraxellaceae|Acinetobacter|Acinetobacter oleivorans|Acinetobacter oleivorans DR1	Bacteria	Proteobacteria	Gammaproteobacteria	Pseudomonadales	Moraxellaceae	gi|298698338|gb|CP002080.1|	Acinetobacter oleivorans DR1, complete genome	436717	3672737	3674290	1554	100	0	92.6
Pcub_MSU1_v1_00298_0_4_1	1	1416	Acinetobacter oleivorans DR1	Bacteria|Proteobacteria|Gammaproteobacteria|Pseudomonadales|Moraxellaceae|Acinetobacter|Acinetobacter oleivorans|Acinetobacter oleivorans DR1	Bacteria	Proteobacteria	Gammaproteobacteria	Pseudomonadales	Moraxellaceae	gi|298698338|gb|CP002080.1|	Acinetobacter oleivorans DR1, complete genome	436717	3660551	3661973	1423	100	0	93.68
Pcub_MSU1_v1_00298_0_6_1	1	1449	Acinetobacter oleivorans DR1	Bacteria|Proteobacteria|Gammaproteobacteria|Pseudomonadales|Moraxellaceae|Acinetobacter|Acinetobacter oleivorans|Acinetobacter oleivorans DR1	Bacteria	Proteobacteria	Gammaproteobacteria	Pseudomonadales	Moraxellaceae	gi|298698338|gb|CP002080.1|	Acinetobacter oleivorans DR1, complete genome	436717	3658419	3659867	1449	100	0	95.51
Pcub_MSU1_v1_00308_0_0_1	1	1182	Delftia acidovorans SPH-1	Bacteria|Proteobacteria|Betaproteobacteria|Burkholderiales|Comamonadaceae|Delftia|Delftia acidovorans|Delftia acidovorans SPH-1	Bacteria	Proteobacteria	Betaproteobacteria	Burkholderiales	Comamonadaceae	gi|160361034|gb|CP000884.1|	Delftia acidovorans SPH-1, complete genome	398578	6231987	6233168	1182	100	0	96.79
Pcub_MSU1_v1_00308_0_2_1	1	294	Delftia sp. Cs1-4	Bacteria|Proteobacteria|Betaproteobacteria|Burkholderiales|Comamonadaceae|Delftia|Delftia sp. Cs1-4	Bacteria	Proteobacteria	Betaproteobacteria	Burkholderiales	Comamonadaceae	gi|333741867|gb|CP002735.1|	Delftia sp. Cs1-4, complete genome	742013	1135968	1135684	294	100	3e-108	91.84
Pcub_MSU1_v1_00311_0_3_1	1	1395	Acinetobacter oleivorans DR1	Bacteria|Proteobacteria|Gammaproteobacteria|Pseudomonadales|Moraxellaceae|Acinetobacter|Acinetobacter oleivorans|Acinetobacter oleivorans DR1	Bacteria	Proteobacteria	Gammaproteobacteria	Pseudomonadales	Moraxellaceae	gi|298698338|gb|CP002080.1|	Acinetobacter oleivorans DR1, complete genome	436717	3341400	3340006	1395	100	0	96.99
Pcub_MSU1_v1_00317_0_1_1	1	948	Acinetobacter oleivorans DR1	Bacteria|Proteobacteria|Gammaproteobacteria|Pseudomonadales|Moraxellaceae|Acinetobacter|Acinetobacter oleivorans|Acinetobacter oleivorans DR1	Bacteria	Proteobacteria	Gammaproteobacteria	Pseudomonadales	Moraxellaceae	gi|298698338|gb|CP002080.1|	Acinetobacter oleivorans DR1, complete genome	436717	3768357	3769304	948	100	0	93.78
Pcub_MSU1_v1_00320_0_2_1	1	489	Acinetobacter oleivorans DR1	Bacteria|Proteobacteria|Gammaproteobacteria|Pseudomonadales|Moraxellaceae|Acinetobacter|Acinetobacter oleivorans|Acinetobacter oleivorans DR1	Bacteria	Proteobacteria	Gammaproteobacteria	Pseudomonadales	Moraxellaceae	gi|298698338|gb|CP002080.1|	Acinetobacter oleivorans DR1, complete genome	436717	3520305	3519817	489	100	0	95.5
Pcub_MSU1_v1_00320_0_3_1	1	2463	Acinetobacter oleivorans DR1	Bacteria|Proteobacteria|Gammaproteobacteria|Pseudomonadales|Moraxellaceae|Acinetobacter|Acinetobacter oleivorans|Acinetobacter oleivorans DR1	Bacteria	Proteobacteria	Gammaproteobacteria	Pseudomonadales	Moraxellaceae	gi|298698338|gb|CP002080.1|	Acinetobacter oleivorans DR1, complete genome	436717	3516056	3513577	2482	100	0	95.81
Pcub_MSU1_v1_00320_0_4_1	1	621	Acinetobacter oleivorans DR1	Bacteria|Proteobacteria|Gammaproteobacteria|Pseudomonadales|Moraxellaceae|Acinetobacter|Acinetobacter oleivorans|Acinetobacter oleivorans DR1	Bacteria	Proteobacteria	Gammaproteobacteria	Pseudomonadales	Moraxellaceae	gi|298698338|gb|CP002080.1|	Acinetobacter oleivorans DR1, complete genome	436717	3513347	3512727	621	100	0	91.95
Pcub_MSU1_v1_00320_0_5_1	1	360	Acinetobacter oleivorans DR1	Bacteria|Proteobacteria|Gammaproteobacteria|Pseudomonadales|Moraxellaceae|Acinetobacter|Acinetobacter oleivorans|Acinetobacter oleivorans DR1	Bacteria	Proteobacteria	Gammaproteobacteria	Pseudomonadales	Moraxellaceae	gi|298698338|gb|CP002080.1|	Acinetobacter oleivorans DR1, complete genome	436717	3510501	3510142	360	100	0	100
Pcub_MSU1_v1_00320_0_7_1	1	843	Acinetobacter oleivorans DR1	Bacteria|Proteobacteria|Gammaproteobacteria|Pseudomonadales|Moraxellaceae|Acinetobacter|Acinetobacter oleivorans|Acinetobacter oleivorans DR1	Bacteria	Proteobacteria	Gammaproteobacteria	Pseudomonadales	Moraxellaceae	gi|298698338|gb|CP002080.1|	Acinetobacter oleivorans DR1, complete genome	436717	3507638	3506796	843	100	0	95.97
Pcub_MSU1_v1_00324_0_1_1	1	3231	Acinetobacter oleivorans DR1	Bacteria|Proteobacteria|Gammaproteobacteria|Pseudomonadales|Moraxellaceae|Acinetobacter|Acinetobacter oleivorans|Acinetobacter oleivorans DR1	Bacteria	Proteobacteria	Gammaproteobacteria	Pseudomonadales	Moraxellaceae	gi|298698338|gb|CP002080.1|	Acinetobacter oleivorans DR1, complete genome	436717	830160	826930	3231	100	0	96.9
Pcub_MSU1_v1_00324_0_2_1	1	831	Acinetobacter oleivorans DR1	Bacteria|Proteobacteria|Gammaproteobacteria|Pseudomonadales|Moraxellaceae|Acinetobacter|Acinetobacter oleivorans|Acinetobacter oleivorans DR1	Bacteria	Proteobacteria	Gammaproteobacteria	Pseudomonadales	Moraxellaceae	gi|298698338|gb|CP002080.1|	Acinetobacter oleivorans DR1, complete genome	436717	840369	841199	831	100	0	93.26
Pcub_MSU1_v1_00324_0_5_1	1	1929	Acinetobacter oleivorans DR1	Bacteria|Proteobacteria|Gammaproteobacteria|Pseudomonadales|Moraxellaceae|Acinetobacter|Acinetobacter oleivorans|Acinetobacter oleivorans DR1	Bacteria	Proteobacteria	Gammaproteobacteria	Pseudomonadales	Moraxellaceae	gi|298698338|gb|CP002080.1|	Acinetobacter oleivorans DR1, complete genome	436717	834100	836028	1929	100	0	96.89
Pcub_MSU1_v1_00324_0_6_1	1	651	Acinetobacter calcoaceticus PHEA-2	Bacteria|Proteobacteria|Gammaproteobacteria|Pseudomonadales|Moraxellaceae|Acinetobacter|Acinetobacter calcoaceticus/baumannii complex|Acinetobacter calcoaceticus|Acinetobacter calcoaceticus PHEA-2	Bacteria	Proteobacteria	Gammaproteobacteria	Pseudomonadales	Moraxellaceae	gi|325121063|gb|CP002177.1|	Acinetobacter calcoaceticus PHEA-2, complete genome	871585	2303524	2302874	651	100	0	95.08
Pcub_MSU1_v1_00329_0_0_1	1	987	Acinetobacter oleivorans DR1	Bacteria|Proteobacteria|Gammaproteobacteria|Pseudomonadales|Moraxellaceae|Acinetobacter|Acinetobacter oleivorans|Acinetobacter oleivorans DR1	Bacteria	Proteobacteria	Gammaproteobacteria	Pseudomonadales	Moraxellaceae	gi|298698338|gb|CP002080.1|	Acinetobacter oleivorans DR1, complete genome	436717	499829	500815	987	100	0	98.68
Pcub_MSU1_v1_00331_0_0_1	1	873	Acinetobacter calcoaceticus PHEA-2	Bacteria|Proteobacteria|Gammaproteobacteria|Pseudomonadales|Moraxellaceae|Acinetobacter|Acinetobacter calcoaceticus/baumannii complex|Acinetobacter calcoaceticus|Acinetobacter calcoaceticus PHEA-2	Bacteria	Proteobacteria	Gammaproteobacteria	Pseudomonadales	Moraxellaceae	gi|325121063|gb|CP002177.1|	Acinetobacter calcoaceticus PHEA-2, complete genome	871585	2938778	2937906	873	100	0	92.33
Pcub_MSU1_v1_00331_0_2_1	1	1443	Acinetobacter oleivorans DR1	Bacteria|Proteobacteria|Gammaproteobacteria|Pseudomonadales|Moraxellaceae|Acinetobacter|Acinetobacter oleivorans|Acinetobacter oleivorans DR1	Bacteria	Proteobacteria	Gammaproteobacteria	Pseudomonadales	Moraxellaceae	gi|298698338|gb|CP002080.1|	Acinetobacter oleivorans DR1, complete genome	436717	222554	223996	1443	100	0	92.03
Pcub_MSU1_v1_00341_0_0_1	1	759	Acinetobacter baumannii	Bacteria|Proteobacteria|Gammaproteobacteria|Pseudomonadales|Moraxellaceae|Acinetobacter|Acinetobacter calcoaceticus/baumannii complex|Acinetobacter baumannii	Bacteria	Proteobacteria	Gammaproteobacteria	Pseudomonadales	Moraxellaceae	gi|742999896|gb|CP010397.1|	Acinetobacter baumannii strain 6200, complete genome	470	256836	256078	759	100	0	95.52
Pcub_MSU1_v1_00341_0_1_1	1	690	Acinetobacter oleivorans DR1	Bacteria|Proteobacteria|Gammaproteobacteria|Pseudomonadales|Moraxellaceae|Acinetobacter|Acinetobacter oleivorans|Acinetobacter oleivorans DR1	Bacteria	Proteobacteria	Gammaproteobacteria	Pseudomonadales	Moraxellaceae	gi|298698338|gb|CP002080.1|	Acinetobacter oleivorans DR1, complete genome	436717	268278	267589	690	100	0	95.07
Pcub_MSU1_v1_00356_0_0_1	1	1473	Delftia sp. Cs1-4	Bacteria|Proteobacteria|Betaproteobacteria|Burkholderiales|Comamonadaceae|Delftia|Delftia sp. Cs1-4	Bacteria	Proteobacteria	Betaproteobacteria	Burkholderiales	Comamonadaceae	gi|333741867|gb|CP002735.1|	Delftia sp. Cs1-4, complete genome	742013	2182619	2181147	1473	100	0	91.31
Pcub_MSU1_v1_00356_0_4_1	1	1800	Delftia sp. Cs1-4	Bacteria|Proteobacteria|Betaproteobacteria|Burkholderiales|Comamonadaceae|Delftia|Delftia sp. Cs1-4	Bacteria	Proteobacteria	Betaproteobacteria	Burkholderiales	Comamonadaceae	gi|333741867|gb|CP002735.1|	Delftia sp. Cs1-4, complete genome	742013	2177256	2175457	1800	100	0	94.5
Pcub_MSU1_v1_00356_0_5_1	1	795	Culex quinquefasciatus	Eukaryota|Opisthokonta|Metazoa|Eumetazoa|Bilateria|Protostomia|Ecdysozoa|Panarthropoda|Arthropoda|Mandibulata|Pancrustacea|Hexapoda|Insecta|Dicondylia|Pterygota|Neoptera|Endopterygota|Diptera|Nematocera|Culicomorpha|Culicoidea|Culicidae|Culicinae|Culicini|Culex|Culex|Culex pipiens complex|Culex quinquefasciatus	Eukaryota	Opisthokonta	Metazoa	Eumetazoa	Bilateria	gi|78190082|gb|AC168047.3|	Culex pipiens quinquefasciatus, clone Culex pipiens quinquefasciatus-3940115D9, complete sequence	7176	55990	55196	795	100	0	96.86
Pcub_MSU1_v1_00356_0_7_1	1	1041	Delftia acidovorans SPH-1	Bacteria|Proteobacteria|Betaproteobacteria|Burkholderiales|Comamonadaceae|Delftia|Delftia acidovorans|Delftia acidovorans SPH-1	Bacteria	Proteobacteria	Betaproteobacteria	Burkholderiales	Comamonadaceae	gi|160361034|gb|CP000884.1|	Delftia acidovorans SPH-1, complete genome	398578	5435017	5433977	1041	100	0	95
Pcub_MSU1_v1_00369_0_2_1	1	903	Acinetobacter oleivorans DR1	Bacteria|Proteobacteria|Gammaproteobacteria|Pseudomonadales|Moraxellaceae|Acinetobacter|Acinetobacter oleivorans|Acinetobacter oleivorans DR1	Bacteria	Proteobacteria	Gammaproteobacteria	Pseudomonadales	Moraxellaceae	gi|298698338|gb|CP002080.1|	Acinetobacter oleivorans DR1, complete genome	436717	164586	165488	903	100	0	96.23
Pcub_MSU1_v1_00378_0_2_1	1	1314	Acinetobacter oleivorans DR1	Bacteria|Proteobacteria|Gammaproteobacteria|Pseudomonadales|Moraxellaceae|Acinetobacter|Acinetobacter oleivorans|Acinetobacter oleivorans DR1	Bacteria	Proteobacteria	Gammaproteobacteria	Pseudomonadales	Moraxellaceae	gi|298698338|gb|CP002080.1|	Acinetobacter oleivorans DR1, complete genome	436717	3880138	3881451	1314	100	0	94.52
Pcub_MSU1_v1_00398_0_0_1	1	387	Cucumis hystrix	Eukaryota|Viridiplantae|Streptophyta|Streptophytina|Embryophyta|Tracheophyta|Euphyllophyta|Spermatophyta|Magnoliophyta|Mesangiospermae|eudicotyledons|Gunneridae|Pentapetalae|rosids|fabids|Cucurbitales|Cucurbitaceae|Benincaseae|Cucumis|Cucumis hystrix	Eukaryota	Viridiplantae	Streptophyta	Streptophytina	Embryophyta	gi|586598666|gb|KF957866.1|	Cucumis hystrix plastid, complete genome	396994	98011	97625	387	100	0	100
Pcub_MSU1_v1_00401_0_0_1	1	1713	Acinetobacter oleivorans DR1	Bacteria|Proteobacteria|Gammaproteobacteria|Pseudomonadales|Moraxellaceae|Acinetobacter|Acinetobacter oleivorans|Acinetobacter oleivorans DR1	Bacteria	Proteobacteria	Gammaproteobacteria	Pseudomonadales	Moraxellaceae	gi|298698338|gb|CP002080.1|	Acinetobacter oleivorans DR1, complete genome	436717	3733798	3735510	1713	100	0	94.34
Pcub_MSU1_v1_00405_0_8_1	1	1179	Delftia sp. Cs1-4	Bacteria|Proteobacteria|Betaproteobacteria|Burkholderiales|Comamonadaceae|Delftia|Delftia sp. Cs1-4	Bacteria	Proteobacteria	Betaproteobacteria	Burkholderiales	Comamonadaceae	gi|333741867|gb|CP002735.1|	Delftia sp. Cs1-4, complete genome	742013	1187098	1188276	1179	100	0	95.84
Pcub_MSU1_v1_00413_0_1_1	1	1014	Delftia sp. Cs1-4	Bacteria|Proteobacteria|Betaproteobacteria|Burkholderiales|Comamonadaceae|Delftia|Delftia sp. Cs1-4	Bacteria	Proteobacteria	Betaproteobacteria	Burkholderiales	Comamonadaceae	gi|333741867|gb|CP002735.1|	Delftia sp. Cs1-4, complete genome	742013	1321889	1322902	1014	100	0	95.27
Pcub_MSU1_v1_00413_0_4_1	1	1803	Delftia acidovorans SPH-1	Bacteria|Proteobacteria|Betaproteobacteria|Burkholderiales|Comamonadaceae|Delftia|Delftia acidovorans|Delftia acidovorans SPH-1	Bacteria	Proteobacteria	Betaproteobacteria	Burkholderiales	Comamonadaceae	gi|160361034|gb|CP000884.1|	Delftia acidovorans SPH-1, complete genome	398578	6053365	6051563	1803	100	0	97.62
Pcub_MSU1_v1_00413_0_5_1	1	732	Pantholops hodgsonii	Eukaryota|Opisthokonta|Metazoa|Eumetazoa|Bilateria|Deuterostomia|Chordata|Craniata|Vertebrata|Gnathostomata|Teleostomi|Euteleostomi|Sarcopterygii|Dipnotetrapodomorpha|Tetrapoda|Amniota|Mammalia|Theria|Eutheria|Boreoeutheria|Laurasiatheria|Cetartiodactyla|Ruminantia|Pecora|Bovidae|Antilopinae|Pantholops|Pantholops hodgsonii	Eukaryota	Opisthokonta	Metazoa	Eumetazoa	Bilateria	gi|556761823|ref|XM_005976154.1|	PREDICTED: Pantholops hodgsonii GTP cyclohydrolase 1-like (LOC102336515), mRNA	59538	1	732	732	100	0	99.59
Pcub_MSU1_v1_00420_0_1_1	1	1245	Stenotrophomonas maltophilia JV3	Bacteria|Proteobacteria|Gammaproteobacteria|Xanthomonadales|Xanthomonadaceae|Stenotrophomonas|Stenotrophomonas maltophilia group|Stenotrophomonas maltophilia|Stenotrophomonas maltophilia JV3	Bacteria	Proteobacteria	Gammaproteobacteria	Xanthomonadales	Xanthomonadaceae	gi|343776783|gb|CP002986.1|	Stenotrophomonas maltophilia JV3, complete genome	868597	576790	578034	1246	100	0	94.86
Pcub_MSU1_v1_00440_0_4_1	1	2811	Delftia sp. Cs1-4	Bacteria|Proteobacteria|Betaproteobacteria|Burkholderiales|Comamonadaceae|Delftia|Delftia sp. Cs1-4	Bacteria	Proteobacteria	Betaproteobacteria	Burkholderiales	Comamonadaceae	gi|333741867|gb|CP002735.1|	Delftia sp. Cs1-4, complete genome	742013	745124	742308	2818	100	0	96.1
Pcub_MSU1_v1_00444_0_2_1	1	3687	Acinetobacter oleivorans DR1	Bacteria|Proteobacteria|Gammaproteobacteria|Pseudomonadales|Moraxellaceae|Acinetobacter|Acinetobacter oleivorans|Acinetobacter oleivorans DR1	Bacteria	Proteobacteria	Gammaproteobacteria	Pseudomonadales	Moraxellaceae	gi|298698338|gb|CP002080.1|	Acinetobacter oleivorans DR1, complete genome	436717	3094713	3098399	3689	100	0	92.87
Pcub_MSU1_v1_00444_0_3_1	1	1005	Acinetobacter baumannii	Bacteria|Proteobacteria|Gammaproteobacteria|Pseudomonadales|Moraxellaceae|Acinetobacter|Acinetobacter calcoaceticus/baumannii complex|Acinetobacter baumannii	Bacteria	Proteobacteria	Gammaproteobacteria	Pseudomonadales	Moraxellaceae	gi|902756494|emb|LN868200.1|	Acinetobacter baumannii genome assembly R2090, chromosome : I	470	2766871	2765867	1005	100	0	93.93
Pcub_MSU1_v1_00444_0_4_1	1	1302	Acinetobacter baumannii	Bacteria|Proteobacteria|Gammaproteobacteria|Pseudomonadales|Moraxellaceae|Acinetobacter|Acinetobacter calcoaceticus/baumannii complex|Acinetobacter baumannii	Bacteria	Proteobacteria	Gammaproteobacteria	Pseudomonadales	Moraxellaceae	gi|827403829|gb|CP010779.1|	Acinetobacter baumannii strain XH386, complete genome	470	2957075	2955774	1302	100	0	90.94
Pcub_MSU1_v1_00444_0_5_1	1	846	Acinetobacter oleivorans DR1	Bacteria|Proteobacteria|Gammaproteobacteria|Pseudomonadales|Moraxellaceae|Acinetobacter|Acinetobacter oleivorans|Acinetobacter oleivorans DR1	Bacteria	Proteobacteria	Gammaproteobacteria	Pseudomonadales	Moraxellaceae	gi|298698338|gb|CP002080.1|	Acinetobacter oleivorans DR1, complete genome	436717	3102092	3101247	846	100	0	93.03
Pcub_MSU1_v1_00444_0_6_1	1	750	Acinetobacter baumannii	Bacteria|Proteobacteria|Gammaproteobacteria|Pseudomonadales|Moraxellaceae|Acinetobacter|Acinetobacter calcoaceticus/baumannii complex|Acinetobacter baumannii	Bacteria	Proteobacteria	Gammaproteobacteria	Pseudomonadales	Moraxellaceae	gi|846382486|emb|LN865143.1|	Acinetobacter baumannii genome assembly CIP70.10, chromosome : I	470	1013527	1014276	750	100	0	92
Pcub_MSU1_v1_00454_0_1_1	1	1083	Acinetobacter oleivorans DR1	Bacteria|Proteobacteria|Gammaproteobacteria|Pseudomonadales|Moraxellaceae|Acinetobacter|Acinetobacter oleivorans|Acinetobacter oleivorans DR1	Bacteria	Proteobacteria	Gammaproteobacteria	Pseudomonadales	Moraxellaceae	gi|298698338|gb|CP002080.1|	Acinetobacter oleivorans DR1, complete genome	436717	333689	334771	1083	100	0	93.63
Pcub_MSU1_v1_00454_0_2_1	1	570	Acinetobacter oleivorans DR1	Bacteria|Proteobacteria|Gammaproteobacteria|Pseudomonadales|Moraxellaceae|Acinetobacter|Acinetobacter oleivorans|Acinetobacter oleivorans DR1	Bacteria	Proteobacteria	Gammaproteobacteria	Pseudomonadales	Moraxellaceae	gi|298698338|gb|CP002080.1|	Acinetobacter oleivorans DR1, complete genome	436717	333091	333660	570	100	0	92.81
Pcub_MSU1_v1_00461_0_0_1	1	1716	Acinetobacter oleivorans DR1	Bacteria|Proteobacteria|Gammaproteobacteria|Pseudomonadales|Moraxellaceae|Acinetobacter|Acinetobacter oleivorans|Acinetobacter oleivorans DR1	Bacteria	Proteobacteria	Gammaproteobacteria	Pseudomonadales	Moraxellaceae	gi|298698338|gb|CP002080.1|	Acinetobacter oleivorans DR1, complete genome	436717	666861	665146	1716	100	0	94.46
Pcub_MSU1_v1_00477_0_1_1	1	1143	Acinetobacter oleivorans DR1	Bacteria|Proteobacteria|Gammaproteobacteria|Pseudomonadales|Moraxellaceae|Acinetobacter|Acinetobacter oleivorans|Acinetobacter oleivorans DR1	Bacteria	Proteobacteria	Gammaproteobacteria	Pseudomonadales	Moraxellaceae	gi|298698338|gb|CP002080.1|	Acinetobacter oleivorans DR1, complete genome	436717	866925	865783	1143	100	0	92.56
Pcub_MSU1_v1_00477_0_2_1	1	906	Acinetobacter oleivorans DR1	Bacteria|Proteobacteria|Gammaproteobacteria|Pseudomonadales|Moraxellaceae|Acinetobacter|Acinetobacter oleivorans|Acinetobacter oleivorans DR1	Bacteria	Proteobacteria	Gammaproteobacteria	Pseudomonadales	Moraxellaceae	gi|298698338|gb|CP002080.1|	Acinetobacter oleivorans DR1, complete genome	436717	873500	874405	906	100	0	95.58
Pcub_MSU1_v1_00477_0_4_1	1	291	Acinetobacter oleivorans DR1	Bacteria|Proteobacteria|Gammaproteobacteria|Pseudomonadales|Moraxellaceae|Acinetobacter|Acinetobacter oleivorans|Acinetobacter oleivorans DR1	Bacteria	Proteobacteria	Gammaproteobacteria	Pseudomonadales	Moraxellaceae	gi|298698338|gb|CP002080.1|	Acinetobacter oleivorans DR1, complete genome	436717	862140	862430	291	100	5e-141	98.28
Pcub_MSU1_v1_00487_0_1_1	1	852	Acinetobacter oleivorans DR1	Bacteria|Proteobacteria|Gammaproteobacteria|Pseudomonadales|Moraxellaceae|Acinetobacter|Acinetobacter oleivorans|Acinetobacter oleivorans DR1	Bacteria	Proteobacteria	Gammaproteobacteria	Pseudomonadales	Moraxellaceae	gi|298698338|gb|CP002080.1|	Acinetobacter oleivorans DR1, complete genome	436717	3277327	3278176	852	100	0	96.6
Pcub_MSU1_v1_00487_0_2_1	1	1191	Acinetobacter oleivorans DR1	Bacteria|Proteobacteria|Gammaproteobacteria|Pseudomonadales|Moraxellaceae|Acinetobacter|Acinetobacter oleivorans|Acinetobacter oleivorans DR1	Bacteria	Proteobacteria	Gammaproteobacteria	Pseudomonadales	Moraxellaceae	gi|298698338|gb|CP002080.1|	Acinetobacter oleivorans DR1, complete genome	436717	3845835	3844645	1194	100	0	96.06
Pcub_MSU1_v1_00487_0_3_1	1	2139	Acinetobacter oleivorans DR1	Bacteria|Proteobacteria|Gammaproteobacteria|Pseudomonadales|Moraxellaceae|Acinetobacter|Acinetobacter oleivorans|Acinetobacter oleivorans DR1	Bacteria	Proteobacteria	Gammaproteobacteria	Pseudomonadales	Moraxellaceae	gi|298698338|gb|CP002080.1|	Acinetobacter oleivorans DR1, complete genome	436717	3273944	3271806	2139	100	0	97.29
Pcub_MSU1_v1_00490_0_2_1	1	1017	Acinetobacter oleivorans DR1	Bacteria|Proteobacteria|Gammaproteobacteria|Pseudomonadales|Moraxellaceae|Acinetobacter|Acinetobacter oleivorans|Acinetobacter oleivorans DR1	Bacteria	Proteobacteria	Gammaproteobacteria	Pseudomonadales	Moraxellaceae	gi|298698338|gb|CP002080.1|	Acinetobacter oleivorans DR1, complete genome	436717	3562362	3561346	1017	100	0	97.05
Pcub_MSU1_v1_00490_0_3_1	1	2625	Acinetobacter oleivorans DR1	Bacteria|Proteobacteria|Gammaproteobacteria|Pseudomonadales|Moraxellaceae|Acinetobacter|Acinetobacter oleivorans|Acinetobacter oleivorans DR1	Bacteria	Proteobacteria	Gammaproteobacteria	Pseudomonadales	Moraxellaceae	gi|298698338|gb|CP002080.1|	Acinetobacter oleivorans DR1, complete genome	436717	3565651	3568275	2625	100	0	95.12
Pcub_MSU1_v1_00501_0_1_1	1	1356	Acinetobacter oleivorans DR1	Bacteria|Proteobacteria|Gammaproteobacteria|Pseudomonadales|Moraxellaceae|Acinetobacter|Acinetobacter oleivorans|Acinetobacter oleivorans DR1	Bacteria	Proteobacteria	Gammaproteobacteria	Pseudomonadales	Moraxellaceae	gi|298698338|gb|CP002080.1|	Acinetobacter oleivorans DR1, complete genome	436717	4149441	4148086	1356	100	0	92.92
Pcub_MSU1_v1_00501_0_5_1	1	507	Acinetobacter oleivorans DR1	Bacteria|Proteobacteria|Gammaproteobacteria|Pseudomonadales|Moraxellaceae|Acinetobacter|Acinetobacter oleivorans|Acinetobacter oleivorans DR1	Bacteria	Proteobacteria	Gammaproteobacteria	Pseudomonadales	Moraxellaceae	gi|298698338|gb|CP002080.1|	Acinetobacter oleivorans DR1, complete genome	436717	4144973	4145479	507	100	0	95.07
Pcub_MSU1_v1_00504_0_1_1	1	2430	Acinetobacter oleivorans DR1	Bacteria|Proteobacteria|Gammaproteobacteria|Pseudomonadales|Moraxellaceae|Acinetobacter|Acinetobacter oleivorans|Acinetobacter oleivorans DR1	Bacteria	Proteobacteria	Gammaproteobacteria	Pseudomonadales	Moraxellaceae	gi|298698338|gb|CP002080.1|	Acinetobacter oleivorans DR1, complete genome	436717	3024493	3022056	2439	100	0	91.92
Pcub_MSU1_v1_00508_0_0_1	1	933	Acinetobacter oleivorans DR1	Bacteria|Proteobacteria|Gammaproteobacteria|Pseudomonadales|Moraxellaceae|Acinetobacter|Acinetobacter oleivorans|Acinetobacter oleivorans DR1	Bacteria	Proteobacteria	Gammaproteobacteria	Pseudomonadales	Moraxellaceae	gi|298698338|gb|CP002080.1|	Acinetobacter oleivorans DR1, complete genome	436717	3531206	3530274	933	100	0	96.36
Pcub_MSU1_v1_00508_0_2_1	1	789	Acinetobacter oleivorans DR1	Bacteria|Proteobacteria|Gammaproteobacteria|Pseudomonadales|Moraxellaceae|Acinetobacter|Acinetobacter oleivorans|Acinetobacter oleivorans DR1	Bacteria	Proteobacteria	Gammaproteobacteria	Pseudomonadales	Moraxellaceae	gi|298698338|gb|CP002080.1|	Acinetobacter oleivorans DR1, complete genome	436717	3534281	3535069	789	100	0	95.06
Pcub_MSU1_v1_00508_0_3_1	1	2058	Acinetobacter oleivorans DR1	Bacteria|Proteobacteria|Gammaproteobacteria|Pseudomonadales|Moraxellaceae|Acinetobacter|Acinetobacter oleivorans|Acinetobacter oleivorans DR1	Bacteria	Proteobacteria	Gammaproteobacteria	Pseudomonadales	Moraxellaceae	gi|298698338|gb|CP002080.1|	Acinetobacter oleivorans DR1, complete genome	436717	3532127	3534184	2058	100	0	92.52
Pcub_MSU1_v1_00514_0_1_1	1	312	Acinetobacter oleivorans DR1	Bacteria|Proteobacteria|Gammaproteobacteria|Pseudomonadales|Moraxellaceae|Acinetobacter|Acinetobacter oleivorans|Acinetobacter oleivorans DR1	Bacteria	Proteobacteria	Gammaproteobacteria	Pseudomonadales	Moraxellaceae	gi|298698338|gb|CP002080.1|	Acinetobacter oleivorans DR1, complete genome	436717	766169	766480	312	100	1e-157	99.36
Pcub_MSU1_v1_00514_0_2_1	1	258	Acinetobacter oleivorans DR1	Bacteria|Proteobacteria|Gammaproteobacteria|Pseudomonadales|Moraxellaceae|Acinetobacter|Acinetobacter oleivorans|Acinetobacter oleivorans DR1	Bacteria	Proteobacteria	Gammaproteobacteria	Pseudomonadales	Moraxellaceae	gi|298698338|gb|CP002080.1|	Acinetobacter oleivorans DR1, complete genome	436717	766499	766756	258	100	2e-129	99.61
Pcub_MSU1_v1_00519_0_0_1	1	1044	Delftia acidovorans SPH-1	Bacteria|Proteobacteria|Betaproteobacteria|Burkholderiales|Comamonadaceae|Delftia|Delftia acidovorans|Delftia acidovorans SPH-1	Bacteria	Proteobacteria	Betaproteobacteria	Burkholderiales	Comamonadaceae	gi|160361034|gb|CP000884.1|	Delftia acidovorans SPH-1, complete genome	398578	667362	666325	1044	100	0	93.77
Pcub_MSU1_v1_00521_0_1_1	1	1044	Acinetobacter oleivorans DR1	Bacteria|Proteobacteria|Gammaproteobacteria|Pseudomonadales|Moraxellaceae|Acinetobacter|Acinetobacter oleivorans|Acinetobacter oleivorans DR1	Bacteria	Proteobacteria	Gammaproteobacteria	Pseudomonadales	Moraxellaceae	gi|298698338|gb|CP002080.1|	Acinetobacter oleivorans DR1, complete genome	436717	182990	184033	1044	100	0	94.16
Pcub_MSU1_v1_00521_0_2_1	1	1059	Acinetobacter oleivorans DR1	Bacteria|Proteobacteria|Gammaproteobacteria|Pseudomonadales|Moraxellaceae|Acinetobacter|Acinetobacter oleivorans|Acinetobacter oleivorans DR1	Bacteria	Proteobacteria	Gammaproteobacteria	Pseudomonadales	Moraxellaceae	gi|298698338|gb|CP002080.1|	Acinetobacter oleivorans DR1, complete genome	436717	184587	185645	1059	100	0	93.86
Pcub_MSU1_v1_00521_0_4_1	1	1950	Acinetobacter oleivorans DR1	Bacteria|Proteobacteria|Gammaproteobacteria|Pseudomonadales|Moraxellaceae|Acinetobacter|Acinetobacter oleivorans|Acinetobacter oleivorans DR1	Bacteria	Proteobacteria	Gammaproteobacteria	Pseudomonadales	Moraxellaceae	gi|298698338|gb|CP002080.1|	Acinetobacter oleivorans DR1, complete genome	436717	189742	191691	1950	100	0	92.36
Pcub_MSU1_v1_00522_0_3_1	1	1164	Acinetobacter oleivorans DR1	Bacteria|Proteobacteria|Gammaproteobacteria|Pseudomonadales|Moraxellaceae|Acinetobacter|Acinetobacter oleivorans|Acinetobacter oleivorans DR1	Bacteria	Proteobacteria	Gammaproteobacteria	Pseudomonadales	Moraxellaceae	gi|298698338|gb|CP002080.1|	Acinetobacter oleivorans DR1, complete genome	436717	3637818	3638986	1170	100	0	92.74
Pcub_MSU1_v1_00522_0_4_1	1	1695	Acinetobacter oleivorans DR1	Bacteria|Proteobacteria|Gammaproteobacteria|Pseudomonadales|Moraxellaceae|Acinetobacter|Acinetobacter oleivorans|Acinetobacter oleivorans DR1	Bacteria	Proteobacteria	Gammaproteobacteria	Pseudomonadales	Moraxellaceae	gi|298698338|gb|CP002080.1|	Acinetobacter oleivorans DR1, complete genome	436717	3636048	3637742	1695	100	0	94.75
Pcub_MSU1_v1_00528_0_1_1	1	1374	Acinetobacter oleivorans DR1	Bacteria|Proteobacteria|Gammaproteobacteria|Pseudomonadales|Moraxellaceae|Acinetobacter|Acinetobacter oleivorans|Acinetobacter oleivorans DR1	Bacteria	Proteobacteria	Gammaproteobacteria	Pseudomonadales	Moraxellaceae	gi|298698338|gb|CP002080.1|	Acinetobacter oleivorans DR1, complete genome	436717	3892929	3894302	1374	100	0	95.92
Pcub_MSU1_v1_00538_0_0_1	1	1098	Acinetobacter oleivorans DR1	Bacteria|Proteobacteria|Gammaproteobacteria|Pseudomonadales|Moraxellaceae|Acinetobacter|Acinetobacter oleivorans|Acinetobacter oleivorans DR1	Bacteria	Proteobacteria	Gammaproteobacteria	Pseudomonadales	Moraxellaceae	gi|298698338|gb|CP002080.1|	Acinetobacter oleivorans DR1, complete genome	436717	3231162	3232259	1098	100	0	96.36
Pcub_MSU1_v1_00543_0_0_1	1	1497	Stenotrophomonas maltophilia D457	Bacteria|Proteobacteria|Gammaproteobacteria|Xanthomonadales|Xanthomonadaceae|Stenotrophomonas|Stenotrophomonas maltophilia group|Stenotrophomonas maltophilia|Stenotrophomonas maltophilia D457	Bacteria	Proteobacteria	Gammaproteobacteria	Xanthomonadales	Xanthomonadaceae	gi|384076029|emb|HE798556.1|	Stenotrophomonas maltophilia D457 complete genome	1163399	4188642	4187146	1497	100	0	99.67
Pcub_MSU1_v1_00543_0_9_1	1	687	Stenotrophomonas maltophilia D457	Bacteria|Proteobacteria|Gammaproteobacteria|Xanthomonadales|Xanthomonadaceae|Stenotrophomonas|Stenotrophomonas maltophilia group|Stenotrophomonas maltophilia|Stenotrophomonas maltophilia D457	Bacteria	Proteobacteria	Gammaproteobacteria	Xanthomonadales	Xanthomonadaceae	gi|384076029|emb|HE798556.1|	Stenotrophomonas maltophilia D457 complete genome	1163399	4184495	4183809	687	100	0	99.42
Pcub_MSU1_v1_00544_0_0_1	1	444	Acinetobacter oleivorans DR1	Bacteria|Proteobacteria|Gammaproteobacteria|Pseudomonadales|Moraxellaceae|Acinetobacter|Acinetobacter oleivorans|Acinetobacter oleivorans DR1	Bacteria	Proteobacteria	Gammaproteobacteria	Pseudomonadales	Moraxellaceae	gi|298698338|gb|CP002080.1|	Acinetobacter oleivorans DR1, complete genome	436717	107713	107270	444	100	7e-171	91.44
Pcub_MSU1_v1_00544_0_1_1	1	471	Acinetobacter oleivorans DR1	Bacteria|Proteobacteria|Gammaproteobacteria|Pseudomonadales|Moraxellaceae|Acinetobacter|Acinetobacter oleivorans|Acinetobacter oleivorans DR1	Bacteria	Proteobacteria	Gammaproteobacteria	Pseudomonadales	Moraxellaceae	gi|298698338|gb|CP002080.1|	Acinetobacter oleivorans DR1, complete genome	436717	101787	101317	471	100	0	99.36
Pcub_MSU1_v1_00544_0_2_1	1	1122	Acinetobacter oleivorans DR1	Bacteria|Proteobacteria|Gammaproteobacteria|Pseudomonadales|Moraxellaceae|Acinetobacter|Acinetobacter oleivorans|Acinetobacter oleivorans DR1	Bacteria	Proteobacteria	Gammaproteobacteria	Pseudomonadales	Moraxellaceae	gi|298698338|gb|CP002080.1|	Acinetobacter oleivorans DR1, complete genome	436717	102920	101799	1122	100	0	98.4
Pcub_MSU1_v1_00544_0_3_1	1	1041	Acinetobacter oleivorans DR1	Bacteria|Proteobacteria|Gammaproteobacteria|Pseudomonadales|Moraxellaceae|Acinetobacter|Acinetobacter oleivorans|Acinetobacter oleivorans DR1	Bacteria	Proteobacteria	Gammaproteobacteria	Pseudomonadales	Moraxellaceae	gi|298698338|gb|CP002080.1|	Acinetobacter oleivorans DR1, complete genome	436717	104710	105750	1041	100	0	93.66
Pcub_MSU1_v1_00545_0_0_1	1	1452	Stenotrophomonas maltophilia D457	Bacteria|Proteobacteria|Gammaproteobacteria|Xanthomonadales|Xanthomonadaceae|Stenotrophomonas|Stenotrophomonas maltophilia group|Stenotrophomonas maltophilia|Stenotrophomonas maltophilia D457	Bacteria	Proteobacteria	Gammaproteobacteria	Xanthomonadales	Xanthomonadaceae	gi|384076029|emb|HE798556.1|	Stenotrophomonas maltophilia D457 complete genome	1163399	1080604	1079153	1452	100	0	99.79
Pcub_MSU1_v1_00545_0_1_1	1	1725	Stenotrophomonas maltophilia D457	Bacteria|Proteobacteria|Gammaproteobacteria|Xanthomonadales|Xanthomonadaceae|Stenotrophomonas|Stenotrophomonas maltophilia group|Stenotrophomonas maltophilia|Stenotrophomonas maltophilia D457	Bacteria	Proteobacteria	Gammaproteobacteria	Xanthomonadales	Xanthomonadaceae	gi|384076029|emb|HE798556.1|	Stenotrophomonas maltophilia D457 complete genome	1163399	1074404	1072680	1725	100	0	99.59
Pcub_MSU1_v1_00545_0_9_1	1	1377	Stenotrophomonas maltophilia D457	Bacteria|Proteobacteria|Gammaproteobacteria|Xanthomonadales|Xanthomonadaceae|Stenotrophomonas|Stenotrophomonas maltophilia group|Stenotrophomonas maltophilia|Stenotrophomonas maltophilia D457	Bacteria	Proteobacteria	Gammaproteobacteria	Xanthomonadales	Xanthomonadaceae	gi|384076029|emb|HE798556.1|	Stenotrophomonas maltophilia D457 complete genome	1163399	1075794	1074418	1377	100	0	99.42
Pcub_MSU1_v1_00551_0_1_1	1	1890	Acinetobacter oleivorans DR1	Bacteria|Proteobacteria|Gammaproteobacteria|Pseudomonadales|Moraxellaceae|Acinetobacter|Acinetobacter oleivorans|Acinetobacter oleivorans DR1	Bacteria	Proteobacteria	Gammaproteobacteria	Pseudomonadales	Moraxellaceae	gi|298698338|gb|CP002080.1|	Acinetobacter oleivorans DR1, complete genome	436717	4000114	3998225	1890	100	0	91.53
Pcub_MSU1_v1_00551_0_2_1	1	1794	Acinetobacter oleivorans DR1	Bacteria|Proteobacteria|Gammaproteobacteria|Pseudomonadales|Moraxellaceae|Acinetobacter|Acinetobacter oleivorans|Acinetobacter oleivorans DR1	Bacteria	Proteobacteria	Gammaproteobacteria	Pseudomonadales	Moraxellaceae	gi|298698338|gb|CP002080.1|	Acinetobacter oleivorans DR1, complete genome	436717	3998192	3996399	1794	100	0	92.08
Pcub_MSU1_v1_00564_0_0_1	1	1095	Delftia sp. Cs1-4	Bacteria|Proteobacteria|Betaproteobacteria|Burkholderiales|Comamonadaceae|Delftia|Delftia sp. Cs1-4	Bacteria	Proteobacteria	Betaproteobacteria	Burkholderiales	Comamonadaceae	gi|333741867|gb|CP002735.1|	Delftia sp. Cs1-4, complete genome	742013	797759	798853	1095	100	0	97.63
Pcub_MSU1_v1_00564_0_1_1	1	348	Pantholops hodgsonii	Eukaryota|Opisthokonta|Metazoa|Eumetazoa|Bilateria|Deuterostomia|Chordata|Craniata|Vertebrata|Gnathostomata|Teleostomi|Euteleostomi|Sarcopterygii|Dipnotetrapodomorpha|Tetrapoda|Amniota|Mammalia|Theria|Eutheria|Boreoeutheria|Laurasiatheria|Cetartiodactyla|Ruminantia|Pecora|Bovidae|Antilopinae|Pantholops|Pantholops hodgsonii	Eukaryota	Opisthokonta	Metazoa	Eumetazoa	Bilateria	gi|556760861|ref|XM_005975684.1|	PREDICTED: Pantholops hodgsonii glycine-rich RNA-binding, abscisic acid-inducible protein-like (LOC102334554), mRNA	59538	1	348	348	100	1e-172	98.56
Pcub_MSU1_v1_00569_0_1_1	1	1470	Acinetobacter oleivorans DR1	Bacteria|Proteobacteria|Gammaproteobacteria|Pseudomonadales|Moraxellaceae|Acinetobacter|Acinetobacter oleivorans|Acinetobacter oleivorans DR1	Bacteria	Proteobacteria	Gammaproteobacteria	Pseudomonadales	Moraxellaceae	gi|298698338|gb|CP002080.1|	Acinetobacter oleivorans DR1, complete genome	436717	706584	705115	1471	100	0	93.61
Pcub_MSU1_v1_00569_0_1_2	1	1479	Acinetobacter oleivorans DR1	Bacteria|Proteobacteria|Gammaproteobacteria|Pseudomonadales|Moraxellaceae|Acinetobacter|Acinetobacter oleivorans|Acinetobacter oleivorans DR1	Bacteria	Proteobacteria	Gammaproteobacteria	Pseudomonadales	Moraxellaceae	gi|298698338|gb|CP002080.1|	Acinetobacter oleivorans DR1, complete genome	436717	708062	706584	1479	100	0	92.83
Pcub_MSU1_v1_00594_0_2_1	1	951	Acinetobacter calcoaceticus PHEA-2	Bacteria|Proteobacteria|Gammaproteobacteria|Pseudomonadales|Moraxellaceae|Acinetobacter|Acinetobacter calcoaceticus/baumannii complex|Acinetobacter calcoaceticus|Acinetobacter calcoaceticus PHEA-2	Bacteria	Proteobacteria	Gammaproteobacteria	Pseudomonadales	Moraxellaceae	gi|325121063|gb|CP002177.1|	Acinetobacter calcoaceticus PHEA-2, complete genome	871585	2760942	2761892	951	100	0	93.38
Pcub_MSU1_v1_00594_0_3_1	1	789	Acinetobacter oleivorans DR1	Bacteria|Proteobacteria|Gammaproteobacteria|Pseudomonadales|Moraxellaceae|Acinetobacter|Acinetobacter oleivorans|Acinetobacter oleivorans DR1	Bacteria	Proteobacteria	Gammaproteobacteria	Pseudomonadales	Moraxellaceae	gi|298698338|gb|CP002080.1|	Acinetobacter oleivorans DR1, complete genome	436717	423479	422691	789	100	0	91.76
Pcub_MSU1_v1_00594_0_5_1	1	822	Acinetobacter oleivorans DR1	Bacteria|Proteobacteria|Gammaproteobacteria|Pseudomonadales|Moraxellaceae|Acinetobacter|Acinetobacter oleivorans|Acinetobacter oleivorans DR1	Bacteria	Proteobacteria	Gammaproteobacteria	Pseudomonadales	Moraxellaceae	gi|298698338|gb|CP002080.1|	Acinetobacter oleivorans DR1, complete genome	436717	427675	428496	822	100	0	97.2
Pcub_MSU1_v1_00600_0_1_1	1	933	Acinetobacter oleivorans DR1	Bacteria|Proteobacteria|Gammaproteobacteria|Pseudomonadales|Moraxellaceae|Acinetobacter|Acinetobacter oleivorans|Acinetobacter oleivorans DR1	Bacteria	Proteobacteria	Gammaproteobacteria	Pseudomonadales	Moraxellaceae	gi|298698338|gb|CP002080.1|	Acinetobacter oleivorans DR1, complete genome	436717	789356	788424	933	100	0	97.32
Pcub_MSU1_v1_00600_0_2_1	1	1185	Acinetobacter oleivorans DR1	Bacteria|Proteobacteria|Gammaproteobacteria|Pseudomonadales|Moraxellaceae|Acinetobacter|Acinetobacter oleivorans|Acinetobacter oleivorans DR1	Bacteria	Proteobacteria	Gammaproteobacteria	Pseudomonadales	Moraxellaceae	gi|298698338|gb|CP002080.1|	Acinetobacter oleivorans DR1, complete genome	436717	780495	779311	1185	100	0	93.5
Pcub_MSU1_v1_00600_0_3_1	1	1401	Acinetobacter oleivorans DR1	Bacteria|Proteobacteria|Gammaproteobacteria|Pseudomonadales|Moraxellaceae|Acinetobacter|Acinetobacter oleivorans|Acinetobacter oleivorans DR1	Bacteria	Proteobacteria	Gammaproteobacteria	Pseudomonadales	Moraxellaceae	gi|298698338|gb|CP002080.1|	Acinetobacter oleivorans DR1, complete genome	436717	779059	777659	1401	100	0	95.86
Pcub_MSU1_v1_00622_0_3_1	1	294	Delftia acidovorans SPH-1	Bacteria|Proteobacteria|Betaproteobacteria|Burkholderiales|Comamonadaceae|Delftia|Delftia acidovorans|Delftia acidovorans SPH-1	Bacteria	Proteobacteria	Betaproteobacteria	Burkholderiales	Comamonadaceae	gi|160361034|gb|CP000884.1|	Delftia acidovorans SPH-1, complete genome	398578	5939906	5940199	294	100	2e-119	93.54
Pcub_MSU1_v1_00631_0_1_1	1	1206	Acinetobacter oleivorans DR1	Bacteria|Proteobacteria|Gammaproteobacteria|Pseudomonadales|Moraxellaceae|Acinetobacter|Acinetobacter oleivorans|Acinetobacter oleivorans DR1	Bacteria	Proteobacteria	Gammaproteobacteria	Pseudomonadales	Moraxellaceae	gi|298698338|gb|CP002080.1|	Acinetobacter oleivorans DR1, complete genome	436717	87428	88633	1206	100	0	93.28
Pcub_MSU1_v1_00631_0_3_1	1	1539	Acinetobacter oleivorans DR1	Bacteria|Proteobacteria|Gammaproteobacteria|Pseudomonadales|Moraxellaceae|Acinetobacter|Acinetobacter oleivorans|Acinetobacter oleivorans DR1	Bacteria	Proteobacteria	Gammaproteobacteria	Pseudomonadales	Moraxellaceae	gi|298698338|gb|CP002080.1|	Acinetobacter oleivorans DR1, complete genome	436717	84361	85899	1539	100	0	92.72
Pcub_MSU1_v1_00631_0_4_1	1	1578	Acinetobacter oleivorans DR1	Bacteria|Proteobacteria|Gammaproteobacteria|Pseudomonadales|Moraxellaceae|Acinetobacter|Acinetobacter oleivorans|Acinetobacter oleivorans DR1	Bacteria	Proteobacteria	Gammaproteobacteria	Pseudomonadales	Moraxellaceae	gi|298698338|gb|CP002080.1|	Acinetobacter oleivorans DR1, complete genome	436717	82696	84273	1578	100	0	95.37
Pcub_MSU1_v1_00645_0_0_1	1	2439	Delftia acidovorans SPH-1	Bacteria|Proteobacteria|Betaproteobacteria|Burkholderiales|Comamonadaceae|Delftia|Delftia acidovorans|Delftia acidovorans SPH-1	Bacteria	Proteobacteria	Betaproteobacteria	Burkholderiales	Comamonadaceae	gi|160361034|gb|CP000884.1|	Delftia acidovorans SPH-1, complete genome	398578	477938	475500	2439	100	0	99.92
Pcub_MSU1_v1_00646_0_1_1	1	1230	Acinetobacter oleivorans DR1	Bacteria|Proteobacteria|Gammaproteobacteria|Pseudomonadales|Moraxellaceae|Acinetobacter|Acinetobacter oleivorans|Acinetobacter oleivorans DR1	Bacteria	Proteobacteria	Gammaproteobacteria	Pseudomonadales	Moraxellaceae	gi|298698338|gb|CP002080.1|	Acinetobacter oleivorans DR1, complete genome	436717	3978565	3979794	1231	100	0	92.61
Pcub_MSU1_v1_00646_0_2_1	1	1569	Acinetobacter oleivorans DR1	Bacteria|Proteobacteria|Gammaproteobacteria|Pseudomonadales|Moraxellaceae|Acinetobacter|Acinetobacter oleivorans|Acinetobacter oleivorans DR1	Bacteria	Proteobacteria	Gammaproteobacteria	Pseudomonadales	Moraxellaceae	gi|298698338|gb|CP002080.1|	Acinetobacter oleivorans DR1, complete genome	436717	3978191	3976623	1569	100	0	95.79
Pcub_MSU1_v1_00651_0_2_1	1	537	Acinetobacter oleivorans DR1	Bacteria|Proteobacteria|Gammaproteobacteria|Pseudomonadales|Moraxellaceae|Acinetobacter|Acinetobacter oleivorans|Acinetobacter oleivorans DR1	Bacteria	Proteobacteria	Gammaproteobacteria	Pseudomonadales	Moraxellaceae	gi|298698338|gb|CP002080.1|	Acinetobacter oleivorans DR1, complete genome	436717	3960341	3959805	537	100	0	98.7
Pcub_MSU1_v1_00651_0_20_1	1	1545	Acinetobacter oleivorans DR1	Bacteria|Proteobacteria|Gammaproteobacteria|Pseudomonadales|Moraxellaceae|Acinetobacter|Acinetobacter oleivorans|Acinetobacter oleivorans DR1	Bacteria	Proteobacteria	Gammaproteobacteria	Pseudomonadales	Moraxellaceae	gi|298698338|gb|CP002080.1|	Acinetobacter oleivorans DR1, complete genome	436717	3959758	3958214	1545	100	0	99.29
Pcub_MSU1_v1_00651_0_4_1	1	870	Acinetobacter oleivorans DR1	Bacteria|Proteobacteria|Gammaproteobacteria|Pseudomonadales|Moraxellaceae|Acinetobacter|Acinetobacter oleivorans|Acinetobacter oleivorans DR1	Bacteria	Proteobacteria	Gammaproteobacteria	Pseudomonadales	Moraxellaceae	gi|298698338|gb|CP002080.1|	Acinetobacter oleivorans DR1, complete genome	436717	3958136	3957267	870	100	0	99.08
Pcub_MSU1_v1_00651_0_5_1	1	765	Acinetobacter oleivorans DR1	Bacteria|Proteobacteria|Gammaproteobacteria|Pseudomonadales|Moraxellaceae|Acinetobacter|Acinetobacter oleivorans|Acinetobacter oleivorans DR1	Bacteria	Proteobacteria	Gammaproteobacteria	Pseudomonadales	Moraxellaceae	gi|298698338|gb|CP002080.1|	Acinetobacter oleivorans DR1, complete genome	436717	3957236	3956472	765	100	0	98.3
Pcub_MSU1_v1_00682_0_0_1	1	2298	Delftia acidovorans SPH-1	Bacteria|Proteobacteria|Betaproteobacteria|Burkholderiales|Comamonadaceae|Delftia|Delftia acidovorans|Delftia acidovorans SPH-1	Bacteria	Proteobacteria	Betaproteobacteria	Burkholderiales	Comamonadaceae	gi|160361034|gb|CP000884.1|	Delftia acidovorans SPH-1, complete genome	398578	5972298	5974595	2301	100	0	91.74
Pcub_MSU1_v1_00687_0_15_1	1	1380	Pantholops hodgsonii	Eukaryota|Opisthokonta|Metazoa|Eumetazoa|Bilateria|Deuterostomia|Chordata|Craniata|Vertebrata|Gnathostomata|Teleostomi|Euteleostomi|Sarcopterygii|Dipnotetrapodomorpha|Tetrapoda|Amniota|Mammalia|Theria|Eutheria|Boreoeutheria|Laurasiatheria|Cetartiodactyla|Ruminantia|Pecora|Bovidae|Antilopinae|Pantholops|Pantholops hodgsonii	Eukaryota	Opisthokonta	Metazoa	Eumetazoa	Bilateria	gi|556756438|ref|XM_005973507.1|	PREDICTED: Pantholops hodgsonii adenylosuccinate lyase-like (LOC102329665), mRNA	59538	205	1584	1380	100	0	98.99
Pcub_MSU1_v1_00687_0_5_1	1	1089	Delftia sp. Cs1-4	Bacteria|Proteobacteria|Betaproteobacteria|Burkholderiales|Comamonadaceae|Delftia|Delftia sp. Cs1-4	Bacteria	Proteobacteria	Betaproteobacteria	Burkholderiales	Comamonadaceae	gi|333741867|gb|CP002735.1|	Delftia sp. Cs1-4, complete genome	742013	6385744	6386832	1089	100	0	93.76
Pcub_MSU1_v1_00701_0_0_1	1	855	Cucumis hystrix	Eukaryota|Viridiplantae|Streptophyta|Streptophytina|Embryophyta|Tracheophyta|Euphyllophyta|Spermatophyta|Magnoliophyta|Mesangiospermae|eudicotyledons|Gunneridae|Pentapetalae|rosids|fabids|Cucurbitales|Cucurbitaceae|Benincaseae|Cucumis|Cucumis hystrix	Eukaryota	Viridiplantae	Streptophyta	Streptophytina	Embryophyta	gi|586598666|gb|KF957866.1|	Cucumis hystrix plastid, complete genome	396994	22939	22085	855	100	0	100
Pcub_MSU1_v1_00712_0_0_1	1	1200	Delftia acidovorans SPH-1	Bacteria|Proteobacteria|Betaproteobacteria|Burkholderiales|Comamonadaceae|Delftia|Delftia acidovorans|Delftia acidovorans SPH-1	Bacteria	Proteobacteria	Betaproteobacteria	Burkholderiales	Comamonadaceae	gi|160361034|gb|CP000884.1|	Delftia acidovorans SPH-1, complete genome	398578	688893	687694	1200	100	0	96.67
Pcub_MSU1_v1_00712_0_3_1	1	1965	Delftia acidovorans SPH-1	Bacteria|Proteobacteria|Betaproteobacteria|Burkholderiales|Comamonadaceae|Delftia|Delftia acidovorans|Delftia acidovorans SPH-1	Bacteria	Proteobacteria	Betaproteobacteria	Burkholderiales	Comamonadaceae	gi|160361034|gb|CP000884.1|	Delftia acidovorans SPH-1, complete genome	398578	690878	688917	1965	100	0	94.96
Pcub_MSU1_v1_00728_0_2_1	1	1530	Acinetobacter oleivorans DR1	Bacteria|Proteobacteria|Gammaproteobacteria|Pseudomonadales|Moraxellaceae|Acinetobacter|Acinetobacter oleivorans|Acinetobacter oleivorans DR1	Bacteria	Proteobacteria	Gammaproteobacteria	Pseudomonadales	Moraxellaceae	gi|298698338|gb|CP002080.1|	Acinetobacter oleivorans DR1, complete genome	436717	395547	397095	1549	100	0	91.99
Pcub_MSU1_v1_00732_0_1_1	1	1491	Acinetobacter oleivorans DR1	Bacteria|Proteobacteria|Gammaproteobacteria|Pseudomonadales|Moraxellaceae|Acinetobacter|Acinetobacter oleivorans|Acinetobacter oleivorans DR1	Bacteria	Proteobacteria	Gammaproteobacteria	Pseudomonadales	Moraxellaceae	gi|298698338|gb|CP002080.1|	Acinetobacter oleivorans DR1, complete genome	436717	2361605	2363095	1491	100	0	96.18
Pcub_MSU1_v1_00732_0_3_1	1	375	Acinetobacter calcoaceticus PHEA-2	Bacteria|Proteobacteria|Gammaproteobacteria|Pseudomonadales|Moraxellaceae|Acinetobacter|Acinetobacter calcoaceticus/baumannii complex|Acinetobacter calcoaceticus|Acinetobacter calcoaceticus PHEA-2	Bacteria	Proteobacteria	Gammaproteobacteria	Pseudomonadales	Moraxellaceae	gi|325121063|gb|CP002177.1|	Acinetobacter calcoaceticus PHEA-2, complete genome	871585	972475	972101	375	100	3e-159	94.13
Pcub_MSU1_v1_00733_0_1_1	1	1047	Stenotrophomonas maltophilia D457	Bacteria|Proteobacteria|Gammaproteobacteria|Xanthomonadales|Xanthomonadaceae|Stenotrophomonas|Stenotrophomonas maltophilia group|Stenotrophomonas maltophilia|Stenotrophomonas maltophilia D457	Bacteria	Proteobacteria	Gammaproteobacteria	Xanthomonadales	Xanthomonadaceae	gi|384076029|emb|HE798556.1|	Stenotrophomonas maltophilia D457 complete genome	1163399	2481344	2480298	1047	100	0	99.33
Pcub_MSU1_v1_00733_0_3_1	1	612	Stenotrophomonas maltophilia D457	Bacteria|Proteobacteria|Gammaproteobacteria|Xanthomonadales|Xanthomonadaceae|Stenotrophomonas|Stenotrophomonas maltophilia group|Stenotrophomonas maltophilia|Stenotrophomonas maltophilia D457	Bacteria	Proteobacteria	Gammaproteobacteria	Xanthomonadales	Xanthomonadaceae	gi|384076029|emb|HE798556.1|	Stenotrophomonas maltophilia D457 complete genome	1163399	2486197	2485586	612	100	0	93.63
Pcub_MSU1_v1_00733_0_9_1	1	195	Stenotrophomonas maltophilia D457	Bacteria|Proteobacteria|Gammaproteobacteria|Xanthomonadales|Xanthomonadaceae|Stenotrophomonas|Stenotrophomonas maltophilia group|Stenotrophomonas maltophilia|Stenotrophomonas maltophilia D457	Bacteria	Proteobacteria	Gammaproteobacteria	Xanthomonadales	Xanthomonadaceae	gi|384076029|emb|HE798556.1|	Stenotrophomonas maltophilia D457 complete genome	1163399	2479353	2479547	195	100	3e-96	100
Pcub_MSU1_v1_00787_0_1_1	1	807	Culex quinquefasciatus	Eukaryota|Opisthokonta|Metazoa|Eumetazoa|Bilateria|Protostomia|Ecdysozoa|Panarthropoda|Arthropoda|Mandibulata|Pancrustacea|Hexapoda|Insecta|Dicondylia|Pterygota|Neoptera|Endopterygota|Diptera|Nematocera|Culicomorpha|Culicoidea|Culicidae|Culicinae|Culicini|Culex|Culex|Culex pipiens complex|Culex quinquefasciatus	Eukaryota	Opisthokonta	Metazoa	Eumetazoa	Bilateria	gi|78190082|gb|AC168047.3|	Culex pipiens quinquefasciatus, clone Culex pipiens quinquefasciatus-3940115D9, complete sequence	7176	7192	8004	814	100	0	94.96
Pcub_MSU1_v1_00787_0_3_1	1	1431	Delftia acidovorans SPH-1	Bacteria|Proteobacteria|Betaproteobacteria|Burkholderiales|Comamonadaceae|Delftia|Delftia acidovorans|Delftia acidovorans SPH-1	Bacteria	Proteobacteria	Betaproteobacteria	Burkholderiales	Comamonadaceae	gi|160361034|gb|CP000884.1|	Delftia acidovorans SPH-1, complete genome	398578	5499431	5500861	1431	100	0	96.72
Pcub_MSU1_v1_00793_0_0_1	1	2085	Acinetobacter oleivorans DR1	Bacteria|Proteobacteria|Gammaproteobacteria|Pseudomonadales|Moraxellaceae|Acinetobacter|Acinetobacter oleivorans|Acinetobacter oleivorans DR1	Bacteria	Proteobacteria	Gammaproteobacteria	Pseudomonadales	Moraxellaceae	gi|298698338|gb|CP002080.1|	Acinetobacter oleivorans DR1, complete genome	436717	3711071	3713161	2094	100	0	92.26
Pcub_MSU1_v1_00793_0_2_1	1	933	Acinetobacter oleivorans DR1	Bacteria|Proteobacteria|Gammaproteobacteria|Pseudomonadales|Moraxellaceae|Acinetobacter|Acinetobacter oleivorans|Acinetobacter oleivorans DR1	Bacteria	Proteobacteria	Gammaproteobacteria	Pseudomonadales	Moraxellaceae	gi|298698338|gb|CP002080.1|	Acinetobacter oleivorans DR1, complete genome	436717	3709089	3708157	933	100	0	93.89
Pcub_MSU1_v1_00796_0_12_1	1	1101	Pantholops hodgsonii	Eukaryota|Opisthokonta|Metazoa|Eumetazoa|Bilateria|Deuterostomia|Chordata|Craniata|Vertebrata|Gnathostomata|Teleostomi|Euteleostomi|Sarcopterygii|Dipnotetrapodomorpha|Tetrapoda|Amniota|Mammalia|Theria|Eutheria|Boreoeutheria|Laurasiatheria|Cetartiodactyla|Ruminantia|Pecora|Bovidae|Antilopinae|Pantholops|Pantholops hodgsonii	Eukaryota	Opisthokonta	Metazoa	Eumetazoa	Bilateria	gi|556750104|ref|XM_005970409.1|	PREDICTED: Pantholops hodgsonii l-2-hydroxyglutarate dehydrogenase, mitochondrial-like (LOC102316576), mRNA	59538	1	1101	1101	100	0	99.27
Pcub_MSU1_v1_00796_0_17_1	1	1884	Delftia acidovorans SPH-1	Bacteria|Proteobacteria|Betaproteobacteria|Burkholderiales|Comamonadaceae|Delftia|Delftia acidovorans|Delftia acidovorans SPH-1	Bacteria	Proteobacteria	Betaproteobacteria	Burkholderiales	Comamonadaceae	gi|160361034|gb|CP000884.1|	Delftia acidovorans SPH-1, complete genome	398578	4406267	4404384	1885	100	0	93.9
Pcub_MSU1_v1_00799_0_1_1	1	1536	Acinetobacter oleivorans DR1	Bacteria|Proteobacteria|Gammaproteobacteria|Pseudomonadales|Moraxellaceae|Acinetobacter|Acinetobacter oleivorans|Acinetobacter oleivorans DR1	Bacteria	Proteobacteria	Gammaproteobacteria	Pseudomonadales	Moraxellaceae	gi|298698338|gb|CP002080.1|	Acinetobacter oleivorans DR1, complete genome	436717	4012133	4010598	1536	100	0	93.36
Pcub_MSU1_v1_00799_0_2_1	1	1128	Acinetobacter oleivorans DR1	Bacteria|Proteobacteria|Gammaproteobacteria|Pseudomonadales|Moraxellaceae|Acinetobacter|Acinetobacter oleivorans|Acinetobacter oleivorans DR1	Bacteria	Proteobacteria	Gammaproteobacteria	Pseudomonadales	Moraxellaceae	gi|298698338|gb|CP002080.1|	Acinetobacter oleivorans DR1, complete genome	436717	4007957	4006830	1128	100	0	92.82
Pcub_MSU1_v1_00799_0_3_1	1	774	Acinetobacter oleivorans DR1	Bacteria|Proteobacteria|Gammaproteobacteria|Pseudomonadales|Moraxellaceae|Acinetobacter|Acinetobacter oleivorans|Acinetobacter oleivorans DR1	Bacteria	Proteobacteria	Gammaproteobacteria	Pseudomonadales	Moraxellaceae	gi|298698338|gb|CP002080.1|	Acinetobacter oleivorans DR1, complete genome	436717	4006808	4006035	774	100	0	95.61
Pcub_MSU1_v1_00799_0_4_1	1	1026	Acinetobacter baumannii ACICU	Bacteria|Proteobacteria|Gammaproteobacteria|Pseudomonadales|Moraxellaceae|Acinetobacter|Acinetobacter calcoaceticus/baumannii complex|Acinetobacter baumannii|Acinetobacter baumannii ACICU	Bacteria	Proteobacteria	Gammaproteobacteria	Pseudomonadales	Moraxellaceae	gi|183207914|gb|CP000863.1|	Acinetobacter baumannii ACICU, complete genome	405416	151125	152150	1026	100	0	91.42
Pcub_MSU1_v1_00802_0_0_1	1	981	Acinetobacter oleivorans DR1	Bacteria|Proteobacteria|Gammaproteobacteria|Pseudomonadales|Moraxellaceae|Acinetobacter|Acinetobacter oleivorans|Acinetobacter oleivorans DR1	Bacteria	Proteobacteria	Gammaproteobacteria	Pseudomonadales	Moraxellaceae	gi|298698338|gb|CP002080.1|	Acinetobacter oleivorans DR1, complete genome	436717	1263474	1264454	981	100	0	96.23
Pcub_MSU1_v1_00802_0_1_1	1	1542	Acinetobacter oleivorans DR1	Bacteria|Proteobacteria|Gammaproteobacteria|Pseudomonadales|Moraxellaceae|Acinetobacter|Acinetobacter oleivorans|Acinetobacter oleivorans DR1	Bacteria	Proteobacteria	Gammaproteobacteria	Pseudomonadales	Moraxellaceae	gi|298698338|gb|CP002080.1|	Acinetobacter oleivorans DR1, complete genome	436717	1265074	1266615	1542	100	0	94.88
Pcub_MSU1_v1_00810_0_2_1	1	1089	Delftia sp. Cs1-4	Bacteria|Proteobacteria|Betaproteobacteria|Burkholderiales|Comamonadaceae|Delftia|Delftia sp. Cs1-4	Bacteria	Proteobacteria	Betaproteobacteria	Burkholderiales	Comamonadaceae	gi|333741867|gb|CP002735.1|	Delftia sp. Cs1-4, complete genome	742013	2789520	2788432	1090	100	0	91.56
Pcub_MSU1_v1_00810_0_3_1	1	855	Pantholops hodgsonii	Eukaryota|Opisthokonta|Metazoa|Eumetazoa|Bilateria|Deuterostomia|Chordata|Craniata|Vertebrata|Gnathostomata|Teleostomi|Euteleostomi|Sarcopterygii|Dipnotetrapodomorpha|Tetrapoda|Amniota|Mammalia|Theria|Eutheria|Boreoeutheria|Laurasiatheria|Cetartiodactyla|Ruminantia|Pecora|Bovidae|Antilopinae|Pantholops|Pantholops hodgsonii	Eukaryota	Opisthokonta	Metazoa	Eumetazoa	Bilateria	gi|556779725|ref|XM_005984846.1|	PREDICTED: Pantholops hodgsonii phosphatidylserine decarboxylase proenzyme 2, mitochondrial-like (LOC102318884), mRNA	59538	61	915	855	100	0	99.65
Pcub_MSU1_v1_00810_0_4_1	1	624	Pantholops hodgsonii	Eukaryota|Opisthokonta|Metazoa|Eumetazoa|Bilateria|Deuterostomia|Chordata|Craniata|Vertebrata|Gnathostomata|Teleostomi|Euteleostomi|Sarcopterygii|Dipnotetrapodomorpha|Tetrapoda|Amniota|Mammalia|Theria|Eutheria|Boreoeutheria|Laurasiatheria|Cetartiodactyla|Ruminantia|Pecora|Bovidae|Antilopinae|Pantholops|Pantholops hodgsonii	Eukaryota	Opisthokonta	Metazoa	Eumetazoa	Bilateria	gi|556779727|ref|XM_005984847.1|	PREDICTED: Pantholops hodgsonii glutathione S-transferase 3-like (LOC102319236), mRNA	59538	1	624	624	100	0	99.68
Pcub_MSU1_v1_00816_0_1_1	1	1230	Acinetobacter oleivorans DR1	Bacteria|Proteobacteria|Gammaproteobacteria|Pseudomonadales|Moraxellaceae|Acinetobacter|Acinetobacter oleivorans|Acinetobacter oleivorans DR1	Bacteria	Proteobacteria	Gammaproteobacteria	Pseudomonadales	Moraxellaceae	gi|298698338|gb|CP002080.1|	Acinetobacter oleivorans DR1, complete genome	436717	78293	79522	1230	100	0	92.03
Pcub_MSU1_v1_00816_0_2_1	1	1056	Acinetobacter oleivorans DR1	Bacteria|Proteobacteria|Gammaproteobacteria|Pseudomonadales|Moraxellaceae|Acinetobacter|Acinetobacter oleivorans|Acinetobacter oleivorans DR1	Bacteria	Proteobacteria	Gammaproteobacteria	Pseudomonadales	Moraxellaceae	gi|298698338|gb|CP002080.1|	Acinetobacter oleivorans DR1, complete genome	436717	70834	71889	1056	100	0	96.4
Pcub_MSU1_v1_00817_0_0_1	1	336	Acinetobacter oleivorans DR1	Bacteria|Proteobacteria|Gammaproteobacteria|Pseudomonadales|Moraxellaceae|Acinetobacter|Acinetobacter oleivorans|Acinetobacter oleivorans DR1	Bacteria	Proteobacteria	Gammaproteobacteria	Pseudomonadales	Moraxellaceae	gi|298698338|gb|CP002080.1|	Acinetobacter oleivorans DR1, complete genome	436717	14071	14406	336	100	1e-147	95.24
Pcub_MSU1_v1_00817_0_1_1	1	1974	Acinetobacter oleivorans DR1	Bacteria|Proteobacteria|Gammaproteobacteria|Pseudomonadales|Moraxellaceae|Acinetobacter|Acinetobacter oleivorans|Acinetobacter oleivorans DR1	Bacteria	Proteobacteria	Gammaproteobacteria	Pseudomonadales	Moraxellaceae	gi|298698338|gb|CP002080.1|	Acinetobacter oleivorans DR1, complete genome	436717	10113	8137	1977	100	0	91.45
Pcub_MSU1_v1_00833_0_0_1	1	1218	Acinetobacter calcoaceticus PHEA-2	Bacteria|Proteobacteria|Gammaproteobacteria|Pseudomonadales|Moraxellaceae|Acinetobacter|Acinetobacter calcoaceticus/baumannii complex|Acinetobacter calcoaceticus|Acinetobacter calcoaceticus PHEA-2	Bacteria	Proteobacteria	Gammaproteobacteria	Pseudomonadales	Moraxellaceae	gi|325121063|gb|CP002177.1|	Acinetobacter calcoaceticus PHEA-2, complete genome	871585	244358	245575	1218	100	0	92.2
Pcub_MSU1_v1_00840_0_17_1	1	984	Stenotrophomonas maltophilia D457	Bacteria|Proteobacteria|Gammaproteobacteria|Xanthomonadales|Xanthomonadaceae|Stenotrophomonas|Stenotrophomonas maltophilia group|Stenotrophomonas maltophilia|Stenotrophomonas maltophilia D457	Bacteria	Proteobacteria	Gammaproteobacteria	Xanthomonadales	Xanthomonadaceae	gi|384076029|emb|HE798556.1|	Stenotrophomonas maltophilia D457 complete genome	1163399	2472668	2471685	984	100	0	99.8
Pcub_MSU1_v1_00840_0_2_1	1	1314	Stenotrophomonas maltophilia D457	Bacteria|Proteobacteria|Gammaproteobacteria|Xanthomonadales|Xanthomonadaceae|Stenotrophomonas|Stenotrophomonas maltophilia group|Stenotrophomonas maltophilia|Stenotrophomonas maltophilia D457	Bacteria	Proteobacteria	Gammaproteobacteria	Xanthomonadales	Xanthomonadaceae	gi|384076029|emb|HE798556.1|	Stenotrophomonas maltophilia D457 complete genome	1163399	2468617	2467304	1314	100	0	99.16
Pcub_MSU1_v1_00842_0_0_1	1	2157	Acinetobacter oleivorans DR1	Bacteria|Proteobacteria|Gammaproteobacteria|Pseudomonadales|Moraxellaceae|Acinetobacter|Acinetobacter oleivorans|Acinetobacter oleivorans DR1	Bacteria	Proteobacteria	Gammaproteobacteria	Pseudomonadales	Moraxellaceae	gi|298698338|gb|CP002080.1|	Acinetobacter oleivorans DR1, complete genome	436717	3700222	3702378	2157	100	0	92.21
Pcub_MSU1_v1_00848_0_0_1	1	708	Acinetobacter oleivorans DR1	Bacteria|Proteobacteria|Gammaproteobacteria|Pseudomonadales|Moraxellaceae|Acinetobacter|Acinetobacter oleivorans|Acinetobacter oleivorans DR1	Bacteria	Proteobacteria	Gammaproteobacteria	Pseudomonadales	Moraxellaceae	gi|298698338|gb|CP002080.1|	Acinetobacter oleivorans DR1, complete genome	436717	2926320	2927027	708	100	0	90.82
Pcub_MSU1_v1_00848_0_1_1	1	1452	Acinetobacter baumannii	Bacteria|Proteobacteria|Gammaproteobacteria|Pseudomonadales|Moraxellaceae|Acinetobacter|Acinetobacter calcoaceticus/baumannii complex|Acinetobacter baumannii	Bacteria	Proteobacteria	Gammaproteobacteria	Pseudomonadales	Moraxellaceae	gi|693578048|dbj|AP014649.1|	Acinetobacter baumannii DNA, complete genome, strain: IOMTU 433	470	2764613	2766064	1452	100	0	92.63
Pcub_MSU1_v1_00853_0_0_1	1	573	Pantholops hodgsonii	Eukaryota|Opisthokonta|Metazoa|Eumetazoa|Bilateria|Deuterostomia|Chordata|Craniata|Vertebrata|Gnathostomata|Teleostomi|Euteleostomi|Sarcopterygii|Dipnotetrapodomorpha|Tetrapoda|Amniota|Mammalia|Theria|Eutheria|Boreoeutheria|Laurasiatheria|Cetartiodactyla|Ruminantia|Pecora|Bovidae|Antilopinae|Pantholops|Pantholops hodgsonii	Eukaryota	Opisthokonta	Metazoa	Eumetazoa	Bilateria	gi|556756440|ref|XM_005973508.1|	PREDICTED: Pantholops hodgsonii succinyl-CoA ligase [ADP/GDP-forming] subunit alpha, mitochondrial-like (LOC102330027), mRNA	59538	322	894	573	100	0	99.3
Pcub_MSU1_v1_00853_0_4_1	1	1032	Delftia sp. Cs1-4	Bacteria|Proteobacteria|Betaproteobacteria|Burkholderiales|Comamonadaceae|Delftia|Delftia sp. Cs1-4	Bacteria	Proteobacteria	Betaproteobacteria	Burkholderiales	Comamonadaceae	gi|333741867|gb|CP002735.1|	Delftia sp. Cs1-4, complete genome	742013	6373190	6374221	1032	100	0	93.51
Pcub_MSU1_v1_00863_0_0_1	1	726	Acinetobacter oleivorans DR1	Bacteria|Proteobacteria|Gammaproteobacteria|Pseudomonadales|Moraxellaceae|Acinetobacter|Acinetobacter oleivorans|Acinetobacter oleivorans DR1	Bacteria	Proteobacteria	Gammaproteobacteria	Pseudomonadales	Moraxellaceae	gi|298698338|gb|CP002080.1|	Acinetobacter oleivorans DR1, complete genome	436717	3392473	3391748	726	100	0	96.01
Pcub_MSU1_v1_00863_0_2_1	1	678	Acinetobacter oleivorans DR1	Bacteria|Proteobacteria|Gammaproteobacteria|Pseudomonadales|Moraxellaceae|Acinetobacter|Acinetobacter oleivorans|Acinetobacter oleivorans DR1	Bacteria	Proteobacteria	Gammaproteobacteria	Pseudomonadales	Moraxellaceae	gi|298698338|gb|CP002080.1|	Acinetobacter oleivorans DR1, complete genome	436717	3387196	3386519	678	100	0	98.82
Pcub_MSU1_v1_00864_0_1_1	1	2073	Delftia sp. Cs1-4	Bacteria|Proteobacteria|Betaproteobacteria|Burkholderiales|Comamonadaceae|Delftia|Delftia sp. Cs1-4	Bacteria	Proteobacteria	Betaproteobacteria	Burkholderiales	Comamonadaceae	gi|333741867|gb|CP002735.1|	Delftia sp. Cs1-4, complete genome	742013	5532422	5534494	2073	100	0	97.4
Pcub_MSU1_v1_00864_0_3_1	1	1338	Delftia sp. Cs1-4	Bacteria|Proteobacteria|Betaproteobacteria|Burkholderiales|Comamonadaceae|Delftia|Delftia sp. Cs1-4	Bacteria	Proteobacteria	Betaproteobacteria	Burkholderiales	Comamonadaceae	gi|333741867|gb|CP002735.1|	Delftia sp. Cs1-4, complete genome	742013	5536873	5535536	1338	100	0	98.43
Pcub_MSU1_v1_00879_0_1_1	1	825	Acidovorax citrulli AAC00-1	Bacteria|Proteobacteria|Betaproteobacteria|Burkholderiales|Comamonadaceae|Acidovorax|Acidovorax citrulli|Acidovorax citrulli AAC00-1	Bacteria	Proteobacteria	Betaproteobacteria	Burkholderiales	Comamonadaceae	gi|120587178|gb|CP000512.1|	Acidovorax citrulli AAC00-1, complete genome	397945	1197200	1196376	826	100	0	90.19
Pcub_MSU1_v1_00881_0_15_1	1	723	Delftia acidovorans SPH-1	Bacteria|Proteobacteria|Betaproteobacteria|Burkholderiales|Comamonadaceae|Delftia|Delftia acidovorans|Delftia acidovorans SPH-1	Bacteria	Proteobacteria	Betaproteobacteria	Burkholderiales	Comamonadaceae	gi|160361034|gb|CP000884.1|	Delftia acidovorans SPH-1, complete genome	398578	1296734	1297456	723	100	0	96.54
Pcub_MSU1_v1_00881_0_5_1	1	2016	Delftia acidovorans SPH-1	Bacteria|Proteobacteria|Betaproteobacteria|Burkholderiales|Comamonadaceae|Delftia|Delftia acidovorans|Delftia acidovorans SPH-1	Bacteria	Proteobacteria	Betaproteobacteria	Burkholderiales	Comamonadaceae	gi|160361034|gb|CP000884.1|	Delftia acidovorans SPH-1, complete genome	398578	1290343	1288328	2016	100	0	97.12
Pcub_MSU1_v1_00881_0_6_1	1	1209	Delftia sp. Cs1-4	Bacteria|Proteobacteria|Betaproteobacteria|Burkholderiales|Comamonadaceae|Delftia|Delftia sp. Cs1-4	Bacteria	Proteobacteria	Betaproteobacteria	Burkholderiales	Comamonadaceae	gi|333741867|gb|CP002735.1|	Delftia sp. Cs1-4, complete genome	742013	6028330	6029538	1209	100	0	96.69
Pcub_MSU1_v1_00885_0_1_1	1	1467	Acinetobacter calcoaceticus PHEA-2	Bacteria|Proteobacteria|Gammaproteobacteria|Pseudomonadales|Moraxellaceae|Acinetobacter|Acinetobacter calcoaceticus/baumannii complex|Acinetobacter calcoaceticus|Acinetobacter calcoaceticus PHEA-2	Bacteria	Proteobacteria	Gammaproteobacteria	Pseudomonadales	Moraxellaceae	gi|325121063|gb|CP002177.1|	Acinetobacter calcoaceticus PHEA-2, complete genome	871585	2135007	2133541	1467	100	0	95.91
Pcub_MSU1_v1_00893_0_10_1	1	960	Delftia sp. Cs1-4	Bacteria|Proteobacteria|Betaproteobacteria|Burkholderiales|Comamonadaceae|Delftia|Delftia sp. Cs1-4	Bacteria	Proteobacteria	Betaproteobacteria	Burkholderiales	Comamonadaceae	gi|333741867|gb|CP002735.1|	Delftia sp. Cs1-4, complete genome	742013	5932303	5933283	981	100	0	95.92
Pcub_MSU1_v1_00893_0_3_1	1	759	Delftia sp. Cs1-4	Bacteria|Proteobacteria|Betaproteobacteria|Burkholderiales|Comamonadaceae|Delftia|Delftia sp. Cs1-4	Bacteria	Proteobacteria	Betaproteobacteria	Burkholderiales	Comamonadaceae	gi|333741867|gb|CP002735.1|	Delftia sp. Cs1-4, complete genome	742013	5934890	5934132	759	100	0	98.81
Pcub_MSU1_v1_00897_0_0_1	1	1818	Delftia acidovorans SPH-1	Bacteria|Proteobacteria|Betaproteobacteria|Burkholderiales|Comamonadaceae|Delftia|Delftia acidovorans|Delftia acidovorans SPH-1	Bacteria	Proteobacteria	Betaproteobacteria	Burkholderiales	Comamonadaceae	gi|160361034|gb|CP000884.1|	Delftia acidovorans SPH-1, complete genome	398578	497706	495889	1818	100	0	100
Pcub_MSU1_v1_00901_0_0_1	1	1509	Acinetobacter oleivorans DR1	Bacteria|Proteobacteria|Gammaproteobacteria|Pseudomonadales|Moraxellaceae|Acinetobacter|Acinetobacter oleivorans|Acinetobacter oleivorans DR1	Bacteria	Proteobacteria	Gammaproteobacteria	Pseudomonadales	Moraxellaceae	gi|298698338|gb|CP002080.1|	Acinetobacter oleivorans DR1, complete genome	436717	313236	311728	1509	100	0	94.04
Pcub_MSU1_v1_00906_0_1_1	1	585	Acinetobacter oleivorans DR1	Bacteria|Proteobacteria|Gammaproteobacteria|Pseudomonadales|Moraxellaceae|Acinetobacter|Acinetobacter oleivorans|Acinetobacter oleivorans DR1	Bacteria	Proteobacteria	Gammaproteobacteria	Pseudomonadales	Moraxellaceae	gi|298698338|gb|CP002080.1|	Acinetobacter oleivorans DR1, complete genome	436717	1152350	1151766	585	100	0	95.38
Pcub_MSU1_v1_00915_0_5_1	1	1083	Delftia sp. Cs1-4	Bacteria|Proteobacteria|Betaproteobacteria|Burkholderiales|Comamonadaceae|Delftia|Delftia sp. Cs1-4	Bacteria	Proteobacteria	Betaproteobacteria	Burkholderiales	Comamonadaceae	gi|333741867|gb|CP002735.1|	Delftia sp. Cs1-4, complete genome	742013	6435787	6434705	1083	100	0	98.25
Pcub_MSU1_v1_00915_0_6_1	1	789	Delftia sp. Cs1-4	Bacteria|Proteobacteria|Betaproteobacteria|Burkholderiales|Comamonadaceae|Delftia|Delftia sp. Cs1-4	Bacteria	Proteobacteria	Betaproteobacteria	Burkholderiales	Comamonadaceae	gi|333741867|gb|CP002735.1|	Delftia sp. Cs1-4, complete genome	742013	6437156	6436368	789	100	0	98.23
Pcub_MSU1_v1_00927_0_0_1	1	1659	Acinetobacter oleivorans DR1	Bacteria|Proteobacteria|Gammaproteobacteria|Pseudomonadales|Moraxellaceae|Acinetobacter|Acinetobacter oleivorans|Acinetobacter oleivorans DR1	Bacteria	Proteobacteria	Gammaproteobacteria	Pseudomonadales	Moraxellaceae	gi|298698338|gb|CP002080.1|	Acinetobacter oleivorans DR1, complete genome	436717	3148087	3149745	1659	100	0	93.01
Pcub_MSU1_v1_00927_0_5_1	1	1278	Acinetobacter baumannii	Bacteria|Proteobacteria|Gammaproteobacteria|Pseudomonadales|Moraxellaceae|Acinetobacter|Acinetobacter calcoaceticus/baumannii complex|Acinetobacter baumannii	Bacteria	Proteobacteria	Gammaproteobacteria	Pseudomonadales	Moraxellaceae	gi|742926533|gb|CP010368.1|	Acinetobacter baumannii strain 6411, complete genome	470	2876897	2878174	1278	100	0	91.63
Pcub_MSU1_v1_00932_0_0_1	1	873	Acinetobacter oleivorans DR1	Bacteria|Proteobacteria|Gammaproteobacteria|Pseudomonadales|Moraxellaceae|Acinetobacter|Acinetobacter oleivorans|Acinetobacter oleivorans DR1	Bacteria	Proteobacteria	Gammaproteobacteria	Pseudomonadales	Moraxellaceae	gi|298698338|gb|CP002080.1|	Acinetobacter oleivorans DR1, complete genome	436717	963480	962608	873	100	0	91.87
Pcub_MSU1_v1_00969_0_0_1	1	498	Acinetobacter oleivorans DR1	Bacteria|Proteobacteria|Gammaproteobacteria|Pseudomonadales|Moraxellaceae|Acinetobacter|Acinetobacter oleivorans|Acinetobacter oleivorans DR1	Bacteria	Proteobacteria	Gammaproteobacteria	Pseudomonadales	Moraxellaceae	gi|298698338|gb|CP002080.1|	Acinetobacter oleivorans DR1, complete genome	436717	461807	462304	498	100	0	99.2
Pcub_MSU1_v1_00969_0_1_1	1	441	Acinetobacter oleivorans DR1	Bacteria|Proteobacteria|Gammaproteobacteria|Pseudomonadales|Moraxellaceae|Acinetobacter|Acinetobacter oleivorans|Acinetobacter oleivorans DR1	Bacteria	Proteobacteria	Gammaproteobacteria	Pseudomonadales	Moraxellaceae	gi|298698338|gb|CP002080.1|	Acinetobacter oleivorans DR1, complete genome	436717	462491	462931	441	100	0	99.09
Pcub_MSU1_v1_00969_0_2_1	1	378	Acinetobacter sp. C42	Bacteria|Proteobacteria|Gammaproteobacteria|Pseudomonadales|Moraxellaceae|Acinetobacter|Acinetobacter sp. C42	Bacteria	Proteobacteria	Gammaproteobacteria	Pseudomonadales	Moraxellaceae	gi|343966363|gb|JF701984.1|	Acinetobacter sp. C42 RpoA (rpoA), RplQ (rplQ), AliD (aliD), acyl-coenzyme A dehydrogenase, and hypothetical protein genes, complete cds; and 3-hydroxyacyl-COA dehydrogenase gene, partial cds	991790	1066	1443	378	100	0	99.47
Pcub_MSU1_v1_00979_0_0_1	1	1206	Delftia acidovorans SPH-1	Bacteria|Proteobacteria|Betaproteobacteria|Burkholderiales|Comamonadaceae|Delftia|Delftia acidovorans|Delftia acidovorans SPH-1	Bacteria	Proteobacteria	Betaproteobacteria	Burkholderiales	Comamonadaceae	gi|160361034|gb|CP000884.1|	Delftia acidovorans SPH-1, complete genome	398578	6730445	6731650	1206	100	0	97.84
Pcub_MSU1_v1_00979_0_3_1	1	1344	Delftia sp. Cs1-4	Bacteria|Proteobacteria|Betaproteobacteria|Burkholderiales|Comamonadaceae|Delftia|Delftia sp. Cs1-4	Bacteria	Proteobacteria	Betaproteobacteria	Burkholderiales	Comamonadaceae	gi|333741867|gb|CP002735.1|	Delftia sp. Cs1-4, complete genome	742013	6644990	6646348	1359	100	0	97.06
Pcub_MSU1_v1_00981_0_0_1	1	2886	Delftia acidovorans SPH-1	Bacteria|Proteobacteria|Betaproteobacteria|Burkholderiales|Comamonadaceae|Delftia|Delftia acidovorans|Delftia acidovorans SPH-1	Bacteria	Proteobacteria	Betaproteobacteria	Burkholderiales	Comamonadaceae	gi|160361034|gb|CP000884.1|	Delftia acidovorans SPH-1, complete genome	398578	2693864	2696749	2886	100	0	98.82
Pcub_MSU1_v1_00981_0_3_1	1	1704	Delftia sp. Cs1-4	Bacteria|Proteobacteria|Betaproteobacteria|Burkholderiales|Comamonadaceae|Delftia|Delftia sp. Cs1-4	Bacteria	Proteobacteria	Betaproteobacteria	Burkholderiales	Comamonadaceae	gi|333741867|gb|CP002735.1|	Delftia sp. Cs1-4, complete genome	742013	4767140	4765437	1704	100	0	98.65
Pcub_MSU1_v1_00985_0_0_1	1	885	Delftia acidovorans SPH-1	Bacteria|Proteobacteria|Betaproteobacteria|Burkholderiales|Comamonadaceae|Delftia|Delftia acidovorans|Delftia acidovorans SPH-1	Bacteria	Proteobacteria	Betaproteobacteria	Burkholderiales	Comamonadaceae	gi|160361034|gb|CP000884.1|	Delftia acidovorans SPH-1, complete genome	398578	4712290	4711406	885	100	0	98.76
Pcub_MSU1_v1_00986_0_0_1	1	597	Delftia sp. Cs1-4	Bacteria|Proteobacteria|Betaproteobacteria|Burkholderiales|Comamonadaceae|Delftia|Delftia sp. Cs1-4	Bacteria	Proteobacteria	Betaproteobacteria	Burkholderiales	Comamonadaceae	gi|333741867|gb|CP002735.1|	Delftia sp. Cs1-4, complete genome	742013	3246191	3246787	597	100	0	98.32
Pcub_MSU1_v1_00987_0_0_1	1	366	Delftia acidovorans SPH-1	Bacteria|Proteobacteria|Betaproteobacteria|Burkholderiales|Comamonadaceae|Delftia|Delftia acidovorans|Delftia acidovorans SPH-1	Bacteria	Proteobacteria	Betaproteobacteria	Burkholderiales	Comamonadaceae	gi|160361034|gb|CP000884.1|	Delftia acidovorans SPH-1, complete genome	398578	92531	92166	366	100	0	99.18
Pcub_MSU1_v1_00987_0_2_1	1	1287	Delftia acidovorans SPH-1	Bacteria|Proteobacteria|Betaproteobacteria|Burkholderiales|Comamonadaceae|Delftia|Delftia acidovorans|Delftia acidovorans SPH-1	Bacteria	Proteobacteria	Betaproteobacteria	Burkholderiales	Comamonadaceae	gi|160361034|gb|CP000884.1|	Delftia acidovorans SPH-1, complete genome	398578	82427	81141	1287	100	0	98.83
Pcub_MSU1_v1_00987_0_3_1	1	1575	Delftia acidovorans SPH-1	Bacteria|Proteobacteria|Betaproteobacteria|Burkholderiales|Comamonadaceae|Delftia|Delftia acidovorans|Delftia acidovorans SPH-1	Bacteria	Proteobacteria	Betaproteobacteria	Burkholderiales	Comamonadaceae	gi|160361034|gb|CP000884.1|	Delftia acidovorans SPH-1, complete genome	398578	83692	85266	1575	100	0	99.3
Pcub_MSU1_v1_00988_0_2_1	1	1335	Delftia sp. Cs1-4	Bacteria|Proteobacteria|Betaproteobacteria|Burkholderiales|Comamonadaceae|Delftia|Delftia sp. Cs1-4	Bacteria	Proteobacteria	Betaproteobacteria	Burkholderiales	Comamonadaceae	gi|333741867|gb|CP002735.1|	Delftia sp. Cs1-4, complete genome	742013	4700716	4702049	1335	100	0	98.65
Pcub_MSU1_v1_00994_0_1_1	1	1392	Acinetobacter oleivorans DR1	Bacteria|Proteobacteria|Gammaproteobacteria|Pseudomonadales|Moraxellaceae|Acinetobacter|Acinetobacter oleivorans|Acinetobacter oleivorans DR1	Bacteria	Proteobacteria	Gammaproteobacteria	Pseudomonadales	Moraxellaceae	gi|298698338|gb|CP002080.1|	Acinetobacter oleivorans DR1, complete genome	436717	1950204	1951595	1392	100	0	90.23
Pcub_MSU1_v1_00994_0_3_1	1	1083	Acinetobacter oleivorans DR1	Bacteria|Proteobacteria|Gammaproteobacteria|Pseudomonadales|Moraxellaceae|Acinetobacter|Acinetobacter oleivorans|Acinetobacter oleivorans DR1	Bacteria	Proteobacteria	Gammaproteobacteria	Pseudomonadales	Moraxellaceae	gi|298698338|gb|CP002080.1|	Acinetobacter oleivorans DR1, complete genome	436717	1947391	1948473	1083	100	0	91.78
Pcub_MSU1_v1_01012_0_2_1	1	1293	Pantholops hodgsonii	Eukaryota|Opisthokonta|Metazoa|Eumetazoa|Bilateria|Deuterostomia|Chordata|Craniata|Vertebrata|Gnathostomata|Teleostomi|Euteleostomi|Sarcopterygii|Dipnotetrapodomorpha|Tetrapoda|Amniota|Mammalia|Theria|Eutheria|Boreoeutheria|Laurasiatheria|Cetartiodactyla|Ruminantia|Pecora|Bovidae|Antilopinae|Pantholops|Pantholops hodgsonii	Eukaryota	Opisthokonta	Metazoa	Eumetazoa	Bilateria	gi|556768952|ref|XM_005979625.1|	PREDICTED: Pantholops hodgsonii flavohemoprotein-like (LOC102340995), mRNA	59538	1	1293	1293	100	0	99.54
Pcub_MSU1_v1_01015_0_4_1	1	1176	Acinetobacter oleivorans DR1	Bacteria|Proteobacteria|Gammaproteobacteria|Pseudomonadales|Moraxellaceae|Acinetobacter|Acinetobacter oleivorans|Acinetobacter oleivorans DR1	Bacteria	Proteobacteria	Gammaproteobacteria	Pseudomonadales	Moraxellaceae	gi|298698338|gb|CP002080.1|	Acinetobacter oleivorans DR1, complete genome	436717	170595	171761	1176	100	0	96.09
Pcub_MSU1_v1_01021_0_3_1	1	1407	Acinetobacter oleivorans DR1	Bacteria|Proteobacteria|Gammaproteobacteria|Pseudomonadales|Moraxellaceae|Acinetobacter|Acinetobacter oleivorans|Acinetobacter oleivorans DR1	Bacteria	Proteobacteria	Gammaproteobacteria	Pseudomonadales	Moraxellaceae	gi|298698338|gb|CP002080.1|	Acinetobacter oleivorans DR1, complete genome	436717	912803	914209	1407	100	0	93.03
Pcub_MSU1_v1_01021_0_4_1	1	1251	Acinetobacter oleivorans DR1	Bacteria|Proteobacteria|Gammaproteobacteria|Pseudomonadales|Moraxellaceae|Acinetobacter|Acinetobacter oleivorans|Acinetobacter oleivorans DR1	Bacteria	Proteobacteria	Gammaproteobacteria	Pseudomonadales	Moraxellaceae	gi|298698338|gb|CP002080.1|	Acinetobacter oleivorans DR1, complete genome	436717	914594	915844	1251	100	0	93.45
Pcub_MSU1_v1_01022_0_0_1	1	1155	Acinetobacter oleivorans DR1	Bacteria|Proteobacteria|Gammaproteobacteria|Pseudomonadales|Moraxellaceae|Acinetobacter|Acinetobacter oleivorans|Acinetobacter oleivorans DR1	Bacteria	Proteobacteria	Gammaproteobacteria	Pseudomonadales	Moraxellaceae	gi|298698338|gb|CP002080.1|	Acinetobacter oleivorans DR1, complete genome	436717	122633	121479	1156	100	0	90.48
Pcub_MSU1_v1_01022_0_2_1	1	1026	Acinetobacter oleivorans DR1	Bacteria|Proteobacteria|Gammaproteobacteria|Pseudomonadales|Moraxellaceae|Acinetobacter|Acinetobacter oleivorans|Acinetobacter oleivorans DR1	Bacteria	Proteobacteria	Gammaproteobacteria	Pseudomonadales	Moraxellaceae	gi|298698338|gb|CP002080.1|	Acinetobacter oleivorans DR1, complete genome	436717	116924	115899	1026	100	0	91.42
Pcub_MSU1_v1_01024_0_3_1	1	1245	Acidovorax avenae subsp. avenae ATCC 19860	Bacteria|Proteobacteria|Betaproteobacteria|Burkholderiales|Comamonadaceae|Acidovorax|Acidovorax avenae|Acidovorax avenae subsp. avenae|Acidovorax avenae subsp. avenae ATCC 19860	Bacteria	Proteobacteria	Betaproteobacteria	Burkholderiales	Comamonadaceae	gi|323371659|gb|CP002521.1|	Acidovorax avenae subsp. avenae ATCC 19860, complete genome	643561	2574712	2573468	1245	100	0	92.21
Pcub_MSU1_v1_01028_0_0_1	1	885	Acinetobacter oleivorans DR1	Bacteria|Proteobacteria|Gammaproteobacteria|Pseudomonadales|Moraxellaceae|Acinetobacter|Acinetobacter oleivorans|Acinetobacter oleivorans DR1	Bacteria	Proteobacteria	Gammaproteobacteria	Pseudomonadales	Moraxellaceae	gi|298698338|gb|CP002080.1|	Acinetobacter oleivorans DR1, complete genome	436717	4047317	4046433	885	100	0	95.82
Pcub_MSU1_v1_01028_0_1_1	1	2607	Acinetobacter baumannii	Bacteria|Proteobacteria|Gammaproteobacteria|Pseudomonadales|Moraxellaceae|Acinetobacter|Acinetobacter calcoaceticus/baumannii complex|Acinetobacter baumannii	Bacteria	Proteobacteria	Gammaproteobacteria	Pseudomonadales	Moraxellaceae	gi|742926533|gb|CP010368.1|	Acinetobacter baumannii strain 6411, complete genome	470	3754104	3751498	2607	100	0	94.86
Pcub_MSU1_v1_01028_0_1_2	1	1158	Acinetobacter baumannii	Bacteria|Proteobacteria|Gammaproteobacteria|Pseudomonadales|Moraxellaceae|Acinetobacter|Acinetobacter calcoaceticus/baumannii complex|Acinetobacter baumannii	Bacteria	Proteobacteria	Gammaproteobacteria	Pseudomonadales	Moraxellaceae	gi|742926533|gb|CP010368.1|	Acinetobacter baumannii strain 6411, complete genome	470	3755261	3754104	1158	100	0	93.18
Pcub_MSU1_v1_01031_0_0_1	1	927	Acinetobacter oleivorans DR1	Bacteria|Proteobacteria|Gammaproteobacteria|Pseudomonadales|Moraxellaceae|Acinetobacter|Acinetobacter oleivorans|Acinetobacter oleivorans DR1	Bacteria	Proteobacteria	Gammaproteobacteria	Pseudomonadales	Moraxellaceae	gi|298698338|gb|CP002080.1|	Acinetobacter oleivorans DR1, complete genome	436717	565929	565003	927	100	0	97.95
Pcub_MSU1_v1_01039_0_0_1	1	1938	Pantholops hodgsonii	Eukaryota|Opisthokonta|Metazoa|Eumetazoa|Bilateria|Deuterostomia|Chordata|Craniata|Vertebrata|Gnathostomata|Teleostomi|Euteleostomi|Sarcopterygii|Dipnotetrapodomorpha|Tetrapoda|Amniota|Mammalia|Theria|Eutheria|Boreoeutheria|Laurasiatheria|Cetartiodactyla|Ruminantia|Pecora|Bovidae|Antilopinae|Pantholops|Pantholops hodgsonii	Eukaryota	Opisthokonta	Metazoa	Eumetazoa	Bilateria	gi|556762820|ref|XM_005976641.1|	PREDICTED: Pantholops hodgsonii ABC transporter B family member 27-like (LOC102328986), mRNA	59538	67	2004	1938	100	0	97.47
Pcub_MSU1_v1_01041_0_4_1	1	1761	Delftia acidovorans SPH-1	Bacteria|Proteobacteria|Betaproteobacteria|Burkholderiales|Comamonadaceae|Delftia|Delftia acidovorans|Delftia acidovorans SPH-1	Bacteria	Proteobacteria	Betaproteobacteria	Burkholderiales	Comamonadaceae	gi|160361034|gb|CP000884.1|	Delftia acidovorans SPH-1, complete genome	398578	822775	824520	1761	100	0	92.05
Pcub_MSU1_v1_01041_0_5_1	1	789	Delftia sp. Cs1-4	Bacteria|Proteobacteria|Betaproteobacteria|Burkholderiales|Comamonadaceae|Delftia|Delftia sp. Cs1-4	Bacteria	Proteobacteria	Betaproteobacteria	Burkholderiales	Comamonadaceae	gi|333741867|gb|CP002735.1|	Delftia sp. Cs1-4, complete genome	742013	6517864	6517075	793	100	0	93.57
Pcub_MSU1_v1_01055_0_0_1	1	894	Acinetobacter oleivorans DR1	Bacteria|Proteobacteria|Gammaproteobacteria|Pseudomonadales|Moraxellaceae|Acinetobacter|Acinetobacter oleivorans|Acinetobacter oleivorans DR1	Bacteria	Proteobacteria	Gammaproteobacteria	Pseudomonadales	Moraxellaceae	gi|298698338|gb|CP002080.1|	Acinetobacter oleivorans DR1, complete genome	436717	2912998	2913891	894	100	0	90.04
Pcub_MSU1_v1_01069_0_0_1	1	2298	Delftia sp. Cs1-4	Bacteria|Proteobacteria|Betaproteobacteria|Burkholderiales|Comamonadaceae|Delftia|Delftia sp. Cs1-4	Bacteria	Proteobacteria	Betaproteobacteria	Burkholderiales	Comamonadaceae	gi|333741867|gb|CP002735.1|	Delftia sp. Cs1-4, complete genome	742013	2155250	2157547	2298	100	0	96.04
Pcub_MSU1_v1_01069_0_3_1	1	855	Delftia acidovorans SPH-1	Bacteria|Proteobacteria|Betaproteobacteria|Burkholderiales|Comamonadaceae|Delftia|Delftia acidovorans|Delftia acidovorans SPH-1	Bacteria	Proteobacteria	Betaproteobacteria	Burkholderiales	Comamonadaceae	gi|160361034|gb|CP000884.1|	Delftia acidovorans SPH-1, complete genome	398578	5466169	5465315	855	100	0	91.81
Pcub_MSU1_v1_01069_0_4_1	1	699	Pantholops hodgsonii	Eukaryota|Opisthokonta|Metazoa|Eumetazoa|Bilateria|Deuterostomia|Chordata|Craniata|Vertebrata|Gnathostomata|Teleostomi|Euteleostomi|Sarcopterygii|Dipnotetrapodomorpha|Tetrapoda|Amniota|Mammalia|Theria|Eutheria|Boreoeutheria|Laurasiatheria|Cetartiodactyla|Ruminantia|Pecora|Bovidae|Antilopinae|Pantholops|Pantholops hodgsonii	Eukaryota	Opisthokonta	Metazoa	Eumetazoa	Bilateria	gi|556757606|ref|XM_005974083.1|	PREDICTED: Pantholops hodgsonii dehydrodolichyl diphosphate synthase 2-like (LOC102315307), mRNA	59538	1	699	699	100	0	99.71
Pcub_MSU1_v1_01069_0_5_1	1	561	Pantholops hodgsonii	Eukaryota|Opisthokonta|Metazoa|Eumetazoa|Bilateria|Deuterostomia|Chordata|Craniata|Vertebrata|Gnathostomata|Teleostomi|Euteleostomi|Sarcopterygii|Dipnotetrapodomorpha|Tetrapoda|Amniota|Mammalia|Theria|Eutheria|Boreoeutheria|Laurasiatheria|Cetartiodactyla|Ruminantia|Pecora|Bovidae|Antilopinae|Pantholops|Pantholops hodgsonii	Eukaryota	Opisthokonta	Metazoa	Eumetazoa	Bilateria	gi|556757604|ref|XM_005974082.1|	PREDICTED: Pantholops hodgsonii ribosome-recycling factor, chloroplastic-like (LOC102314953), mRNA	59538	1	561	561	100	0	100
Pcub_MSU1_v1_01069_0_6_1	1	723	Delftia sp. Cs1-4	Bacteria|Proteobacteria|Betaproteobacteria|Burkholderiales|Comamonadaceae|Delftia|Delftia sp. Cs1-4	Bacteria	Proteobacteria	Betaproteobacteria	Burkholderiales	Comamonadaceae	gi|333741867|gb|CP002735.1|	Delftia sp. Cs1-4, complete genome	742013	2149600	2150322	723	100	0	92.67
Pcub_MSU1_v1_01071_0_1_1	1	621	Acinetobacter oleivorans DR1	Bacteria|Proteobacteria|Gammaproteobacteria|Pseudomonadales|Moraxellaceae|Acinetobacter|Acinetobacter oleivorans|Acinetobacter oleivorans DR1	Bacteria	Proteobacteria	Gammaproteobacteria	Pseudomonadales	Moraxellaceae	gi|298698338|gb|CP002080.1|	Acinetobacter oleivorans DR1, complete genome	436717	3458167	3457547	621	100	0	90.98
Pcub_MSU1_v1_01071_0_2_1	1	531	Acinetobacter calcoaceticus PHEA-2	Bacteria|Proteobacteria|Gammaproteobacteria|Pseudomonadales|Moraxellaceae|Acinetobacter|Acinetobacter calcoaceticus/baumannii complex|Acinetobacter calcoaceticus|Acinetobacter calcoaceticus PHEA-2	Bacteria	Proteobacteria	Gammaproteobacteria	Pseudomonadales	Moraxellaceae	gi|325121063|gb|CP002177.1|	Acinetobacter calcoaceticus PHEA-2, complete genome	871585	3806947	3807477	531	100	0	91.53
Pcub_MSU1_v1_01076_0_12_1	1	216	Stenotrophomonas maltophilia D457	Bacteria|Proteobacteria|Gammaproteobacteria|Xanthomonadales|Xanthomonadaceae|Stenotrophomonas|Stenotrophomonas maltophilia group|Stenotrophomonas maltophilia|Stenotrophomonas maltophilia D457	Bacteria	Proteobacteria	Gammaproteobacteria	Xanthomonadales	Xanthomonadaceae	gi|384076029|emb|HE798556.1|	Stenotrophomonas maltophilia D457 complete genome	1163399	903282	903497	216	100	7e-108	100
Pcub_MSU1_v1_01076_0_13_1	1	342	Stenotrophomonas maltophilia D457	Bacteria|Proteobacteria|Gammaproteobacteria|Xanthomonadales|Xanthomonadaceae|Stenotrophomonas|Stenotrophomonas maltophilia group|Stenotrophomonas maltophilia|Stenotrophomonas maltophilia D457	Bacteria	Proteobacteria	Gammaproteobacteria	Xanthomonadales	Xanthomonadaceae	gi|384076029|emb|HE798556.1|	Stenotrophomonas maltophilia D457 complete genome	1163399	903504	903845	342	100	1e-177	100
Pcub_MSU1_v1_01086_0_0_1	1	1176	Stenotrophomonas maltophilia D457	Bacteria|Proteobacteria|Gammaproteobacteria|Xanthomonadales|Xanthomonadaceae|Stenotrophomonas|Stenotrophomonas maltophilia group|Stenotrophomonas maltophilia|Stenotrophomonas maltophilia D457	Bacteria	Proteobacteria	Gammaproteobacteria	Xanthomonadales	Xanthomonadaceae	gi|384076029|emb|HE798556.1|	Stenotrophomonas maltophilia D457 complete genome	1163399	2678336	2677161	1176	100	0	99.49
Pcub_MSU1_v1_01086_0_3_1	1	6390	Stenotrophomonas maltophilia D457	Bacteria|Proteobacteria|Gammaproteobacteria|Xanthomonadales|Xanthomonadaceae|Stenotrophomonas|Stenotrophomonas maltophilia group|Stenotrophomonas maltophilia|Stenotrophomonas maltophilia D457	Bacteria	Proteobacteria	Gammaproteobacteria	Xanthomonadales	Xanthomonadaceae	gi|384076029|emb|HE798556.1|	Stenotrophomonas maltophilia D457 complete genome	1163399	2676901	2670512	6390	100	0	99.09
Pcub_MSU1_v1_01097_0_1_1	1	210	Pseudoxanthomonas suwonensis 11-1	Bacteria|Proteobacteria|Gammaproteobacteria|Xanthomonadales|Xanthomonadaceae|Pseudoxanthomonas|Pseudoxanthomonas suwonensis|Pseudoxanthomonas suwonensis 11-1	Bacteria	Proteobacteria	Gammaproteobacteria	Xanthomonadales	Xanthomonadaceae	gi|317464132|gb|CP002446.1|	Pseudoxanthomonas suwonensis 11-1, complete genome	743721	1142135	1141926	210	100	8e-73	90.95
Pcub_MSU1_v1_01101_0_1_1	1	1245	Pantholops hodgsonii	Eukaryota|Opisthokonta|Metazoa|Eumetazoa|Bilateria|Deuterostomia|Chordata|Craniata|Vertebrata|Gnathostomata|Teleostomi|Euteleostomi|Sarcopterygii|Dipnotetrapodomorpha|Tetrapoda|Amniota|Mammalia|Theria|Eutheria|Boreoeutheria|Laurasiatheria|Cetartiodactyla|Ruminantia|Pecora|Bovidae|Antilopinae|Pantholops|Pantholops hodgsonii	Eukaryota	Opisthokonta	Metazoa	Eumetazoa	Bilateria	gi|556740176|ref|XM_005965573.1|	PREDICTED: Pantholops hodgsonii 3-oxoacyl-[acyl-carrier-protein] synthase, mitochondrial-like (LOC102336689), mRNA	59538	1	1245	1245	100	0	99.84
Pcub_MSU1_v1_01113_0_3_1	1	1779	Delftia sp. Cs1-4	Bacteria|Proteobacteria|Betaproteobacteria|Burkholderiales|Comamonadaceae|Delftia|Delftia sp. Cs1-4	Bacteria	Proteobacteria	Betaproteobacteria	Burkholderiales	Comamonadaceae	gi|333741867|gb|CP002735.1|	Delftia sp. Cs1-4, complete genome	742013	453883	455658	1779	100	0	92.97
Pcub_MSU1_v1_01121_0_0_1	1	4215	Stenotrophomonas maltophilia D457	Bacteria|Proteobacteria|Gammaproteobacteria|Xanthomonadales|Xanthomonadaceae|Stenotrophomonas|Stenotrophomonas maltophilia group|Stenotrophomonas maltophilia|Stenotrophomonas maltophilia D457	Bacteria	Proteobacteria	Gammaproteobacteria	Xanthomonadales	Xanthomonadaceae	gi|384076029|emb|HE798556.1|	Stenotrophomonas maltophilia D457 complete genome	1163399	3344437	3340223	4215	100	0	99.15
Pcub_MSU1_v1_01132_0_3_1	1	1818	Acinetobacter oleivorans DR1	Bacteria|Proteobacteria|Gammaproteobacteria|Pseudomonadales|Moraxellaceae|Acinetobacter|Acinetobacter oleivorans|Acinetobacter oleivorans DR1	Bacteria	Proteobacteria	Gammaproteobacteria	Pseudomonadales	Moraxellaceae	gi|298698338|gb|CP002080.1|	Acinetobacter oleivorans DR1, complete genome	436717	997607	999424	1818	100	0	94.72
Pcub_MSU1_v1_01134_0_2_1	1	1299	Acinetobacter oleivorans DR1	Bacteria|Proteobacteria|Gammaproteobacteria|Pseudomonadales|Moraxellaceae|Acinetobacter|Acinetobacter oleivorans|Acinetobacter oleivorans DR1	Bacteria	Proteobacteria	Gammaproteobacteria	Pseudomonadales	Moraxellaceae	gi|298698338|gb|CP002080.1|	Acinetobacter oleivorans DR1, complete genome	436717	1401890	1403188	1299	100	0	91.15
Pcub_MSU1_v1_01134_0_3_1	1	729	Acinetobacter calcoaceticus PHEA-2	Bacteria|Proteobacteria|Gammaproteobacteria|Pseudomonadales|Moraxellaceae|Acinetobacter|Acinetobacter calcoaceticus/baumannii complex|Acinetobacter calcoaceticus|Acinetobacter calcoaceticus PHEA-2	Bacteria	Proteobacteria	Gammaproteobacteria	Pseudomonadales	Moraxellaceae	gi|325121063|gb|CP002177.1|	Acinetobacter calcoaceticus PHEA-2, complete genome	871585	1754338	1753610	729	100	0	90.12
Pcub_MSU1_v1_01137_0_0_1	1	339	Acinetobacter calcoaceticus PHEA-2	Bacteria|Proteobacteria|Gammaproteobacteria|Pseudomonadales|Moraxellaceae|Acinetobacter|Acinetobacter calcoaceticus/baumannii complex|Acinetobacter calcoaceticus|Acinetobacter calcoaceticus PHEA-2	Bacteria	Proteobacteria	Gammaproteobacteria	Pseudomonadales	Moraxellaceae	gi|325121063|gb|CP002177.1|	Acinetobacter calcoaceticus PHEA-2, complete genome	871585	233449	233787	339	100	1e-147	94.99
Pcub_MSU1_v1_01142_0_2_1	1	1080	Acinetobacter oleivorans DR1	Bacteria|Proteobacteria|Gammaproteobacteria|Pseudomonadales|Moraxellaceae|Acinetobacter|Acinetobacter oleivorans|Acinetobacter oleivorans DR1	Bacteria	Proteobacteria	Gammaproteobacteria	Pseudomonadales	Moraxellaceae	gi|298698338|gb|CP002080.1|	Acinetobacter oleivorans DR1, complete genome	436717	3690724	3689645	1080	100	0	94.35
Pcub_MSU1_v1_01146_0_5_1	1	882	Delftia acidovorans SPH-1	Bacteria|Proteobacteria|Betaproteobacteria|Burkholderiales|Comamonadaceae|Delftia|Delftia acidovorans|Delftia acidovorans SPH-1	Bacteria	Proteobacteria	Betaproteobacteria	Burkholderiales	Comamonadaceae	gi|160361034|gb|CP000884.1|	Delftia acidovorans SPH-1, complete genome	398578	5939500	5938619	882	100	0	97.17
Pcub_MSU1_v1_01152_0_0_1	1	828	Stenotrophomonas maltophilia D457	Bacteria|Proteobacteria|Gammaproteobacteria|Xanthomonadales|Xanthomonadaceae|Stenotrophomonas|Stenotrophomonas maltophilia group|Stenotrophomonas maltophilia|Stenotrophomonas maltophilia D457	Bacteria	Proteobacteria	Gammaproteobacteria	Xanthomonadales	Xanthomonadaceae	gi|384076029|emb|HE798556.1|	Stenotrophomonas maltophilia D457 complete genome	1163399	4299586	4298759	828	100	0	99.28
Pcub_MSU1_v1_01160_0_0_1	1	1917	Acinetobacter oleivorans DR1	Bacteria|Proteobacteria|Gammaproteobacteria|Pseudomonadales|Moraxellaceae|Acinetobacter|Acinetobacter oleivorans|Acinetobacter oleivorans DR1	Bacteria	Proteobacteria	Gammaproteobacteria	Pseudomonadales	Moraxellaceae	gi|298698338|gb|CP002080.1|	Acinetobacter oleivorans DR1, complete genome	436717	2783184	2781268	1917	100	0	91.44
Pcub_MSU1_v1_01160_0_1_1	1	600	Acinetobacter oleivorans DR1	Bacteria|Proteobacteria|Gammaproteobacteria|Pseudomonadales|Moraxellaceae|Acinetobacter|Acinetobacter oleivorans|Acinetobacter oleivorans DR1	Bacteria	Proteobacteria	Gammaproteobacteria	Pseudomonadales	Moraxellaceae	gi|298698338|gb|CP002080.1|	Acinetobacter oleivorans DR1, complete genome	436717	2779982	2779383	600	100	0	91.5
Pcub_MSU1_v1_01185_0_1_1	1	339	Delftia sp. Cs1-4	Bacteria|Proteobacteria|Betaproteobacteria|Burkholderiales|Comamonadaceae|Delftia|Delftia sp. Cs1-4	Bacteria	Proteobacteria	Betaproteobacteria	Burkholderiales	Comamonadaceae	gi|333741867|gb|CP002735.1|	Delftia sp. Cs1-4, complete genome	742013	1175569	1175907	339	100	5e-161	97.35
Pcub_MSU1_v1_01185_0_4_1	1	828	Delftia sp. Cs1-4	Bacteria|Proteobacteria|Betaproteobacteria|Burkholderiales|Comamonadaceae|Delftia|Delftia sp. Cs1-4	Bacteria	Proteobacteria	Betaproteobacteria	Burkholderiales	Comamonadaceae	gi|333741867|gb|CP002735.1|	Delftia sp. Cs1-4, complete genome	742013	1175183	1174356	828	100	0	95.53
Pcub_MSU1_v1_01195_0_4_1	1	819	Delftia acidovorans SPH-1	Bacteria|Proteobacteria|Betaproteobacteria|Burkholderiales|Comamonadaceae|Delftia|Delftia acidovorans|Delftia acidovorans SPH-1	Bacteria	Proteobacteria	Betaproteobacteria	Burkholderiales	Comamonadaceae	gi|160361034|gb|CP000884.1|	Delftia acidovorans SPH-1, complete genome	398578	1079440	1080258	819	100	0	96.09
Pcub_MSU1_v1_01195_0_5_1	1	588	Delftia sp. HT23	Bacteria|Proteobacteria|Betaproteobacteria|Burkholderiales|Comamonadaceae|Delftia|Delftia sp. HT23	Bacteria	Proteobacteria	Betaproteobacteria	Burkholderiales	Comamonadaceae	gi|183227666|dbj|AB433986.1|	Delftia sp. HT23 dthadh gene for D-threo-3-hydroxyaspartate dehydratase, complete cds	518882	1	588	588	100	0	96.94
Pcub_MSU1_v1_01196_0_0_1	1	1233	Pantholops hodgsonii	Eukaryota|Opisthokonta|Metazoa|Eumetazoa|Bilateria|Deuterostomia|Chordata|Craniata|Vertebrata|Gnathostomata|Teleostomi|Euteleostomi|Sarcopterygii|Dipnotetrapodomorpha|Tetrapoda|Amniota|Mammalia|Theria|Eutheria|Boreoeutheria|Laurasiatheria|Cetartiodactyla|Ruminantia|Pecora|Bovidae|Antilopinae|Pantholops|Pantholops hodgsonii	Eukaryota	Opisthokonta	Metazoa	Eumetazoa	Bilateria	gi|556761801|ref|XM_005976143.1|	PREDICTED: Pantholops hodgsonii arginine biosynthesis bifunctional protein ArgJ, mitochondrial-like (LOC102332551), mRNA	59538	1	1233	1233	100	0	97.4
Pcub_MSU1_v1_01210_0_0_1	1	618	Acinetobacter oleivorans DR1	Bacteria|Proteobacteria|Gammaproteobacteria|Pseudomonadales|Moraxellaceae|Acinetobacter|Acinetobacter oleivorans|Acinetobacter oleivorans DR1	Bacteria	Proteobacteria	Gammaproteobacteria	Pseudomonadales	Moraxellaceae	gi|298698338|gb|CP002080.1|	Acinetobacter oleivorans DR1, complete genome	436717	279791	279174	618	100	0	95.95
Pcub_MSU1_v1_01220_0_0_1	1	837	Acinetobacter oleivorans DR1	Bacteria|Proteobacteria|Gammaproteobacteria|Pseudomonadales|Moraxellaceae|Acinetobacter|Acinetobacter oleivorans|Acinetobacter oleivorans DR1	Bacteria	Proteobacteria	Gammaproteobacteria	Pseudomonadales	Moraxellaceae	gi|298698338|gb|CP002080.1|	Acinetobacter oleivorans DR1, complete genome	436717	3259463	3260299	837	100	0	97.13
Pcub_MSU1_v1_01220_0_1_1	1	579	Acinetobacter oleivorans DR1	Bacteria|Proteobacteria|Gammaproteobacteria|Pseudomonadales|Moraxellaceae|Acinetobacter|Acinetobacter oleivorans|Acinetobacter oleivorans DR1	Bacteria	Proteobacteria	Gammaproteobacteria	Pseudomonadales	Moraxellaceae	gi|298698338|gb|CP002080.1|	Acinetobacter oleivorans DR1, complete genome	436717	3258840	3259418	579	100	0	96.55
Pcub_MSU1_v1_01225_0_0_1	1	1017	Acidovorax sp. KKS102	Bacteria|Proteobacteria|Betaproteobacteria|Burkholderiales|Comamonadaceae|Acidovorax|Acidovorax sp. KKS102	Bacteria	Proteobacteria	Betaproteobacteria	Burkholderiales	Comamonadaceae	gi|407894523|gb|CP003872.1|	Acidovorax sp. KKS102, complete genome	358220	2106952	2107968	1017	100	0	94.69
Pcub_MSU1_v1_01241_0_0_1	1	768	Delftia sp. Cs1-4	Bacteria|Proteobacteria|Betaproteobacteria|Burkholderiales|Comamonadaceae|Delftia|Delftia sp. Cs1-4	Bacteria	Proteobacteria	Betaproteobacteria	Burkholderiales	Comamonadaceae	gi|333741867|gb|CP002735.1|	Delftia sp. Cs1-4, complete genome	742013	6493743	6494510	768	100	0	99.35
Pcub_MSU1_v1_01255_0_3_1	1	609	Acidovorax avenae subsp. avenae ATCC 19860	Bacteria|Proteobacteria|Betaproteobacteria|Burkholderiales|Comamonadaceae|Acidovorax|Acidovorax avenae|Acidovorax avenae subsp. avenae|Acidovorax avenae subsp. avenae ATCC 19860	Bacteria	Proteobacteria	Betaproteobacteria	Burkholderiales	Comamonadaceae	gi|323371659|gb|CP002521.1|	Acidovorax avenae subsp. avenae ATCC 19860, complete genome	643561	1665554	1664946	609	100	0	90.31
Pcub_MSU1_v1_01263_0_3_1	1	753	Stenotrophomonas maltophilia	Bacteria|Proteobacteria|Gammaproteobacteria|Xanthomonadales|Xanthomonadaceae|Stenotrophomonas|Stenotrophomonas maltophilia group|Stenotrophomonas maltophilia	Bacteria	Proteobacteria	Gammaproteobacteria	Xanthomonadales	Xanthomonadaceae	gi|922795094|gb|CP011305.1|	Stenotrophomonas maltophilia strain ISMMS2, complete genome	40324	2356334	2357086	753	100	0	90.44
Pcub_MSU1_v1_01263_0_6_1	1	1176	Stenotrophomonas maltophilia K279a	Bacteria|Proteobacteria|Gammaproteobacteria|Xanthomonadales|Xanthomonadaceae|Stenotrophomonas|Stenotrophomonas maltophilia group|Stenotrophomonas maltophilia|Stenotrophomonas maltophilia K279a	Bacteria	Proteobacteria	Gammaproteobacteria	Xanthomonadales	Xanthomonadaceae	gi|190010013|emb|AM743169.1|	Stenotrophomonas maltophilia K279a complete genome, strain K279a	522373	2629571	2630746	1176	100	0	91.58
Pcub_MSU1_v1_01263_0_8_1	1	2082	Stenotrophomonas maltophilia	Bacteria|Proteobacteria|Gammaproteobacteria|Xanthomonadales|Xanthomonadaceae|Stenotrophomonas|Stenotrophomonas maltophilia group|Stenotrophomonas maltophilia	Bacteria	Proteobacteria	Gammaproteobacteria	Xanthomonadales	Xanthomonadaceae	gi|794340597|gb|KC430928.2|	Stenotrophomonas maltophilia strain KJ-2 oligoalginate lyase (oal) gene, complete cds	40324	148	2229	2082	100	0	99.14
Pcub_MSU1_v1_01278_0_1_1	1	588	Delftia sp. Cs1-4	Bacteria|Proteobacteria|Betaproteobacteria|Burkholderiales|Comamonadaceae|Delftia|Delftia sp. Cs1-4	Bacteria	Proteobacteria	Betaproteobacteria	Burkholderiales	Comamonadaceae	gi|333741867|gb|CP002735.1|	Delftia sp. Cs1-4, complete genome	742013	3014477	3013890	588	100	0	92.86
Pcub_MSU1_v1_01288_0_0_1	1	651	Acinetobacter baumannii	Bacteria|Proteobacteria|Gammaproteobacteria|Pseudomonadales|Moraxellaceae|Acinetobacter|Acinetobacter calcoaceticus/baumannii complex|Acinetobacter baumannii	Bacteria	Proteobacteria	Gammaproteobacteria	Pseudomonadales	Moraxellaceae	gi|902756494|emb|LN868200.1|	Acinetobacter baumannii genome assembly R2090, chromosome : I	470	159523	160173	651	100	0	94.78
Pcub_MSU1_v1_01305_0_2_1	1	2166	Acinetobacter oleivorans DR1	Bacteria|Proteobacteria|Gammaproteobacteria|Pseudomonadales|Moraxellaceae|Acinetobacter|Acinetobacter oleivorans|Acinetobacter oleivorans DR1	Bacteria	Proteobacteria	Gammaproteobacteria	Pseudomonadales	Moraxellaceae	gi|298698338|gb|CP002080.1|	Acinetobacter oleivorans DR1, complete genome	436717	1060942	1063107	2166	100	0	95.38
Pcub_MSU1_v1_01318_0_2_1	1	1026	Stenotrophomonas maltophilia D457	Bacteria|Proteobacteria|Gammaproteobacteria|Xanthomonadales|Xanthomonadaceae|Stenotrophomonas|Stenotrophomonas maltophilia group|Stenotrophomonas maltophilia|Stenotrophomonas maltophilia D457	Bacteria	Proteobacteria	Gammaproteobacteria	Xanthomonadales	Xanthomonadaceae	gi|384076029|emb|HE798556.1|	Stenotrophomonas maltophilia D457 complete genome	1163399	3241536	3240511	1026	100	0	99.22
Pcub_MSU1_v1_01318_0_5_1	1	2403	Acidovorax avenae subsp. avenae ATCC 19860	Bacteria|Proteobacteria|Betaproteobacteria|Burkholderiales|Comamonadaceae|Acidovorax|Acidovorax avenae|Acidovorax avenae subsp. avenae|Acidovorax avenae subsp. avenae ATCC 19860	Bacteria	Proteobacteria	Betaproteobacteria	Burkholderiales	Comamonadaceae	gi|323371659|gb|CP002521.1|	Acidovorax avenae subsp. avenae ATCC 19860, complete genome	643561	4575765	4573363	2403	100	0	92.59
Pcub_MSU1_v1_01319_0_1_1	1	1185	Pseudomonas putida S12	Bacteria|Proteobacteria|Gammaproteobacteria|Pseudomonadales|Pseudomonadaceae|Pseudomonas|Pseudomonas putida group|Pseudomonas putida|Pseudomonas putida S12	Bacteria	Proteobacteria	Gammaproteobacteria	Pseudomonadales	Pseudomonadaceae	gi|734574563|gb|CP009974.1|	Pseudomonas putida S12, complete genome	1215087	2162468	2163652	1185	100	0	99.83
Pcub_MSU1_v1_01319_0_2_1	1	1266	Pseudomonas putida BIRD-1	Bacteria|Proteobacteria|Gammaproteobacteria|Pseudomonadales|Pseudomonadaceae|Pseudomonas|Pseudomonas putida group|Pseudomonas putida|Pseudomonas putida BIRD-1	Bacteria	Proteobacteria	Gammaproteobacteria	Pseudomonadales	Pseudomonadaceae	gi|313496345|gb|CP002290.1|	Pseudomonas putida BIRD-1, complete genome	931281	35574	36839	1266	100	0	99.76
Pcub_MSU1_v1_01319_0_3_1	1	1209	Pseudomonas putida S12	Bacteria|Proteobacteria|Gammaproteobacteria|Pseudomonadales|Pseudomonadaceae|Pseudomonas|Pseudomonas putida group|Pseudomonas putida|Pseudomonas putida S12	Bacteria	Proteobacteria	Gammaproteobacteria	Pseudomonadales	Pseudomonadaceae	gi|734574563|gb|CP009974.1|	Pseudomonas putida S12, complete genome	1215087	2166597	2167805	1209	100	0	99.92
Pcub_MSU1_v1_01320_0_1_1	1	621	Delftia acidovorans SPH-1	Bacteria|Proteobacteria|Betaproteobacteria|Burkholderiales|Comamonadaceae|Delftia|Delftia acidovorans|Delftia acidovorans SPH-1	Bacteria	Proteobacteria	Betaproteobacteria	Burkholderiales	Comamonadaceae	gi|160361034|gb|CP000884.1|	Delftia acidovorans SPH-1, complete genome	398578	5342666	5343286	621	100	0	94.69
Pcub_MSU1_v1_01322_0_0_1	1	1473	Delftia acidovorans SPH-1	Bacteria|Proteobacteria|Betaproteobacteria|Burkholderiales|Comamonadaceae|Delftia|Delftia acidovorans|Delftia acidovorans SPH-1	Bacteria	Proteobacteria	Betaproteobacteria	Burkholderiales	Comamonadaceae	gi|160361034|gb|CP000884.1|	Delftia acidovorans SPH-1, complete genome	398578	745017	746488	1478	100	0	94.65
Pcub_MSU1_v1_01323_0_0_1	1	1191	Delftia acidovorans SPH-1	Bacteria|Proteobacteria|Betaproteobacteria|Burkholderiales|Comamonadaceae|Delftia|Delftia acidovorans|Delftia acidovorans SPH-1	Bacteria	Proteobacteria	Betaproteobacteria	Burkholderiales	Comamonadaceae	gi|160361034|gb|CP000884.1|	Delftia acidovorans SPH-1, complete genome	398578	5530992	5529802	1191	100	0	99.33
Pcub_MSU1_v1_01332_0_0_1	1	774	Pantholops hodgsonii	Eukaryota|Opisthokonta|Metazoa|Eumetazoa|Bilateria|Deuterostomia|Chordata|Craniata|Vertebrata|Gnathostomata|Teleostomi|Euteleostomi|Sarcopterygii|Dipnotetrapodomorpha|Tetrapoda|Amniota|Mammalia|Theria|Eutheria|Boreoeutheria|Laurasiatheria|Cetartiodactyla|Ruminantia|Pecora|Bovidae|Antilopinae|Pantholops|Pantholops hodgsonii	Eukaryota	Opisthokonta	Metazoa	Eumetazoa	Bilateria	gi|556758117|ref|XM_005974332.1|	PREDICTED: Pantholops hodgsonii L-xylulose reductase-like (LOC102330635), mRNA	59538	394	1167	774	100	0	99.74
Pcub_MSU1_v1_01333_0_1_1	1	996	Delftia sp. Cs1-4	Bacteria|Proteobacteria|Betaproteobacteria|Burkholderiales|Comamonadaceae|Delftia|Delftia sp. Cs1-4	Bacteria	Proteobacteria	Betaproteobacteria	Burkholderiales	Comamonadaceae	gi|333741867|gb|CP002735.1|	Delftia sp. Cs1-4, complete genome	742013	384694	383699	996	100	0	96.89
Pcub_MSU1_v1_01339_0_0_1	1	252	Acinetobacter calcoaceticus PHEA-2	Bacteria|Proteobacteria|Gammaproteobacteria|Pseudomonadales|Moraxellaceae|Acinetobacter|Acinetobacter calcoaceticus/baumannii complex|Acinetobacter calcoaceticus|Acinetobacter calcoaceticus PHEA-2	Bacteria	Proteobacteria	Gammaproteobacteria	Pseudomonadales	Moraxellaceae	gi|325121063|gb|CP002177.1|	Acinetobacter calcoaceticus PHEA-2, complete genome	871585	2822657	2822406	252	100	2e-124	99.21
Pcub_MSU1_v1_01339_0_1_1	1	906	Acinetobacter oleivorans DR1	Bacteria|Proteobacteria|Gammaproteobacteria|Pseudomonadales|Moraxellaceae|Acinetobacter|Acinetobacter oleivorans|Acinetobacter oleivorans DR1	Bacteria	Proteobacteria	Gammaproteobacteria	Pseudomonadales	Moraxellaceae	gi|298698338|gb|CP002080.1|	Acinetobacter oleivorans DR1, complete genome	436717	367176	368081	906	100	0	93.6
Pcub_MSU1_v1_01355_0_1_1	1	555	Acinetobacter oleivorans DR1	Bacteria|Proteobacteria|Gammaproteobacteria|Pseudomonadales|Moraxellaceae|Acinetobacter|Acinetobacter oleivorans|Acinetobacter oleivorans DR1	Bacteria	Proteobacteria	Gammaproteobacteria	Pseudomonadales	Moraxellaceae	gi|298698338|gb|CP002080.1|	Acinetobacter oleivorans DR1, complete genome	436717	4127272	4127826	555	100	0	92.43
Pcub_MSU1_v1_01355_0_2_1	1	1941	Acinetobacter oleivorans DR1	Bacteria|Proteobacteria|Gammaproteobacteria|Pseudomonadales|Moraxellaceae|Acinetobacter|Acinetobacter oleivorans|Acinetobacter oleivorans DR1	Bacteria	Proteobacteria	Gammaproteobacteria	Pseudomonadales	Moraxellaceae	gi|298698338|gb|CP002080.1|	Acinetobacter oleivorans DR1, complete genome	436717	4127945	4129885	1941	100	0	97.06
Pcub_MSU1_v1_01355_0_3_1	1	459	Acinetobacter oleivorans DR1	Bacteria|Proteobacteria|Gammaproteobacteria|Pseudomonadales|Moraxellaceae|Acinetobacter|Acinetobacter oleivorans|Acinetobacter oleivorans DR1	Bacteria	Proteobacteria	Gammaproteobacteria	Pseudomonadales	Moraxellaceae	gi|298698338|gb|CP002080.1|	Acinetobacter oleivorans DR1, complete genome	436717	4122579	4122121	459	100	0	92.59
Pcub_MSU1_v1_01355_0_4_1	1	861	Acinetobacter sp. ES-1	Bacteria|Proteobacteria|Gammaproteobacteria|Pseudomonadales|Moraxellaceae|Acinetobacter|Acinetobacter sp. ES-1	Bacteria	Proteobacteria	Gammaproteobacteria	Pseudomonadales	Moraxellaceae	gi|154982281|gb|EU045575.1|	Acinetobacter sp. ES-1 esterase (estK) gene, complete cds	459651	209	1069	861	100	0	96.17
Pcub_MSU1_v1_01357_0_0_1	1	1290	Acinetobacter oleivorans DR1	Bacteria|Proteobacteria|Gammaproteobacteria|Pseudomonadales|Moraxellaceae|Acinetobacter|Acinetobacter oleivorans|Acinetobacter oleivorans DR1	Bacteria	Proteobacteria	Gammaproteobacteria	Pseudomonadales	Moraxellaceae	gi|298698338|gb|CP002080.1|	Acinetobacter oleivorans DR1, complete genome	436717	3471242	3469953	1290	100	0	98.29
Pcub_MSU1_v1_01376_0_1_1	1	1422	Acinetobacter oleivorans DR1	Bacteria|Proteobacteria|Gammaproteobacteria|Pseudomonadales|Moraxellaceae|Acinetobacter|Acinetobacter oleivorans|Acinetobacter oleivorans DR1	Bacteria	Proteobacteria	Gammaproteobacteria	Pseudomonadales	Moraxellaceae	gi|298698338|gb|CP002080.1|	Acinetobacter oleivorans DR1, complete genome	436717	340673	342094	1422	100	0	93.53
Pcub_MSU1_v1_01376_0_2_1	1	4482	Acinetobacter oleivorans DR1	Bacteria|Proteobacteria|Gammaproteobacteria|Pseudomonadales|Moraxellaceae|Acinetobacter|Acinetobacter oleivorans|Acinetobacter oleivorans DR1	Bacteria	Proteobacteria	Gammaproteobacteria	Pseudomonadales	Moraxellaceae	gi|298698338|gb|CP002080.1|	Acinetobacter oleivorans DR1, complete genome	436717	336122	340603	4482	100	0	93.57
Pcub_MSU1_v1_01381_0_0_1	1	1299	Stenotrophomonas maltophilia D457	Bacteria|Proteobacteria|Gammaproteobacteria|Xanthomonadales|Xanthomonadaceae|Stenotrophomonas|Stenotrophomonas maltophilia group|Stenotrophomonas maltophilia|Stenotrophomonas maltophilia D457	Bacteria	Proteobacteria	Gammaproteobacteria	Xanthomonadales	Xanthomonadaceae	gi|384076029|emb|HE798556.1|	Stenotrophomonas maltophilia D457 complete genome	1163399	3363898	3365196	1299	100	0	98.61
Pcub_MSU1_v1_01383_0_1_1	1	1989	Delftia acidovorans SPH-1	Bacteria|Proteobacteria|Betaproteobacteria|Burkholderiales|Comamonadaceae|Delftia|Delftia acidovorans|Delftia acidovorans SPH-1	Bacteria	Proteobacteria	Betaproteobacteria	Burkholderiales	Comamonadaceae	gi|160361034|gb|CP000884.1|	Delftia acidovorans SPH-1, complete genome	398578	2497018	2499006	1989	100	0	98.04
Pcub_MSU1_v1_01401_0_1_1	1	2490	Stenotrophomonas maltophilia D457	Bacteria|Proteobacteria|Gammaproteobacteria|Xanthomonadales|Xanthomonadaceae|Stenotrophomonas|Stenotrophomonas maltophilia group|Stenotrophomonas maltophilia|Stenotrophomonas maltophilia D457	Bacteria	Proteobacteria	Gammaproteobacteria	Xanthomonadales	Xanthomonadaceae	gi|384076029|emb|HE798556.1|	Stenotrophomonas maltophilia D457 complete genome	1163399	98571	96082	2490	100	0	97.31
Pcub_MSU1_v1_01402_0_0_1	1	759	Delftia sp. Cs1-4	Bacteria|Proteobacteria|Betaproteobacteria|Burkholderiales|Comamonadaceae|Delftia|Delftia sp. Cs1-4	Bacteria	Proteobacteria	Betaproteobacteria	Burkholderiales	Comamonadaceae	gi|333741867|gb|CP002735.1|	Delftia sp. Cs1-4, complete genome	742013	5961581	5962339	759	100	0	97.63
Pcub_MSU1_v1_01403_0_0_1	1	1266	Delftia acidovorans SPH-1	Bacteria|Proteobacteria|Betaproteobacteria|Burkholderiales|Comamonadaceae|Delftia|Delftia acidovorans|Delftia acidovorans SPH-1	Bacteria	Proteobacteria	Betaproteobacteria	Burkholderiales	Comamonadaceae	gi|160361034|gb|CP000884.1|	Delftia acidovorans SPH-1, complete genome	398578	327524	328789	1266	100	0	97.87
Pcub_MSU1_v1_01407_0_9_1	1	366	Acidovorax sp. KKS102	Bacteria|Proteobacteria|Betaproteobacteria|Burkholderiales|Comamonadaceae|Acidovorax|Acidovorax sp. KKS102	Bacteria	Proteobacteria	Betaproteobacteria	Burkholderiales	Comamonadaceae	gi|407894523|gb|CP003872.1|	Acidovorax sp. KKS102, complete genome	358220	3013341	3013706	366	100	3e-164	95.63
Pcub_MSU1_v1_01408_0_0_1	1	930	Acinetobacter oleivorans DR1	Bacteria|Proteobacteria|Gammaproteobacteria|Pseudomonadales|Moraxellaceae|Acinetobacter|Acinetobacter oleivorans|Acinetobacter oleivorans DR1	Bacteria	Proteobacteria	Gammaproteobacteria	Pseudomonadales	Moraxellaceae	gi|298698338|gb|CP002080.1|	Acinetobacter oleivorans DR1, complete genome	436717	3551440	3550511	930	100	0	91.18
Pcub_MSU1_v1_01417_0_0_1	1	804	Acinetobacter oleivorans DR1	Bacteria|Proteobacteria|Gammaproteobacteria|Pseudomonadales|Moraxellaceae|Acinetobacter|Acinetobacter oleivorans|Acinetobacter oleivorans DR1	Bacteria	Proteobacteria	Gammaproteobacteria	Pseudomonadales	Moraxellaceae	gi|298698338|gb|CP002080.1|	Acinetobacter oleivorans DR1, complete genome	436717	613906	614709	804	100	0	97.76
Pcub_MSU1_v1_01419_0_0_1	1	1845	Delftia acidovorans SPH-1	Bacteria|Proteobacteria|Betaproteobacteria|Burkholderiales|Comamonadaceae|Delftia|Delftia acidovorans|Delftia acidovorans SPH-1	Bacteria	Proteobacteria	Betaproteobacteria	Burkholderiales	Comamonadaceae	gi|160361034|gb|CP000884.1|	Delftia acidovorans SPH-1, complete genome	398578	3637036	3638880	1845	100	0	97.34
Pcub_MSU1_v1_01420_0_0_1	1	774	Acinetobacter oleivorans DR1	Bacteria|Proteobacteria|Gammaproteobacteria|Pseudomonadales|Moraxellaceae|Acinetobacter|Acinetobacter oleivorans|Acinetobacter oleivorans DR1	Bacteria	Proteobacteria	Gammaproteobacteria	Pseudomonadales	Moraxellaceae	gi|298698338|gb|CP002080.1|	Acinetobacter oleivorans DR1, complete genome	436717	1252764	1253537	774	100	0	94.7
Pcub_MSU1_v1_01420_0_1_1	1	957	Acinetobacter baumannii	Bacteria|Proteobacteria|Gammaproteobacteria|Pseudomonadales|Moraxellaceae|Acinetobacter|Acinetobacter calcoaceticus/baumannii complex|Acinetobacter baumannii	Bacteria	Proteobacteria	Gammaproteobacteria	Pseudomonadales	Moraxellaceae	gi|902756494|emb|LN868200.1|	Acinetobacter baumannii genome assembly R2090, chromosome : I	470	1313047	1312092	957	100	0	90.49
Pcub_MSU1_v1_01424_0_0_1	1	2838	Acinetobacter oleivorans DR1	Bacteria|Proteobacteria|Gammaproteobacteria|Pseudomonadales|Moraxellaceae|Acinetobacter|Acinetobacter oleivorans|Acinetobacter oleivorans DR1	Bacteria	Proteobacteria	Gammaproteobacteria	Pseudomonadales	Moraxellaceae	gi|298698338|gb|CP002080.1|	Acinetobacter oleivorans DR1, complete genome	436717	4111281	4114118	2840	100	0	93.03
Pcub_MSU1_v1_01431_0_0_1	1	837	Acinetobacter oleivorans DR1	Bacteria|Proteobacteria|Gammaproteobacteria|Pseudomonadales|Moraxellaceae|Acinetobacter|Acinetobacter oleivorans|Acinetobacter oleivorans DR1	Bacteria	Proteobacteria	Gammaproteobacteria	Pseudomonadales	Moraxellaceae	gi|298698338|gb|CP002080.1|	Acinetobacter oleivorans DR1, complete genome	436717	3497413	3496577	837	100	0	95.7
Pcub_MSU1_v1_01431_0_1_1	1	894	Acinetobacter calcoaceticus	Bacteria|Proteobacteria|Gammaproteobacteria|Pseudomonadales|Moraxellaceae|Acinetobacter|Acinetobacter calcoaceticus/baumannii complex|Acinetobacter calcoaceticus	Bacteria	Proteobacteria	Gammaproteobacteria	Pseudomonadales	Moraxellaceae	gi|12001915|gb|AF038541.1|AF038541	Acinetobacter calcoaceticus DNA polymerase I (polA) gene, complete cds	471	1988	2881	894	100	0	95.3
Pcub_MSU1_v1_01444_0_0_1	1	705	Delftia sp. Cs1-4	Bacteria|Proteobacteria|Betaproteobacteria|Burkholderiales|Comamonadaceae|Delftia|Delftia sp. Cs1-4	Bacteria	Proteobacteria	Betaproteobacteria	Burkholderiales	Comamonadaceae	gi|333741867|gb|CP002735.1|	Delftia sp. Cs1-4, complete genome	742013	5593412	5594116	705	100	0	97.3
Pcub_MSU1_v1_01444_0_2_1	1	1224	Delftia sp. Cs1-4	Bacteria|Proteobacteria|Betaproteobacteria|Burkholderiales|Comamonadaceae|Delftia|Delftia sp. Cs1-4	Bacteria	Proteobacteria	Betaproteobacteria	Burkholderiales	Comamonadaceae	gi|333741867|gb|CP002735.1|	Delftia sp. Cs1-4, complete genome	742013	5590908	5589671	1238	100	0	96.85
Pcub_MSU1_v1_01444_0_4_1	1	924	Delftia acidovorans SPH-1	Bacteria|Proteobacteria|Betaproteobacteria|Burkholderiales|Comamonadaceae|Delftia|Delftia acidovorans|Delftia acidovorans SPH-1	Bacteria	Proteobacteria	Betaproteobacteria	Burkholderiales	Comamonadaceae	gi|160361034|gb|CP000884.1|	Delftia acidovorans SPH-1, complete genome	398578	1751778	1752701	924	100	0	98.05
Pcub_MSU1_v1_01447_0_2_1	1	1125	Acidovorax citrulli AAC00-1	Bacteria|Proteobacteria|Betaproteobacteria|Burkholderiales|Comamonadaceae|Acidovorax|Acidovorax citrulli|Acidovorax citrulli AAC00-1	Bacteria	Proteobacteria	Betaproteobacteria	Burkholderiales	Comamonadaceae	gi|120587178|gb|CP000512.1|	Acidovorax citrulli AAC00-1, complete genome	397945	3588748	3587624	1127	100	0	90.15
Pcub_MSU1_v1_01455_0_0_1	1	1980	Delftia acidovorans SPH-1	Bacteria|Proteobacteria|Betaproteobacteria|Burkholderiales|Comamonadaceae|Delftia|Delftia acidovorans|Delftia acidovorans SPH-1	Bacteria	Proteobacteria	Betaproteobacteria	Burkholderiales	Comamonadaceae	gi|160361034|gb|CP000884.1|	Delftia acidovorans SPH-1, complete genome	398578	51062	53041	1980	100	0	98.08
Pcub_MSU1_v1_01455_0_3_1	1	771	Pantholops hodgsonii	Eukaryota|Opisthokonta|Metazoa|Eumetazoa|Bilateria|Deuterostomia|Chordata|Craniata|Vertebrata|Gnathostomata|Teleostomi|Euteleostomi|Sarcopterygii|Dipnotetrapodomorpha|Tetrapoda|Amniota|Mammalia|Theria|Eutheria|Boreoeutheria|Laurasiatheria|Cetartiodactyla|Ruminantia|Pecora|Bovidae|Antilopinae|Pantholops|Pantholops hodgsonii	Eukaryota	Opisthokonta	Metazoa	Eumetazoa	Bilateria	gi|556781051|ref|XM_005985486.1|	PREDICTED: Pantholops hodgsonii putative septum site-determining protein MinD-like (LOC102332971), mRNA	59538	1	771	771	100	0	99.35
Pcub_MSU1_v1_01460_0_0_1	1	1113	Acinetobacter oleivorans DR1	Bacteria|Proteobacteria|Gammaproteobacteria|Pseudomonadales|Moraxellaceae|Acinetobacter|Acinetobacter oleivorans|Acinetobacter oleivorans DR1	Bacteria	Proteobacteria	Gammaproteobacteria	Pseudomonadales	Moraxellaceae	gi|298698338|gb|CP002080.1|	Acinetobacter oleivorans DR1, complete genome	436717	1751737	1752849	1113	100	0	93.8
Pcub_MSU1_v1_01465_0_7_1	1	1197	Delftia acidovorans SPH-1	Bacteria|Proteobacteria|Betaproteobacteria|Burkholderiales|Comamonadaceae|Delftia|Delftia acidovorans|Delftia acidovorans SPH-1	Bacteria	Proteobacteria	Betaproteobacteria	Burkholderiales	Comamonadaceae	gi|160361034|gb|CP000884.1|	Delftia acidovorans SPH-1, complete genome	398578	2422212	2421016	1197	100	0	98.41
Pcub_MSU1_v1_01470_0_4_1	1	753	Delftia sp. Cs1-4	Bacteria|Proteobacteria|Betaproteobacteria|Burkholderiales|Comamonadaceae|Delftia|Delftia sp. Cs1-4	Bacteria	Proteobacteria	Betaproteobacteria	Burkholderiales	Comamonadaceae	gi|333741867|gb|CP002735.1|	Delftia sp. Cs1-4, complete genome	742013	5437295	5438047	753	100	0	95.22
Pcub_MSU1_v1_01470_0_5_1	1	1011	Delftia acidovorans SPH-1	Bacteria|Proteobacteria|Betaproteobacteria|Burkholderiales|Comamonadaceae|Delftia|Delftia acidovorans|Delftia acidovorans SPH-1	Bacteria	Proteobacteria	Betaproteobacteria	Burkholderiales	Comamonadaceae	gi|160361034|gb|CP000884.1|	Delftia acidovorans SPH-1, complete genome	398578	2012832	2013842	1012	100	0	95.95
Pcub_MSU1_v1_01471_0_0_1	1	840	Stenotrophomonas maltophilia D457	Bacteria|Proteobacteria|Gammaproteobacteria|Xanthomonadales|Xanthomonadaceae|Stenotrophomonas|Stenotrophomonas maltophilia group|Stenotrophomonas maltophilia|Stenotrophomonas maltophilia D457	Bacteria	Proteobacteria	Gammaproteobacteria	Xanthomonadales	Xanthomonadaceae	gi|384076029|emb|HE798556.1|	Stenotrophomonas maltophilia D457 complete genome	1163399	2086286	2085447	840	100	0	99.52
Pcub_MSU1_v1_01474_0_0_1	1	528	Delftia acidovorans SPH-1	Bacteria|Proteobacteria|Betaproteobacteria|Burkholderiales|Comamonadaceae|Delftia|Delftia acidovorans|Delftia acidovorans SPH-1	Bacteria	Proteobacteria	Betaproteobacteria	Burkholderiales	Comamonadaceae	gi|160361034|gb|CP000884.1|	Delftia acidovorans SPH-1, complete genome	398578	6629355	6629882	528	100	0	98.48
Pcub_MSU1_v1_01474_0_4_1	1	1527	Delftia acidovorans SPH-1	Bacteria|Proteobacteria|Betaproteobacteria|Burkholderiales|Comamonadaceae|Delftia|Delftia acidovorans|Delftia acidovorans SPH-1	Bacteria	Proteobacteria	Betaproteobacteria	Burkholderiales	Comamonadaceae	gi|160361034|gb|CP000884.1|	Delftia acidovorans SPH-1, complete genome	398578	6633070	6634596	1527	100	0	98.56
Pcub_MSU1_v1_01477_0_2_1	1	810	Delftia acidovorans SPH-1	Bacteria|Proteobacteria|Betaproteobacteria|Burkholderiales|Comamonadaceae|Delftia|Delftia acidovorans|Delftia acidovorans SPH-1	Bacteria	Proteobacteria	Betaproteobacteria	Burkholderiales	Comamonadaceae	gi|160361034|gb|CP000884.1|	Delftia acidovorans SPH-1, complete genome	398578	152186	152995	810	100	0	98.52
Pcub_MSU1_v1_01479_0_1_1	1	3453	Acinetobacter oleivorans DR1	Bacteria|Proteobacteria|Gammaproteobacteria|Pseudomonadales|Moraxellaceae|Acinetobacter|Acinetobacter oleivorans|Acinetobacter oleivorans DR1	Bacteria	Proteobacteria	Gammaproteobacteria	Pseudomonadales	Moraxellaceae	gi|298698338|gb|CP002080.1|	Acinetobacter oleivorans DR1, complete genome	436717	675804	679253	3453	100	0	93.45
Pcub_MSU1_v1_01479_0_2_1	1	1881	Acinetobacter oleivorans DR1	Bacteria|Proteobacteria|Gammaproteobacteria|Pseudomonadales|Moraxellaceae|Acinetobacter|Acinetobacter oleivorans|Acinetobacter oleivorans DR1	Bacteria	Proteobacteria	Gammaproteobacteria	Pseudomonadales	Moraxellaceae	gi|298698338|gb|CP002080.1|	Acinetobacter oleivorans DR1, complete genome	436717	673742	675622	1881	100	0	95.8
Pcub_MSU1_v1_01482_0_0_1	1	1101	Delftia acidovorans SPH-1	Bacteria|Proteobacteria|Betaproteobacteria|Burkholderiales|Comamonadaceae|Delftia|Delftia acidovorans|Delftia acidovorans SPH-1	Bacteria	Proteobacteria	Betaproteobacteria	Burkholderiales	Comamonadaceae	gi|160361034|gb|CP000884.1|	Delftia acidovorans SPH-1, complete genome	398578	518099	516999	1101	100	0	100
Pcub_MSU1_v1_01482_0_2_1	1	1086	Delftia acidovorans SPH-1	Bacteria|Proteobacteria|Betaproteobacteria|Burkholderiales|Comamonadaceae|Delftia|Delftia acidovorans|Delftia acidovorans SPH-1	Bacteria	Proteobacteria	Betaproteobacteria	Burkholderiales	Comamonadaceae	gi|160361034|gb|CP000884.1|	Delftia acidovorans SPH-1, complete genome	398578	520917	522002	1086	100	0	100
Pcub_MSU1_v1_01489_0_0_1	1	1083	Pantholops hodgsonii	Eukaryota|Opisthokonta|Metazoa|Eumetazoa|Bilateria|Deuterostomia|Chordata|Craniata|Vertebrata|Gnathostomata|Teleostomi|Euteleostomi|Sarcopterygii|Dipnotetrapodomorpha|Tetrapoda|Amniota|Mammalia|Theria|Eutheria|Boreoeutheria|Laurasiatheria|Cetartiodactyla|Ruminantia|Pecora|Bovidae|Antilopinae|Pantholops|Pantholops hodgsonii	Eukaryota	Opisthokonta	Metazoa	Eumetazoa	Bilateria	gi|556768411|ref|XM_005979361.1|	PREDICTED: Pantholops hodgsonii uncharacterized LOC102329831 (LOC102329831), mRNA	59538	1	1083	1083	100	0	98.34
Pcub_MSU1_v1_01489_0_5_1	1	2448	Pantholops hodgsonii	Eukaryota|Opisthokonta|Metazoa|Eumetazoa|Bilateria|Deuterostomia|Chordata|Craniata|Vertebrata|Gnathostomata|Teleostomi|Euteleostomi|Sarcopterygii|Dipnotetrapodomorpha|Tetrapoda|Amniota|Mammalia|Theria|Eutheria|Boreoeutheria|Laurasiatheria|Cetartiodactyla|Ruminantia|Pecora|Bovidae|Antilopinae|Pantholops|Pantholops hodgsonii	Eukaryota	Opisthokonta	Metazoa	Eumetazoa	Bilateria	gi|556768413|ref|XM_005979362.1|	PREDICTED: Pantholops hodgsonii phenylalanine--tRNA ligase beta subunit, chloroplastic-like (LOC102330181), mRNA	59538	211	2658	2448	100	0	99.31
Pcub_MSU1_v1_01489_0_6_1	1	1053	Pantholops hodgsonii	Eukaryota|Opisthokonta|Metazoa|Eumetazoa|Bilateria|Deuterostomia|Chordata|Craniata|Vertebrata|Gnathostomata|Teleostomi|Euteleostomi|Sarcopterygii|Dipnotetrapodomorpha|Tetrapoda|Amniota|Mammalia|Theria|Eutheria|Boreoeutheria|Laurasiatheria|Cetartiodactyla|Ruminantia|Pecora|Bovidae|Antilopinae|Pantholops|Pantholops hodgsonii	Eukaryota	Opisthokonta	Metazoa	Eumetazoa	Bilateria	gi|556768415|ref|XM_005979363.1|	PREDICTED: Pantholops hodgsonii phenylalanine--tRNA ligase alpha subunit-like (LOC102330555), mRNA	59538	1	1053	1053	100	0	99.72
Pcub_MSU1_v1_01502_0_2_1	1	2178	Delftia sp. Cs1-4	Bacteria|Proteobacteria|Betaproteobacteria|Burkholderiales|Comamonadaceae|Delftia|Delftia sp. Cs1-4	Bacteria	Proteobacteria	Betaproteobacteria	Burkholderiales	Comamonadaceae	gi|333741867|gb|CP002735.1|	Delftia sp. Cs1-4, complete genome	742013	6216977	6214800	2180	100	0	94.72
Pcub_MSU1_v1_01504_0_2_1	1	1269	Delftia sp. Cs1-4	Bacteria|Proteobacteria|Betaproteobacteria|Burkholderiales|Comamonadaceae|Delftia|Delftia sp. Cs1-4	Bacteria	Proteobacteria	Betaproteobacteria	Burkholderiales	Comamonadaceae	gi|333741867|gb|CP002735.1|	Delftia sp. Cs1-4, complete genome	742013	5424884	5426152	1269	100	0	97.24
Pcub_MSU1_v1_01509_0_4_1	1	1314	Delftia sp. Cs1-4	Bacteria|Proteobacteria|Betaproteobacteria|Burkholderiales|Comamonadaceae|Delftia|Delftia sp. Cs1-4	Bacteria	Proteobacteria	Betaproteobacteria	Burkholderiales	Comamonadaceae	gi|333741867|gb|CP002735.1|	Delftia sp. Cs1-4, complete genome	742013	269579	268266	1314	100	0	98.86
Pcub_MSU1_v1_01509_0_6_1	1	1005	Delftia sp. Cs1-4	Bacteria|Proteobacteria|Betaproteobacteria|Burkholderiales|Comamonadaceae|Delftia|Delftia sp. Cs1-4	Bacteria	Proteobacteria	Betaproteobacteria	Burkholderiales	Comamonadaceae	gi|333741867|gb|CP002735.1|	Delftia sp. Cs1-4, complete genome	742013	272056	271052	1005	100	0	98.31
Pcub_MSU1_v1_01512_0_0_1	1	2415	Acinetobacter baumannii	Bacteria|Proteobacteria|Gammaproteobacteria|Pseudomonadales|Moraxellaceae|Acinetobacter|Acinetobacter calcoaceticus/baumannii complex|Acinetobacter baumannii	Bacteria	Proteobacteria	Gammaproteobacteria	Pseudomonadales	Moraxellaceae	gi|827403829|gb|CP010779.1|	Acinetobacter baumannii strain XH386, complete genome	470	2640573	2638159	2416	100	0	91.14
Pcub_MSU1_v1_01514_0_2_1	1	186	Variovorax paradoxus B4	Bacteria|Proteobacteria|Betaproteobacteria|Burkholderiales|Comamonadaceae|Variovorax|Variovorax paradoxus|Variovorax paradoxus B4	Bacteria	Proteobacteria	Betaproteobacteria	Burkholderiales	Comamonadaceae	gi|537382758|gb|CP003911.1|	Variovorax paradoxus B4 chromosome 1, complete sequence	1246301	1292552	1292364	189	100	9e-62	90.48
Pcub_MSU1_v1_01518_0_1_1	1	2079	Delftia acidovorans SPH-1	Bacteria|Proteobacteria|Betaproteobacteria|Burkholderiales|Comamonadaceae|Delftia|Delftia acidovorans|Delftia acidovorans SPH-1	Bacteria	Proteobacteria	Betaproteobacteria	Burkholderiales	Comamonadaceae	gi|160361034|gb|CP000884.1|	Delftia acidovorans SPH-1, complete genome	398578	24810	26888	2079	100	0	96.63
Pcub_MSU1_v1_01518_0_2_1	1	600	Delftia sp. Cs1-4	Bacteria|Proteobacteria|Betaproteobacteria|Burkholderiales|Comamonadaceae|Delftia|Delftia sp. Cs1-4	Bacteria	Proteobacteria	Betaproteobacteria	Burkholderiales	Comamonadaceae	gi|333741867|gb|CP002735.1|	Delftia sp. Cs1-4, complete genome	742013	30074	30673	600	100	0	99
Pcub_MSU1_v1_01526_0_0_1	1	546	Delftia acidovorans SPH-1	Bacteria|Proteobacteria|Betaproteobacteria|Burkholderiales|Comamonadaceae|Delftia|Delftia acidovorans|Delftia acidovorans SPH-1	Bacteria	Proteobacteria	Betaproteobacteria	Burkholderiales	Comamonadaceae	gi|160361034|gb|CP000884.1|	Delftia acidovorans SPH-1, complete genome	398578	4053168	4052623	546	100	0	96.52
Pcub_MSU1_v1_01529_0_0_1	1	1158	Delftia sp. Cs1-4	Bacteria|Proteobacteria|Betaproteobacteria|Burkholderiales|Comamonadaceae|Delftia|Delftia sp. Cs1-4	Bacteria	Proteobacteria	Betaproteobacteria	Burkholderiales	Comamonadaceae	gi|333741867|gb|CP002735.1|	Delftia sp. Cs1-4, complete genome	742013	515283	514126	1158	100	0	96.63
Pcub_MSU1_v1_01532_0_2_1	1	486	Alicycliphilus denitrificans K601	Bacteria|Proteobacteria|Betaproteobacteria|Burkholderiales|Comamonadaceae|Alicycliphilus|Alicycliphilus denitrificans|Alicycliphilus denitrificans K601	Bacteria	Proteobacteria	Betaproteobacteria	Burkholderiales	Comamonadaceae	gi|329308025|gb|CP002657.1|	Alicycliphilus denitrificans K601, complete genome	596154	3837639	3837154	487	100	0	91.38
Pcub_MSU1_v1_01532_0_3_1	1	783	Acidovorax sp. KKS102	Bacteria|Proteobacteria|Betaproteobacteria|Burkholderiales|Comamonadaceae|Acidovorax|Acidovorax sp. KKS102	Bacteria	Proteobacteria	Betaproteobacteria	Burkholderiales	Comamonadaceae	gi|407894523|gb|CP003872.1|	Acidovorax sp. KKS102, complete genome	358220	1468446	1469228	783	100	0	92.21
Pcub_MSU1_v1_01532_0_4_1	1	1080	Acidovorax citrulli AAC00-1	Bacteria|Proteobacteria|Betaproteobacteria|Burkholderiales|Comamonadaceae|Acidovorax|Acidovorax citrulli|Acidovorax citrulli AAC00-1	Bacteria	Proteobacteria	Betaproteobacteria	Burkholderiales	Comamonadaceae	gi|120587178|gb|CP000512.1|	Acidovorax citrulli AAC00-1, complete genome	397945	2034795	2035871	1081	100	0	90.29
Pcub_MSU1_v1_01533_0_0_1	1	702	Delftia acidovorans SPH-1	Bacteria|Proteobacteria|Betaproteobacteria|Burkholderiales|Comamonadaceae|Delftia|Delftia acidovorans|Delftia acidovorans SPH-1	Bacteria	Proteobacteria	Betaproteobacteria	Burkholderiales	Comamonadaceae	gi|160361034|gb|CP000884.1|	Delftia acidovorans SPH-1, complete genome	398578	4453492	4452791	702	100	0	96.72
Pcub_MSU1_v1_01539_0_0_1	1	1011	Acinetobacter oleivorans DR1	Bacteria|Proteobacteria|Gammaproteobacteria|Pseudomonadales|Moraxellaceae|Acinetobacter|Acinetobacter oleivorans|Acinetobacter oleivorans DR1	Bacteria	Proteobacteria	Gammaproteobacteria	Pseudomonadales	Moraxellaceae	gi|298698338|gb|CP002080.1|	Acinetobacter oleivorans DR1, complete genome	436717	2998133	2999143	1011	100	0	94.16
Pcub_MSU1_v1_01543_0_0_1	1	489	Acinetobacter oleivorans DR1	Bacteria|Proteobacteria|Gammaproteobacteria|Pseudomonadales|Moraxellaceae|Acinetobacter|Acinetobacter oleivorans|Acinetobacter oleivorans DR1	Bacteria	Proteobacteria	Gammaproteobacteria	Pseudomonadales	Moraxellaceae	gi|298698338|gb|CP002080.1|	Acinetobacter oleivorans DR1, complete genome	436717	1747790	1747281	510	100	0	94.31
Pcub_MSU1_v1_01543_0_1_1	1	1158	Acinetobacter oleivorans DR1	Bacteria|Proteobacteria|Gammaproteobacteria|Pseudomonadales|Moraxellaceae|Acinetobacter|Acinetobacter oleivorans|Acinetobacter oleivorans DR1	Bacteria	Proteobacteria	Gammaproteobacteria	Pseudomonadales	Moraxellaceae	gi|298698338|gb|CP002080.1|	Acinetobacter oleivorans DR1, complete genome	436717	1747901	1749058	1158	100	0	94.04
Pcub_MSU1_v1_01545_0_0_1	1	1641	Acinetobacter calcoaceticus PHEA-2	Bacteria|Proteobacteria|Gammaproteobacteria|Pseudomonadales|Moraxellaceae|Acinetobacter|Acinetobacter calcoaceticus/baumannii complex|Acinetobacter calcoaceticus|Acinetobacter calcoaceticus PHEA-2	Bacteria	Proteobacteria	Gammaproteobacteria	Pseudomonadales	Moraxellaceae	gi|325121063|gb|CP002177.1|	Acinetobacter calcoaceticus PHEA-2, complete genome	871585	1389359	1387719	1642	100	0	93.36
Pcub_MSU1_v1_01545_0_1_1	1	912	Acinetobacter baumannii ZW85-1	Bacteria|Proteobacteria|Gammaproteobacteria|Pseudomonadales|Moraxellaceae|Acinetobacter|Acinetobacter calcoaceticus/baumannii complex|Acinetobacter baumannii|Acinetobacter baumannii ZW85-1	Bacteria	Proteobacteria	Gammaproteobacteria	Pseudomonadales	Moraxellaceae	gi|564739229|gb|CP006768.1|	Acinetobacter baumannii ZW85-1, complete genome	1400867	1705011	1705922	912	100	0	92.87
Pcub_MSU1_v1_01554_0_0_1	1	1665	Delftia acidovorans SPH-1	Bacteria|Proteobacteria|Betaproteobacteria|Burkholderiales|Comamonadaceae|Delftia|Delftia acidovorans|Delftia acidovorans SPH-1	Bacteria	Proteobacteria	Betaproteobacteria	Burkholderiales	Comamonadaceae	gi|160361034|gb|CP000884.1|	Delftia acidovorans SPH-1, complete genome	398578	2575465	2573801	1666	100	0	97.36
Pcub_MSU1_v1_01554_0_2_1	1	990	Delftia sp. Cs1-4	Bacteria|Proteobacteria|Betaproteobacteria|Burkholderiales|Comamonadaceae|Delftia|Delftia sp. Cs1-4	Bacteria	Proteobacteria	Betaproteobacteria	Burkholderiales	Comamonadaceae	gi|333741867|gb|CP002735.1|	Delftia sp. Cs1-4, complete genome	742013	4882876	4883865	990	100	0	97.47
Pcub_MSU1_v1_01555_0_2_1	1	570	Delftia sp. Cs1-4	Bacteria|Proteobacteria|Betaproteobacteria|Burkholderiales|Comamonadaceae|Delftia|Delftia sp. Cs1-4	Bacteria	Proteobacteria	Betaproteobacteria	Burkholderiales	Comamonadaceae	gi|333741867|gb|CP002735.1|	Delftia sp. Cs1-4, complete genome	742013	3304400	3303831	570	100	0	97.19
Pcub_MSU1_v1_01558_0_1_1	1	783	Pantholops hodgsonii	Eukaryota|Opisthokonta|Metazoa|Eumetazoa|Bilateria|Deuterostomia|Chordata|Craniata|Vertebrata|Gnathostomata|Teleostomi|Euteleostomi|Sarcopterygii|Dipnotetrapodomorpha|Tetrapoda|Amniota|Mammalia|Theria|Eutheria|Boreoeutheria|Laurasiatheria|Cetartiodactyla|Ruminantia|Pecora|Bovidae|Antilopinae|Pantholops|Pantholops hodgsonii	Eukaryota	Opisthokonta	Metazoa	Eumetazoa	Bilateria	gi|556743353|ref|XM_005967125.1|	PREDICTED: Pantholops hodgsonii ABC transporter ced-7-like (LOC102324409), mRNA	59538	1	783	783	100	0	98.34
Pcub_MSU1_v1_01565_0_1_1	1	1638	Acinetobacter oleivorans DR1	Bacteria|Proteobacteria|Gammaproteobacteria|Pseudomonadales|Moraxellaceae|Acinetobacter|Acinetobacter oleivorans|Acinetobacter oleivorans DR1	Bacteria	Proteobacteria	Gammaproteobacteria	Pseudomonadales	Moraxellaceae	gi|298698338|gb|CP002080.1|	Acinetobacter oleivorans DR1, complete genome	436717	1788699	1790336	1638	100	0	96.64
Pcub_MSU1_v1_01565_0_2_1	1	810	Acinetobacter oleivorans DR1	Bacteria|Proteobacteria|Gammaproteobacteria|Pseudomonadales|Moraxellaceae|Acinetobacter|Acinetobacter oleivorans|Acinetobacter oleivorans DR1	Bacteria	Proteobacteria	Gammaproteobacteria	Pseudomonadales	Moraxellaceae	gi|298698338|gb|CP002080.1|	Acinetobacter oleivorans DR1, complete genome	436717	1790415	1791224	810	100	0	98.52
Pcub_MSU1_v1_01565_0_3_1	1	1179	Acinetobacter oleivorans DR1	Bacteria|Proteobacteria|Gammaproteobacteria|Pseudomonadales|Moraxellaceae|Acinetobacter|Acinetobacter oleivorans|Acinetobacter oleivorans DR1	Bacteria	Proteobacteria	Gammaproteobacteria	Pseudomonadales	Moraxellaceae	gi|298698338|gb|CP002080.1|	Acinetobacter oleivorans DR1, complete genome	436717	1791286	1792464	1179	100	0	97.12
Pcub_MSU1_v1_01567_0_1_1	1	387	Delftia sp. Cs1-4	Bacteria|Proteobacteria|Betaproteobacteria|Burkholderiales|Comamonadaceae|Delftia|Delftia sp. Cs1-4	Bacteria	Proteobacteria	Betaproteobacteria	Burkholderiales	Comamonadaceae	gi|333741867|gb|CP002735.1|	Delftia sp. Cs1-4, complete genome	742013	1775721	1775335	387	100	0	98.97
Pcub_MSU1_v1_01572_0_1_1	1	1047	Delftia sp. Cs1-4	Bacteria|Proteobacteria|Betaproteobacteria|Burkholderiales|Comamonadaceae|Delftia|Delftia sp. Cs1-4	Bacteria	Proteobacteria	Betaproteobacteria	Burkholderiales	Comamonadaceae	gi|333741867|gb|CP002735.1|	Delftia sp. Cs1-4, complete genome	742013	1511878	1512924	1047	100	0	97.8
Pcub_MSU1_v1_01595_0_1_1	1	1677	Stenotrophomonas maltophilia JV3	Bacteria|Proteobacteria|Gammaproteobacteria|Xanthomonadales|Xanthomonadaceae|Stenotrophomonas|Stenotrophomonas maltophilia group|Stenotrophomonas maltophilia|Stenotrophomonas maltophilia JV3	Bacteria	Proteobacteria	Gammaproteobacteria	Xanthomonadales	Xanthomonadaceae	gi|343776783|gb|CP002986.1|	Stenotrophomonas maltophilia JV3, complete genome	868597	1288916	1290592	1677	100	0	94.16
Pcub_MSU1_v1_01595_0_2_1	1	726	Stenotrophomonas maltophilia K279a	Bacteria|Proteobacteria|Gammaproteobacteria|Xanthomonadales|Xanthomonadaceae|Stenotrophomonas|Stenotrophomonas maltophilia group|Stenotrophomonas maltophilia|Stenotrophomonas maltophilia K279a	Bacteria	Proteobacteria	Gammaproteobacteria	Xanthomonadales	Xanthomonadaceae	gi|190010013|emb|AM743169.1|	Stenotrophomonas maltophilia K279a complete genome, strain K279a	522373	1424294	1423569	726	100	0	94.9
Pcub_MSU1_v1_01598_0_0_1	1	1323	Acinetobacter baumannii	Bacteria|Proteobacteria|Gammaproteobacteria|Pseudomonadales|Moraxellaceae|Acinetobacter|Acinetobacter calcoaceticus/baumannii complex|Acinetobacter baumannii	Bacteria	Proteobacteria	Gammaproteobacteria	Pseudomonadales	Moraxellaceae	gi|742999896|gb|CP010397.1|	Acinetobacter baumannii strain 6200, complete genome	470	3165067	3163745	1323	100	0	92.74
Pcub_MSU1_v1_01598_0_1_1	1	1212	Acinetobacter baumannii	Bacteria|Proteobacteria|Gammaproteobacteria|Pseudomonadales|Moraxellaceae|Acinetobacter|Acinetobacter calcoaceticus/baumannii complex|Acinetobacter baumannii	Bacteria	Proteobacteria	Gammaproteobacteria	Pseudomonadales	Moraxellaceae	gi|742926533|gb|CP010368.1|	Acinetobacter baumannii strain 6411, complete genome	470	3130952	3129741	1212	100	0	92.41
Pcub_MSU1_v1_01598_0_2_1	1	1176	Acinetobacter baumannii SDF	Bacteria|Proteobacteria|Gammaproteobacteria|Pseudomonadales|Moraxellaceae|Acinetobacter|Acinetobacter calcoaceticus/baumannii complex|Acinetobacter baumannii|Acinetobacter baumannii SDF	Bacteria	Proteobacteria	Gammaproteobacteria	Pseudomonadales	Moraxellaceae	gi|169150821|emb|CU468230.2|	Acinetobacter baumannii SDF, complete genome	509170	2529438	2528264	1176	100	0	91.84
Pcub_MSU1_v1_01618_0_1_1	1	762	Delftia tsuruhatensis	Bacteria|Proteobacteria|Betaproteobacteria|Burkholderiales|Comamonadaceae|Delftia|Delftia tsuruhatensis	Bacteria	Proteobacteria	Betaproteobacteria	Burkholderiales	Comamonadaceae	gi|149774731|gb|EF469602.1|	Delftia tsuruhatensis conserved hypothetical protein (lf1) gene, partial cds; conserved hypothetical protein (lf2), hypothetical protein (lf3), and hypothetical protein (lf4) genes, complete cds; In3-4 integron integrase (intI3), hypothetical protein (orfA), hypothetical protein (orfB), hypothetical protein (orfC), unknown (orfD), and hypothetical protein (orfE) genes, complete cds; putative inte…	180282	12559	11798	762	100	0	98.56
Pcub_MSU1_v1_01621_0_1_1	1	873	Delftia sp. Cs1-4	Bacteria|Proteobacteria|Betaproteobacteria|Burkholderiales|Comamonadaceae|Delftia|Delftia sp. Cs1-4	Bacteria	Proteobacteria	Betaproteobacteria	Burkholderiales	Comamonadaceae	gi|333741867|gb|CP002735.1|	Delftia sp. Cs1-4, complete genome	742013	5451627	5450755	873	100	0	98.05
Pcub_MSU1_v1_01621_0_2_1	1	1035	Delftia sp. Cs1-4	Bacteria|Proteobacteria|Betaproteobacteria|Burkholderiales|Comamonadaceae|Delftia|Delftia sp. Cs1-4	Bacteria	Proteobacteria	Betaproteobacteria	Burkholderiales	Comamonadaceae	gi|333741867|gb|CP002735.1|	Delftia sp. Cs1-4, complete genome	742013	5448054	5449091	1040	100	0	94.23
Pcub_MSU1_v1_01621_0_7_1	1	990	Delftia acidovorans SPH-1	Bacteria|Proteobacteria|Betaproteobacteria|Burkholderiales|Comamonadaceae|Delftia|Delftia acidovorans|Delftia acidovorans SPH-1	Bacteria	Proteobacteria	Betaproteobacteria	Burkholderiales	Comamonadaceae	gi|160361034|gb|CP000884.1|	Delftia acidovorans SPH-1, complete genome	398578	1996854	1995865	990	100	0	98.18
Pcub_MSU1_v1_01624_0_0_1	1	705	Stenotrophomonas maltophilia D457	Bacteria|Proteobacteria|Gammaproteobacteria|Xanthomonadales|Xanthomonadaceae|Stenotrophomonas|Stenotrophomonas maltophilia group|Stenotrophomonas maltophilia|Stenotrophomonas maltophilia D457	Bacteria	Proteobacteria	Gammaproteobacteria	Xanthomonadales	Xanthomonadaceae	gi|384076029|emb|HE798556.1|	Stenotrophomonas maltophilia D457 complete genome	1163399	2567351	2568055	705	100	0	98.3
Pcub_MSU1_v1_01629_0_15_1	1	876	Stenotrophomonas maltophilia D457	Bacteria|Proteobacteria|Gammaproteobacteria|Xanthomonadales|Xanthomonadaceae|Stenotrophomonas|Stenotrophomonas maltophilia group|Stenotrophomonas maltophilia|Stenotrophomonas maltophilia D457	Bacteria	Proteobacteria	Gammaproteobacteria	Xanthomonadales	Xanthomonadaceae	gi|384076029|emb|HE798556.1|	Stenotrophomonas maltophilia D457 complete genome	1163399	4398889	4398014	876	100	0	96.35
Pcub_MSU1_v1_01629_0_7_1	1	1500	Stenotrophomonas maltophilia D457	Bacteria|Proteobacteria|Gammaproteobacteria|Xanthomonadales|Xanthomonadaceae|Stenotrophomonas|Stenotrophomonas maltophilia group|Stenotrophomonas maltophilia|Stenotrophomonas maltophilia D457	Bacteria	Proteobacteria	Gammaproteobacteria	Xanthomonadales	Xanthomonadaceae	gi|384076029|emb|HE798556.1|	Stenotrophomonas maltophilia D457 complete genome	1163399	4397832	4396333	1500	100	0	98.8
Pcub_MSU1_v1_01658_0_0_1	1	1107	Delftia acidovorans SPH-1	Bacteria|Proteobacteria|Betaproteobacteria|Burkholderiales|Comamonadaceae|Delftia|Delftia acidovorans|Delftia acidovorans SPH-1	Bacteria	Proteobacteria	Betaproteobacteria	Burkholderiales	Comamonadaceae	gi|160361034|gb|CP000884.1|	Delftia acidovorans SPH-1, complete genome	398578	1126342	1127448	1107	100	0	94.76
Pcub_MSU1_v1_01658_0_3_1	1	870	Delftia sp. Cs1-4	Bacteria|Proteobacteria|Betaproteobacteria|Burkholderiales|Comamonadaceae|Delftia|Delftia sp. Cs1-4	Bacteria	Proteobacteria	Betaproteobacteria	Burkholderiales	Comamonadaceae	gi|333741867|gb|CP002735.1|	Delftia sp. Cs1-4, complete genome	742013	6200128	6199259	870	100	0	95.98
Pcub_MSU1_v1_01682_0_2_1	1	1476	Delftia sp. Cs1-4	Bacteria|Proteobacteria|Betaproteobacteria|Burkholderiales|Comamonadaceae|Delftia|Delftia sp. Cs1-4	Bacteria	Proteobacteria	Betaproteobacteria	Burkholderiales	Comamonadaceae	gi|333741867|gb|CP002735.1|	Delftia sp. Cs1-4, complete genome	742013	1722500	1723975	1478	100	0	93.5
Pcub_MSU1_v1_01685_0_1_1	1	2685	Delftia sp. Cs1-4	Bacteria|Proteobacteria|Betaproteobacteria|Burkholderiales|Comamonadaceae|Delftia|Delftia sp. Cs1-4	Bacteria	Proteobacteria	Betaproteobacteria	Burkholderiales	Comamonadaceae	gi|333741867|gb|CP002735.1|	Delftia sp. Cs1-4, complete genome	742013	5093945	5096653	2711	100	0	95.54
Pcub_MSU1_v1_01686_0_5_1	1	1539	Delftia sp. Cs1-4	Bacteria|Proteobacteria|Betaproteobacteria|Burkholderiales|Comamonadaceae|Delftia|Delftia sp. Cs1-4	Bacteria	Proteobacteria	Betaproteobacteria	Burkholderiales	Comamonadaceae	gi|333741867|gb|CP002735.1|	Delftia sp. Cs1-4, complete genome	742013	6242989	6244527	1539	100	0	95.84
Pcub_MSU1_v1_01689_0_0_1	1	414	Delftia acidovorans SPH-1	Bacteria|Proteobacteria|Betaproteobacteria|Burkholderiales|Comamonadaceae|Delftia|Delftia acidovorans|Delftia acidovorans SPH-1	Bacteria	Proteobacteria	Betaproteobacteria	Burkholderiales	Comamonadaceae	gi|160361034|gb|CP000884.1|	Delftia acidovorans SPH-1, complete genome	398578	517001	516588	414	100	0	99.76
Pcub_MSU1_v1_01689_0_3_1	1	2454	Delftia acidovorans SPH-1	Bacteria|Proteobacteria|Betaproteobacteria|Burkholderiales|Comamonadaceae|Delftia|Delftia acidovorans|Delftia acidovorans SPH-1	Bacteria	Proteobacteria	Betaproteobacteria	Burkholderiales	Comamonadaceae	gi|160361034|gb|CP000884.1|	Delftia acidovorans SPH-1, complete genome	398578	510503	512956	2454	100	0	100
Pcub_MSU1_v1_01711_0_1_1	1	615	Acinetobacter oleivorans DR1	Bacteria|Proteobacteria|Gammaproteobacteria|Pseudomonadales|Moraxellaceae|Acinetobacter|Acinetobacter oleivorans|Acinetobacter oleivorans DR1	Bacteria	Proteobacteria	Gammaproteobacteria	Pseudomonadales	Moraxellaceae	gi|298698338|gb|CP002080.1|	Acinetobacter oleivorans DR1, complete genome	436717	3045713	3045099	615	100	0	93.01
Pcub_MSU1_v1_01711_0_4_1	1	303	Acinetobacter oleivorans DR1	Bacteria|Proteobacteria|Gammaproteobacteria|Pseudomonadales|Moraxellaceae|Acinetobacter|Acinetobacter oleivorans|Acinetobacter oleivorans DR1	Bacteria	Proteobacteria	Gammaproteobacteria	Pseudomonadales	Moraxellaceae	gi|298698338|gb|CP002080.1|	Acinetobacter oleivorans DR1, complete genome	436717	3049302	3049000	303	100	1e-117	92.41
Pcub_MSU1_v1_01713_0_0_1	1	1584	Stenotrophomonas maltophilia D457	Bacteria|Proteobacteria|Gammaproteobacteria|Xanthomonadales|Xanthomonadaceae|Stenotrophomonas|Stenotrophomonas maltophilia group|Stenotrophomonas maltophilia|Stenotrophomonas maltophilia D457	Bacteria	Proteobacteria	Gammaproteobacteria	Xanthomonadales	Xanthomonadaceae	gi|384076029|emb|HE798556.1|	Stenotrophomonas maltophilia D457 complete genome	1163399	3368917	3370500	1584	100	0	99.37
Pcub_MSU1_v1_01713_0_1_1	1	1752	Stenotrophomonas maltophilia D457	Bacteria|Proteobacteria|Gammaproteobacteria|Xanthomonadales|Xanthomonadaceae|Stenotrophomonas|Stenotrophomonas maltophilia group|Stenotrophomonas maltophilia|Stenotrophomonas maltophilia D457	Bacteria	Proteobacteria	Gammaproteobacteria	Xanthomonadales	Xanthomonadaceae	gi|384076029|emb|HE798556.1|	Stenotrophomonas maltophilia D457 complete genome	1163399	3366471	3368222	1752	100	0	97.66
Pcub_MSU1_v1_01717_0_1_1	1	954	Delftia sp. Cs1-4	Bacteria|Proteobacteria|Betaproteobacteria|Burkholderiales|Comamonadaceae|Delftia|Delftia sp. Cs1-4	Bacteria	Proteobacteria	Betaproteobacteria	Burkholderiales	Comamonadaceae	gi|333741867|gb|CP002735.1|	Delftia sp. Cs1-4, complete genome	742013	1416803	1415850	954	100	0	97.06
Pcub_MSU1_v1_01718_0_3_1	1	2529	Delftia sp. Cs1-4	Bacteria|Proteobacteria|Betaproteobacteria|Burkholderiales|Comamonadaceae|Delftia|Delftia sp. Cs1-4	Bacteria	Proteobacteria	Betaproteobacteria	Burkholderiales	Comamonadaceae	gi|333741867|gb|CP002735.1|	Delftia sp. Cs1-4, complete genome	742013	3177978	3175450	2529	100	0	94.39
Pcub_MSU1_v1_01731_0_1_1	1	639	Acinetobacter oleivorans DR1	Bacteria|Proteobacteria|Gammaproteobacteria|Pseudomonadales|Moraxellaceae|Acinetobacter|Acinetobacter oleivorans|Acinetobacter oleivorans DR1	Bacteria	Proteobacteria	Gammaproteobacteria	Pseudomonadales	Moraxellaceae	gi|298698338|gb|CP002080.1|	Acinetobacter oleivorans DR1, complete genome	436717	2144559	2145197	639	100	0	90.14
Pcub_MSU1_v1_01737_0_0_1	1	936	Delftia acidovorans SPH-1	Bacteria|Proteobacteria|Betaproteobacteria|Burkholderiales|Comamonadaceae|Delftia|Delftia acidovorans|Delftia acidovorans SPH-1	Bacteria	Proteobacteria	Betaproteobacteria	Burkholderiales	Comamonadaceae	gi|160361034|gb|CP000884.1|	Delftia acidovorans SPH-1, complete genome	398578	3478938	3478003	936	100	0	98.93
Pcub_MSU1_v1_01742_0_0_1	1	1755	Delftia sp. Cs1-4	Bacteria|Proteobacteria|Betaproteobacteria|Burkholderiales|Comamonadaceae|Delftia|Delftia sp. Cs1-4	Bacteria	Proteobacteria	Betaproteobacteria	Burkholderiales	Comamonadaceae	gi|333741867|gb|CP002735.1|	Delftia sp. Cs1-4, complete genome	742013	4123608	4125362	1755	100	0	95.44
Pcub_MSU1_v1_01751_0_1_1	1	837	Acinetobacter oleivorans DR1	Bacteria|Proteobacteria|Gammaproteobacteria|Pseudomonadales|Moraxellaceae|Acinetobacter|Acinetobacter oleivorans|Acinetobacter oleivorans DR1	Bacteria	Proteobacteria	Gammaproteobacteria	Pseudomonadales	Moraxellaceae	gi|298698338|gb|CP002080.1|	Acinetobacter oleivorans DR1, complete genome	436717	1173814	1172978	837	100	0	94.86
Pcub_MSU1_v1_01751_0_2_1	1	1383	Acinetobacter oleivorans DR1	Bacteria|Proteobacteria|Gammaproteobacteria|Pseudomonadales|Moraxellaceae|Acinetobacter|Acinetobacter oleivorans|Acinetobacter oleivorans DR1	Bacteria	Proteobacteria	Gammaproteobacteria	Pseudomonadales	Moraxellaceae	gi|298698338|gb|CP002080.1|	Acinetobacter oleivorans DR1, complete genome	436717	1175271	1173889	1383	100	0	96.82
Pcub_MSU1_v1_01760_0_0_1	1	612	Pseudomonas putida S12	Bacteria|Proteobacteria|Gammaproteobacteria|Pseudomonadales|Pseudomonadaceae|Pseudomonas|Pseudomonas putida group|Pseudomonas putida|Pseudomonas putida S12	Bacteria	Proteobacteria	Gammaproteobacteria	Pseudomonadales	Pseudomonadaceae	gi|734574563|gb|CP009974.1|	Pseudomonas putida S12, complete genome	1215087	2116433	2117044	612	100	0	99.35
Pcub_MSU1_v1_01760_0_1_1	1	792	Pseudomonas putida S12	Bacteria|Proteobacteria|Gammaproteobacteria|Pseudomonadales|Pseudomonadaceae|Pseudomonas|Pseudomonas putida group|Pseudomonas putida|Pseudomonas putida S12	Bacteria	Proteobacteria	Gammaproteobacteria	Pseudomonadales	Pseudomonadaceae	gi|734574563|gb|CP009974.1|	Pseudomonas putida S12, complete genome	1215087	2117710	2118501	792	100	0	99.75
Pcub_MSU1_v1_01761_0_0_1	1	1233	Acinetobacter oleivorans DR1	Bacteria|Proteobacteria|Gammaproteobacteria|Pseudomonadales|Moraxellaceae|Acinetobacter|Acinetobacter oleivorans|Acinetobacter oleivorans DR1	Bacteria	Proteobacteria	Gammaproteobacteria	Pseudomonadales	Moraxellaceae	gi|298698338|gb|CP002080.1|	Acinetobacter oleivorans DR1, complete genome	436717	372711	371479	1233	100	0	97.65
Pcub_MSU1_v1_01768_0_2_1	1	825	Delftia sp. Cs1-4	Bacteria|Proteobacteria|Betaproteobacteria|Burkholderiales|Comamonadaceae|Delftia|Delftia sp. Cs1-4	Bacteria	Proteobacteria	Betaproteobacteria	Burkholderiales	Comamonadaceae	gi|333741867|gb|CP002735.1|	Delftia sp. Cs1-4, complete genome	742013	4495593	4494769	826	100	0	96
Pcub_MSU1_v1_01775_0_7_1	1	840	Delftia acidovorans SPH-1	Bacteria|Proteobacteria|Betaproteobacteria|Burkholderiales|Comamonadaceae|Delftia|Delftia acidovorans|Delftia acidovorans SPH-1	Bacteria	Proteobacteria	Betaproteobacteria	Burkholderiales	Comamonadaceae	gi|160361034|gb|CP000884.1|	Delftia acidovorans SPH-1, complete genome	398578	6230975	6230136	840	100	0	94.88
Pcub_MSU1_v1_01779_0_5_1	1	1785	Delftia sp. Cs1-4	Bacteria|Proteobacteria|Betaproteobacteria|Burkholderiales|Comamonadaceae|Delftia|Delftia sp. Cs1-4	Bacteria	Proteobacteria	Betaproteobacteria	Burkholderiales	Comamonadaceae	gi|333741867|gb|CP002735.1|	Delftia sp. Cs1-4, complete genome	742013	899450	897666	1785	100	0	97.98
Pcub_MSU1_v1_01786_0_3_1	1	1041	Delftia acidovorans SPH-1	Bacteria|Proteobacteria|Betaproteobacteria|Burkholderiales|Comamonadaceae|Delftia|Delftia acidovorans|Delftia acidovorans SPH-1	Bacteria	Proteobacteria	Betaproteobacteria	Burkholderiales	Comamonadaceae	gi|160361034|gb|CP000884.1|	Delftia acidovorans SPH-1, complete genome	398578	1646916	1647956	1042	100	0	95.97
Pcub_MSU1_v1_01786_0_4_1	1	1383	Delftia acidovorans SPH-1	Bacteria|Proteobacteria|Betaproteobacteria|Burkholderiales|Comamonadaceae|Delftia|Delftia acidovorans|Delftia acidovorans SPH-1	Bacteria	Proteobacteria	Betaproteobacteria	Burkholderiales	Comamonadaceae	gi|160361034|gb|CP000884.1|	Delftia acidovorans SPH-1, complete genome	398578	1648004	1649386	1383	100	0	95.08
Pcub_MSU1_v1_01786_0_5_1	1	885	Delftia acidovorans SPH-1	Bacteria|Proteobacteria|Betaproteobacteria|Burkholderiales|Comamonadaceae|Delftia|Delftia acidovorans|Delftia acidovorans SPH-1	Bacteria	Proteobacteria	Betaproteobacteria	Burkholderiales	Comamonadaceae	gi|160361034|gb|CP000884.1|	Delftia acidovorans SPH-1, complete genome	398578	1649476	1650363	888	100	0	95.38
Pcub_MSU1_v1_01786_0_6_1	1	762	Delftia acidovorans SPH-1	Bacteria|Proteobacteria|Betaproteobacteria|Burkholderiales|Comamonadaceae|Delftia|Delftia acidovorans|Delftia acidovorans SPH-1	Bacteria	Proteobacteria	Betaproteobacteria	Burkholderiales	Comamonadaceae	gi|160361034|gb|CP000884.1|	Delftia acidovorans SPH-1, complete genome	398578	1650399	1651160	762	100	0	97.24
Pcub_MSU1_v1_01789_0_1_1	1	945	Acinetobacter baumannii	Bacteria|Proteobacteria|Gammaproteobacteria|Pseudomonadales|Moraxellaceae|Acinetobacter|Acinetobacter calcoaceticus/baumannii complex|Acinetobacter baumannii	Bacteria	Proteobacteria	Gammaproteobacteria	Pseudomonadales	Moraxellaceae	gi|675324095|gb|CP009256.1|	Acinetobacter baumannii strain AB031, complete genome	470	1375555	1374611	945	100	0	95.56
Pcub_MSU1_v1_01789_0_2_1	1	714	Acinetobacter baumannii	Bacteria|Proteobacteria|Gammaproteobacteria|Pseudomonadales|Moraxellaceae|Acinetobacter|Acinetobacter calcoaceticus/baumannii complex|Acinetobacter baumannii	Bacteria	Proteobacteria	Gammaproteobacteria	Pseudomonadales	Moraxellaceae	gi|884902522|gb|CP012006.1|	Acinetobacter baumannii Ab04-mff, complete genome	470	3022378	3023091	714	100	0	93.98
Pcub_MSU1_v1_01800_0_0_1	1	1560	Delftia acidovorans SPH-1	Bacteria|Proteobacteria|Betaproteobacteria|Burkholderiales|Comamonadaceae|Delftia|Delftia acidovorans|Delftia acidovorans SPH-1	Bacteria	Proteobacteria	Betaproteobacteria	Burkholderiales	Comamonadaceae	gi|160361034|gb|CP000884.1|	Delftia acidovorans SPH-1, complete genome	398578	1489356	1490915	1560	100	0	97.95
Pcub_MSU1_v1_01812_0_0_1	1	1623	Delftia acidovorans SPH-1	Bacteria|Proteobacteria|Betaproteobacteria|Burkholderiales|Comamonadaceae|Delftia|Delftia acidovorans|Delftia acidovorans SPH-1	Bacteria	Proteobacteria	Betaproteobacteria	Burkholderiales	Comamonadaceae	gi|160361034|gb|CP000884.1|	Delftia acidovorans SPH-1, complete genome	398578	3315780	3317402	1624	100	0	91.93
Pcub_MSU1_v1_01816_0_2_1	1	3342	Stenotrophomonas maltophilia D457	Bacteria|Proteobacteria|Gammaproteobacteria|Xanthomonadales|Xanthomonadaceae|Stenotrophomonas|Stenotrophomonas maltophilia group|Stenotrophomonas maltophilia|Stenotrophomonas maltophilia D457	Bacteria	Proteobacteria	Gammaproteobacteria	Xanthomonadales	Xanthomonadaceae	gi|384076029|emb|HE798556.1|	Stenotrophomonas maltophilia D457 complete genome	1163399	4741553	4738212	3342	100	0	99.31
Pcub_MSU1_v1_01819_0_1_1	1	1881	Acinetobacter oleivorans DR1	Bacteria|Proteobacteria|Gammaproteobacteria|Pseudomonadales|Moraxellaceae|Acinetobacter|Acinetobacter oleivorans|Acinetobacter oleivorans DR1	Bacteria	Proteobacteria	Gammaproteobacteria	Pseudomonadales	Moraxellaceae	gi|298698338|gb|CP002080.1|	Acinetobacter oleivorans DR1, complete genome	436717	1362534	1364414	1881	100	0	94.47
Pcub_MSU1_v1_01827_0_0_1	1	1515	Stenotrophomonas maltophilia D457	Bacteria|Proteobacteria|Gammaproteobacteria|Xanthomonadales|Xanthomonadaceae|Stenotrophomonas|Stenotrophomonas maltophilia group|Stenotrophomonas maltophilia|Stenotrophomonas maltophilia D457	Bacteria	Proteobacteria	Gammaproteobacteria	Xanthomonadales	Xanthomonadaceae	gi|384076029|emb|HE798556.1|	Stenotrophomonas maltophilia D457 complete genome	1163399	2702450	2700936	1515	100	0	99.67
Pcub_MSU1_v1_01836_0_2_1	1	975	Acidovorax sp. KKS102	Bacteria|Proteobacteria|Betaproteobacteria|Burkholderiales|Comamonadaceae|Acidovorax|Acidovorax sp. KKS102	Bacteria	Proteobacteria	Betaproteobacteria	Burkholderiales	Comamonadaceae	gi|407894523|gb|CP003872.1|	Acidovorax sp. KKS102, complete genome	358220	1068998	1068024	975	100	0	90.67
Pcub_MSU1_v1_01837_0_1_1	1	2925	Delftia sp. Cs1-4	Bacteria|Proteobacteria|Betaproteobacteria|Burkholderiales|Comamonadaceae|Delftia|Delftia sp. Cs1-4	Bacteria	Proteobacteria	Betaproteobacteria	Burkholderiales	Comamonadaceae	gi|333741867|gb|CP002735.1|	Delftia sp. Cs1-4, complete genome	742013	2446839	2443915	2925	100	0	95.76
Pcub_MSU1_v1_01842_0_0_1	1	483	Acidovorax avenae subsp. avenae ATCC 19860	Bacteria|Proteobacteria|Betaproteobacteria|Burkholderiales|Comamonadaceae|Acidovorax|Acidovorax avenae|Acidovorax avenae subsp. avenae|Acidovorax avenae subsp. avenae ATCC 19860	Bacteria	Proteobacteria	Betaproteobacteria	Burkholderiales	Comamonadaceae	gi|323371659|gb|CP002521.1|	Acidovorax avenae subsp. avenae ATCC 19860, complete genome	643561	5168350	5168832	483	100	0	94.2
Pcub_MSU1_v1_01850_0_0_1	1	711	Acinetobacter oleivorans DR1	Bacteria|Proteobacteria|Gammaproteobacteria|Pseudomonadales|Moraxellaceae|Acinetobacter|Acinetobacter oleivorans|Acinetobacter oleivorans DR1	Bacteria	Proteobacteria	Gammaproteobacteria	Pseudomonadales	Moraxellaceae	gi|298698338|gb|CP002080.1|	Acinetobacter oleivorans DR1, complete genome	436717	793270	793980	711	100	0	95.22
Pcub_MSU1_v1_01850_0_1_1	1	1836	Acinetobacter oleivorans DR1	Bacteria|Proteobacteria|Gammaproteobacteria|Pseudomonadales|Moraxellaceae|Acinetobacter|Acinetobacter oleivorans|Acinetobacter oleivorans DR1	Bacteria	Proteobacteria	Gammaproteobacteria	Pseudomonadales	Moraxellaceae	gi|298698338|gb|CP002080.1|	Acinetobacter oleivorans DR1, complete genome	436717	791420	793255	1836	100	0	97.28
Pcub_MSU1_v1_01853_0_0_1	1	819	Acidovorax avenae subsp. avenae ATCC 19860	Bacteria|Proteobacteria|Betaproteobacteria|Burkholderiales|Comamonadaceae|Acidovorax|Acidovorax avenae|Acidovorax avenae subsp. avenae|Acidovorax avenae subsp. avenae ATCC 19860	Bacteria	Proteobacteria	Betaproteobacteria	Burkholderiales	Comamonadaceae	gi|323371659|gb|CP002521.1|	Acidovorax avenae subsp. avenae ATCC 19860, complete genome	643561	1332570	1331752	821	100	0	93.91
Pcub_MSU1_v1_01854_0_0_1	1	1170	Delftia acidovorans SPH-1	Bacteria|Proteobacteria|Betaproteobacteria|Burkholderiales|Comamonadaceae|Delftia|Delftia acidovorans|Delftia acidovorans SPH-1	Bacteria	Proteobacteria	Betaproteobacteria	Burkholderiales	Comamonadaceae	gi|160361034|gb|CP000884.1|	Delftia acidovorans SPH-1, complete genome	398578	427381	428550	1170	100	0	97.09
Pcub_MSU1_v1_01854_0_1_1	1	2376	Delftia sp. Cs1-4	Bacteria|Proteobacteria|Betaproteobacteria|Burkholderiales|Comamonadaceae|Delftia|Delftia sp. Cs1-4	Bacteria	Proteobacteria	Betaproteobacteria	Burkholderiales	Comamonadaceae	gi|333741867|gb|CP002735.1|	Delftia sp. Cs1-4, complete genome	742013	436114	433726	2389	100	0	96.69
Pcub_MSU1_v1_01857_0_2_1	1	1260	Delftia acidovorans SPH-1	Bacteria|Proteobacteria|Betaproteobacteria|Burkholderiales|Comamonadaceae|Delftia|Delftia acidovorans|Delftia acidovorans SPH-1	Bacteria	Proteobacteria	Betaproteobacteria	Burkholderiales	Comamonadaceae	gi|160361034|gb|CP000884.1|	Delftia acidovorans SPH-1, complete genome	398578	1847694	1846435	1260	100	0	98.33
Pcub_MSU1_v1_01861_0_0_1	1	681	Pantholops hodgsonii	Eukaryota|Opisthokonta|Metazoa|Eumetazoa|Bilateria|Deuterostomia|Chordata|Craniata|Vertebrata|Gnathostomata|Teleostomi|Euteleostomi|Sarcopterygii|Dipnotetrapodomorpha|Tetrapoda|Amniota|Mammalia|Theria|Eutheria|Boreoeutheria|Laurasiatheria|Cetartiodactyla|Ruminantia|Pecora|Bovidae|Antilopinae|Pantholops|Pantholops hodgsonii	Eukaryota	Opisthokonta	Metazoa	Eumetazoa	Bilateria	gi|556762311|ref|XM_005976392.1|	PREDICTED: Pantholops hodgsonii O-acetylhomoserine (thiol)-lyase-like (LOC102341204), mRNA	59538	12	692	681	100	0	99.71
Pcub_MSU1_v1_01863_0_1_1	1	1203	Pseudomonas putida S12	Bacteria|Proteobacteria|Gammaproteobacteria|Pseudomonadales|Pseudomonadaceae|Pseudomonas|Pseudomonas putida group|Pseudomonas putida|Pseudomonas putida S12	Bacteria	Proteobacteria	Gammaproteobacteria	Pseudomonadales	Pseudomonadaceae	gi|734574563|gb|CP009974.1|	Pseudomonas putida S12, complete genome	1215087	51700	52902	1203	100	0	99.67
Pcub_MSU1_v1_01864_0_1_1	1	939	Delftia acidovorans SPH-1	Bacteria|Proteobacteria|Betaproteobacteria|Burkholderiales|Comamonadaceae|Delftia|Delftia acidovorans|Delftia acidovorans SPH-1	Bacteria	Proteobacteria	Betaproteobacteria	Burkholderiales	Comamonadaceae	gi|160361034|gb|CP000884.1|	Delftia acidovorans SPH-1, complete genome	398578	1636533	1637471	939	100	0	97.02
Pcub_MSU1_v1_01864_0_2_1	1	1320	Pantholops hodgsonii	Eukaryota|Opisthokonta|Metazoa|Eumetazoa|Bilateria|Deuterostomia|Chordata|Craniata|Vertebrata|Gnathostomata|Teleostomi|Euteleostomi|Sarcopterygii|Dipnotetrapodomorpha|Tetrapoda|Amniota|Mammalia|Theria|Eutheria|Boreoeutheria|Laurasiatheria|Cetartiodactyla|Ruminantia|Pecora|Bovidae|Antilopinae|Pantholops|Pantholops hodgsonii	Eukaryota	Opisthokonta	Metazoa	Eumetazoa	Bilateria	gi|556772251|ref|XM_005981230.1|	PREDICTED: Pantholops hodgsonii ATP-dependent protease ATPase subunit HslU1-like (LOC102319336), mRNA	59538	19	1338	1320	100	0	98.94
Pcub_MSU1_v1_01864_0_3_1	1	546	Pantholops hodgsonii	Eukaryota|Opisthokonta|Metazoa|Eumetazoa|Bilateria|Deuterostomia|Chordata|Craniata|Vertebrata|Gnathostomata|Teleostomi|Euteleostomi|Sarcopterygii|Dipnotetrapodomorpha|Tetrapoda|Amniota|Mammalia|Theria|Eutheria|Boreoeutheria|Laurasiatheria|Cetartiodactyla|Ruminantia|Pecora|Bovidae|Antilopinae|Pantholops|Pantholops hodgsonii	Eukaryota	Opisthokonta	Metazoa	Eumetazoa	Bilateria	gi|556772253|ref|XM_005981231.1|	PREDICTED: Pantholops hodgsonii ATP-dependent protease subunit HslV-like (LOC102319683), mRNA	59538	1	546	546	100	0	99.27
Pcub_MSU1_v1_01864_0_9_1	1	1326	Delftia acidovorans SPH-1	Bacteria|Proteobacteria|Betaproteobacteria|Burkholderiales|Comamonadaceae|Delftia|Delftia acidovorans|Delftia acidovorans SPH-1	Bacteria	Proteobacteria	Betaproteobacteria	Burkholderiales	Comamonadaceae	gi|160361034|gb|CP000884.1|	Delftia acidovorans SPH-1, complete genome	398578	1637860	1639185	1326	100	0	98.49
Pcub_MSU1_v1_01868_0_1_1	1	366	Acinetobacter oleivorans DR1	Bacteria|Proteobacteria|Gammaproteobacteria|Pseudomonadales|Moraxellaceae|Acinetobacter|Acinetobacter oleivorans|Acinetobacter oleivorans DR1	Bacteria	Proteobacteria	Gammaproteobacteria	Pseudomonadales	Moraxellaceae	gi|298698338|gb|CP002080.1|	Acinetobacter oleivorans DR1, complete genome	436717	3841346	3840981	366	100	0	99.45
Pcub_MSU1_v1_01868_0_2_1	1	429	Acinetobacter oleivorans DR1	Bacteria|Proteobacteria|Gammaproteobacteria|Pseudomonadales|Moraxellaceae|Acinetobacter|Acinetobacter oleivorans|Acinetobacter oleivorans DR1	Bacteria	Proteobacteria	Gammaproteobacteria	Pseudomonadales	Moraxellaceae	gi|298698338|gb|CP002080.1|	Acinetobacter oleivorans DR1, complete genome	436717	3843342	3842914	429	100	0	98.83
Pcub_MSU1_v1_01868_0_3_1	1	696	Acinetobacter oleivorans DR1	Bacteria|Proteobacteria|Gammaproteobacteria|Pseudomonadales|Moraxellaceae|Acinetobacter|Acinetobacter oleivorans|Acinetobacter oleivorans DR1	Bacteria	Proteobacteria	Gammaproteobacteria	Pseudomonadales	Moraxellaceae	gi|298698338|gb|CP002080.1|	Acinetobacter oleivorans DR1, complete genome	436717	3842910	3842215	696	100	0	96.98
Pcub_MSU1_v1_01869_0_1_1	1	1314	Delftia sp. Cs1-4	Bacteria|Proteobacteria|Betaproteobacteria|Burkholderiales|Comamonadaceae|Delftia|Delftia sp. Cs1-4	Bacteria	Proteobacteria	Betaproteobacteria	Burkholderiales	Comamonadaceae	gi|333741867|gb|CP002735.1|	Delftia sp. Cs1-4, complete genome	742013	781498	782811	1314	100	0	98.63
Pcub_MSU1_v1_01871_0_6_1	1	1326	Delftia acidovorans SPH-1	Bacteria|Proteobacteria|Betaproteobacteria|Burkholderiales|Comamonadaceae|Delftia|Delftia acidovorans|Delftia acidovorans SPH-1	Bacteria	Proteobacteria	Betaproteobacteria	Burkholderiales	Comamonadaceae	gi|160361034|gb|CP000884.1|	Delftia acidovorans SPH-1, complete genome	398578	6112665	6111340	1326	100	0	98.57
Pcub_MSU1_v1_01877_0_1_1	1	771	Acinetobacter oleivorans DR1	Bacteria|Proteobacteria|Gammaproteobacteria|Pseudomonadales|Moraxellaceae|Acinetobacter|Acinetobacter oleivorans|Acinetobacter oleivorans DR1	Bacteria	Proteobacteria	Gammaproteobacteria	Pseudomonadales	Moraxellaceae	gi|298698338|gb|CP002080.1|	Acinetobacter oleivorans DR1, complete genome	436717	2970233	2971003	771	100	0	91.31
Pcub_MSU1_v1_01877_0_2_1	1	1431	Acinetobacter calcoaceticus PHEA-2	Bacteria|Proteobacteria|Gammaproteobacteria|Pseudomonadales|Moraxellaceae|Acinetobacter|Acinetobacter calcoaceticus/baumannii complex|Acinetobacter calcoaceticus|Acinetobacter calcoaceticus PHEA-2	Bacteria	Proteobacteria	Gammaproteobacteria	Pseudomonadales	Moraxellaceae	gi|325121063|gb|CP002177.1|	Acinetobacter calcoaceticus PHEA-2, complete genome	871585	396699	395269	1432	100	0	92.25
Pcub_MSU1_v1_01883_0_0_1	1	1344	Acinetobacter oleivorans DR1	Bacteria|Proteobacteria|Gammaproteobacteria|Pseudomonadales|Moraxellaceae|Acinetobacter|Acinetobacter oleivorans|Acinetobacter oleivorans DR1	Bacteria	Proteobacteria	Gammaproteobacteria	Pseudomonadales	Moraxellaceae	gi|298698338|gb|CP002080.1|	Acinetobacter oleivorans DR1, complete genome	436717	1589189	1590532	1344	100	0	94.79
Pcub_MSU1_v1_01883_0_1_1	1	468	Acinetobacter oleivorans DR1	Bacteria|Proteobacteria|Gammaproteobacteria|Pseudomonadales|Moraxellaceae|Acinetobacter|Acinetobacter oleivorans|Acinetobacter oleivorans DR1	Bacteria	Proteobacteria	Gammaproteobacteria	Pseudomonadales	Moraxellaceae	gi|298698338|gb|CP002080.1|	Acinetobacter oleivorans DR1, complete genome	436717	1591957	1592424	468	100	0	96.37
Pcub_MSU1_v1_01889_0_2_1	1	1533	Stenotrophomonas maltophilia	Bacteria|Proteobacteria|Gammaproteobacteria|Xanthomonadales|Xanthomonadaceae|Stenotrophomonas|Stenotrophomonas maltophilia group|Stenotrophomonas maltophilia	Bacteria	Proteobacteria	Gammaproteobacteria	Xanthomonadales	Xanthomonadaceae	gi|674291045|gb|CP008838.1|	Stenotrophomonas maltophilia strain 13637 genome	40324	2710407	2708875	1533	100	0	92.69
Pcub_MSU1_v1_01895_0_5_1	1	918	Stenotrophomonas maltophilia D457	Bacteria|Proteobacteria|Gammaproteobacteria|Xanthomonadales|Xanthomonadaceae|Stenotrophomonas|Stenotrophomonas maltophilia group|Stenotrophomonas maltophilia|Stenotrophomonas maltophilia D457	Bacteria	Proteobacteria	Gammaproteobacteria	Xanthomonadales	Xanthomonadaceae	gi|384076029|emb|HE798556.1|	Stenotrophomonas maltophilia D457 complete genome	1163399	4723263	4722346	918	100	0	99.35
Pcub_MSU1_v1_01896_0_0_1	1	864	Delftia acidovorans SPH-1	Bacteria|Proteobacteria|Betaproteobacteria|Burkholderiales|Comamonadaceae|Delftia|Delftia acidovorans|Delftia acidovorans SPH-1	Bacteria	Proteobacteria	Betaproteobacteria	Burkholderiales	Comamonadaceae	gi|160361034|gb|CP000884.1|	Delftia acidovorans SPH-1, complete genome	398578	2841517	2840654	864	100	0	97.92
Pcub_MSU1_v1_01899_0_2_1	1	1158	Delftia acidovorans SPH-1	Bacteria|Proteobacteria|Betaproteobacteria|Burkholderiales|Comamonadaceae|Delftia|Delftia acidovorans|Delftia acidovorans SPH-1	Bacteria	Proteobacteria	Betaproteobacteria	Burkholderiales	Comamonadaceae	gi|160361034|gb|CP000884.1|	Delftia acidovorans SPH-1, complete genome	398578	2353497	2354654	1158	100	0	98.45
Pcub_MSU1_v1_01899_0_4_1	1	1320	Delftia sp. Cs1-4	Bacteria|Proteobacteria|Betaproteobacteria|Burkholderiales|Comamonadaceae|Delftia|Delftia sp. Cs1-4	Bacteria	Proteobacteria	Betaproteobacteria	Burkholderiales	Comamonadaceae	gi|333741867|gb|CP002735.1|	Delftia sp. Cs1-4, complete genome	742013	5131748	5130404	1345	100	0	96.28
Pcub_MSU1_v1_01904_0_0_1	1	879	Acinetobacter oleivorans DR1	Bacteria|Proteobacteria|Gammaproteobacteria|Pseudomonadales|Moraxellaceae|Acinetobacter|Acinetobacter oleivorans|Acinetobacter oleivorans DR1	Bacteria	Proteobacteria	Gammaproteobacteria	Pseudomonadales	Moraxellaceae	gi|298698338|gb|CP002080.1|	Acinetobacter oleivorans DR1, complete genome	436717	2844732	2845610	879	100	0	91.7
Pcub_MSU1_v1_01912_0_0_1	1	324	Pantholops hodgsonii	Eukaryota|Opisthokonta|Metazoa|Eumetazoa|Bilateria|Deuterostomia|Chordata|Craniata|Vertebrata|Gnathostomata|Teleostomi|Euteleostomi|Sarcopterygii|Dipnotetrapodomorpha|Tetrapoda|Amniota|Mammalia|Theria|Eutheria|Boreoeutheria|Laurasiatheria|Cetartiodactyla|Ruminantia|Pecora|Bovidae|Antilopinae|Pantholops|Pantholops hodgsonii	Eukaryota	Opisthokonta	Metazoa	Eumetazoa	Bilateria	gi|556764596|ref|XM_005977505.1|	PREDICTED: Pantholops hodgsonii enolase-like (LOC102323405), mRNA	59538	556	879	324	100	1e-162	99.07
Pcub_MSU1_v1_01925_0_0_1	1	468	Delftia acidovorans SPH-1	Bacteria|Proteobacteria|Betaproteobacteria|Burkholderiales|Comamonadaceae|Delftia|Delftia acidovorans|Delftia acidovorans SPH-1	Bacteria	Proteobacteria	Betaproteobacteria	Burkholderiales	Comamonadaceae	gi|160361034|gb|CP000884.1|	Delftia acidovorans SPH-1, complete genome	398578	6293885	6293418	468	100	0	97.86
Pcub_MSU1_v1_01929_0_0_1	1	1176	Acinetobacter oleivorans DR1	Bacteria|Proteobacteria|Gammaproteobacteria|Pseudomonadales|Moraxellaceae|Acinetobacter|Acinetobacter oleivorans|Acinetobacter oleivorans DR1	Bacteria	Proteobacteria	Gammaproteobacteria	Pseudomonadales	Moraxellaceae	gi|298698338|gb|CP002080.1|	Acinetobacter oleivorans DR1, complete genome	436717	643296	642121	1176	100	0	92.01
Pcub_MSU1_v1_01932_0_1_1	1	348	Stenotrophomonas acidaminiphila	Bacteria|Proteobacteria|Gammaproteobacteria|Xanthomonadales|Xanthomonadaceae|Stenotrophomonas|Stenotrophomonas acidaminiphila	Bacteria	Proteobacteria	Gammaproteobacteria	Xanthomonadales	Xanthomonadaceae	gi|938169631|gb|CP012900.1|	Stenotrophomonas acidaminiphila strain ZAC14D2_NAIMI4_2, complete genome	128780	2004827	2005174	348	100	5e-166	97.41
Pcub_MSU1_v1_01933_0_1_1	1	1728	Delftia acidovorans SPH-1	Bacteria|Proteobacteria|Betaproteobacteria|Burkholderiales|Comamonadaceae|Delftia|Delftia acidovorans|Delftia acidovorans SPH-1	Bacteria	Proteobacteria	Betaproteobacteria	Burkholderiales	Comamonadaceae	gi|160361034|gb|CP000884.1|	Delftia acidovorans SPH-1, complete genome	398578	2512029	2513756	1728	100	0	98.44
Pcub_MSU1_v1_01934_0_0_1	1	1674	Stenotrophomonas maltophilia D457	Bacteria|Proteobacteria|Gammaproteobacteria|Xanthomonadales|Xanthomonadaceae|Stenotrophomonas|Stenotrophomonas maltophilia group|Stenotrophomonas maltophilia|Stenotrophomonas maltophilia D457	Bacteria	Proteobacteria	Gammaproteobacteria	Xanthomonadales	Xanthomonadaceae	gi|384076029|emb|HE798556.1|	Stenotrophomonas maltophilia D457 complete genome	1163399	1637422	1639095	1674	100	0	98.75
Pcub_MSU1_v1_01940_0_0_1	1	2250	Acinetobacter oleivorans DR1	Bacteria|Proteobacteria|Gammaproteobacteria|Pseudomonadales|Moraxellaceae|Acinetobacter|Acinetobacter oleivorans|Acinetobacter oleivorans DR1	Bacteria	Proteobacteria	Gammaproteobacteria	Pseudomonadales	Moraxellaceae	gi|298698338|gb|CP002080.1|	Acinetobacter oleivorans DR1, complete genome	436717	2623496	2621247	2250	100	0	94.84
Pcub_MSU1_v1_01942_0_3_1	1	930	Pantholops hodgsonii	Eukaryota|Opisthokonta|Metazoa|Eumetazoa|Bilateria|Deuterostomia|Chordata|Craniata|Vertebrata|Gnathostomata|Teleostomi|Euteleostomi|Sarcopterygii|Dipnotetrapodomorpha|Tetrapoda|Amniota|Mammalia|Theria|Eutheria|Boreoeutheria|Laurasiatheria|Cetartiodactyla|Ruminantia|Pecora|Bovidae|Antilopinae|Pantholops|Pantholops hodgsonii	Eukaryota	Opisthokonta	Metazoa	Eumetazoa	Bilateria	gi|556761805|ref|XM_005976145.1|	PREDICTED: Pantholops hodgsonii prenyl transferase-like (LOC102333265), mRNA	59538	1	930	930	100	0	98.82
Pcub_MSU1_v1_01942_0_8_1	1	312	Pantholops hodgsonii	Eukaryota|Opisthokonta|Metazoa|Eumetazoa|Bilateria|Deuterostomia|Chordata|Craniata|Vertebrata|Gnathostomata|Teleostomi|Euteleostomi|Sarcopterygii|Dipnotetrapodomorpha|Tetrapoda|Amniota|Mammalia|Theria|Eutheria|Boreoeutheria|Laurasiatheria|Cetartiodactyla|Ruminantia|Pecora|Bovidae|Antilopinae|Pantholops|Pantholops hodgsonii	Eukaryota	Opisthokonta	Metazoa	Eumetazoa	Bilateria	gi|556761807|ref|XM_005976146.1|	PREDICTED: Pantholops hodgsonii 50S ribosomal protein L21, chloroplastic-like (LOC102333614), mRNA	59538	1	312	312	100	5e-161	100
Pcub_MSU1_v1_01947_0_0_1	1	939	Delftia acidovorans SPH-1	Bacteria|Proteobacteria|Betaproteobacteria|Burkholderiales|Comamonadaceae|Delftia|Delftia acidovorans|Delftia acidovorans SPH-1	Bacteria	Proteobacteria	Betaproteobacteria	Burkholderiales	Comamonadaceae	gi|160361034|gb|CP000884.1|	Delftia acidovorans SPH-1, complete genome	398578	1981834	1980896	939	100	0	99.04
Pcub_MSU1_v1_01956_0_0_1	1	1467	Delftia sp. Cs1-4	Bacteria|Proteobacteria|Betaproteobacteria|Burkholderiales|Comamonadaceae|Delftia|Delftia sp. Cs1-4	Bacteria	Proteobacteria	Betaproteobacteria	Burkholderiales	Comamonadaceae	gi|333741867|gb|CP002735.1|	Delftia sp. Cs1-4, complete genome	742013	5672863	5674329	1467	100	0	94.07
Pcub_MSU1_v1_01956_0_3_1	1	1158	Pantholops hodgsonii	Eukaryota|Opisthokonta|Metazoa|Eumetazoa|Bilateria|Deuterostomia|Chordata|Craniata|Vertebrata|Gnathostomata|Teleostomi|Euteleostomi|Sarcopterygii|Dipnotetrapodomorpha|Tetrapoda|Amniota|Mammalia|Theria|Eutheria|Boreoeutheria|Laurasiatheria|Cetartiodactyla|Ruminantia|Pecora|Bovidae|Antilopinae|Pantholops|Pantholops hodgsonii	Eukaryota	Opisthokonta	Metazoa	Eumetazoa	Bilateria	gi|556760209|ref|XM_005975363.1|	PREDICTED: Pantholops hodgsonii putative phospho-2-dehydro-3-deoxyheptonate aldolase-like (LOC102344632), mRNA	59538	1	1158	1158	100	0	99.74
Pcub_MSU1_v1_01967_0_0_1	1	633	Stenotrophomonas maltophilia D457	Bacteria|Proteobacteria|Gammaproteobacteria|Xanthomonadales|Xanthomonadaceae|Stenotrophomonas|Stenotrophomonas maltophilia group|Stenotrophomonas maltophilia|Stenotrophomonas maltophilia D457	Bacteria	Proteobacteria	Gammaproteobacteria	Xanthomonadales	Xanthomonadaceae	gi|384076029|emb|HE798556.1|	Stenotrophomonas maltophilia D457 complete genome	1163399	2100145	2100777	633	100	0	97.31
Pcub_MSU1_v1_01975_0_0_1	1	957	Monomorium pharaonis	Eukaryota|Opisthokonta|Metazoa|Eumetazoa|Bilateria|Protostomia|Ecdysozoa|Panarthropoda|Arthropoda|Mandibulata|Pancrustacea|Hexapoda|Insecta|Dicondylia|Pterygota|Neoptera|Endopterygota|Hymenoptera|Apocrita|Aculeata|Vespoidea|Formicidae|Myrmicinae|Solenopsidini|Monomorium|Monomorium pharaonis	Eukaryota	Opisthokonta	Metazoa	Eumetazoa	Bilateria	gi|826414126|ref|XM_012666276.1|	PREDICTED: Monomorium pharaonis probable voltage-gated potassium channel subunit beta (LOC105828075), mRNA	307658	1	957	957	100	0	94.46
Pcub_MSU1_v1_01980_0_0_1	1	1851	Delftia sp. Cs1-4	Bacteria|Proteobacteria|Betaproteobacteria|Burkholderiales|Comamonadaceae|Delftia|Delftia sp. Cs1-4	Bacteria	Proteobacteria	Betaproteobacteria	Burkholderiales	Comamonadaceae	gi|333741867|gb|CP002735.1|	Delftia sp. Cs1-4, complete genome	742013	5525483	5527333	1851	100	0	97.89
Pcub_MSU1_v1_01983_0_1_1	1	960	Acinetobacter oleivorans DR1	Bacteria|Proteobacteria|Gammaproteobacteria|Pseudomonadales|Moraxellaceae|Acinetobacter|Acinetobacter oleivorans|Acinetobacter oleivorans DR1	Bacteria	Proteobacteria	Gammaproteobacteria	Pseudomonadales	Moraxellaceae	gi|298698338|gb|CP002080.1|	Acinetobacter oleivorans DR1, complete genome	436717	1779759	1780718	960	100	0	95.42
Pcub_MSU1_v1_01983_0_2_1	1	2232	Acinetobacter oleivorans DR1	Bacteria|Proteobacteria|Gammaproteobacteria|Pseudomonadales|Moraxellaceae|Acinetobacter|Acinetobacter oleivorans|Acinetobacter oleivorans DR1	Bacteria	Proteobacteria	Gammaproteobacteria	Pseudomonadales	Moraxellaceae	gi|298698338|gb|CP002080.1|	Acinetobacter oleivorans DR1, complete genome	436717	1776737	1778968	2232	100	0	95.47
Pcub_MSU1_v1_01984_0_1_1	1	3231	Delftia acidovorans SPH-1	Bacteria|Proteobacteria|Betaproteobacteria|Burkholderiales|Comamonadaceae|Delftia|Delftia acidovorans|Delftia acidovorans SPH-1	Bacteria	Proteobacteria	Betaproteobacteria	Burkholderiales	Comamonadaceae	gi|160361034|gb|CP000884.1|	Delftia acidovorans SPH-1, complete genome	398578	1347127	1350355	3231	100	0	97.49
Pcub_MSU1_v1_01993_0_2_1	1	609	Delftia sp. Cs1-4	Bacteria|Proteobacteria|Betaproteobacteria|Burkholderiales|Comamonadaceae|Delftia|Delftia sp. Cs1-4	Bacteria	Proteobacteria	Betaproteobacteria	Burkholderiales	Comamonadaceae	gi|333741867|gb|CP002735.1|	Delftia sp. Cs1-4, complete genome	742013	6333560	6334168	609	100	0	98.36
Pcub_MSU1_v1_01995_0_1_1	1	1359	Delftia sp. Cs1-4	Bacteria|Proteobacteria|Betaproteobacteria|Burkholderiales|Comamonadaceae|Delftia|Delftia sp. Cs1-4	Bacteria	Proteobacteria	Betaproteobacteria	Burkholderiales	Comamonadaceae	gi|333741867|gb|CP002735.1|	Delftia sp. Cs1-4, complete genome	742013	6291684	6293042	1359	100	0	94.92
Pcub_MSU1_v1_01995_0_5_1	1	1509	Delftia sp. Cs1-4	Bacteria|Proteobacteria|Betaproteobacteria|Burkholderiales|Comamonadaceae|Delftia|Delftia sp. Cs1-4	Bacteria	Proteobacteria	Betaproteobacteria	Burkholderiales	Comamonadaceae	gi|333741867|gb|CP002735.1|	Delftia sp. Cs1-4, complete genome	742013	6296830	6295322	1509	100	0	98.01
Pcub_MSU1_v1_01997_0_0_1	1	1041	Delftia sp. Cs1-4	Bacteria|Proteobacteria|Betaproteobacteria|Burkholderiales|Comamonadaceae|Delftia|Delftia sp. Cs1-4	Bacteria	Proteobacteria	Betaproteobacteria	Burkholderiales	Comamonadaceae	gi|333741867|gb|CP002735.1|	Delftia sp. Cs1-4, complete genome	742013	5410562	5411602	1041	100	0	98.46
Pcub_MSU1_v1_02000_0_0_1	1	2268	Delftia sp. Cs1-4	Bacteria|Proteobacteria|Betaproteobacteria|Burkholderiales|Comamonadaceae|Delftia|Delftia sp. Cs1-4	Bacteria	Proteobacteria	Betaproteobacteria	Burkholderiales	Comamonadaceae	gi|333741867|gb|CP002735.1|	Delftia sp. Cs1-4, complete genome	742013	1107965	1105698	2268	100	0	98.94
Pcub_MSU1_v1_02012_0_0_1	1	366	Acinetobacter calcoaceticus PHEA-2	Bacteria|Proteobacteria|Gammaproteobacteria|Pseudomonadales|Moraxellaceae|Acinetobacter|Acinetobacter calcoaceticus/baumannii complex|Acinetobacter calcoaceticus|Acinetobacter calcoaceticus PHEA-2	Bacteria	Proteobacteria	Gammaproteobacteria	Pseudomonadales	Moraxellaceae	gi|325121063|gb|CP002177.1|	Acinetobacter calcoaceticus PHEA-2, complete genome	871585	915144	914779	366	100	3e-164	95.63
Pcub_MSU1_v1_02012_0_1_1	1	1218	Acinetobacter oleivorans DR1	Bacteria|Proteobacteria|Gammaproteobacteria|Pseudomonadales|Moraxellaceae|Acinetobacter|Acinetobacter oleivorans|Acinetobacter oleivorans DR1	Bacteria	Proteobacteria	Gammaproteobacteria	Pseudomonadales	Moraxellaceae	gi|298698338|gb|CP002080.1|	Acinetobacter oleivorans DR1, complete genome	436717	2423773	2424990	1219	100	0	93.93
Pcub_MSU1_v1_02015_0_0_1	1	528	Acidovorax avenae subsp. avenae ATCC 19860	Bacteria|Proteobacteria|Betaproteobacteria|Burkholderiales|Comamonadaceae|Acidovorax|Acidovorax avenae|Acidovorax avenae subsp. avenae|Acidovorax avenae subsp. avenae ATCC 19860	Bacteria	Proteobacteria	Betaproteobacteria	Burkholderiales	Comamonadaceae	gi|323371659|gb|CP002521.1|	Acidovorax avenae subsp. avenae ATCC 19860, complete genome	643561	5120623	5120114	528	100	0	90.15
Pcub_MSU1_v1_02021_0_2_1	1	1437	Delftia acidovorans SPH-1	Bacteria|Proteobacteria|Betaproteobacteria|Burkholderiales|Comamonadaceae|Delftia|Delftia acidovorans|Delftia acidovorans SPH-1	Bacteria	Proteobacteria	Betaproteobacteria	Burkholderiales	Comamonadaceae	gi|160361034|gb|CP000884.1|	Delftia acidovorans SPH-1, complete genome	398578	3127497	3126061	1437	100	0	97.63
Pcub_MSU1_v1_02021_0_4_1	1	795	Pantholops hodgsonii	Eukaryota|Opisthokonta|Metazoa|Eumetazoa|Bilateria|Deuterostomia|Chordata|Craniata|Vertebrata|Gnathostomata|Teleostomi|Euteleostomi|Sarcopterygii|Dipnotetrapodomorpha|Tetrapoda|Amniota|Mammalia|Theria|Eutheria|Boreoeutheria|Laurasiatheria|Cetartiodactyla|Ruminantia|Pecora|Bovidae|Antilopinae|Pantholops|Pantholops hodgsonii	Eukaryota	Opisthokonta	Metazoa	Eumetazoa	Bilateria	gi|556760855|ref|XM_005975681.1|	PREDICTED: Pantholops hodgsonii 3-oxoacyl-[acyl-carrier-protein] reductase 3, chloroplastic-like (LOC102333147), mRNA	59538	40	834	795	100	0	99.5
Pcub_MSU1_v1_02029_0_3_1	1	351	Pseudomonas putida S13.1.2	Bacteria|Proteobacteria|Gammaproteobacteria|Pseudomonadales|Pseudomonadaceae|Pseudomonas|Pseudomonas putida group|Pseudomonas putida|Pseudomonas putida S13.1.2	Bacteria	Proteobacteria	Gammaproteobacteria	Pseudomonadales	Pseudomonadaceae	gi|764072275|gb|CP010979.1|	Pseudomonas putida S13.1.2, complete genome	1384061	4481669	4481319	351	100	0	100
Pcub_MSU1_v1_02029_0_5_1	1	501	Pseudomonas putida S12	Bacteria|Proteobacteria|Gammaproteobacteria|Pseudomonadales|Pseudomonadaceae|Pseudomonas|Pseudomonas putida group|Pseudomonas putida|Pseudomonas putida S12	Bacteria	Proteobacteria	Gammaproteobacteria	Pseudomonadales	Pseudomonadaceae	gi|734574563|gb|CP009974.1|	Pseudomonas putida S12, complete genome	1215087	1545963	1545463	501	100	0	100
Pcub_MSU1_v1_02029_0_8_1	1	435	Pseudomonas putida NBRC 14164	Bacteria|Proteobacteria|Gammaproteobacteria|Pseudomonadales|Pseudomonadaceae|Pseudomonas|Pseudomonas putida group|Pseudomonas putida|Pseudomonas putida NBRC 14164	Bacteria	Proteobacteria	Gammaproteobacteria	Pseudomonadales	Pseudomonadaceae	gi|512381003|dbj|AP013070.1|	Pseudomonas putida NBRC 14164 DNA, complete genome	1211579	584854	585288	435	100	0	96.55
Pcub_MSU1_v1_02029_0_9_1	1	405	Pantholops hodgsonii	Eukaryota|Opisthokonta|Metazoa|Eumetazoa|Bilateria|Deuterostomia|Chordata|Craniata|Vertebrata|Gnathostomata|Teleostomi|Euteleostomi|Sarcopterygii|Dipnotetrapodomorpha|Tetrapoda|Amniota|Mammalia|Theria|Eutheria|Boreoeutheria|Laurasiatheria|Cetartiodactyla|Ruminantia|Pecora|Bovidae|Antilopinae|Pantholops|Pantholops hodgsonii	Eukaryota	Opisthokonta	Metazoa	Eumetazoa	Bilateria	gi|556764680|ref|XM_005977547.1|	PREDICTED: Pantholops hodgsonii 30S ribosomal protein S11, chloroplastic-like (LOC102339681), mRNA	59538	1	405	405	100	0	99.75
Pcub_MSU1_v1_02034_0_1_1	1	219	Cucumis hystrix	Eukaryota|Viridiplantae|Streptophyta|Streptophytina|Embryophyta|Tracheophyta|Euphyllophyta|Spermatophyta|Magnoliophyta|Mesangiospermae|eudicotyledons|Gunneridae|Pentapetalae|rosids|fabids|Cucurbitales|Cucurbitaceae|Benincaseae|Cucumis|Cucumis hystrix	Eukaryota	Viridiplantae	Streptophyta	Streptophytina	Embryophyta	gi|586598666|gb|KF957866.1|	Cucumis hystrix plastid, complete genome	396994	72579	72361	219	100	2e-109	100
Pcub_MSU1_v1_02056_0_0_1	1	852	Stenotrophomonas maltophilia D457	Bacteria|Proteobacteria|Gammaproteobacteria|Xanthomonadales|Xanthomonadaceae|Stenotrophomonas|Stenotrophomonas maltophilia group|Stenotrophomonas maltophilia|Stenotrophomonas maltophilia D457	Bacteria	Proteobacteria	Gammaproteobacteria	Xanthomonadales	Xanthomonadaceae	gi|384076029|emb|HE798556.1|	Stenotrophomonas maltophilia D457 complete genome	1163399	3481983	3481132	852	100	0	98.94
Pcub_MSU1_v1_02056_0_2_1	1	489	Stenotrophomonas maltophilia D457	Bacteria|Proteobacteria|Gammaproteobacteria|Xanthomonadales|Xanthomonadaceae|Stenotrophomonas|Stenotrophomonas maltophilia group|Stenotrophomonas maltophilia|Stenotrophomonas maltophilia D457	Bacteria	Proteobacteria	Gammaproteobacteria	Xanthomonadales	Xanthomonadaceae	gi|384076029|emb|HE798556.1|	Stenotrophomonas maltophilia D457 complete genome	1163399	3477553	3478041	489	100	0	97.34
Pcub_MSU1_v1_02059_0_2_1	1	2148	Stenotrophomonas maltophilia D457	Bacteria|Proteobacteria|Gammaproteobacteria|Xanthomonadales|Xanthomonadaceae|Stenotrophomonas|Stenotrophomonas maltophilia group|Stenotrophomonas maltophilia|Stenotrophomonas maltophilia D457	Bacteria	Proteobacteria	Gammaproteobacteria	Xanthomonadales	Xanthomonadaceae	gi|384076029|emb|HE798556.1|	Stenotrophomonas maltophilia D457 complete genome	1163399	2950095	2952255	2161	100	0	92.87
Pcub_MSU1_v1_02060_0_0_1	1	1173	Acinetobacter calcoaceticus PHEA-2	Bacteria|Proteobacteria|Gammaproteobacteria|Pseudomonadales|Moraxellaceae|Acinetobacter|Acinetobacter calcoaceticus/baumannii complex|Acinetobacter calcoaceticus|Acinetobacter calcoaceticus PHEA-2	Bacteria	Proteobacteria	Gammaproteobacteria	Pseudomonadales	Moraxellaceae	gi|325121063|gb|CP002177.1|	Acinetobacter calcoaceticus PHEA-2, complete genome	871585	1697319	1698491	1173	100	0	92.07
Pcub_MSU1_v1_02067_0_0_1	1	1227	Delftia sp. Cs1-4	Bacteria|Proteobacteria|Betaproteobacteria|Burkholderiales|Comamonadaceae|Delftia|Delftia sp. Cs1-4	Bacteria	Proteobacteria	Betaproteobacteria	Burkholderiales	Comamonadaceae	gi|333741867|gb|CP002735.1|	Delftia sp. Cs1-4, complete genome	742013	6415829	6417055	1227	100	0	98.21
Pcub_MSU1_v1_02067_0_1_1	1	864	Delftia acidovorans SPH-1	Bacteria|Proteobacteria|Betaproteobacteria|Burkholderiales|Comamonadaceae|Delftia|Delftia acidovorans|Delftia acidovorans SPH-1	Bacteria	Proteobacteria	Betaproteobacteria	Burkholderiales	Comamonadaceae	gi|160361034|gb|CP000884.1|	Delftia acidovorans SPH-1, complete genome	398578	925955	925092	864	100	0	98.5
Pcub_MSU1_v1_02079_0_2_1	1	480	Pantholops hodgsonii	Eukaryota|Opisthokonta|Metazoa|Eumetazoa|Bilateria|Deuterostomia|Chordata|Craniata|Vertebrata|Gnathostomata|Teleostomi|Euteleostomi|Sarcopterygii|Dipnotetrapodomorpha|Tetrapoda|Amniota|Mammalia|Theria|Eutheria|Boreoeutheria|Laurasiatheria|Cetartiodactyla|Ruminantia|Pecora|Bovidae|Antilopinae|Pantholops|Pantholops hodgsonii	Eukaryota	Opisthokonta	Metazoa	Eumetazoa	Bilateria	gi|556740210|ref|XM_005965590.1|	PREDICTED: Pantholops hodgsonii NADH-ubiquinone oxidoreductase 20 kDa subunit-like (LOC102343740), mRNA	59538	1	480	480	100	0	100
Pcub_MSU1_v1_02090_0_0_1	1	642	Acinetobacter oleivorans DR1	Bacteria|Proteobacteria|Gammaproteobacteria|Pseudomonadales|Moraxellaceae|Acinetobacter|Acinetobacter oleivorans|Acinetobacter oleivorans DR1	Bacteria	Proteobacteria	Gammaproteobacteria	Pseudomonadales	Moraxellaceae	gi|298698338|gb|CP002080.1|	Acinetobacter oleivorans DR1, complete genome	436717	2180575	2181216	642	100	0	92.83
Pcub_MSU1_v1_02090_0_1_1	1	705	Acinetobacter oleivorans DR1	Bacteria|Proteobacteria|Gammaproteobacteria|Pseudomonadales|Moraxellaceae|Acinetobacter|Acinetobacter oleivorans|Acinetobacter oleivorans DR1	Bacteria	Proteobacteria	Gammaproteobacteria	Pseudomonadales	Moraxellaceae	gi|298698338|gb|CP002080.1|	Acinetobacter oleivorans DR1, complete genome	436717	2179869	2180573	705	100	0	93.33
Pcub_MSU1_v1_02090_0_2_1	1	1221	Acinetobacter calcoaceticus PHEA-2	Bacteria|Proteobacteria|Gammaproteobacteria|Pseudomonadales|Moraxellaceae|Acinetobacter|Acinetobacter calcoaceticus/baumannii complex|Acinetobacter calcoaceticus|Acinetobacter calcoaceticus PHEA-2	Bacteria	Proteobacteria	Gammaproteobacteria	Pseudomonadales	Moraxellaceae	gi|325121063|gb|CP002177.1|	Acinetobacter calcoaceticus PHEA-2, complete genome	871585	1147601	1146381	1222	100	0	91.16
Pcub_MSU1_v1_02091_0_0_1	1	1569	Delftia acidovorans SPH-1	Bacteria|Proteobacteria|Betaproteobacteria|Burkholderiales|Comamonadaceae|Delftia|Delftia acidovorans|Delftia acidovorans SPH-1	Bacteria	Proteobacteria	Betaproteobacteria	Burkholderiales	Comamonadaceae	gi|160361034|gb|CP000884.1|	Delftia acidovorans SPH-1, complete genome	398578	5535800	5534229	1573	100	0	94.34
Pcub_MSU1_v1_02091_0_3_1	1	1386	Delftia sp. Cs1-4	Bacteria|Proteobacteria|Betaproteobacteria|Burkholderiales|Comamonadaceae|Delftia|Delftia sp. Cs1-4	Bacteria	Proteobacteria	Betaproteobacteria	Burkholderiales	Comamonadaceae	gi|333741867|gb|CP002735.1|	Delftia sp. Cs1-4, complete genome	742013	1827146	1828531	1386	100	0	97.47
Pcub_MSU1_v1_02098_0_0_1	1	2040	Acinetobacter oleivorans DR1	Bacteria|Proteobacteria|Gammaproteobacteria|Pseudomonadales|Moraxellaceae|Acinetobacter|Acinetobacter oleivorans|Acinetobacter oleivorans DR1	Bacteria	Proteobacteria	Gammaproteobacteria	Pseudomonadales	Moraxellaceae	gi|298698338|gb|CP002080.1|	Acinetobacter oleivorans DR1, complete genome	436717	478878	476839	2041	100	0	90.1
Pcub_MSU1_v1_02098_0_1_1	1	2058	Acinetobacter oleivorans DR1	Bacteria|Proteobacteria|Gammaproteobacteria|Pseudomonadales|Moraxellaceae|Acinetobacter|Acinetobacter oleivorans|Acinetobacter oleivorans DR1	Bacteria	Proteobacteria	Gammaproteobacteria	Pseudomonadales	Moraxellaceae	gi|298698338|gb|CP002080.1|	Acinetobacter oleivorans DR1, complete genome	436717	481087	479030	2059	100	0	91.6
Pcub_MSU1_v1_02102_0_0_1	1	2655	Delftia tsuruhatensis	Bacteria|Proteobacteria|Betaproteobacteria|Burkholderiales|Comamonadaceae|Delftia|Delftia tsuruhatensis	Bacteria	Proteobacteria	Betaproteobacteria	Burkholderiales	Comamonadaceae	gi|149774731|gb|EF469602.1|	Delftia tsuruhatensis conserved hypothetical protein (lf1) gene, partial cds; conserved hypothetical protein (lf2), hypothetical protein (lf3), and hypothetical protein (lf4) genes, complete cds; In3-4 integron integrase (intI3), hypothetical protein (orfA), hypothetical protein (orfB), hypothetical protein (orfC), unknown (orfD), and hypothetical protein (orfE) genes, complete cds; putative inte…	180282	13495	16161	2667	100	0	99.29
Pcub_MSU1_v1_02106_0_0_1	1	1461	Acinetobacter oleivorans DR1	Bacteria|Proteobacteria|Gammaproteobacteria|Pseudomonadales|Moraxellaceae|Acinetobacter|Acinetobacter oleivorans|Acinetobacter oleivorans DR1	Bacteria	Proteobacteria	Gammaproteobacteria	Pseudomonadales	Moraxellaceae	gi|298698338|gb|CP002080.1|	Acinetobacter oleivorans DR1, complete genome	436717	648562	647102	1463	100	0	92.07
Pcub_MSU1_v1_02107_0_0_1	1	2925	Enterobacter asburiae L1	Bacteria|Proteobacteria|Gammaproteobacteria|Enterobacteriales|Enterobacteriaceae|Enterobacter|Enterobacter cloacae complex|Enterobacter asburiae|Enterobacter asburiae L1	Bacteria	Proteobacteria	Gammaproteobacteria	Enterobacteriales	Enterobacteriaceae	gi|612150118|gb|CP007546.1|	Enterobacter asburiae L1, complete genome	1421338	3697704	3694780	2925	100	0	95.97
Pcub_MSU1_v1_02109_0_0_1	1	990	Delftia sp. Cs1-4	Bacteria|Proteobacteria|Betaproteobacteria|Burkholderiales|Comamonadaceae|Delftia|Delftia sp. Cs1-4	Bacteria	Proteobacteria	Betaproteobacteria	Burkholderiales	Comamonadaceae	gi|333741867|gb|CP002735.1|	Delftia sp. Cs1-4, complete genome	742013	715471	716454	990	100	0	93.84
Pcub_MSU1_v1_02110_0_1_1	1	1329	Delftia sp. Cs1-4	Bacteria|Proteobacteria|Betaproteobacteria|Burkholderiales|Comamonadaceae|Delftia|Delftia sp. Cs1-4	Bacteria	Proteobacteria	Betaproteobacteria	Burkholderiales	Comamonadaceae	gi|333741867|gb|CP002735.1|	Delftia sp. Cs1-4, complete genome	742013	6044737	6043409	1329	100	0	97.74
Pcub_MSU1_v1_02110_0_2_1	1	984	Delftia sp. Cs1-4	Bacteria|Proteobacteria|Betaproteobacteria|Burkholderiales|Comamonadaceae|Delftia|Delftia sp. Cs1-4	Bacteria	Proteobacteria	Betaproteobacteria	Burkholderiales	Comamonadaceae	gi|333741867|gb|CP002735.1|	Delftia sp. Cs1-4, complete genome	742013	6042040	6043023	984	100	0	97.36
Pcub_MSU1_v1_02110_0_5_1	1	1770	Delftia acidovorans SPH-1	Bacteria|Proteobacteria|Betaproteobacteria|Burkholderiales|Comamonadaceae|Delftia|Delftia acidovorans|Delftia acidovorans SPH-1	Bacteria	Proteobacteria	Betaproteobacteria	Burkholderiales	Comamonadaceae	gi|160361034|gb|CP000884.1|	Delftia acidovorans SPH-1, complete genome	398578	1275831	1274055	1795	100	0	90.7
Pcub_MSU1_v1_02114_0_0_1	1	387	Pantholops hodgsonii	Eukaryota|Opisthokonta|Metazoa|Eumetazoa|Bilateria|Deuterostomia|Chordata|Craniata|Vertebrata|Gnathostomata|Teleostomi|Euteleostomi|Sarcopterygii|Dipnotetrapodomorpha|Tetrapoda|Amniota|Mammalia|Theria|Eutheria|Boreoeutheria|Laurasiatheria|Cetartiodactyla|Ruminantia|Pecora|Bovidae|Antilopinae|Pantholops|Pantholops hodgsonii	Eukaryota	Opisthokonta	Metazoa	Eumetazoa	Bilateria	gi|556756444|ref|XM_005973510.1|	PREDICTED: Pantholops hodgsonii mitochondrial DNA repair protein recA homolog (LOC102330764), mRNA	59538	718	1104	387	100	0	97.93
Pcub_MSU1_v1_02114_0_1_1	1	405	Delftia sp. Cs1-4	Bacteria|Proteobacteria|Betaproteobacteria|Burkholderiales|Comamonadaceae|Delftia|Delftia sp. Cs1-4	Bacteria	Proteobacteria	Betaproteobacteria	Burkholderiales	Comamonadaceae	gi|333741867|gb|CP002735.1|	Delftia sp. Cs1-4, complete genome	742013	6360899	6361303	405	100	0	99.51
Pcub_MSU1_v1_02114_0_4_1	1	933	Delftia sp. Cs1-4	Bacteria|Proteobacteria|Betaproteobacteria|Burkholderiales|Comamonadaceae|Delftia|Delftia sp. Cs1-4	Bacteria	Proteobacteria	Betaproteobacteria	Burkholderiales	Comamonadaceae	gi|333741867|gb|CP002735.1|	Delftia sp. Cs1-4, complete genome	742013	6360462	6359530	933	100	0	92.71
Pcub_MSU1_v1_02116_0_0_1	1	2316	Stenotrophomonas maltophilia D457	Bacteria|Proteobacteria|Gammaproteobacteria|Xanthomonadales|Xanthomonadaceae|Stenotrophomonas|Stenotrophomonas maltophilia group|Stenotrophomonas maltophilia|Stenotrophomonas maltophilia D457	Bacteria	Proteobacteria	Gammaproteobacteria	Xanthomonadales	Xanthomonadaceae	gi|384076029|emb|HE798556.1|	Stenotrophomonas maltophilia D457 complete genome	1163399	3350763	3348448	2316	100	0	99.83
Pcub_MSU1_v1_02123_0_0_1	1	1977	Stenotrophomonas maltophilia D457	Bacteria|Proteobacteria|Gammaproteobacteria|Xanthomonadales|Xanthomonadaceae|Stenotrophomonas|Stenotrophomonas maltophilia group|Stenotrophomonas maltophilia|Stenotrophomonas maltophilia D457	Bacteria	Proteobacteria	Gammaproteobacteria	Xanthomonadales	Xanthomonadaceae	gi|384076029|emb|HE798556.1|	Stenotrophomonas maltophilia D457 complete genome	1163399	4455062	4453086	1977	100	0	99.49
Pcub_MSU1_v1_02123_0_3_1	1	591	Stenotrophomonas maltophilia D457	Bacteria|Proteobacteria|Gammaproteobacteria|Xanthomonadales|Xanthomonadaceae|Stenotrophomonas|Stenotrophomonas maltophilia group|Stenotrophomonas maltophilia|Stenotrophomonas maltophilia D457	Bacteria	Proteobacteria	Gammaproteobacteria	Xanthomonadales	Xanthomonadaceae	gi|384076029|emb|HE798556.1|	Stenotrophomonas maltophilia D457 complete genome	1163399	4452018	4451428	591	100	0	99.49
Pcub_MSU1_v1_02124_0_2_1	1	1152	Acinetobacter baumannii	Bacteria|Proteobacteria|Gammaproteobacteria|Pseudomonadales|Moraxellaceae|Acinetobacter|Acinetobacter calcoaceticus/baumannii complex|Acinetobacter baumannii	Bacteria	Proteobacteria	Gammaproteobacteria	Pseudomonadales	Moraxellaceae	gi|742999896|gb|CP010397.1|	Acinetobacter baumannii strain 6200, complete genome	470	2265910	2267061	1152	100	0	90.89
Pcub_MSU1_v1_02126_0_0_1	1	1497	Stenotrophomonas maltophilia D457	Bacteria|Proteobacteria|Gammaproteobacteria|Xanthomonadales|Xanthomonadaceae|Stenotrophomonas|Stenotrophomonas maltophilia group|Stenotrophomonas maltophilia|Stenotrophomonas maltophilia D457	Bacteria	Proteobacteria	Gammaproteobacteria	Xanthomonadales	Xanthomonadaceae	gi|384076029|emb|HE798556.1|	Stenotrophomonas maltophilia D457 complete genome	1163399	1993910	1992414	1497	100	0	98.2
Pcub_MSU1_v1_02126_0_1_1	1	2601	Stenotrophomonas maltophilia JV3	Bacteria|Proteobacteria|Gammaproteobacteria|Xanthomonadales|Xanthomonadaceae|Stenotrophomonas|Stenotrophomonas maltophilia group|Stenotrophomonas maltophilia|Stenotrophomonas maltophilia JV3	Bacteria	Proteobacteria	Gammaproteobacteria	Xanthomonadales	Xanthomonadaceae	gi|343776783|gb|CP002986.1|	Stenotrophomonas maltophilia JV3, complete genome	868597	1808450	1811050	2602	100	0	92.93
Pcub_MSU1_v1_02130_0_2_1	1	1080	Delftia sp. Cs1-4	Bacteria|Proteobacteria|Betaproteobacteria|Burkholderiales|Comamonadaceae|Delftia|Delftia sp. Cs1-4	Bacteria	Proteobacteria	Betaproteobacteria	Burkholderiales	Comamonadaceae	gi|333741867|gb|CP002735.1|	Delftia sp. Cs1-4, complete genome	742013	5050791	5051887	1097	100	0	97.63
Pcub_MSU1_v1_02133_0_2_1	1	576	Delftia acidovorans SPH-1	Bacteria|Proteobacteria|Betaproteobacteria|Burkholderiales|Comamonadaceae|Delftia|Delftia acidovorans|Delftia acidovorans SPH-1	Bacteria	Proteobacteria	Betaproteobacteria	Burkholderiales	Comamonadaceae	gi|160361034|gb|CP000884.1|	Delftia acidovorans SPH-1, complete genome	398578	2564011	2563436	576	100	0	96.01
Pcub_MSU1_v1_02134_0_1_1	1	783	Stenotrophomonas maltophilia	Bacteria|Proteobacteria|Gammaproteobacteria|Xanthomonadales|Xanthomonadaceae|Stenotrophomonas|Stenotrophomonas maltophilia group|Stenotrophomonas maltophilia	Bacteria	Proteobacteria	Gammaproteobacteria	Xanthomonadales	Xanthomonadaceae	gi|674291045|gb|CP008838.1|	Stenotrophomonas maltophilia strain 13637 genome	40324	1749324	1750106	783	100	0	92.72
Pcub_MSU1_v1_02135_0_0_1	1	1263	Pantholops hodgsonii	Eukaryota|Opisthokonta|Metazoa|Eumetazoa|Bilateria|Deuterostomia|Chordata|Craniata|Vertebrata|Gnathostomata|Teleostomi|Euteleostomi|Sarcopterygii|Dipnotetrapodomorpha|Tetrapoda|Amniota|Mammalia|Theria|Eutheria|Boreoeutheria|Laurasiatheria|Cetartiodactyla|Ruminantia|Pecora|Bovidae|Antilopinae|Pantholops|Pantholops hodgsonii	Eukaryota	Opisthokonta	Metazoa	Eumetazoa	Bilateria	gi|556757626|ref|XM_005974093.1|	PREDICTED: Pantholops hodgsonii ATP synthase subunit alpha, chloroplastic-like (LOC102319149), mRNA	59538	1	1263	1263	100	0	99.52
Pcub_MSU1_v1_02135_0_1_1	1	333	Pantholops hodgsonii	Eukaryota|Opisthokonta|Metazoa|Eumetazoa|Bilateria|Deuterostomia|Chordata|Craniata|Vertebrata|Gnathostomata|Teleostomi|Euteleostomi|Sarcopterygii|Dipnotetrapodomorpha|Tetrapoda|Amniota|Mammalia|Theria|Eutheria|Boreoeutheria|Laurasiatheria|Cetartiodactyla|Ruminantia|Pecora|Bovidae|Antilopinae|Pantholops|Pantholops hodgsonii	Eukaryota	Opisthokonta	Metazoa	Eumetazoa	Bilateria	gi|556757628|ref|XM_005974094.1|	PREDICTED: Pantholops hodgsonii thioredoxin-like (LOC102319509), mRNA	59538	1	333	333	100	5e-171	99.7
Pcub_MSU1_v1_02135_0_2_1	1	1086	Culex quinquefasciatus	Eukaryota|Opisthokonta|Metazoa|Eumetazoa|Bilateria|Protostomia|Ecdysozoa|Panarthropoda|Arthropoda|Mandibulata|Pancrustacea|Hexapoda|Insecta|Dicondylia|Pterygota|Neoptera|Endopterygota|Diptera|Nematocera|Culicomorpha|Culicoidea|Culicidae|Culicinae|Culicini|Culex|Culex|Culex pipiens complex|Culex quinquefasciatus	Eukaryota	Opisthokonta	Metazoa	Eumetazoa	Bilateria	gi|78190082|gb|AC168047.3|	Culex pipiens quinquefasciatus, clone Culex pipiens quinquefasciatus-3940115D9, complete sequence	7176	86124	87212	1089	100	0	95.59
Pcub_MSU1_v1_02139_0_0_1	1	951	Delftia acidovorans SPH-1	Bacteria|Proteobacteria|Betaproteobacteria|Burkholderiales|Comamonadaceae|Delftia|Delftia acidovorans|Delftia acidovorans SPH-1	Bacteria	Proteobacteria	Betaproteobacteria	Burkholderiales	Comamonadaceae	gi|160361034|gb|CP000884.1|	Delftia acidovorans SPH-1, complete genome	398578	4421870	4422820	951	100	0	98.32
Pcub_MSU1_v1_02139_0_1_1	1	987	Delftia acidovorans SPH-1	Bacteria|Proteobacteria|Betaproteobacteria|Burkholderiales|Comamonadaceae|Delftia|Delftia acidovorans|Delftia acidovorans SPH-1	Bacteria	Proteobacteria	Betaproteobacteria	Burkholderiales	Comamonadaceae	gi|160361034|gb|CP000884.1|	Delftia acidovorans SPH-1, complete genome	398578	4421738	4420752	988	100	0	97.06
Pcub_MSU1_v1_02145_0_0_1	1	1272	Acinetobacter oleivorans DR1	Bacteria|Proteobacteria|Gammaproteobacteria|Pseudomonadales|Moraxellaceae|Acinetobacter|Acinetobacter oleivorans|Acinetobacter oleivorans DR1	Bacteria	Proteobacteria	Gammaproteobacteria	Pseudomonadales	Moraxellaceae	gi|298698338|gb|CP002080.1|	Acinetobacter oleivorans DR1, complete genome	436717	1242100	1243371	1273	100	0	93.24
Pcub_MSU1_v1_02150_0_0_1	1	600	Acinetobacter oleivorans DR1	Bacteria|Proteobacteria|Gammaproteobacteria|Pseudomonadales|Moraxellaceae|Acinetobacter|Acinetobacter oleivorans|Acinetobacter oleivorans DR1	Bacteria	Proteobacteria	Gammaproteobacteria	Pseudomonadales	Moraxellaceae	gi|298698338|gb|CP002080.1|	Acinetobacter oleivorans DR1, complete genome	436717	1393073	1393672	600	100	0	93.83
Pcub_MSU1_v1_02155_0_2_1	1	1281	Delftia sp. Cs1-4	Bacteria|Proteobacteria|Betaproteobacteria|Burkholderiales|Comamonadaceae|Delftia|Delftia sp. Cs1-4	Bacteria	Proteobacteria	Betaproteobacteria	Burkholderiales	Comamonadaceae	gi|333741867|gb|CP002735.1|	Delftia sp. Cs1-4, complete genome	742013	6578633	6577353	1282	100	0	91.65
Pcub_MSU1_v1_02156_0_2_1	1	1023	Stenotrophomonas maltophilia JV3	Bacteria|Proteobacteria|Gammaproteobacteria|Xanthomonadales|Xanthomonadaceae|Stenotrophomonas|Stenotrophomonas maltophilia group|Stenotrophomonas maltophilia|Stenotrophomonas maltophilia JV3	Bacteria	Proteobacteria	Gammaproteobacteria	Xanthomonadales	Xanthomonadaceae	gi|343776783|gb|CP002986.1|	Stenotrophomonas maltophilia JV3, complete genome	868597	1975419	1976441	1023	100	0	91.01
Pcub_MSU1_v1_02159_0_0_1	1	2715	Acinetobacter oleivorans DR1	Bacteria|Proteobacteria|Gammaproteobacteria|Pseudomonadales|Moraxellaceae|Acinetobacter|Acinetobacter oleivorans|Acinetobacter oleivorans DR1	Bacteria	Proteobacteria	Gammaproteobacteria	Pseudomonadales	Moraxellaceae	gi|298698338|gb|CP002080.1|	Acinetobacter oleivorans DR1, complete genome	436717	924241	926955	2716	100	0	94.55
Pcub_MSU1_v1_02168_0_0_1	1	1053	Delftia acidovorans SPH-1	Bacteria|Proteobacteria|Betaproteobacteria|Burkholderiales|Comamonadaceae|Delftia|Delftia acidovorans|Delftia acidovorans SPH-1	Bacteria	Proteobacteria	Betaproteobacteria	Burkholderiales	Comamonadaceae	gi|160361034|gb|CP000884.1|	Delftia acidovorans SPH-1, complete genome	398578	3219455	3220507	1053	100	0	95.63
Pcub_MSU1_v1_02185_0_1_1	1	759	Delftia sp. Cs1-4	Bacteria|Proteobacteria|Betaproteobacteria|Burkholderiales|Comamonadaceae|Delftia|Delftia sp. Cs1-4	Bacteria	Proteobacteria	Betaproteobacteria	Burkholderiales	Comamonadaceae	gi|333741867|gb|CP002735.1|	Delftia sp. Cs1-4, complete genome	742013	3367291	3366533	759	100	0	95.26
Pcub_MSU1_v1_02192_0_0_1	1	369	Delftia sp. Cs1-4	Bacteria|Proteobacteria|Betaproteobacteria|Burkholderiales|Comamonadaceae|Delftia|Delftia sp. Cs1-4	Bacteria	Proteobacteria	Betaproteobacteria	Burkholderiales	Comamonadaceae	gi|333741867|gb|CP002735.1|	Delftia sp. Cs1-4, complete genome	742013	364652	365020	369	100	3e-159	94.58
Pcub_MSU1_v1_02192_0_3_1	1	918	Pantholops hodgsonii	Eukaryota|Opisthokonta|Metazoa|Eumetazoa|Bilateria|Deuterostomia|Chordata|Craniata|Vertebrata|Gnathostomata|Teleostomi|Euteleostomi|Sarcopterygii|Dipnotetrapodomorpha|Tetrapoda|Amniota|Mammalia|Theria|Eutheria|Boreoeutheria|Laurasiatheria|Cetartiodactyla|Ruminantia|Pecora|Bovidae|Antilopinae|Pantholops|Pantholops hodgsonii	Eukaryota	Opisthokonta	Metazoa	Eumetazoa	Bilateria	gi|556776614|ref|XM_005983345.1|	PREDICTED: Pantholops hodgsonii branched-chain-amino-acid aminotransferase-like protein 2-like (LOC102338886), mRNA	59538	1	918	918	100	0	99.02
Pcub_MSU1_v1_02194_0_3_1	1	1569	Delftia sp. Cs1-4	Bacteria|Proteobacteria|Betaproteobacteria|Burkholderiales|Comamonadaceae|Delftia|Delftia sp. Cs1-4	Bacteria	Proteobacteria	Betaproteobacteria	Burkholderiales	Comamonadaceae	gi|333741867|gb|CP002735.1|	Delftia sp. Cs1-4, complete genome	742013	101934	103531	1598	100	0	96.75
Pcub_MSU1_v1_02194_0_4_1	1	2001	Delftia sp. Cs1-4	Bacteria|Proteobacteria|Betaproteobacteria|Burkholderiales|Comamonadaceae|Delftia|Delftia sp. Cs1-4	Bacteria	Proteobacteria	Betaproteobacteria	Burkholderiales	Comamonadaceae	gi|333741867|gb|CP002735.1|	Delftia sp. Cs1-4, complete genome	742013	101075	99068	2008	100	0	98.85
Pcub_MSU1_v1_02208_0_0_1	1	774	Stenotrophomonas maltophilia D457	Bacteria|Proteobacteria|Gammaproteobacteria|Xanthomonadales|Xanthomonadaceae|Stenotrophomonas|Stenotrophomonas maltophilia group|Stenotrophomonas maltophilia|Stenotrophomonas maltophilia D457	Bacteria	Proteobacteria	Gammaproteobacteria	Xanthomonadales	Xanthomonadaceae	gi|384076029|emb|HE798556.1|	Stenotrophomonas maltophilia D457 complete genome	1163399	1575415	1574642	774	100	0	98.32
Pcub_MSU1_v1_02222_0_0_1	1	204	Acinetobacter oleivorans DR1	Bacteria|Proteobacteria|Gammaproteobacteria|Pseudomonadales|Moraxellaceae|Acinetobacter|Acinetobacter oleivorans|Acinetobacter oleivorans DR1	Bacteria	Proteobacteria	Gammaproteobacteria	Pseudomonadales	Moraxellaceae	gi|298698338|gb|CP002080.1|	Acinetobacter oleivorans DR1, complete genome	436717	3520577	3520374	204	100	3e-81	94.12
Pcub_MSU1_v1_02222_0_1_1	1	810	Acinetobacter oleivorans DR1	Bacteria|Proteobacteria|Gammaproteobacteria|Pseudomonadales|Moraxellaceae|Acinetobacter|Acinetobacter oleivorans|Acinetobacter oleivorans DR1	Bacteria	Proteobacteria	Gammaproteobacteria	Pseudomonadales	Moraxellaceae	gi|298698338|gb|CP002080.1|	Acinetobacter oleivorans DR1, complete genome	436717	3521477	3520668	810	100	0	93.7
Pcub_MSU1_v1_02228_0_0_1	1	1206	Stenotrophomonas maltophilia D457	Bacteria|Proteobacteria|Gammaproteobacteria|Xanthomonadales|Xanthomonadaceae|Stenotrophomonas|Stenotrophomonas maltophilia group|Stenotrophomonas maltophilia|Stenotrophomonas maltophilia D457	Bacteria	Proteobacteria	Gammaproteobacteria	Xanthomonadales	Xanthomonadaceae	gi|384076029|emb|HE798556.1|	Stenotrophomonas maltophilia D457 complete genome	1163399	2599823	2601028	1206	100	0	98.84
Pcub_MSU1_v1_02235_0_2_1	1	2157	Delftia sp. Cs1-4	Bacteria|Proteobacteria|Betaproteobacteria|Burkholderiales|Comamonadaceae|Delftia|Delftia sp. Cs1-4	Bacteria	Proteobacteria	Betaproteobacteria	Burkholderiales	Comamonadaceae	gi|333741867|gb|CP002735.1|	Delftia sp. Cs1-4, complete genome	742013	2338438	2340609	2172	100	0	96.18
Pcub_MSU1_v1_02236_0_3_1	1	1833	Delftia acidovorans SPH-1	Bacteria|Proteobacteria|Betaproteobacteria|Burkholderiales|Comamonadaceae|Delftia|Delftia acidovorans|Delftia acidovorans SPH-1	Bacteria	Proteobacteria	Betaproteobacteria	Burkholderiales	Comamonadaceae	gi|160361034|gb|CP000884.1|	Delftia acidovorans SPH-1, complete genome	398578	2466477	2464648	1834	100	0	98.2
Pcub_MSU1_v1_02237_0_4_1	1	1101	Delftia acidovorans SPH-1	Bacteria|Proteobacteria|Betaproteobacteria|Burkholderiales|Comamonadaceae|Delftia|Delftia acidovorans|Delftia acidovorans SPH-1	Bacteria	Proteobacteria	Betaproteobacteria	Burkholderiales	Comamonadaceae	gi|160361034|gb|CP000884.1|	Delftia acidovorans SPH-1, complete genome	398578	1123655	1122555	1101	100	0	96.46
Pcub_MSU1_v1_02245_0_0_1	1	756	Acidovorax sp. JS42	Bacteria|Proteobacteria|Betaproteobacteria|Burkholderiales|Comamonadaceae|Acidovorax|Acidovorax sp. JS42	Bacteria	Proteobacteria	Betaproteobacteria	Burkholderiales	Comamonadaceae	gi|120604516|gb|CP000539.1|	Acidovorax sp. JS42, complete genome	232721	2960719	2961474	756	100	0	91.93
Pcub_MSU1_v1_02245_0_3_1	1	702	Acidovorax avenae subsp. avenae ATCC 19860	Bacteria|Proteobacteria|Betaproteobacteria|Burkholderiales|Comamonadaceae|Acidovorax|Acidovorax avenae|Acidovorax avenae subsp. avenae|Acidovorax avenae subsp. avenae ATCC 19860	Bacteria	Proteobacteria	Betaproteobacteria	Burkholderiales	Comamonadaceae	gi|323371659|gb|CP002521.1|	Acidovorax avenae subsp. avenae ATCC 19860, complete genome	643561	3325790	3326491	702	100	0	95.44
Pcub_MSU1_v1_02245_0_4_1	1	1806	Acidovorax avenae subsp. avenae ATCC 19860	Bacteria|Proteobacteria|Betaproteobacteria|Burkholderiales|Comamonadaceae|Acidovorax|Acidovorax avenae|Acidovorax avenae subsp. avenae|Acidovorax avenae subsp. avenae ATCC 19860	Bacteria	Proteobacteria	Betaproteobacteria	Burkholderiales	Comamonadaceae	gi|323371659|gb|CP002521.1|	Acidovorax avenae subsp. avenae ATCC 19860, complete genome	643561	3323951	3325759	1813	100	0	90.9
Pcub_MSU1_v1_02248_0_0_1	1	2316	Acinetobacter oleivorans DR1	Bacteria|Proteobacteria|Gammaproteobacteria|Pseudomonadales|Moraxellaceae|Acinetobacter|Acinetobacter oleivorans|Acinetobacter oleivorans DR1	Bacteria	Proteobacteria	Gammaproteobacteria	Pseudomonadales	Moraxellaceae	gi|298698338|gb|CP002080.1|	Acinetobacter oleivorans DR1, complete genome	436717	1466824	1469139	2316	100	0	90.72
Pcub_MSU1_v1_02249_0_0_1	1	1059	Acidovorax avenae subsp. avenae ATCC 19860	Bacteria|Proteobacteria|Betaproteobacteria|Burkholderiales|Comamonadaceae|Acidovorax|Acidovorax avenae|Acidovorax avenae subsp. avenae|Acidovorax avenae subsp. avenae ATCC 19860	Bacteria	Proteobacteria	Betaproteobacteria	Burkholderiales	Comamonadaceae	gi|323371659|gb|CP002521.1|	Acidovorax avenae subsp. avenae ATCC 19860, complete genome	643561	184262	183204	1059	100	0	95.28
Pcub_MSU1_v1_02253_0_0_1	1	1029	Stenotrophomonas maltophilia D457	Bacteria|Proteobacteria|Gammaproteobacteria|Xanthomonadales|Xanthomonadaceae|Stenotrophomonas|Stenotrophomonas maltophilia group|Stenotrophomonas maltophilia|Stenotrophomonas maltophilia D457	Bacteria	Proteobacteria	Gammaproteobacteria	Xanthomonadales	Xanthomonadaceae	gi|384076029|emb|HE798556.1|	Stenotrophomonas maltophilia D457 complete genome	1163399	2193413	2192385	1029	100	0	99.81
Pcub_MSU1_v1_02257_0_0_1	1	1602	Delftia sp. Cs1-4	Bacteria|Proteobacteria|Betaproteobacteria|Burkholderiales|Comamonadaceae|Delftia|Delftia sp. Cs1-4	Bacteria	Proteobacteria	Betaproteobacteria	Burkholderiales	Comamonadaceae	gi|333741867|gb|CP002735.1|	Delftia sp. Cs1-4, complete genome	742013	5275964	5274354	1611	100	0	97.33
Pcub_MSU1_v1_02262_0_0_1	1	2430	Acinetobacter oleivorans DR1	Bacteria|Proteobacteria|Gammaproteobacteria|Pseudomonadales|Moraxellaceae|Acinetobacter|Acinetobacter oleivorans|Acinetobacter oleivorans DR1	Bacteria	Proteobacteria	Gammaproteobacteria	Pseudomonadales	Moraxellaceae	gi|298698338|gb|CP002080.1|	Acinetobacter oleivorans DR1, complete genome	436717	3030201	3032630	2430	100	0	96.67
Pcub_MSU1_v1_02265_0_0_1	1	1989	Delftia sp. Cs1-4	Bacteria|Proteobacteria|Betaproteobacteria|Burkholderiales|Comamonadaceae|Delftia|Delftia sp. Cs1-4	Bacteria	Proteobacteria	Betaproteobacteria	Burkholderiales	Comamonadaceae	gi|333741867|gb|CP002735.1|	Delftia sp. Cs1-4, complete genome	742013	5740021	5738033	1989	100	0	97.79
Pcub_MSU1_v1_02265_0_1_1	1	1005	Delftia sp. Cs1-4	Bacteria|Proteobacteria|Betaproteobacteria|Burkholderiales|Comamonadaceae|Delftia|Delftia sp. Cs1-4	Bacteria	Proteobacteria	Betaproteobacteria	Burkholderiales	Comamonadaceae	gi|333741867|gb|CP002735.1|	Delftia sp. Cs1-4, complete genome	742013	5740347	5741351	1005	100	0	97.51
Pcub_MSU1_v1_02265_0_2_1	1	717	Delftia sp. Cs1-4	Bacteria|Proteobacteria|Betaproteobacteria|Burkholderiales|Comamonadaceae|Delftia|Delftia sp. Cs1-4	Bacteria	Proteobacteria	Betaproteobacteria	Burkholderiales	Comamonadaceae	gi|333741867|gb|CP002735.1|	Delftia sp. Cs1-4, complete genome	742013	5735972	5736688	717	100	0	97.63
Pcub_MSU1_v1_02266_0_0_1	1	1416	Acinetobacter oleivorans DR1	Bacteria|Proteobacteria|Gammaproteobacteria|Pseudomonadales|Moraxellaceae|Acinetobacter|Acinetobacter oleivorans|Acinetobacter oleivorans DR1	Bacteria	Proteobacteria	Gammaproteobacteria	Pseudomonadales	Moraxellaceae	gi|298698338|gb|CP002080.1|	Acinetobacter oleivorans DR1, complete genome	436717	1456861	1455446	1416	100	0	94.7
Pcub_MSU1_v1_02266_0_1_1	1	1437	Acinetobacter oleivorans DR1	Bacteria|Proteobacteria|Gammaproteobacteria|Pseudomonadales|Moraxellaceae|Acinetobacter|Acinetobacter oleivorans|Acinetobacter oleivorans DR1	Bacteria	Proteobacteria	Gammaproteobacteria	Pseudomonadales	Moraxellaceae	gi|298698338|gb|CP002080.1|	Acinetobacter oleivorans DR1, complete genome	436717	1455227	1453791	1437	100	0	91.86
Pcub_MSU1_v1_02276_0_0_1	1	1251	Stenotrophomonas maltophilia D457	Bacteria|Proteobacteria|Gammaproteobacteria|Xanthomonadales|Xanthomonadaceae|Stenotrophomonas|Stenotrophomonas maltophilia group|Stenotrophomonas maltophilia|Stenotrophomonas maltophilia D457	Bacteria	Proteobacteria	Gammaproteobacteria	Xanthomonadales	Xanthomonadaceae	gi|384076029|emb|HE798556.1|	Stenotrophomonas maltophilia D457 complete genome	1163399	4601758	4600508	1251	100	0	99.44
Pcub_MSU1_v1_02277_0_0_1	1	996	Stenotrophomonas maltophilia D457	Bacteria|Proteobacteria|Gammaproteobacteria|Xanthomonadales|Xanthomonadaceae|Stenotrophomonas|Stenotrophomonas maltophilia group|Stenotrophomonas maltophilia|Stenotrophomonas maltophilia D457	Bacteria	Proteobacteria	Gammaproteobacteria	Xanthomonadales	Xanthomonadaceae	gi|384076029|emb|HE798556.1|	Stenotrophomonas maltophilia D457 complete genome	1163399	1453132	1452137	996	100	0	99.9
Pcub_MSU1_v1_02282_0_4_1	1	714	Pantholops hodgsonii	Eukaryota|Opisthokonta|Metazoa|Eumetazoa|Bilateria|Deuterostomia|Chordata|Craniata|Vertebrata|Gnathostomata|Teleostomi|Euteleostomi|Sarcopterygii|Dipnotetrapodomorpha|Tetrapoda|Amniota|Mammalia|Theria|Eutheria|Boreoeutheria|Laurasiatheria|Cetartiodactyla|Ruminantia|Pecora|Bovidae|Antilopinae|Pantholops|Pantholops hodgsonii	Eukaryota	Opisthokonta	Metazoa	Eumetazoa	Bilateria	gi|556769067|ref|XM_005979682.1|	PREDICTED: Pantholops hodgsonii uncharacterized LOC102336773 (LOC102336773), mRNA	59538	754	1467	714	100	0	99.3
Pcub_MSU1_v1_02285_0_0_1	1	498	Pantholops hodgsonii	Eukaryota|Opisthokonta|Metazoa|Eumetazoa|Bilateria|Deuterostomia|Chordata|Craniata|Vertebrata|Gnathostomata|Teleostomi|Euteleostomi|Sarcopterygii|Dipnotetrapodomorpha|Tetrapoda|Amniota|Mammalia|Theria|Eutheria|Boreoeutheria|Laurasiatheria|Cetartiodactyla|Ruminantia|Pecora|Bovidae|Antilopinae|Pantholops|Pantholops hodgsonii	Eukaryota	Opisthokonta	Metazoa	Eumetazoa	Bilateria	gi|556750082|ref|XM_005970398.1|	PREDICTED: Pantholops hodgsonii probable alanine--tRNA ligase, chloroplastic-like (LOC102342602), mRNA	59538	1	498	498	100	0	99.6
Pcub_MSU1_v1_02290_0_0_1	1	453	Delftia sp. Cs1-4	Bacteria|Proteobacteria|Betaproteobacteria|Burkholderiales|Comamonadaceae|Delftia|Delftia sp. Cs1-4	Bacteria	Proteobacteria	Betaproteobacteria	Burkholderiales	Comamonadaceae	gi|333741867|gb|CP002735.1|	Delftia sp. Cs1-4, complete genome	742013	5337682	5337230	453	100	0	97.79
Pcub_MSU1_v1_02299_0_0_1	1	1284	Stenotrophomonas maltophilia	Bacteria|Proteobacteria|Gammaproteobacteria|Xanthomonadales|Xanthomonadaceae|Stenotrophomonas|Stenotrophomonas maltophilia group|Stenotrophomonas maltophilia	Bacteria	Proteobacteria	Gammaproteobacteria	Xanthomonadales	Xanthomonadaceae	gi|922795094|gb|CP011305.1|	Stenotrophomonas maltophilia strain ISMMS2, complete genome	40324	43383	44666	1284	100	0	93.3
Pcub_MSU1_v1_02306_0_0_1	1	1182	Acinetobacter oleivorans DR1	Bacteria|Proteobacteria|Gammaproteobacteria|Pseudomonadales|Moraxellaceae|Acinetobacter|Acinetobacter oleivorans|Acinetobacter oleivorans DR1	Bacteria	Proteobacteria	Gammaproteobacteria	Pseudomonadales	Moraxellaceae	gi|298698338|gb|CP002080.1|	Acinetobacter oleivorans DR1, complete genome	436717	3067449	3068630	1182	100	0	94.16
Pcub_MSU1_v1_02306_0_2_1	1	945	Acinetobacter oleivorans DR1	Bacteria|Proteobacteria|Gammaproteobacteria|Pseudomonadales|Moraxellaceae|Acinetobacter|Acinetobacter oleivorans|Acinetobacter oleivorans DR1	Bacteria	Proteobacteria	Gammaproteobacteria	Pseudomonadales	Moraxellaceae	gi|298698338|gb|CP002080.1|	Acinetobacter oleivorans DR1, complete genome	436717	3068684	3069628	945	100	0	95.66
Pcub_MSU1_v1_02307_0_1_1	1	2316	Acidovorax avenae subsp. avenae ATCC 19860	Bacteria|Proteobacteria|Betaproteobacteria|Burkholderiales|Comamonadaceae|Acidovorax|Acidovorax avenae|Acidovorax avenae subsp. avenae|Acidovorax avenae subsp. avenae ATCC 19860	Bacteria	Proteobacteria	Betaproteobacteria	Burkholderiales	Comamonadaceae	gi|323371659|gb|CP002521.1|	Acidovorax avenae subsp. avenae ATCC 19860, complete genome	643561	2244292	2246607	2319	100	0	90.34
Pcub_MSU1_v1_02312_0_1_1	1	1440	Delftia sp. Cs1-4	Bacteria|Proteobacteria|Betaproteobacteria|Burkholderiales|Comamonadaceae|Delftia|Delftia sp. Cs1-4	Bacteria	Proteobacteria	Betaproteobacteria	Burkholderiales	Comamonadaceae	gi|333741867|gb|CP002735.1|	Delftia sp. Cs1-4, complete genome	742013	6508666	6507227	1440	100	0	98.89
Pcub_MSU1_v1_02312_0_2_1	1	981	Delftia sp. Cs1-4	Bacteria|Proteobacteria|Betaproteobacteria|Burkholderiales|Comamonadaceae|Delftia|Delftia sp. Cs1-4	Bacteria	Proteobacteria	Betaproteobacteria	Burkholderiales	Comamonadaceae	gi|333741867|gb|CP002735.1|	Delftia sp. Cs1-4, complete genome	742013	6509925	6510905	981	100	0	98.98
Pcub_MSU1_v1_02316_0_0_1	1	1218	Delftia sp. Cs1-4	Bacteria|Proteobacteria|Betaproteobacteria|Burkholderiales|Comamonadaceae|Delftia|Delftia sp. Cs1-4	Bacteria	Proteobacteria	Betaproteobacteria	Burkholderiales	Comamonadaceae	gi|333741867|gb|CP002735.1|	Delftia sp. Cs1-4, complete genome	742013	6274919	6273702	1218	100	0	96.63
Pcub_MSU1_v1_02318_0_1_1	1	924	Pantholops hodgsonii	Eukaryota|Opisthokonta|Metazoa|Eumetazoa|Bilateria|Deuterostomia|Chordata|Craniata|Vertebrata|Gnathostomata|Teleostomi|Euteleostomi|Sarcopterygii|Dipnotetrapodomorpha|Tetrapoda|Amniota|Mammalia|Theria|Eutheria|Boreoeutheria|Laurasiatheria|Cetartiodactyla|Ruminantia|Pecora|Bovidae|Antilopinae|Pantholops|Pantholops hodgsonii	Eukaryota	Opisthokonta	Metazoa	Eumetazoa	Bilateria	gi|556759800|ref|XM_005975162.1|	PREDICTED: Pantholops hodgsonii cysteine synthase-like (LOC102322110), mRNA	59538	1	924	924	100	0	99.35
Pcub_MSU1_v1_02326_0_1_1	1	2574	Stenotrophomonas maltophilia D457	Bacteria|Proteobacteria|Gammaproteobacteria|Xanthomonadales|Xanthomonadaceae|Stenotrophomonas|Stenotrophomonas maltophilia group|Stenotrophomonas maltophilia|Stenotrophomonas maltophilia D457	Bacteria	Proteobacteria	Gammaproteobacteria	Xanthomonadales	Xanthomonadaceae	gi|384076029|emb|HE798556.1|	Stenotrophomonas maltophilia D457 complete genome	1163399	2800233	2802823	2591	100	0	98.65
Pcub_MSU1_v1_02328_0_0_1	1	672	Delftia sp. Cs1-4	Bacteria|Proteobacteria|Betaproteobacteria|Burkholderiales|Comamonadaceae|Delftia|Delftia sp. Cs1-4	Bacteria	Proteobacteria	Betaproteobacteria	Burkholderiales	Comamonadaceae	gi|333741867|gb|CP002735.1|	Delftia sp. Cs1-4, complete genome	742013	5935678	5935007	672	100	0	98.66
Pcub_MSU1_v1_02329_0_0_1	1	2424	Stenotrophomonas maltophilia D457	Bacteria|Proteobacteria|Gammaproteobacteria|Xanthomonadales|Xanthomonadaceae|Stenotrophomonas|Stenotrophomonas maltophilia group|Stenotrophomonas maltophilia|Stenotrophomonas maltophilia D457	Bacteria	Proteobacteria	Gammaproteobacteria	Xanthomonadales	Xanthomonadaceae	gi|384076029|emb|HE798556.1|	Stenotrophomonas maltophilia D457 complete genome	1163399	3824253	3826676	2424	100	0	98.14
Pcub_MSU1_v1_02332_0_1_1	1	1029	Acidovorax avenae subsp. avenae ATCC 19860	Bacteria|Proteobacteria|Betaproteobacteria|Burkholderiales|Comamonadaceae|Acidovorax|Acidovorax avenae|Acidovorax avenae subsp. avenae|Acidovorax avenae subsp. avenae ATCC 19860	Bacteria	Proteobacteria	Betaproteobacteria	Burkholderiales	Comamonadaceae	gi|323371659|gb|CP002521.1|	Acidovorax avenae subsp. avenae ATCC 19860, complete genome	643561	939014	937986	1029	100	0	90.28
Pcub_MSU1_v1_02333_0_0_1	1	1356	Pseudomonas putida S12	Bacteria|Proteobacteria|Gammaproteobacteria|Pseudomonadales|Pseudomonadaceae|Pseudomonas|Pseudomonas putida group|Pseudomonas putida|Pseudomonas putida S12	Bacteria	Proteobacteria	Gammaproteobacteria	Pseudomonadales	Pseudomonadaceae	gi|734574563|gb|CP009974.1|	Pseudomonas putida S12, complete genome	1215087	1946993	1945638	1356	100	0	99.93
Pcub_MSU1_v1_02335_0_1_1	1	1242	Acinetobacter baumannii	Bacteria|Proteobacteria|Gammaproteobacteria|Pseudomonadales|Moraxellaceae|Acinetobacter|Acinetobacter calcoaceticus/baumannii complex|Acinetobacter baumannii	Bacteria	Proteobacteria	Gammaproteobacteria	Pseudomonadales	Moraxellaceae	gi|742926533|gb|CP010368.1|	Acinetobacter baumannii strain 6411, complete genome	470	1786364	1787605	1242	100	0	90.82
Pcub_MSU1_v1_02336_0_1_1	1	1215	Stenotrophomonas maltophilia D457	Bacteria|Proteobacteria|Gammaproteobacteria|Xanthomonadales|Xanthomonadaceae|Stenotrophomonas|Stenotrophomonas maltophilia group|Stenotrophomonas maltophilia|Stenotrophomonas maltophilia D457	Bacteria	Proteobacteria	Gammaproteobacteria	Xanthomonadales	Xanthomonadaceae	gi|384076029|emb|HE798556.1|	Stenotrophomonas maltophilia D457 complete genome	1163399	1403268	1404467	1215	100	0	98.19
Pcub_MSU1_v1_02336_0_2_1	1	2064	Stenotrophomonas maltophilia D457	Bacteria|Proteobacteria|Gammaproteobacteria|Xanthomonadales|Xanthomonadaceae|Stenotrophomonas|Stenotrophomonas maltophilia group|Stenotrophomonas maltophilia|Stenotrophomonas maltophilia D457	Bacteria	Proteobacteria	Gammaproteobacteria	Xanthomonadales	Xanthomonadaceae	gi|384076029|emb|HE798556.1|	Stenotrophomonas maltophilia D457 complete genome	1163399	1406154	1408217	2064	100	0	98.35
Pcub_MSU1_v1_02348_0_0_1	1	2052	Stenotrophomonas maltophilia JV3	Bacteria|Proteobacteria|Gammaproteobacteria|Xanthomonadales|Xanthomonadaceae|Stenotrophomonas|Stenotrophomonas maltophilia group|Stenotrophomonas maltophilia|Stenotrophomonas maltophilia JV3	Bacteria	Proteobacteria	Gammaproteobacteria	Xanthomonadales	Xanthomonadaceae	gi|343776783|gb|CP002986.1|	Stenotrophomonas maltophilia JV3, complete genome	868597	933201	931150	2052	100	0	97.27
Pcub_MSU1_v1_02348_0_3_1	1	1197	Stenotrophomonas maltophilia D457	Bacteria|Proteobacteria|Gammaproteobacteria|Xanthomonadales|Xanthomonadaceae|Stenotrophomonas|Stenotrophomonas maltophilia group|Stenotrophomonas maltophilia|Stenotrophomonas maltophilia D457	Bacteria	Proteobacteria	Gammaproteobacteria	Xanthomonadales	Xanthomonadaceae	gi|384076029|emb|HE798556.1|	Stenotrophomonas maltophilia D457 complete genome	1163399	959356	958160	1197	100	0	97.83
Pcub_MSU1_v1_02349_0_0_1	1	1788	Delftia sp. Cs1-4	Bacteria|Proteobacteria|Betaproteobacteria|Burkholderiales|Comamonadaceae|Delftia|Delftia sp. Cs1-4	Bacteria	Proteobacteria	Betaproteobacteria	Burkholderiales	Comamonadaceae	gi|333741867|gb|CP002735.1|	Delftia sp. Cs1-4, complete genome	742013	6092025	6090247	1788	100	0	99.11
Pcub_MSU1_v1_02354_0_3_1	1	2493	Stenotrophomonas maltophilia D457	Bacteria|Proteobacteria|Gammaproteobacteria|Xanthomonadales|Xanthomonadaceae|Stenotrophomonas|Stenotrophomonas maltophilia group|Stenotrophomonas maltophilia|Stenotrophomonas maltophilia D457	Bacteria	Proteobacteria	Gammaproteobacteria	Xanthomonadales	Xanthomonadaceae	gi|384076029|emb|HE798556.1|	Stenotrophomonas maltophilia D457 complete genome	1163399	2139951	2142455	2505	100	0	97.29
Pcub_MSU1_v1_02355_0_2_1	1	1122	Acinetobacter oleivorans DR1	Bacteria|Proteobacteria|Gammaproteobacteria|Pseudomonadales|Moraxellaceae|Acinetobacter|Acinetobacter oleivorans|Acinetobacter oleivorans DR1	Bacteria	Proteobacteria	Gammaproteobacteria	Pseudomonadales	Moraxellaceae	gi|298698338|gb|CP002080.1|	Acinetobacter oleivorans DR1, complete genome	436717	2326831	2325710	1123	100	0	94.3
Pcub_MSU1_v1_02361_0_3_1	1	372	Stenotrophomonas maltophilia D457	Bacteria|Proteobacteria|Gammaproteobacteria|Xanthomonadales|Xanthomonadaceae|Stenotrophomonas|Stenotrophomonas maltophilia group|Stenotrophomonas maltophilia|Stenotrophomonas maltophilia D457	Bacteria	Proteobacteria	Gammaproteobacteria	Xanthomonadales	Xanthomonadaceae	gi|384076029|emb|HE798556.1|	Stenotrophomonas maltophilia D457 complete genome	1163399	3801134	3801505	372	100	0	98.39
Pcub_MSU1_v1_02361_0_4_1	1	801	Stenotrophomonas maltophilia D457	Bacteria|Proteobacteria|Gammaproteobacteria|Xanthomonadales|Xanthomonadaceae|Stenotrophomonas|Stenotrophomonas maltophilia group|Stenotrophomonas maltophilia|Stenotrophomonas maltophilia D457	Bacteria	Proteobacteria	Gammaproteobacteria	Xanthomonadales	Xanthomonadaceae	gi|384076029|emb|HE798556.1|	Stenotrophomonas maltophilia D457 complete genome	1163399	3801517	3802317	801	100	0	98.88
Pcub_MSU1_v1_02371_0_0_1	1	1074	Delftia sp. Cs1-4	Bacteria|Proteobacteria|Betaproteobacteria|Burkholderiales|Comamonadaceae|Delftia|Delftia sp. Cs1-4	Bacteria	Proteobacteria	Betaproteobacteria	Burkholderiales	Comamonadaceae	gi|333741867|gb|CP002735.1|	Delftia sp. Cs1-4, complete genome	742013	729217	728144	1074	100	0	98.14
Pcub_MSU1_v1_02371_0_1_1	1	1287	Delftia sp. Cs1-4	Bacteria|Proteobacteria|Betaproteobacteria|Burkholderiales|Comamonadaceae|Delftia|Delftia sp. Cs1-4	Bacteria	Proteobacteria	Betaproteobacteria	Burkholderiales	Comamonadaceae	gi|333741867|gb|CP002735.1|	Delftia sp. Cs1-4, complete genome	742013	731687	730401	1287	100	0	99.15
Pcub_MSU1_v1_02371_0_2_1	1	906	Delftia acidovorans SPH-1	Bacteria|Proteobacteria|Betaproteobacteria|Burkholderiales|Comamonadaceae|Delftia|Delftia acidovorans|Delftia acidovorans SPH-1	Bacteria	Proteobacteria	Betaproteobacteria	Burkholderiales	Comamonadaceae	gi|160361034|gb|CP000884.1|	Delftia acidovorans SPH-1, complete genome	398578	6624222	6625127	907	100	0	98.79
Pcub_MSU1_v1_02387_0_1_1	1	765	Delftia sp. Cs1-4	Bacteria|Proteobacteria|Betaproteobacteria|Burkholderiales|Comamonadaceae|Delftia|Delftia sp. Cs1-4	Bacteria	Proteobacteria	Betaproteobacteria	Burkholderiales	Comamonadaceae	gi|333741867|gb|CP002735.1|	Delftia sp. Cs1-4, complete genome	742013	637680	638444	765	100	0	95.42
Pcub_MSU1_v1_02389_0_1_1	1	942	Delftia acidovorans SPH-1	Bacteria|Proteobacteria|Betaproteobacteria|Burkholderiales|Comamonadaceae|Delftia|Delftia acidovorans|Delftia acidovorans SPH-1	Bacteria	Proteobacteria	Betaproteobacteria	Burkholderiales	Comamonadaceae	gi|160361034|gb|CP000884.1|	Delftia acidovorans SPH-1, complete genome	398578	3270528	3269587	942	100	0	96.5
Pcub_MSU1_v1_02400_0_0_1	1	1377	Stenotrophomonas maltophilia D457	Bacteria|Proteobacteria|Gammaproteobacteria|Xanthomonadales|Xanthomonadaceae|Stenotrophomonas|Stenotrophomonas maltophilia group|Stenotrophomonas maltophilia|Stenotrophomonas maltophilia D457	Bacteria	Proteobacteria	Gammaproteobacteria	Xanthomonadales	Xanthomonadaceae	gi|384076029|emb|HE798556.1|	Stenotrophomonas maltophilia D457 complete genome	1163399	4675684	4674308	1377	100	0	99.85
Pcub_MSU1_v1_02406_0_1_1	1	1104	Delftia acidovorans SPH-1	Bacteria|Proteobacteria|Betaproteobacteria|Burkholderiales|Comamonadaceae|Delftia|Delftia acidovorans|Delftia acidovorans SPH-1	Bacteria	Proteobacteria	Betaproteobacteria	Burkholderiales	Comamonadaceae	gi|160361034|gb|CP000884.1|	Delftia acidovorans SPH-1, complete genome	398578	351750	352853	1104	100	0	94.93
Pcub_MSU1_v1_02406_0_2_1	1	681	Delftia acidovorans SPH-1	Bacteria|Proteobacteria|Betaproteobacteria|Burkholderiales|Comamonadaceae|Delftia|Delftia acidovorans|Delftia acidovorans SPH-1	Bacteria	Proteobacteria	Betaproteobacteria	Burkholderiales	Comamonadaceae	gi|160361034|gb|CP000884.1|	Delftia acidovorans SPH-1, complete genome	398578	347700	348380	681	100	0	93.98
Pcub_MSU1_v1_02417_0_0_1	1	663	Acinetobacter oleivorans DR1	Bacteria|Proteobacteria|Gammaproteobacteria|Pseudomonadales|Moraxellaceae|Acinetobacter|Acinetobacter oleivorans|Acinetobacter oleivorans DR1	Bacteria	Proteobacteria	Gammaproteobacteria	Pseudomonadales	Moraxellaceae	gi|298698338|gb|CP002080.1|	Acinetobacter oleivorans DR1, complete genome	436717	3039702	3039040	663	100	0	96.38
Pcub_MSU1_v1_02422_0_0_1	1	468	Acinetobacter oleivorans DR1	Bacteria|Proteobacteria|Gammaproteobacteria|Pseudomonadales|Moraxellaceae|Acinetobacter|Acinetobacter oleivorans|Acinetobacter oleivorans DR1	Bacteria	Proteobacteria	Gammaproteobacteria	Pseudomonadales	Moraxellaceae	gi|298698338|gb|CP002080.1|	Acinetobacter oleivorans DR1, complete genome	436717	4084877	4085344	468	100	0	91.45
Pcub_MSU1_v1_02422_0_3_1	1	423	Acinetobacter calcoaceticus PHEA-2	Bacteria|Proteobacteria|Gammaproteobacteria|Pseudomonadales|Moraxellaceae|Acinetobacter|Acinetobacter calcoaceticus/baumannii complex|Acinetobacter calcoaceticus|Acinetobacter calcoaceticus PHEA-2	Bacteria	Proteobacteria	Gammaproteobacteria	Pseudomonadales	Moraxellaceae	gi|325121063|gb|CP002177.1|	Acinetobacter calcoaceticus PHEA-2, complete genome	871585	3181097	3180675	423	100	3e-159	91.02
Pcub_MSU1_v1_02423_0_2_1	1	1413	Delftia sp. Cs1-4	Bacteria|Proteobacteria|Betaproteobacteria|Burkholderiales|Comamonadaceae|Delftia|Delftia sp. Cs1-4	Bacteria	Proteobacteria	Betaproteobacteria	Burkholderiales	Comamonadaceae	gi|333741867|gb|CP002735.1|	Delftia sp. Cs1-4, complete genome	742013	1465715	1464303	1414	100	0	96.18
Pcub_MSU1_v1_02430_0_1_1	1	786	Delftia acidovorans SPH-1	Bacteria|Proteobacteria|Betaproteobacteria|Burkholderiales|Comamonadaceae|Delftia|Delftia acidovorans|Delftia acidovorans SPH-1	Bacteria	Proteobacteria	Betaproteobacteria	Burkholderiales	Comamonadaceae	gi|160361034|gb|CP000884.1|	Delftia acidovorans SPH-1, complete genome	398578	2681756	2680971	786	100	0	99.49
Pcub_MSU1_v1_02442_0_1_1	1	1458	Delftia acidovorans SPH-1	Bacteria|Proteobacteria|Betaproteobacteria|Burkholderiales|Comamonadaceae|Delftia|Delftia acidovorans|Delftia acidovorans SPH-1	Bacteria	Proteobacteria	Betaproteobacteria	Burkholderiales	Comamonadaceae	gi|160361034|gb|CP000884.1|	Delftia acidovorans SPH-1, complete genome	398578	113823	112366	1458	100	0	99.04
Pcub_MSU1_v1_02457_0_0_1	1	1389	Acinetobacter baumannii	Bacteria|Proteobacteria|Gammaproteobacteria|Pseudomonadales|Moraxellaceae|Acinetobacter|Acinetobacter calcoaceticus/baumannii complex|Acinetobacter baumannii	Bacteria	Proteobacteria	Gammaproteobacteria	Pseudomonadales	Moraxellaceae	gi|692328596|gb|CP009534.1|	Acinetobacter baumannii strain AbH12O-A2, complete genome	470	2083253	2084645	1394	100	0	93.11
Pcub_MSU1_v1_02457_0_1_1	1	1488	Acinetobacter baumannii	Bacteria|Proteobacteria|Gammaproteobacteria|Pseudomonadales|Moraxellaceae|Acinetobacter|Acinetobacter calcoaceticus/baumannii complex|Acinetobacter baumannii	Bacteria	Proteobacteria	Gammaproteobacteria	Pseudomonadales	Moraxellaceae	gi|742926533|gb|CP010368.1|	Acinetobacter baumannii strain 6411, complete genome	470	1808104	1809591	1489	100	0	91.13
Pcub_MSU1_v1_02457_0_2_1	1	708	Acinetobacter baumannii	Bacteria|Proteobacteria|Gammaproteobacteria|Pseudomonadales|Moraxellaceae|Acinetobacter|Acinetobacter calcoaceticus/baumannii complex|Acinetobacter baumannii	Bacteria	Proteobacteria	Gammaproteobacteria	Pseudomonadales	Moraxellaceae	gi|787858845|gb|CP008706.1|	Acinetobacter baumannii strain AB5075-UW, complete genome	470	1864634	1865341	708	100	0	94.07
Pcub_MSU1_v1_02465_0_1_1	1	1548	Delftia sp. Cs1-4	Bacteria|Proteobacteria|Betaproteobacteria|Burkholderiales|Comamonadaceae|Delftia|Delftia sp. Cs1-4	Bacteria	Proteobacteria	Betaproteobacteria	Burkholderiales	Comamonadaceae	gi|333741867|gb|CP002735.1|	Delftia sp. Cs1-4, complete genome	742013	5540119	5541666	1548	100	0	96.25
Pcub_MSU1_v1_02465_0_4_1	1	1032	Delftia acidovorans SPH-1	Bacteria|Proteobacteria|Betaproteobacteria|Burkholderiales|Comamonadaceae|Delftia|Delftia acidovorans|Delftia acidovorans SPH-1	Bacteria	Proteobacteria	Betaproteobacteria	Burkholderiales	Comamonadaceae	gi|160361034|gb|CP000884.1|	Delftia acidovorans SPH-1, complete genome	398578	1796305	1797336	1032	100	0	94.77
Pcub_MSU1_v1_02477_0_0_1	1	882	Stenotrophomonas maltophilia D457	Bacteria|Proteobacteria|Gammaproteobacteria|Xanthomonadales|Xanthomonadaceae|Stenotrophomonas|Stenotrophomonas maltophilia group|Stenotrophomonas maltophilia|Stenotrophomonas maltophilia D457	Bacteria	Proteobacteria	Gammaproteobacteria	Xanthomonadales	Xanthomonadaceae	gi|384076029|emb|HE798556.1|	Stenotrophomonas maltophilia D457 complete genome	1163399	1592670	1591789	882	100	0	98.53
Pcub_MSU1_v1_02480_0_2_1	1	1137	Delftia acidovorans SPH-1	Bacteria|Proteobacteria|Betaproteobacteria|Burkholderiales|Comamonadaceae|Delftia|Delftia acidovorans|Delftia acidovorans SPH-1	Bacteria	Proteobacteria	Betaproteobacteria	Burkholderiales	Comamonadaceae	gi|160361034|gb|CP000884.1|	Delftia acidovorans SPH-1, complete genome	398578	6344169	6343033	1137	100	0	96.57
Pcub_MSU1_v1_02484_0_1_1	1	1233	Delftia sp. Cs1-4	Bacteria|Proteobacteria|Betaproteobacteria|Burkholderiales|Comamonadaceae|Delftia|Delftia sp. Cs1-4	Bacteria	Proteobacteria	Betaproteobacteria	Burkholderiales	Comamonadaceae	gi|333741867|gb|CP002735.1|	Delftia sp. Cs1-4, complete genome	742013	1447514	1446282	1233	100	0	93.51
Pcub_MSU1_v1_02484_0_3_1	1	1431	Delftia sp. Cs1-4	Bacteria|Proteobacteria|Betaproteobacteria|Burkholderiales|Comamonadaceae|Delftia|Delftia sp. Cs1-4	Bacteria	Proteobacteria	Betaproteobacteria	Burkholderiales	Comamonadaceae	gi|333741867|gb|CP002735.1|	Delftia sp. Cs1-4, complete genome	742013	1444829	1446259	1432	100	0	92.32
Pcub_MSU1_v1_02490_0_2_1	1	1407	Stenotrophomonas maltophilia D457	Bacteria|Proteobacteria|Gammaproteobacteria|Xanthomonadales|Xanthomonadaceae|Stenotrophomonas|Stenotrophomonas maltophilia group|Stenotrophomonas maltophilia|Stenotrophomonas maltophilia D457	Bacteria	Proteobacteria	Gammaproteobacteria	Xanthomonadales	Xanthomonadaceae	gi|384076029|emb|HE798556.1|	Stenotrophomonas maltophilia D457 complete genome	1163399	4517608	4516202	1407	100	0	94.6
Pcub_MSU1_v1_02499_0_1_1	1	1269	Stenotrophomonas maltophilia D457	Bacteria|Proteobacteria|Gammaproteobacteria|Xanthomonadales|Xanthomonadaceae|Stenotrophomonas|Stenotrophomonas maltophilia group|Stenotrophomonas maltophilia|Stenotrophomonas maltophilia D457	Bacteria	Proteobacteria	Gammaproteobacteria	Xanthomonadales	Xanthomonadaceae	gi|384076029|emb|HE798556.1|	Stenotrophomonas maltophilia D457 complete genome	1163399	3460100	3458832	1273	100	0	92.85
Pcub_MSU1_v1_02506_0_3_1	1	2835	Stenotrophomonas maltophilia D457	Bacteria|Proteobacteria|Gammaproteobacteria|Xanthomonadales|Xanthomonadaceae|Stenotrophomonas|Stenotrophomonas maltophilia group|Stenotrophomonas maltophilia|Stenotrophomonas maltophilia D457	Bacteria	Proteobacteria	Gammaproteobacteria	Xanthomonadales	Xanthomonadaceae	gi|384076029|emb|HE798556.1|	Stenotrophomonas maltophilia D457 complete genome	1163399	3450847	3453689	2843	100	0	92.75
Pcub_MSU1_v1_02506_0_5_1	1	411	Stenotrophomonas maltophilia D457	Bacteria|Proteobacteria|Gammaproteobacteria|Xanthomonadales|Xanthomonadaceae|Stenotrophomonas|Stenotrophomonas maltophilia group|Stenotrophomonas maltophilia|Stenotrophomonas maltophilia D457	Bacteria	Proteobacteria	Gammaproteobacteria	Xanthomonadales	Xanthomonadaceae	gi|384076029|emb|HE798556.1|	Stenotrophomonas maltophilia D457 complete genome	1163399	3450417	3450827	411	100	0	100
Pcub_MSU1_v1_02506_0_9_1	1	1530	Stenotrophomonas maltophilia D457	Bacteria|Proteobacteria|Gammaproteobacteria|Xanthomonadales|Xanthomonadaceae|Stenotrophomonas|Stenotrophomonas maltophilia group|Stenotrophomonas maltophilia|Stenotrophomonas maltophilia D457	Bacteria	Proteobacteria	Gammaproteobacteria	Xanthomonadales	Xanthomonadaceae	gi|384076029|emb|HE798556.1|	Stenotrophomonas maltophilia D457 complete genome	1163399	3452469	3450940	1530	100	0	96.34
Pcub_MSU1_v1_02507_0_3_1	1	1821	Delftia sp. Cs1-4	Bacteria|Proteobacteria|Betaproteobacteria|Burkholderiales|Comamonadaceae|Delftia|Delftia sp. Cs1-4	Bacteria	Proteobacteria	Betaproteobacteria	Burkholderiales	Comamonadaceae	gi|333741867|gb|CP002735.1|	Delftia sp. Cs1-4, complete genome	742013	3784610	3782790	1821	100	0	92.04
Pcub_MSU1_v1_02509_0_0_1	1	735	Stenotrophomonas maltophilia D457	Bacteria|Proteobacteria|Gammaproteobacteria|Xanthomonadales|Xanthomonadaceae|Stenotrophomonas|Stenotrophomonas maltophilia group|Stenotrophomonas maltophilia|Stenotrophomonas maltophilia D457	Bacteria	Proteobacteria	Gammaproteobacteria	Xanthomonadales	Xanthomonadaceae	gi|384076029|emb|HE798556.1|	Stenotrophomonas maltophilia D457 complete genome	1163399	3004985	3004251	735	100	0	99.73
Pcub_MSU1_v1_02510_0_0_1	1	1317	Delftia sp. Cs1-4	Bacteria|Proteobacteria|Betaproteobacteria|Burkholderiales|Comamonadaceae|Delftia|Delftia sp. Cs1-4	Bacteria	Proteobacteria	Betaproteobacteria	Burkholderiales	Comamonadaceae	gi|333741867|gb|CP002735.1|	Delftia sp. Cs1-4, complete genome	742013	5558161	5556845	1317	100	0	98.86
Pcub_MSU1_v1_02510_0_1_1	1	1539	Delftia acidovorans SPH-1	Bacteria|Proteobacteria|Betaproteobacteria|Burkholderiales|Comamonadaceae|Delftia|Delftia acidovorans|Delftia acidovorans SPH-1	Bacteria	Proteobacteria	Betaproteobacteria	Burkholderiales	Comamonadaceae	gi|160361034|gb|CP000884.1|	Delftia acidovorans SPH-1, complete genome	398578	1790104	1791651	1548	100	0	96.51
Pcub_MSU1_v1_02514_0_0_1	1	1113	Acinetobacter oleivorans DR1	Bacteria|Proteobacteria|Gammaproteobacteria|Pseudomonadales|Moraxellaceae|Acinetobacter|Acinetobacter oleivorans|Acinetobacter oleivorans DR1	Bacteria	Proteobacteria	Gammaproteobacteria	Pseudomonadales	Moraxellaceae	gi|298698338|gb|CP002080.1|	Acinetobacter oleivorans DR1, complete genome	436717	1504266	1505378	1113	100	0	93.08
Pcub_MSU1_v1_02514_0_1_1	1	1290	Acinetobacter oleivorans DR1	Bacteria|Proteobacteria|Gammaproteobacteria|Pseudomonadales|Moraxellaceae|Acinetobacter|Acinetobacter oleivorans|Acinetobacter oleivorans DR1	Bacteria	Proteobacteria	Gammaproteobacteria	Pseudomonadales	Moraxellaceae	gi|298698338|gb|CP002080.1|	Acinetobacter oleivorans DR1, complete genome	436717	1503471	1502182	1290	100	0	93.88
Pcub_MSU1_v1_02518_0_1_1	1	1926	Stenotrophomonas maltophilia D457	Bacteria|Proteobacteria|Gammaproteobacteria|Xanthomonadales|Xanthomonadaceae|Stenotrophomonas|Stenotrophomonas maltophilia group|Stenotrophomonas maltophilia|Stenotrophomonas maltophilia D457	Bacteria	Proteobacteria	Gammaproteobacteria	Xanthomonadales	Xanthomonadaceae	gi|384076029|emb|HE798556.1|	Stenotrophomonas maltophilia D457 complete genome	1163399	2661904	2659971	1938	100	0	93.91
Pcub_MSU1_v1_02521_0_1_1	1	1281	Stenotrophomonas maltophilia JV3	Bacteria|Proteobacteria|Gammaproteobacteria|Xanthomonadales|Xanthomonadaceae|Stenotrophomonas|Stenotrophomonas maltophilia group|Stenotrophomonas maltophilia|Stenotrophomonas maltophilia JV3	Bacteria	Proteobacteria	Gammaproteobacteria	Xanthomonadales	Xanthomonadaceae	gi|343776783|gb|CP002986.1|	Stenotrophomonas maltophilia JV3, complete genome	868597	1602046	1603326	1281	100	0	94.85
Pcub_MSU1_v1_02533_0_1_1	1	1206	Acinetobacter calcoaceticus PHEA-2	Bacteria|Proteobacteria|Gammaproteobacteria|Pseudomonadales|Moraxellaceae|Acinetobacter|Acinetobacter calcoaceticus/baumannii complex|Acinetobacter calcoaceticus|Acinetobacter calcoaceticus PHEA-2	Bacteria	Proteobacteria	Gammaproteobacteria	Pseudomonadales	Moraxellaceae	gi|325121063|gb|CP002177.1|	Acinetobacter calcoaceticus PHEA-2, complete genome	871585	2509021	2510226	1206	100	0	90.3
Pcub_MSU1_v1_02545_0_4_1	1	453	Pantholops hodgsonii	Eukaryota|Opisthokonta|Metazoa|Eumetazoa|Bilateria|Deuterostomia|Chordata|Craniata|Vertebrata|Gnathostomata|Teleostomi|Euteleostomi|Sarcopterygii|Dipnotetrapodomorpha|Tetrapoda|Amniota|Mammalia|Theria|Eutheria|Boreoeutheria|Laurasiatheria|Cetartiodactyla|Ruminantia|Pecora|Bovidae|Antilopinae|Pantholops|Pantholops hodgsonii	Eukaryota	Opisthokonta	Metazoa	Eumetazoa	Bilateria	gi|556740190|ref|XM_005965580.1|	PREDICTED: Pantholops hodgsonii 50S ribosomal protein L9, chloroplastic-like (LOC102339856), mRNA	59538	1	453	453	100	0	99.78
Pcub_MSU1_v1_02545_0_5_1	1	1425	Pantholops hodgsonii	Eukaryota|Opisthokonta|Metazoa|Eumetazoa|Bilateria|Deuterostomia|Chordata|Craniata|Vertebrata|Gnathostomata|Teleostomi|Euteleostomi|Sarcopterygii|Dipnotetrapodomorpha|Tetrapoda|Amniota|Mammalia|Theria|Eutheria|Boreoeutheria|Laurasiatheria|Cetartiodactyla|Ruminantia|Pecora|Bovidae|Antilopinae|Pantholops|Pantholops hodgsonii	Eukaryota	Opisthokonta	Metazoa	Eumetazoa	Bilateria	gi|556740192|ref|XM_005965581.1|	PREDICTED: Pantholops hodgsonii probable replicative DNA helicase-like (LOC102340214), mRNA	59538	1	1419	1425	100	0	98.6
Pcub_MSU1_v1_02545_0_7_1	1	654	Pantholops hodgsonii	Eukaryota|Opisthokonta|Metazoa|Eumetazoa|Bilateria|Deuterostomia|Chordata|Craniata|Vertebrata|Gnathostomata|Teleostomi|Euteleostomi|Sarcopterygii|Dipnotetrapodomorpha|Tetrapoda|Amniota|Mammalia|Theria|Eutheria|Boreoeutheria|Laurasiatheria|Cetartiodactyla|Ruminantia|Pecora|Bovidae|Antilopinae|Pantholops|Pantholops hodgsonii	Eukaryota	Opisthokonta	Metazoa	Eumetazoa	Bilateria	gi|556740188|ref|XM_005965579.1|	PREDICTED: Pantholops hodgsonii heat shock 70 kDa protein, mitochondrial-like (LOC102339488), mRNA	59538	502	1155	654	100	0	100
Pcub_MSU1_v1_02551_0_0_1	1	951	Acinetobacter oleivorans DR1	Bacteria|Proteobacteria|Gammaproteobacteria|Pseudomonadales|Moraxellaceae|Acinetobacter|Acinetobacter oleivorans|Acinetobacter oleivorans DR1	Bacteria	Proteobacteria	Gammaproteobacteria	Pseudomonadales	Moraxellaceae	gi|298698338|gb|CP002080.1|	Acinetobacter oleivorans DR1, complete genome	436717	3305140	3306090	951	100	0	97.9
Pcub_MSU1_v1_02553_0_4_1	1	1434	Acinetobacter oleivorans DR1	Bacteria|Proteobacteria|Gammaproteobacteria|Pseudomonadales|Moraxellaceae|Acinetobacter|Acinetobacter oleivorans|Acinetobacter oleivorans DR1	Bacteria	Proteobacteria	Gammaproteobacteria	Pseudomonadales	Moraxellaceae	gi|298698338|gb|CP002080.1|	Acinetobacter oleivorans DR1, complete genome	436717	798642	800075	1434	100	0	97.91
Pcub_MSU1_v1_02553_0_5_1	1	714	Acinetobacter oleivorans DR1	Bacteria|Proteobacteria|Gammaproteobacteria|Pseudomonadales|Moraxellaceae|Acinetobacter|Acinetobacter oleivorans|Acinetobacter oleivorans DR1	Bacteria	Proteobacteria	Gammaproteobacteria	Pseudomonadales	Moraxellaceae	gi|298698338|gb|CP002080.1|	Acinetobacter oleivorans DR1, complete genome	436717	797866	798579	714	100	0	97.48
Pcub_MSU1_v1_02556_0_1_1	1	1020	Delftia sp. Cs1-4	Bacteria|Proteobacteria|Betaproteobacteria|Burkholderiales|Comamonadaceae|Delftia|Delftia sp. Cs1-4	Bacteria	Proteobacteria	Betaproteobacteria	Burkholderiales	Comamonadaceae	gi|333741867|gb|CP002735.1|	Delftia sp. Cs1-4, complete genome	742013	3727070	3728089	1020	100	0	96.27
Pcub_MSU1_v1_02562_0_0_1	1	885	Delftia sp. Cs1-4	Bacteria|Proteobacteria|Betaproteobacteria|Burkholderiales|Comamonadaceae|Delftia|Delftia sp. Cs1-4	Bacteria	Proteobacteria	Betaproteobacteria	Burkholderiales	Comamonadaceae	gi|333741867|gb|CP002735.1|	Delftia sp. Cs1-4, complete genome	742013	5383505	5384389	885	100	0	97.63
Pcub_MSU1_v1_02562_0_3_1	1	549	Delftia sp. Cs1-4	Bacteria|Proteobacteria|Betaproteobacteria|Burkholderiales|Comamonadaceae|Delftia|Delftia sp. Cs1-4	Bacteria	Proteobacteria	Betaproteobacteria	Burkholderiales	Comamonadaceae	gi|333741867|gb|CP002735.1|	Delftia sp. Cs1-4, complete genome	742013	5388125	5387577	549	100	0	97.09
Pcub_MSU1_v1_02562_0_4_1	1	2937	Delftia acidovorans SPH-1	Bacteria|Proteobacteria|Betaproteobacteria|Burkholderiales|Comamonadaceae|Delftia|Delftia acidovorans|Delftia acidovorans SPH-1	Bacteria	Proteobacteria	Betaproteobacteria	Burkholderiales	Comamonadaceae	gi|160361034|gb|CP000884.1|	Delftia acidovorans SPH-1, complete genome	398578	2058042	2060978	2937	100	0	98.71
Pcub_MSU1_v1_02569_0_0_1	1	1506	Stenotrophomonas maltophilia D457	Bacteria|Proteobacteria|Gammaproteobacteria|Xanthomonadales|Xanthomonadaceae|Stenotrophomonas|Stenotrophomonas maltophilia group|Stenotrophomonas maltophilia|Stenotrophomonas maltophilia D457	Bacteria	Proteobacteria	Gammaproteobacteria	Xanthomonadales	Xanthomonadaceae	gi|384076029|emb|HE798556.1|	Stenotrophomonas maltophilia D457 complete genome	1163399	3334067	3335572	1506	100	0	97.74
Pcub_MSU1_v1_02573_0_3_1	1	567	Acidovorax sp. KKS102	Bacteria|Proteobacteria|Betaproteobacteria|Burkholderiales|Comamonadaceae|Acidovorax|Acidovorax sp. KKS102	Bacteria	Proteobacteria	Betaproteobacteria	Burkholderiales	Comamonadaceae	gi|407894523|gb|CP003872.1|	Acidovorax sp. KKS102, complete genome	358220	4922793	4923359	567	100	0	92.24
Pcub_MSU1_v1_02579_0_1_1	1	1869	Delftia sp. Cs1-4	Bacteria|Proteobacteria|Betaproteobacteria|Burkholderiales|Comamonadaceae|Delftia|Delftia sp. Cs1-4	Bacteria	Proteobacteria	Betaproteobacteria	Burkholderiales	Comamonadaceae	gi|333741867|gb|CP002735.1|	Delftia sp. Cs1-4, complete genome	742013	5724106	5722239	1869	100	0	97.97
Pcub_MSU1_v1_02581_0_2_1	1	1086	Delftia acidovorans SPH-1	Bacteria|Proteobacteria|Betaproteobacteria|Burkholderiales|Comamonadaceae|Delftia|Delftia acidovorans|Delftia acidovorans SPH-1	Bacteria	Proteobacteria	Betaproteobacteria	Burkholderiales	Comamonadaceae	gi|160361034|gb|CP000884.1|	Delftia acidovorans SPH-1, complete genome	398578	6418762	6419857	1096	100	0	97.81
Pcub_MSU1_v1_02582_0_4_1	1	1044	Delftia sp. Cs1-4	Bacteria|Proteobacteria|Betaproteobacteria|Burkholderiales|Comamonadaceae|Delftia|Delftia sp. Cs1-4	Bacteria	Proteobacteria	Betaproteobacteria	Burkholderiales	Comamonadaceae	gi|333741867|gb|CP002735.1|	Delftia sp. Cs1-4, complete genome	742013	4157909	4156866	1048	100	0	92.18
Pcub_MSU1_v1_02583_0_0_1	1	585	Stenotrophomonas maltophilia D457	Bacteria|Proteobacteria|Gammaproteobacteria|Xanthomonadales|Xanthomonadaceae|Stenotrophomonas|Stenotrophomonas maltophilia group|Stenotrophomonas maltophilia|Stenotrophomonas maltophilia D457	Bacteria	Proteobacteria	Gammaproteobacteria	Xanthomonadales	Xanthomonadaceae	gi|384076029|emb|HE798556.1|	Stenotrophomonas maltophilia D457 complete genome	1163399	760006	760590	585	100	0	99.83
Pcub_MSU1_v1_02583_0_1_1	1	1350	Stenotrophomonas maltophilia D457	Bacteria|Proteobacteria|Gammaproteobacteria|Xanthomonadales|Xanthomonadaceae|Stenotrophomonas|Stenotrophomonas maltophilia group|Stenotrophomonas maltophilia|Stenotrophomonas maltophilia D457	Bacteria	Proteobacteria	Gammaproteobacteria	Xanthomonadales	Xanthomonadaceae	gi|384076029|emb|HE798556.1|	Stenotrophomonas maltophilia D457 complete genome	1163399	763816	762467	1350	100	0	99.7
Pcub_MSU1_v1_02590_0_0_1	1	2637	Acinetobacter oleivorans DR1	Bacteria|Proteobacteria|Gammaproteobacteria|Pseudomonadales|Moraxellaceae|Acinetobacter|Acinetobacter oleivorans|Acinetobacter oleivorans DR1	Bacteria	Proteobacteria	Gammaproteobacteria	Pseudomonadales	Moraxellaceae	gi|298698338|gb|CP002080.1|	Acinetobacter oleivorans DR1, complete genome	436717	2888966	2891602	2637	100	0	96.06
Pcub_MSU1_v1_02594_0_1_1	1	387	Pseudomonas putida S12	Bacteria|Proteobacteria|Gammaproteobacteria|Pseudomonadales|Pseudomonadaceae|Pseudomonas|Pseudomonas putida group|Pseudomonas putida|Pseudomonas putida S12	Bacteria	Proteobacteria	Gammaproteobacteria	Pseudomonadales	Pseudomonadaceae	gi|734574563|gb|CP009974.1|	Pseudomonas putida S12, complete genome	1215087	1540770	1540384	387	100	0	100
Pcub_MSU1_v1_02594_0_2_1	1	1440	Pseudomonas putida S12	Bacteria|Proteobacteria|Gammaproteobacteria|Pseudomonadales|Pseudomonadaceae|Pseudomonas|Pseudomonas putida group|Pseudomonas putida|Pseudomonas putida S12	Bacteria	Proteobacteria	Gammaproteobacteria	Pseudomonadales	Pseudomonadaceae	gi|734574563|gb|CP009974.1|	Pseudomonas putida S12, complete genome	1215087	1540211	1538772	1440	100	0	99.72
Pcub_MSU1_v1_02598_0_0_1	1	1131	Stenotrophomonas maltophilia D457	Bacteria|Proteobacteria|Gammaproteobacteria|Xanthomonadales|Xanthomonadaceae|Stenotrophomonas|Stenotrophomonas maltophilia group|Stenotrophomonas maltophilia|Stenotrophomonas maltophilia D457	Bacteria	Proteobacteria	Gammaproteobacteria	Xanthomonadales	Xanthomonadaceae	gi|384076029|emb|HE798556.1|	Stenotrophomonas maltophilia D457 complete genome	1163399	1995286	1996416	1131	100	0	98.59
Pcub_MSU1_v1_02598_0_1_1	1	1881	Stenotrophomonas maltophilia D457	Bacteria|Proteobacteria|Gammaproteobacteria|Xanthomonadales|Xanthomonadaceae|Stenotrophomonas|Stenotrophomonas maltophilia group|Stenotrophomonas maltophilia|Stenotrophomonas maltophilia D457	Bacteria	Proteobacteria	Gammaproteobacteria	Xanthomonadales	Xanthomonadaceae	gi|384076029|emb|HE798556.1|	Stenotrophomonas maltophilia D457 complete genome	1163399	1996932	1998812	1881	100	0	99.89
Pcub_MSU1_v1_02608_0_10_1	1	231	Stenotrophomonas maltophilia D457	Bacteria|Proteobacteria|Gammaproteobacteria|Xanthomonadales|Xanthomonadaceae|Stenotrophomonas|Stenotrophomonas maltophilia group|Stenotrophomonas maltophilia|Stenotrophomonas maltophilia D457	Bacteria	Proteobacteria	Gammaproteobacteria	Xanthomonadales	Xanthomonadaceae	gi|384076029|emb|HE798556.1|	Stenotrophomonas maltophilia D457 complete genome	1163399	390481	390711	231	100	4e-116	100
Pcub_MSU1_v1_02608_0_3_1	1	1224	Stenotrophomonas maltophilia D457	Bacteria|Proteobacteria|Gammaproteobacteria|Xanthomonadales|Xanthomonadaceae|Stenotrophomonas|Stenotrophomonas maltophilia group|Stenotrophomonas maltophilia|Stenotrophomonas maltophilia D457	Bacteria	Proteobacteria	Gammaproteobacteria	Xanthomonadales	Xanthomonadaceae	gi|384076029|emb|HE798556.1|	Stenotrophomonas maltophilia D457 complete genome	1163399	389179	390402	1224	100	0	99.35
Pcub_MSU1_v1_02608_0_5_1	1	681	Stenotrophomonas maltophilia D457	Bacteria|Proteobacteria|Gammaproteobacteria|Xanthomonadales|Xanthomonadaceae|Stenotrophomonas|Stenotrophomonas maltophilia group|Stenotrophomonas maltophilia|Stenotrophomonas maltophilia D457	Bacteria	Proteobacteria	Gammaproteobacteria	Xanthomonadales	Xanthomonadaceae	gi|384076029|emb|HE798556.1|	Stenotrophomonas maltophilia D457 complete genome	1163399	388159	387479	681	100	0	99.12
Pcub_MSU1_v1_02612_0_2_1	1	726	Delftia sp. Cs1-4	Bacteria|Proteobacteria|Betaproteobacteria|Burkholderiales|Comamonadaceae|Delftia|Delftia sp. Cs1-4	Bacteria	Proteobacteria	Betaproteobacteria	Burkholderiales	Comamonadaceae	gi|333741867|gb|CP002735.1|	Delftia sp. Cs1-4, complete genome	742013	5032776	5032051	726	100	0	95.87
Pcub_MSU1_v1_02617_0_0_1	1	504	Delftia sp. Cs1-4	Bacteria|Proteobacteria|Betaproteobacteria|Burkholderiales|Comamonadaceae|Delftia|Delftia sp. Cs1-4	Bacteria	Proteobacteria	Betaproteobacteria	Burkholderiales	Comamonadaceae	gi|333741867|gb|CP002735.1|	Delftia sp. Cs1-4, complete genome	742013	4850589	4850086	504	100	0	97.02
Pcub_MSU1_v1_02653_0_1_1	1	1227	Stenotrophomonas maltophilia D457	Bacteria|Proteobacteria|Gammaproteobacteria|Xanthomonadales|Xanthomonadaceae|Stenotrophomonas|Stenotrophomonas maltophilia group|Stenotrophomonas maltophilia|Stenotrophomonas maltophilia D457	Bacteria	Proteobacteria	Gammaproteobacteria	Xanthomonadales	Xanthomonadaceae	gi|384076029|emb|HE798556.1|	Stenotrophomonas maltophilia D457 complete genome	1163399	1570547	1569321	1227	100	0	99.67
Pcub_MSU1_v1_02653_0_2_1	1	1497	Stenotrophomonas maltophilia D457	Bacteria|Proteobacteria|Gammaproteobacteria|Xanthomonadales|Xanthomonadaceae|Stenotrophomonas|Stenotrophomonas maltophilia group|Stenotrophomonas maltophilia|Stenotrophomonas maltophilia D457	Bacteria	Proteobacteria	Gammaproteobacteria	Xanthomonadales	Xanthomonadaceae	gi|384076029|emb|HE798556.1|	Stenotrophomonas maltophilia D457 complete genome	1163399	1570546	1572042	1497	100	0	99.73
Pcub_MSU1_v1_02656_0_2_1	1	612	Acinetobacter oleivorans DR1	Bacteria|Proteobacteria|Gammaproteobacteria|Pseudomonadales|Moraxellaceae|Acinetobacter|Acinetobacter oleivorans|Acinetobacter oleivorans DR1	Bacteria	Proteobacteria	Gammaproteobacteria	Pseudomonadales	Moraxellaceae	gi|298698338|gb|CP002080.1|	Acinetobacter oleivorans DR1, complete genome	436717	1056635	1057246	612	100	0	91.83
Pcub_MSU1_v1_02664_0_0_1	1	1542	Delftia sp. Cs1-4	Bacteria|Proteobacteria|Betaproteobacteria|Burkholderiales|Comamonadaceae|Delftia|Delftia sp. Cs1-4	Bacteria	Proteobacteria	Betaproteobacteria	Burkholderiales	Comamonadaceae	gi|333741867|gb|CP002735.1|	Delftia sp. Cs1-4, complete genome	742013	6597320	6598861	1542	100	0	96.63
Pcub_MSU1_v1_02664_0_1_1	1	732	Pantholops hodgsonii	Eukaryota|Opisthokonta|Metazoa|Eumetazoa|Bilateria|Deuterostomia|Chordata|Craniata|Vertebrata|Gnathostomata|Teleostomi|Euteleostomi|Sarcopterygii|Dipnotetrapodomorpha|Tetrapoda|Amniota|Mammalia|Theria|Eutheria|Boreoeutheria|Laurasiatheria|Cetartiodactyla|Ruminantia|Pecora|Bovidae|Antilopinae|Pantholops|Pantholops hodgsonii	Eukaryota	Opisthokonta	Metazoa	Eumetazoa	Bilateria	gi|556762681|ref|XM_005976574.1|	PREDICTED: Pantholops hodgsonii probable arginine--tRNA ligase, cytoplasmic-like (LOC102333156), mRNA	59538	1	732	732	100	0	99.73
Pcub_MSU1_v1_02672_0_1_1	1	1131	Acinetobacter oleivorans DR1	Bacteria|Proteobacteria|Gammaproteobacteria|Pseudomonadales|Moraxellaceae|Acinetobacter|Acinetobacter oleivorans|Acinetobacter oleivorans DR1	Bacteria	Proteobacteria	Gammaproteobacteria	Pseudomonadales	Moraxellaceae	gi|298698338|gb|CP002080.1|	Acinetobacter oleivorans DR1, complete genome	436717	1528817	1527687	1131	100	0	93.9
Pcub_MSU1_v1_02677_0_0_1	1	726	Delftia sp. Cs1-4	Bacteria|Proteobacteria|Betaproteobacteria|Burkholderiales|Comamonadaceae|Delftia|Delftia sp. Cs1-4	Bacteria	Proteobacteria	Betaproteobacteria	Burkholderiales	Comamonadaceae	gi|333741867|gb|CP002735.1|	Delftia sp. Cs1-4, complete genome	742013	3659583	3658858	727	100	0	96.7
Pcub_MSU1_v1_02678_0_0_1	1	279	Acidovorax sp. KKS102	Bacteria|Proteobacteria|Betaproteobacteria|Burkholderiales|Comamonadaceae|Acidovorax|Acidovorax sp. KKS102	Bacteria	Proteobacteria	Betaproteobacteria	Burkholderiales	Comamonadaceae	gi|407894523|gb|CP003872.1|	Acidovorax sp. KKS102, complete genome	358220	2837196	2836918	279	100	5e-101	91.04
Pcub_MSU1_v1_02679_0_0_1	1	828	Pantholops hodgsonii	Eukaryota|Opisthokonta|Metazoa|Eumetazoa|Bilateria|Deuterostomia|Chordata|Craniata|Vertebrata|Gnathostomata|Teleostomi|Euteleostomi|Sarcopterygii|Dipnotetrapodomorpha|Tetrapoda|Amniota|Mammalia|Theria|Eutheria|Boreoeutheria|Laurasiatheria|Cetartiodactyla|Ruminantia|Pecora|Bovidae|Antilopinae|Pantholops|Pantholops hodgsonii	Eukaryota	Opisthokonta	Metazoa	Eumetazoa	Bilateria	gi|556758038|ref|XM_005974294.1|	PREDICTED: Pantholops hodgsonii 2-oxoglutarate dehydrogenase, mitochondrial-like (LOC102315083), mRNA	59538	1	827	828	100	0	99.52
Pcub_MSU1_v1_02687_0_2_1	1	432	Delftia sp. Cs1-4	Bacteria|Proteobacteria|Betaproteobacteria|Burkholderiales|Comamonadaceae|Delftia|Delftia sp. Cs1-4	Bacteria	Proteobacteria	Betaproteobacteria	Burkholderiales	Comamonadaceae	gi|333741867|gb|CP002735.1|	Delftia sp. Cs1-4, complete genome	742013	210599	210168	432	100	0	96.76
Pcub_MSU1_v1_02690_0_0_1	1	615	Stenotrophomonas maltophilia D457	Bacteria|Proteobacteria|Gammaproteobacteria|Xanthomonadales|Xanthomonadaceae|Stenotrophomonas|Stenotrophomonas maltophilia group|Stenotrophomonas maltophilia|Stenotrophomonas maltophilia D457	Bacteria	Proteobacteria	Gammaproteobacteria	Xanthomonadales	Xanthomonadaceae	gi|384076029|emb|HE798556.1|	Stenotrophomonas maltophilia D457 complete genome	1163399	3322658	3322044	615	100	0	97.89
Pcub_MSU1_v1_02695_0_1_1	1	462	Pantholops hodgsonii	Eukaryota|Opisthokonta|Metazoa|Eumetazoa|Bilateria|Deuterostomia|Chordata|Craniata|Vertebrata|Gnathostomata|Teleostomi|Euteleostomi|Sarcopterygii|Dipnotetrapodomorpha|Tetrapoda|Amniota|Mammalia|Theria|Eutheria|Boreoeutheria|Laurasiatheria|Cetartiodactyla|Ruminantia|Pecora|Bovidae|Antilopinae|Pantholops|Pantholops hodgsonii	Eukaryota	Opisthokonta	Metazoa	Eumetazoa	Bilateria	gi|556740200|ref|XM_005965585.1|	PREDICTED: Pantholops hodgsonii molybdopterin synthase catalytic subunit-like (LOC102341625), mRNA	59538	55	516	462	100	0	99.35
Pcub_MSU1_v1_02695_0_3_1	1	1113	Pantholops hodgsonii	Eukaryota|Opisthokonta|Metazoa|Eumetazoa|Bilateria|Deuterostomia|Chordata|Craniata|Vertebrata|Gnathostomata|Teleostomi|Euteleostomi|Sarcopterygii|Dipnotetrapodomorpha|Tetrapoda|Amniota|Mammalia|Theria|Eutheria|Boreoeutheria|Laurasiatheria|Cetartiodactyla|Ruminantia|Pecora|Bovidae|Antilopinae|Pantholops|Pantholops hodgsonii	Eukaryota	Opisthokonta	Metazoa	Eumetazoa	Bilateria	gi|556740202|ref|XM_005965586.1|	PREDICTED: Pantholops hodgsonii chaperone protein ClpB3, chloroplastic-like (LOC102341985), mRNA	59538	1	1113	1113	100	0	98.2
Pcub_MSU1_v1_02702_0_0_1	1	1515	Stenotrophomonas maltophilia D457	Bacteria|Proteobacteria|Gammaproteobacteria|Xanthomonadales|Xanthomonadaceae|Stenotrophomonas|Stenotrophomonas maltophilia group|Stenotrophomonas maltophilia|Stenotrophomonas maltophilia D457	Bacteria	Proteobacteria	Gammaproteobacteria	Xanthomonadales	Xanthomonadaceae	gi|384076029|emb|HE798556.1|	Stenotrophomonas maltophilia D457 complete genome	1163399	2230353	2231867	1515	100	0	98.61
Pcub_MSU1_v1_02703_0_3_1	1	1437	Delftia sp. Cs1-4	Bacteria|Proteobacteria|Betaproteobacteria|Burkholderiales|Comamonadaceae|Delftia|Delftia sp. Cs1-4	Bacteria	Proteobacteria	Betaproteobacteria	Burkholderiales	Comamonadaceae	gi|333741867|gb|CP002735.1|	Delftia sp. Cs1-4, complete genome	742013	1714353	1712917	1437	100	0	97.84
Pcub_MSU1_v1_02706_0_2_1	1	3174	Delftia sp. Cs1-4	Bacteria|Proteobacteria|Betaproteobacteria|Burkholderiales|Comamonadaceae|Delftia|Delftia sp. Cs1-4	Bacteria	Proteobacteria	Betaproteobacteria	Burkholderiales	Comamonadaceae	gi|333741867|gb|CP002735.1|	Delftia sp. Cs1-4, complete genome	742013	5605308	5602135	3174	100	0	98.42
Pcub_MSU1_v1_02716_0_1_1	1	1047	Delftia acidovorans SPH-1	Bacteria|Proteobacteria|Betaproteobacteria|Burkholderiales|Comamonadaceae|Delftia|Delftia acidovorans|Delftia acidovorans SPH-1	Bacteria	Proteobacteria	Betaproteobacteria	Burkholderiales	Comamonadaceae	gi|160361034|gb|CP000884.1|	Delftia acidovorans SPH-1, complete genome	398578	1020502	1021548	1047	100	0	98.19
Pcub_MSU1_v1_02716_0_3_1	1	453	Delftia acidovorans SPH-1	Bacteria|Proteobacteria|Betaproteobacteria|Burkholderiales|Comamonadaceae|Delftia|Delftia acidovorans|Delftia acidovorans SPH-1	Bacteria	Proteobacteria	Betaproteobacteria	Burkholderiales	Comamonadaceae	gi|160361034|gb|CP000884.1|	Delftia acidovorans SPH-1, complete genome	398578	1022027	1021575	453	100	0	98.45
Pcub_MSU1_v1_02718_0_1_1	1	1380	Acinetobacter oleivorans DR1	Bacteria|Proteobacteria|Gammaproteobacteria|Pseudomonadales|Moraxellaceae|Acinetobacter|Acinetobacter oleivorans|Acinetobacter oleivorans DR1	Bacteria	Proteobacteria	Gammaproteobacteria	Pseudomonadales	Moraxellaceae	gi|298698338|gb|CP002080.1|	Acinetobacter oleivorans DR1, complete genome	436717	3860524	3861903	1381	100	0	93.34
Pcub_MSU1_v1_02719_0_3_1	1	1083	Delftia sp. Cs1-4	Bacteria|Proteobacteria|Betaproteobacteria|Burkholderiales|Comamonadaceae|Delftia|Delftia sp. Cs1-4	Bacteria	Proteobacteria	Betaproteobacteria	Burkholderiales	Comamonadaceae	gi|333741867|gb|CP002735.1|	Delftia sp. Cs1-4, complete genome	742013	1285236	1284154	1083	100	0	94.83
Pcub_MSU1_v1_02721_0_0_1	1	2160	Stenotrophomonas maltophilia D457	Bacteria|Proteobacteria|Gammaproteobacteria|Xanthomonadales|Xanthomonadaceae|Stenotrophomonas|Stenotrophomonas maltophilia group|Stenotrophomonas maltophilia|Stenotrophomonas maltophilia D457	Bacteria	Proteobacteria	Gammaproteobacteria	Xanthomonadales	Xanthomonadaceae	gi|384076029|emb|HE798556.1|	Stenotrophomonas maltophilia D457 complete genome	1163399	2762328	2764487	2160	100	0	99.12
Pcub_MSU1_v1_02723_0_0_1	1	627	Acinetobacter oleivorans DR1	Bacteria|Proteobacteria|Gammaproteobacteria|Pseudomonadales|Moraxellaceae|Acinetobacter|Acinetobacter oleivorans|Acinetobacter oleivorans DR1	Bacteria	Proteobacteria	Gammaproteobacteria	Pseudomonadales	Moraxellaceae	gi|298698338|gb|CP002080.1|	Acinetobacter oleivorans DR1, complete genome	436717	3956470	3955844	627	100	0	98.09
Pcub_MSU1_v1_02723_0_1_1	1	546	Acinetobacter oleivorans DR1	Bacteria|Proteobacteria|Gammaproteobacteria|Pseudomonadales|Moraxellaceae|Acinetobacter|Acinetobacter oleivorans|Acinetobacter oleivorans DR1	Bacteria	Proteobacteria	Gammaproteobacteria	Pseudomonadales	Moraxellaceae	gi|298698338|gb|CP002080.1|	Acinetobacter oleivorans DR1, complete genome	436717	3954061	3954606	546	100	0	95.05
Pcub_MSU1_v1_02724_0_0_1	1	987	Delftia sp. Cs1-4	Bacteria|Proteobacteria|Betaproteobacteria|Burkholderiales|Comamonadaceae|Delftia|Delftia sp. Cs1-4	Bacteria	Proteobacteria	Betaproteobacteria	Burkholderiales	Comamonadaceae	gi|333741867|gb|CP002735.1|	Delftia sp. Cs1-4, complete genome	742013	3977587	3978573	987	100	0	95.04
Pcub_MSU1_v1_02724_0_1_1	1	2589	Delftia sp. Cs1-4	Bacteria|Proteobacteria|Betaproteobacteria|Burkholderiales|Comamonadaceae|Delftia|Delftia sp. Cs1-4	Bacteria	Proteobacteria	Betaproteobacteria	Burkholderiales	Comamonadaceae	gi|333741867|gb|CP002735.1|	Delftia sp. Cs1-4, complete genome	742013	3974730	3977318	2590	100	0	95.14
Pcub_MSU1_v1_02728_0_1_1	1	1197	Delftia sp. Cs1-4	Bacteria|Proteobacteria|Betaproteobacteria|Burkholderiales|Comamonadaceae|Delftia|Delftia sp. Cs1-4	Bacteria	Proteobacteria	Betaproteobacteria	Burkholderiales	Comamonadaceae	gi|333741867|gb|CP002735.1|	Delftia sp. Cs1-4, complete genome	742013	5822820	5821624	1197	100	0	98.91
Pcub_MSU1_v1_02740_0_0_1	1	1701	Pantholops hodgsonii	Eukaryota|Opisthokonta|Metazoa|Eumetazoa|Bilateria|Deuterostomia|Chordata|Craniata|Vertebrata|Gnathostomata|Teleostomi|Euteleostomi|Sarcopterygii|Dipnotetrapodomorpha|Tetrapoda|Amniota|Mammalia|Theria|Eutheria|Boreoeutheria|Laurasiatheria|Cetartiodactyla|Ruminantia|Pecora|Bovidae|Antilopinae|Pantholops|Pantholops hodgsonii	Eukaryota	Opisthokonta	Metazoa	Eumetazoa	Bilateria	gi|556765209|ref|XM_005977808.1|	PREDICTED: Pantholops hodgsonii 4-coumarate--CoA ligase 2-like (LOC102333396), mRNA	59538	1	1701	1702	100	0	97.88
Pcub_MSU1_v1_02746_0_0_1	1	648	Stenotrophomonas maltophilia D457	Bacteria|Proteobacteria|Gammaproteobacteria|Xanthomonadales|Xanthomonadaceae|Stenotrophomonas|Stenotrophomonas maltophilia group|Stenotrophomonas maltophilia|Stenotrophomonas maltophilia D457	Bacteria	Proteobacteria	Gammaproteobacteria	Xanthomonadales	Xanthomonadaceae	gi|384076029|emb|HE798556.1|	Stenotrophomonas maltophilia D457 complete genome	1163399	3873460	3874107	648	100	0	99.69
Pcub_MSU1_v1_02746_0_1_1	1	666	Stenotrophomonas maltophilia K279a	Bacteria|Proteobacteria|Gammaproteobacteria|Xanthomonadales|Xanthomonadaceae|Stenotrophomonas|Stenotrophomonas maltophilia group|Stenotrophomonas maltophilia|Stenotrophomonas maltophilia K279a	Bacteria	Proteobacteria	Gammaproteobacteria	Xanthomonadales	Xanthomonadaceae	gi|190010013|emb|AM743169.1|	Stenotrophomonas maltophilia K279a complete genome, strain K279a	522373	3956722	3956057	666	100	0	95.65
Pcub_MSU1_v1_02752_0_0_1	1	735	Acinetobacter oleivorans DR1	Bacteria|Proteobacteria|Gammaproteobacteria|Pseudomonadales|Moraxellaceae|Acinetobacter|Acinetobacter oleivorans|Acinetobacter oleivorans DR1	Bacteria	Proteobacteria	Gammaproteobacteria	Pseudomonadales	Moraxellaceae	gi|298698338|gb|CP002080.1|	Acinetobacter oleivorans DR1, complete genome	436717	715704	714970	735	100	0	94.42
Pcub_MSU1_v1_02752_0_1_1	1	1197	Acinetobacter oleivorans DR1	Bacteria|Proteobacteria|Gammaproteobacteria|Pseudomonadales|Moraxellaceae|Acinetobacter|Acinetobacter oleivorans|Acinetobacter oleivorans DR1	Bacteria	Proteobacteria	Gammaproteobacteria	Pseudomonadales	Moraxellaceae	gi|298698338|gb|CP002080.1|	Acinetobacter oleivorans DR1, complete genome	436717	714738	713542	1197	100	0	92.82
Pcub_MSU1_v1_02776_0_0_1	1	1170	Pseudomonas putida S12	Bacteria|Proteobacteria|Gammaproteobacteria|Pseudomonadales|Pseudomonadaceae|Pseudomonas|Pseudomonas putida group|Pseudomonas putida|Pseudomonas putida S12	Bacteria	Proteobacteria	Gammaproteobacteria	Pseudomonadales	Pseudomonadaceae	gi|734574563|gb|CP009974.1|	Pseudomonas putida S12, complete genome	1215087	2106201	2105032	1170	100	0	99.83
Pcub_MSU1_v1_02779_0_1_1	1	1119	Acinetobacter oleivorans DR1	Bacteria|Proteobacteria|Gammaproteobacteria|Pseudomonadales|Moraxellaceae|Acinetobacter|Acinetobacter oleivorans|Acinetobacter oleivorans DR1	Bacteria	Proteobacteria	Gammaproteobacteria	Pseudomonadales	Moraxellaceae	gi|298698338|gb|CP002080.1|	Acinetobacter oleivorans DR1, complete genome	436717	3681234	3682352	1119	100	0	97.05
Pcub_MSU1_v1_02783_0_4_1	1	756	Stenotrophomonas maltophilia D457	Bacteria|Proteobacteria|Gammaproteobacteria|Xanthomonadales|Xanthomonadaceae|Stenotrophomonas|Stenotrophomonas maltophilia group|Stenotrophomonas maltophilia|Stenotrophomonas maltophilia D457	Bacteria	Proteobacteria	Gammaproteobacteria	Xanthomonadales	Xanthomonadaceae	gi|384076029|emb|HE798556.1|	Stenotrophomonas maltophilia D457 complete genome	1163399	2362751	2363506	756	100	0	98.54
Pcub_MSU1_v1_02785_0_2_1	1	768	Delftia acidovorans SPH-1	Bacteria|Proteobacteria|Betaproteobacteria|Burkholderiales|Comamonadaceae|Delftia|Delftia acidovorans|Delftia acidovorans SPH-1	Bacteria	Proteobacteria	Betaproteobacteria	Burkholderiales	Comamonadaceae	gi|160361034|gb|CP000884.1|	Delftia acidovorans SPH-1, complete genome	398578	1717297	1716530	768	100	0	96.88
Pcub_MSU1_v1_02787_0_1_1	1	1455	Stenotrophomonas maltophilia D457	Bacteria|Proteobacteria|Gammaproteobacteria|Xanthomonadales|Xanthomonadaceae|Stenotrophomonas|Stenotrophomonas maltophilia group|Stenotrophomonas maltophilia|Stenotrophomonas maltophilia D457	Bacteria	Proteobacteria	Gammaproteobacteria	Xanthomonadales	Xanthomonadaceae	gi|384076029|emb|HE798556.1|	Stenotrophomonas maltophilia D457 complete genome	1163399	3029222	3027763	1460	100	0	94.86
Pcub_MSU1_v1_02788_0_0_1	1	1383	Delftia sp. Cs1-4	Bacteria|Proteobacteria|Betaproteobacteria|Burkholderiales|Comamonadaceae|Delftia|Delftia sp. Cs1-4	Bacteria	Proteobacteria	Betaproteobacteria	Burkholderiales	Comamonadaceae	gi|333741867|gb|CP002735.1|	Delftia sp. Cs1-4, complete genome	742013	3223376	3224758	1383	100	0	96.46
Pcub_MSU1_v1_02792_0_3_1	1	2724	Stenotrophomonas maltophilia D457	Bacteria|Proteobacteria|Gammaproteobacteria|Xanthomonadales|Xanthomonadaceae|Stenotrophomonas|Stenotrophomonas maltophilia group|Stenotrophomonas maltophilia|Stenotrophomonas maltophilia D457	Bacteria	Proteobacteria	Gammaproteobacteria	Xanthomonadales	Xanthomonadaceae	gi|384076029|emb|HE798556.1|	Stenotrophomonas maltophilia D457 complete genome	1163399	4413566	4416302	2737	100	0	99.05
Pcub_MSU1_v1_02794_0_2_1	1	969	Delftia acidovorans SPH-1	Bacteria|Proteobacteria|Betaproteobacteria|Burkholderiales|Comamonadaceae|Delftia|Delftia acidovorans|Delftia acidovorans SPH-1	Bacteria	Proteobacteria	Betaproteobacteria	Burkholderiales	Comamonadaceae	gi|160361034|gb|CP000884.1|	Delftia acidovorans SPH-1, complete genome	398578	133486	132518	969	100	0	93.4
Pcub_MSU1_v1_02804_0_0_1	1	966	Delftia acidovorans SPH-1	Bacteria|Proteobacteria|Betaproteobacteria|Burkholderiales|Comamonadaceae|Delftia|Delftia acidovorans|Delftia acidovorans SPH-1	Bacteria	Proteobacteria	Betaproteobacteria	Burkholderiales	Comamonadaceae	gi|160361034|gb|CP000884.1|	Delftia acidovorans SPH-1, complete genome	398578	756829	755864	966	100	0	95.76
Pcub_MSU1_v1_02804_0_1_1	1	1044	Delftia sp. Cs1-4	Bacteria|Proteobacteria|Betaproteobacteria|Burkholderiales|Comamonadaceae|Delftia|Delftia sp. Cs1-4	Bacteria	Proteobacteria	Betaproteobacteria	Burkholderiales	Comamonadaceae	gi|333741867|gb|CP002735.1|	Delftia sp. Cs1-4, complete genome	742013	6581855	6580812	1044	100	0	98.37
Pcub_MSU1_v1_02804_0_2_1	1	975	Delftia sp. Cs1-4	Bacteria|Proteobacteria|Betaproteobacteria|Burkholderiales|Comamonadaceae|Delftia|Delftia sp. Cs1-4	Bacteria	Proteobacteria	Betaproteobacteria	Burkholderiales	Comamonadaceae	gi|333741867|gb|CP002735.1|	Delftia sp. Cs1-4, complete genome	742013	6583708	6582734	975	100	0	98.87
Pcub_MSU1_v1_02805_0_0_1	1	771	Delftia acidovorans SPH-1	Bacteria|Proteobacteria|Betaproteobacteria|Burkholderiales|Comamonadaceae|Delftia|Delftia acidovorans|Delftia acidovorans SPH-1	Bacteria	Proteobacteria	Betaproteobacteria	Burkholderiales	Comamonadaceae	gi|160361034|gb|CP000884.1|	Delftia acidovorans SPH-1, complete genome	398578	1066710	1067480	771	100	0	98.96
Pcub_MSU1_v1_02812_0_2_1	1	621	Acinetobacter oleivorans DR1	Bacteria|Proteobacteria|Gammaproteobacteria|Pseudomonadales|Moraxellaceae|Acinetobacter|Acinetobacter oleivorans|Acinetobacter oleivorans DR1	Bacteria	Proteobacteria	Gammaproteobacteria	Pseudomonadales	Moraxellaceae	gi|298698338|gb|CP002080.1|	Acinetobacter oleivorans DR1, complete genome	436717	1448559	1449179	621	100	0	95.65
Pcub_MSU1_v1_02826_0_2_1	1	1149	Delftia sp. Cs1-4	Bacteria|Proteobacteria|Betaproteobacteria|Burkholderiales|Comamonadaceae|Delftia|Delftia sp. Cs1-4	Bacteria	Proteobacteria	Betaproteobacteria	Burkholderiales	Comamonadaceae	gi|333741867|gb|CP002735.1|	Delftia sp. Cs1-4, complete genome	742013	6324621	6323473	1150	100	0	95.3
Pcub_MSU1_v1_02832_0_1_1	1	951	Stenotrophomonas maltophilia D457	Bacteria|Proteobacteria|Gammaproteobacteria|Xanthomonadales|Xanthomonadaceae|Stenotrophomonas|Stenotrophomonas maltophilia group|Stenotrophomonas maltophilia|Stenotrophomonas maltophilia D457	Bacteria	Proteobacteria	Gammaproteobacteria	Xanthomonadales	Xanthomonadaceae	gi|384076029|emb|HE798556.1|	Stenotrophomonas maltophilia D457 complete genome	1163399	2855283	2856233	951	100	0	100
Pcub_MSU1_v1_02835_0_0_1	1	924	Acinetobacter baumannii	Bacteria|Proteobacteria|Gammaproteobacteria|Pseudomonadales|Moraxellaceae|Acinetobacter|Acinetobacter calcoaceticus/baumannii complex|Acinetobacter baumannii	Bacteria	Proteobacteria	Gammaproteobacteria	Pseudomonadales	Moraxellaceae	gi|827403829|gb|CP010779.1|	Acinetobacter baumannii strain XH386, complete genome	470	2491137	2490214	924	100	0	95.24
Pcub_MSU1_v1_02835_0_1_1	1	606	Acinetobacter baumannii	Bacteria|Proteobacteria|Gammaproteobacteria|Pseudomonadales|Moraxellaceae|Acinetobacter|Acinetobacter calcoaceticus/baumannii complex|Acinetobacter baumannii	Bacteria	Proteobacteria	Gammaproteobacteria	Pseudomonadales	Moraxellaceae	gi|742926533|gb|CP010368.1|	Acinetobacter baumannii strain 6411, complete genome	470	2388519	2387914	606	100	0	95.21
Pcub_MSU1_v1_02845_0_2_1	1	1374	Delftia acidovorans SPH-1	Bacteria|Proteobacteria|Betaproteobacteria|Burkholderiales|Comamonadaceae|Delftia|Delftia acidovorans|Delftia acidovorans SPH-1	Bacteria	Proteobacteria	Betaproteobacteria	Burkholderiales	Comamonadaceae	gi|160361034|gb|CP000884.1|	Delftia acidovorans SPH-1, complete genome	398578	6083023	6084396	1374	100	0	95.12
Pcub_MSU1_v1_02846_0_1_1	1	1188	Pantholops hodgsonii	Eukaryota|Opisthokonta|Metazoa|Eumetazoa|Bilateria|Deuterostomia|Chordata|Craniata|Vertebrata|Gnathostomata|Teleostomi|Euteleostomi|Sarcopterygii|Dipnotetrapodomorpha|Tetrapoda|Amniota|Mammalia|Theria|Eutheria|Boreoeutheria|Laurasiatheria|Cetartiodactyla|Ruminantia|Pecora|Bovidae|Antilopinae|Pantholops|Pantholops hodgsonii	Eukaryota	Opisthokonta	Metazoa	Eumetazoa	Bilateria	gi|556768575|ref|XM_005979441.1|	PREDICTED: Pantholops hodgsonii probable acetyl-CoA acetyltransferase, cytosolic 2-like (LOC102330918), mRNA	59538	1	1188	1188	100	0	99.24
Pcub_MSU1_v1_02850_0_1_1	1	2517	Stenotrophomonas maltophilia D457	Bacteria|Proteobacteria|Gammaproteobacteria|Xanthomonadales|Xanthomonadaceae|Stenotrophomonas|Stenotrophomonas maltophilia group|Stenotrophomonas maltophilia|Stenotrophomonas maltophilia D457	Bacteria	Proteobacteria	Gammaproteobacteria	Xanthomonadales	Xanthomonadaceae	gi|384076029|emb|HE798556.1|	Stenotrophomonas maltophilia D457 complete genome	1163399	3851756	3849187	2570	100	0	96.03
Pcub_MSU1_v1_02850_0_2_1	1	300	Stenotrophomonas maltophilia D457	Bacteria|Proteobacteria|Gammaproteobacteria|Xanthomonadales|Xanthomonadaceae|Stenotrophomonas|Stenotrophomonas maltophilia group|Stenotrophomonas maltophilia|Stenotrophomonas maltophilia D457	Bacteria	Proteobacteria	Gammaproteobacteria	Xanthomonadales	Xanthomonadaceae	gi|384076029|emb|HE798556.1|	Stenotrophomonas maltophilia D457 complete genome	1163399	3849076	3848777	300	100	1e-152	99.67
Pcub_MSU1_v1_02850_0_3_1	1	1431	Stenotrophomonas maltophilia D457	Bacteria|Proteobacteria|Gammaproteobacteria|Xanthomonadales|Xanthomonadaceae|Stenotrophomonas|Stenotrophomonas maltophilia group|Stenotrophomonas maltophilia|Stenotrophomonas maltophilia D457	Bacteria	Proteobacteria	Gammaproteobacteria	Xanthomonadales	Xanthomonadaceae	gi|384076029|emb|HE798556.1|	Stenotrophomonas maltophilia D457 complete genome	1163399	3848670	3847240	1431	100	0	98.53
Pcub_MSU1_v1_02852_0_0_1	1	213	Delftia acidovorans SPH-1	Bacteria|Proteobacteria|Betaproteobacteria|Burkholderiales|Comamonadaceae|Delftia|Delftia acidovorans|Delftia acidovorans SPH-1	Bacteria	Proteobacteria	Betaproteobacteria	Burkholderiales	Comamonadaceae	gi|160361034|gb|CP000884.1|	Delftia acidovorans SPH-1, complete genome	398578	3273045	3272833	213	100	7e-98	97.65
Pcub_MSU1_v1_02852_0_1_1	1	801	Delftia acidovorans SPH-1	Bacteria|Proteobacteria|Betaproteobacteria|Burkholderiales|Comamonadaceae|Delftia|Delftia acidovorans|Delftia acidovorans SPH-1	Bacteria	Proteobacteria	Betaproteobacteria	Burkholderiales	Comamonadaceae	gi|160361034|gb|CP000884.1|	Delftia acidovorans SPH-1, complete genome	398578	3274637	3273837	801	100	0	97.5
Pcub_MSU1_v1_02855_0_3_1	1	507	Acidovorax citrulli AAC00-1	Bacteria|Proteobacteria|Betaproteobacteria|Burkholderiales|Comamonadaceae|Acidovorax|Acidovorax citrulli|Acidovorax citrulli AAC00-1	Bacteria	Proteobacteria	Betaproteobacteria	Burkholderiales	Comamonadaceae	gi|120587178|gb|CP000512.1|	Acidovorax citrulli AAC00-1, complete genome	397945	2544896	2544390	507	100	0	92.9
Pcub_MSU1_v1_02860_0_0_1	1	900	Delftia sp. Cs1-4	Bacteria|Proteobacteria|Betaproteobacteria|Burkholderiales|Comamonadaceae|Delftia|Delftia sp. Cs1-4	Bacteria	Proteobacteria	Betaproteobacteria	Burkholderiales	Comamonadaceae	gi|333741867|gb|CP002735.1|	Delftia sp. Cs1-4, complete genome	742013	5797905	5797006	900	100	0	98.33
Pcub_MSU1_v1_02860_0_1_1	1	738	Pantholops hodgsonii	Eukaryota|Opisthokonta|Metazoa|Eumetazoa|Bilateria|Deuterostomia|Chordata|Craniata|Vertebrata|Gnathostomata|Teleostomi|Euteleostomi|Sarcopterygii|Dipnotetrapodomorpha|Tetrapoda|Amniota|Mammalia|Theria|Eutheria|Boreoeutheria|Laurasiatheria|Cetartiodactyla|Ruminantia|Pecora|Bovidae|Antilopinae|Pantholops|Pantholops hodgsonii	Eukaryota	Opisthokonta	Metazoa	Eumetazoa	Bilateria	gi|556716285|ref|XM_005954006.1|	PREDICTED: Pantholops hodgsonii sulfate/thiosulfate import ATP-binding protein cysA-like (LOC102329663), mRNA	59538	1	738	738	100	0	99.05
Pcub_MSU1_v1_02865_0_1_1	1	822	Delftia acidovorans SPH-1	Bacteria|Proteobacteria|Betaproteobacteria|Burkholderiales|Comamonadaceae|Delftia|Delftia acidovorans|Delftia acidovorans SPH-1	Bacteria	Proteobacteria	Betaproteobacteria	Burkholderiales	Comamonadaceae	gi|160361034|gb|CP000884.1|	Delftia acidovorans SPH-1, complete genome	398578	5992217	5991396	822	100	0	94.89
Pcub_MSU1_v1_02865_0_2_1	1	699	Delftia acidovorans SPH-1	Bacteria|Proteobacteria|Betaproteobacteria|Burkholderiales|Comamonadaceae|Delftia|Delftia acidovorans|Delftia acidovorans SPH-1	Bacteria	Proteobacteria	Betaproteobacteria	Burkholderiales	Comamonadaceae	gi|160361034|gb|CP000884.1|	Delftia acidovorans SPH-1, complete genome	398578	5994618	5993920	699	100	0	96.57
Pcub_MSU1_v1_02867_0_2_1	1	840	Stenotrophomonas maltophilia D457	Bacteria|Proteobacteria|Gammaproteobacteria|Xanthomonadales|Xanthomonadaceae|Stenotrophomonas|Stenotrophomonas maltophilia group|Stenotrophomonas maltophilia|Stenotrophomonas maltophilia D457	Bacteria	Proteobacteria	Gammaproteobacteria	Xanthomonadales	Xanthomonadaceae	gi|384076029|emb|HE798556.1|	Stenotrophomonas maltophilia D457 complete genome	1163399	632130	631291	840	100	0	99.4
Pcub_MSU1_v1_02867_0_3_1	1	588	Stenotrophomonas maltophilia D457	Bacteria|Proteobacteria|Gammaproteobacteria|Xanthomonadales|Xanthomonadaceae|Stenotrophomonas|Stenotrophomonas maltophilia group|Stenotrophomonas maltophilia|Stenotrophomonas maltophilia D457	Bacteria	Proteobacteria	Gammaproteobacteria	Xanthomonadales	Xanthomonadaceae	gi|384076029|emb|HE798556.1|	Stenotrophomonas maltophilia D457 complete genome	1163399	629988	630575	588	100	0	99.49
Pcub_MSU1_v1_02870_0_3_1	1	528	Stenotrophomonas maltophilia D457	Bacteria|Proteobacteria|Gammaproteobacteria|Xanthomonadales|Xanthomonadaceae|Stenotrophomonas|Stenotrophomonas maltophilia group|Stenotrophomonas maltophilia|Stenotrophomonas maltophilia D457	Bacteria	Proteobacteria	Gammaproteobacteria	Xanthomonadales	Xanthomonadaceae	gi|384076029|emb|HE798556.1|	Stenotrophomonas maltophilia D457 complete genome	1163399	3071484	3072022	539	100	0	97.22
Pcub_MSU1_v1_02872_0_0_1	1	945	Delftia sp. Cs1-4	Bacteria|Proteobacteria|Betaproteobacteria|Burkholderiales|Comamonadaceae|Delftia|Delftia sp. Cs1-4	Bacteria	Proteobacteria	Betaproteobacteria	Burkholderiales	Comamonadaceae	gi|333741867|gb|CP002735.1|	Delftia sp. Cs1-4, complete genome	742013	2531836	2532780	945	100	0	96.51
Pcub_MSU1_v1_02882_0_0_1	1	1461	Delftia sp. I24	Bacteria|Proteobacteria|Betaproteobacteria|Burkholderiales|Comamonadaceae|Delftia|Delftia sp. I24	Bacteria	Proteobacteria	Betaproteobacteria	Burkholderiales	Comamonadaceae	gi|154705701|gb|EF407881.1|	Delftia sp. I24 hydantoin hydrolyzing gene cluster, partial sequence	445988	3330	4790	1461	100	0	97.6
Pcub_MSU1_v1_02883_0_2_1	1	4059	Stenotrophomonas maltophilia D457	Bacteria|Proteobacteria|Gammaproteobacteria|Xanthomonadales|Xanthomonadaceae|Stenotrophomonas|Stenotrophomonas maltophilia group|Stenotrophomonas maltophilia|Stenotrophomonas maltophilia D457	Bacteria	Proteobacteria	Gammaproteobacteria	Xanthomonadales	Xanthomonadaceae	gi|384076029|emb|HE798556.1|	Stenotrophomonas maltophilia D457 complete genome	1163399	3317771	3313713	4059	100	0	99.14
Pcub_MSU1_v1_02895_0_1_1	1	252	Acinetobacter calcoaceticus PHEA-2	Bacteria|Proteobacteria|Gammaproteobacteria|Pseudomonadales|Moraxellaceae|Acinetobacter|Acinetobacter calcoaceticus/baumannii complex|Acinetobacter calcoaceticus|Acinetobacter calcoaceticus PHEA-2	Bacteria	Proteobacteria	Gammaproteobacteria	Pseudomonadales	Moraxellaceae	gi|325121063|gb|CP002177.1|	Acinetobacter calcoaceticus PHEA-2, complete genome	871585	97078	97329	252	100	2e-119	98.02
Pcub_MSU1_v1_02900_0_1_1	1	372	Enterobacter sp. 638	Bacteria|Proteobacteria|Gammaproteobacteria|Enterobacteriales|Enterobacteriaceae|Enterobacter|Enterobacter sp. 638	Bacteria	Proteobacteria	Gammaproteobacteria	Enterobacteriales	Enterobacteriaceae	gi|145316543|gb|CP000653.1|	Enterobacter sp. 638, complete genome	399742	4048290	4047919	372	100	0	99.46
Pcub_MSU1_v1_02900_0_2_1	1	255	Enterobacter asburiae	Bacteria|Proteobacteria|Gammaproteobacteria|Enterobacteriales|Enterobacteriaceae|Enterobacter|Enterobacter cloacae complex|Enterobacter asburiae	Bacteria	Proteobacteria	Gammaproteobacteria	Enterobacteriales	Enterobacteriaceae	gi|910286592|gb|CP012162.1|	Enterobacter asburiae strain 35734, complete genome	61645	4500119	4499865	255	100	9e-128	99.61
Pcub_MSU1_v1_02900_0_3_1	1	822	Enterobacter cloacae	Bacteria|Proteobacteria|Gammaproteobacteria|Enterobacteriales|Enterobacteriaceae|Enterobacter|Enterobacter cloacae complex|Enterobacter cloacae	Bacteria	Proteobacteria	Gammaproteobacteria	Enterobacteriales	Enterobacteriaceae	gi|723220061|gb|CP009850.1|	Enterobacter cloacae strain ECNIH4, complete genome	550	479285	480106	822	100	0	98.54
Pcub_MSU1_v1_02901_0_2_1	1	1779	Delftia sp. Cs1-4	Bacteria|Proteobacteria|Betaproteobacteria|Burkholderiales|Comamonadaceae|Delftia|Delftia sp. Cs1-4	Bacteria	Proteobacteria	Betaproteobacteria	Burkholderiales	Comamonadaceae	gi|333741867|gb|CP002735.1|	Delftia sp. Cs1-4, complete genome	742013	877442	875664	1779	100	0	97.53
Pcub_MSU1_v1_02904_0_3_1	1	1497	Acidovorax avenae subsp. avenae ATCC 19860	Bacteria|Proteobacteria|Betaproteobacteria|Burkholderiales|Comamonadaceae|Acidovorax|Acidovorax avenae|Acidovorax avenae subsp. avenae|Acidovorax avenae subsp. avenae ATCC 19860	Bacteria	Proteobacteria	Betaproteobacteria	Burkholderiales	Comamonadaceae	gi|323371659|gb|CP002521.1|	Acidovorax avenae subsp. avenae ATCC 19860, complete genome	643561	1407888	1409384	1504	100	0	90.43
Pcub_MSU1_v1_02909_0_1_1	1	1680	Delftia acidovorans SPH-1	Bacteria|Proteobacteria|Betaproteobacteria|Burkholderiales|Comamonadaceae|Delftia|Delftia acidovorans|Delftia acidovorans SPH-1	Bacteria	Proteobacteria	Betaproteobacteria	Burkholderiales	Comamonadaceae	gi|160361034|gb|CP000884.1|	Delftia acidovorans SPH-1, complete genome	398578	5698665	5700350	1688	100	0	96.09
Pcub_MSU1_v1_02912_0_1_1	1	1947	Delftia sp. Cs1-4	Bacteria|Proteobacteria|Betaproteobacteria|Burkholderiales|Comamonadaceae|Delftia|Delftia sp. Cs1-4	Bacteria	Proteobacteria	Betaproteobacteria	Burkholderiales	Comamonadaceae	gi|333741867|gb|CP002735.1|	Delftia sp. Cs1-4, complete genome	742013	6013958	6012006	1953	100	0	96.93
Pcub_MSU1_v1_02915_0_0_1	1	1446	Stenotrophomonas maltophilia D457	Bacteria|Proteobacteria|Gammaproteobacteria|Xanthomonadales|Xanthomonadaceae|Stenotrophomonas|Stenotrophomonas maltophilia group|Stenotrophomonas maltophilia|Stenotrophomonas maltophilia D457	Bacteria	Proteobacteria	Gammaproteobacteria	Xanthomonadales	Xanthomonadaceae	gi|384076029|emb|HE798556.1|	Stenotrophomonas maltophilia D457 complete genome	1163399	2135409	2136873	1465	100	0	97.95
Pcub_MSU1_v1_02916_0_0_1	1	618	Pseudomonas putida F1	Bacteria|Proteobacteria|Gammaproteobacteria|Pseudomonadales|Pseudomonadaceae|Pseudomonas|Pseudomonas putida group|Pseudomonas putida|Pseudomonas putida F1	Bacteria	Proteobacteria	Gammaproteobacteria	Pseudomonadales	Pseudomonadaceae	gi|148509317|gb|CP000712.1|	Pseudomonas putida F1, complete genome	351746	1368934	1368317	618	100	0	93.53
Pcub_MSU1_v1_02918_0_0_1	1	786	Stenotrophomonas maltophilia D457	Bacteria|Proteobacteria|Gammaproteobacteria|Xanthomonadales|Xanthomonadaceae|Stenotrophomonas|Stenotrophomonas maltophilia group|Stenotrophomonas maltophilia|Stenotrophomonas maltophilia D457	Bacteria	Proteobacteria	Gammaproteobacteria	Xanthomonadales	Xanthomonadaceae	gi|384076029|emb|HE798556.1|	Stenotrophomonas maltophilia D457 complete genome	1163399	650837	651622	786	100	0	99.62
Pcub_MSU1_v1_02918_0_1_1	1	1092	Stenotrophomonas maltophilia D457	Bacteria|Proteobacteria|Gammaproteobacteria|Xanthomonadales|Xanthomonadaceae|Stenotrophomonas|Stenotrophomonas maltophilia group|Stenotrophomonas maltophilia|Stenotrophomonas maltophilia D457	Bacteria	Proteobacteria	Gammaproteobacteria	Xanthomonadales	Xanthomonadaceae	gi|384076029|emb|HE798556.1|	Stenotrophomonas maltophilia D457 complete genome	1163399	647940	649031	1092	100	0	99.18
Pcub_MSU1_v1_02919_0_2_1	1	1461	Delftia acidovorans SPH-1	Bacteria|Proteobacteria|Betaproteobacteria|Burkholderiales|Comamonadaceae|Delftia|Delftia acidovorans|Delftia acidovorans SPH-1	Bacteria	Proteobacteria	Betaproteobacteria	Burkholderiales	Comamonadaceae	gi|160361034|gb|CP000884.1|	Delftia acidovorans SPH-1, complete genome	398578	6021711	6023171	1461	100	0	96.71
Pcub_MSU1_v1_02919_0_3_1	1	1434	Delftia sp. Cs1-4	Bacteria|Proteobacteria|Betaproteobacteria|Burkholderiales|Comamonadaceae|Delftia|Delftia sp. Cs1-4	Bacteria	Proteobacteria	Betaproteobacteria	Burkholderiales	Comamonadaceae	gi|333741867|gb|CP002735.1|	Delftia sp. Cs1-4, complete genome	742013	1342399	1340966	1434	100	0	93.03
Pcub_MSU1_v1_02930_0_1_1	1	1119	Delftia sp. Cs1-4	Bacteria|Proteobacteria|Betaproteobacteria|Burkholderiales|Comamonadaceae|Delftia|Delftia sp. Cs1-4	Bacteria	Proteobacteria	Betaproteobacteria	Burkholderiales	Comamonadaceae	gi|333741867|gb|CP002735.1|	Delftia sp. Cs1-4, complete genome	742013	3909026	3907908	1119	100	0	97.23
Pcub_MSU1_v1_02930_0_2_1	1	2112	Pantholops hodgsonii	Eukaryota|Opisthokonta|Metazoa|Eumetazoa|Bilateria|Deuterostomia|Chordata|Craniata|Vertebrata|Gnathostomata|Teleostomi|Euteleostomi|Sarcopterygii|Dipnotetrapodomorpha|Tetrapoda|Amniota|Mammalia|Theria|Eutheria|Boreoeutheria|Laurasiatheria|Cetartiodactyla|Ruminantia|Pecora|Bovidae|Antilopinae|Pantholops|Pantholops hodgsonii	Eukaryota	Opisthokonta	Metazoa	Eumetazoa	Bilateria	gi|556757425|ref|XM_005973994.1|	PREDICTED: Pantholops hodgsonii peroxisomal bifunctional enzyme-like (LOC102340846), mRNA	59538	1	2112	2112	100	0	99.1
Pcub_MSU1_v1_02935_0_0_1	1	606	Acinetobacter oleivorans DR1	Bacteria|Proteobacteria|Gammaproteobacteria|Pseudomonadales|Moraxellaceae|Acinetobacter|Acinetobacter oleivorans|Acinetobacter oleivorans DR1	Bacteria	Proteobacteria	Gammaproteobacteria	Pseudomonadales	Moraxellaceae	gi|298698338|gb|CP002080.1|	Acinetobacter oleivorans DR1, complete genome	436717	900774	900169	606	100	0	92.24
Pcub_MSU1_v1_02935_0_1_1	1	819	Acinetobacter oleivorans DR1	Bacteria|Proteobacteria|Gammaproteobacteria|Pseudomonadales|Moraxellaceae|Acinetobacter|Acinetobacter oleivorans|Acinetobacter oleivorans DR1	Bacteria	Proteobacteria	Gammaproteobacteria	Pseudomonadales	Moraxellaceae	gi|298698338|gb|CP002080.1|	Acinetobacter oleivorans DR1, complete genome	436717	901627	900808	820	100	0	96.71
Pcub_MSU1_v1_02938_0_0_1	1	2112	Delftia sp. Cs1-4	Bacteria|Proteobacteria|Betaproteobacteria|Burkholderiales|Comamonadaceae|Delftia|Delftia sp. Cs1-4	Bacteria	Proteobacteria	Betaproteobacteria	Burkholderiales	Comamonadaceae	gi|333741867|gb|CP002735.1|	Delftia sp. Cs1-4, complete genome	742013	5792073	5789974	2112	100	0	98.06
Pcub_MSU1_v1_02938_0_1_1	1	1170	Delftia acidovorans SPH-1	Bacteria|Proteobacteria|Betaproteobacteria|Burkholderiales|Comamonadaceae|Delftia|Delftia acidovorans|Delftia acidovorans SPH-1	Bacteria	Proteobacteria	Betaproteobacteria	Burkholderiales	Comamonadaceae	gi|160361034|gb|CP000884.1|	Delftia acidovorans SPH-1, complete genome	398578	1523593	1524777	1185	100	0	95.36
Pcub_MSU1_v1_02940_0_0_1	1	1581	Delftia sp. Cs1-4	Bacteria|Proteobacteria|Betaproteobacteria|Burkholderiales|Comamonadaceae|Delftia|Delftia sp. Cs1-4	Bacteria	Proteobacteria	Betaproteobacteria	Burkholderiales	Comamonadaceae	gi|333741867|gb|CP002735.1|	Delftia sp. Cs1-4, complete genome	742013	4309688	4311268	1581	100	0	97.47
Pcub_MSU1_v1_02941_0_0_1	1	888	Delftia acidovorans SPH-1	Bacteria|Proteobacteria|Betaproteobacteria|Burkholderiales|Comamonadaceae|Delftia|Delftia acidovorans|Delftia acidovorans SPH-1	Bacteria	Proteobacteria	Betaproteobacteria	Burkholderiales	Comamonadaceae	gi|160361034|gb|CP000884.1|	Delftia acidovorans SPH-1, complete genome	398578	2104287	2105174	888	100	0	98.99
Pcub_MSU1_v1_02941_0_1_1	1	2079	Delftia sp. Cs1-4	Bacteria|Proteobacteria|Betaproteobacteria|Burkholderiales|Comamonadaceae|Delftia|Delftia sp. Cs1-4	Bacteria	Proteobacteria	Betaproteobacteria	Burkholderiales	Comamonadaceae	gi|333741867|gb|CP002735.1|	Delftia sp. Cs1-4, complete genome	742013	5351375	5349297	2079	100	0	98.8
Pcub_MSU1_v1_02945_0_2_1	1	1521	Acidovorax avenae subsp. avenae ATCC 19860	Bacteria|Proteobacteria|Betaproteobacteria|Burkholderiales|Comamonadaceae|Acidovorax|Acidovorax avenae|Acidovorax avenae subsp. avenae|Acidovorax avenae subsp. avenae ATCC 19860	Bacteria	Proteobacteria	Betaproteobacteria	Burkholderiales	Comamonadaceae	gi|323371659|gb|CP002521.1|	Acidovorax avenae subsp. avenae ATCC 19860, complete genome	643561	2258361	2256841	1522	100	0	90.41
Pcub_MSU1_v1_02946_0_4_1	1	207	Delftia sp. Cs1-4	Bacteria|Proteobacteria|Betaproteobacteria|Burkholderiales|Comamonadaceae|Delftia|Delftia sp. Cs1-4	Bacteria	Proteobacteria	Betaproteobacteria	Burkholderiales	Comamonadaceae	gi|333741867|gb|CP002735.1|	Delftia sp. Cs1-4, complete genome	742013	2514833	2515039	207	100	7e-103	100
Pcub_MSU1_v1_02946_0_5_1	1	195	Delftia sp. Cs1-4	Bacteria|Proteobacteria|Betaproteobacteria|Burkholderiales|Comamonadaceae|Delftia|Delftia sp. Cs1-4	Bacteria	Proteobacteria	Betaproteobacteria	Burkholderiales	Comamonadaceae	gi|333741867|gb|CP002735.1|	Delftia sp. Cs1-4, complete genome	742013	2514612	2514806	195	100	3e-91	98.46
Pcub_MSU1_v1_02947_0_1_1	1	576	Delftia sp. Cs1-4	Bacteria|Proteobacteria|Betaproteobacteria|Burkholderiales|Comamonadaceae|Delftia|Delftia sp. Cs1-4	Bacteria	Proteobacteria	Betaproteobacteria	Burkholderiales	Comamonadaceae	gi|333741867|gb|CP002735.1|	Delftia sp. Cs1-4, complete genome	742013	6464291	6464866	576	100	0	98.61
Pcub_MSU1_v1_02947_0_2_1	1	1236	Delftia acidovorans SPH-1	Bacteria|Proteobacteria|Betaproteobacteria|Burkholderiales|Comamonadaceae|Delftia|Delftia acidovorans|Delftia acidovorans SPH-1	Bacteria	Proteobacteria	Betaproteobacteria	Burkholderiales	Comamonadaceae	gi|160361034|gb|CP000884.1|	Delftia acidovorans SPH-1, complete genome	398578	878766	880007	1242	100	0	98.39
Pcub_MSU1_v1_02957_0_0_1	1	825	Acinetobacter oleivorans DR1	Bacteria|Proteobacteria|Gammaproteobacteria|Pseudomonadales|Moraxellaceae|Acinetobacter|Acinetobacter oleivorans|Acinetobacter oleivorans DR1	Bacteria	Proteobacteria	Gammaproteobacteria	Pseudomonadales	Moraxellaceae	gi|298698338|gb|CP002080.1|	Acinetobacter oleivorans DR1, complete genome	436717	455754	456578	825	100	0	99.15
Pcub_MSU1_v1_02960_0_0_1	1	744	Acinetobacter oleivorans DR1	Bacteria|Proteobacteria|Gammaproteobacteria|Pseudomonadales|Moraxellaceae|Acinetobacter|Acinetobacter oleivorans|Acinetobacter oleivorans DR1	Bacteria	Proteobacteria	Gammaproteobacteria	Pseudomonadales	Moraxellaceae	gi|298698338|gb|CP002080.1|	Acinetobacter oleivorans DR1, complete genome	436717	2332519	2331776	744	100	0	93.68
Pcub_MSU1_v1_02970_0_0_1	1	1878	Stenotrophomonas maltophilia D457	Bacteria|Proteobacteria|Gammaproteobacteria|Xanthomonadales|Xanthomonadaceae|Stenotrophomonas|Stenotrophomonas maltophilia group|Stenotrophomonas maltophilia|Stenotrophomonas maltophilia D457	Bacteria	Proteobacteria	Gammaproteobacteria	Xanthomonadales	Xanthomonadaceae	gi|384076029|emb|HE798556.1|	Stenotrophomonas maltophilia D457 complete genome	1163399	2894929	2893052	1878	100	0	99.57
Pcub_MSU1_v1_02973_0_0_1	1	1335	Delftia sp. Cs1-4	Bacteria|Proteobacteria|Betaproteobacteria|Burkholderiales|Comamonadaceae|Delftia|Delftia sp. Cs1-4	Bacteria	Proteobacteria	Betaproteobacteria	Burkholderiales	Comamonadaceae	gi|333741867|gb|CP002735.1|	Delftia sp. Cs1-4, complete genome	742013	4209949	4208615	1335	100	0	98.35
Pcub_MSU1_v1_02974_0_0_1	1	1137	Stenotrophomonas maltophilia D457	Bacteria|Proteobacteria|Gammaproteobacteria|Xanthomonadales|Xanthomonadaceae|Stenotrophomonas|Stenotrophomonas maltophilia group|Stenotrophomonas maltophilia|Stenotrophomonas maltophilia D457	Bacteria	Proteobacteria	Gammaproteobacteria	Xanthomonadales	Xanthomonadaceae	gi|384076029|emb|HE798556.1|	Stenotrophomonas maltophilia D457 complete genome	1163399	1220638	1221774	1137	100	0	99.3
Pcub_MSU1_v1_02976_0_2_1	1	1359	Delftia sp. Cs1-4	Bacteria|Proteobacteria|Betaproteobacteria|Burkholderiales|Comamonadaceae|Delftia|Delftia sp. Cs1-4	Bacteria	Proteobacteria	Betaproteobacteria	Burkholderiales	Comamonadaceae	gi|333741867|gb|CP002735.1|	Delftia sp. Cs1-4, complete genome	742013	265785	264427	1359	100	0	98.01
Pcub_MSU1_v1_02980_0_2_1	1	759	Delftia sp. Cs1-4	Bacteria|Proteobacteria|Betaproteobacteria|Burkholderiales|Comamonadaceae|Delftia|Delftia sp. Cs1-4	Bacteria	Proteobacteria	Betaproteobacteria	Burkholderiales	Comamonadaceae	gi|333741867|gb|CP002735.1|	Delftia sp. Cs1-4, complete genome	742013	5921720	5920962	759	100	0	97.23
Pcub_MSU1_v1_02980_0_3_1	1	1038	Delftia sp. Cs1-4	Bacteria|Proteobacteria|Betaproteobacteria|Burkholderiales|Comamonadaceae|Delftia|Delftia sp. Cs1-4	Bacteria	Proteobacteria	Betaproteobacteria	Burkholderiales	Comamonadaceae	gi|333741867|gb|CP002735.1|	Delftia sp. Cs1-4, complete genome	742013	5924167	5925204	1038	100	0	93.55
Pcub_MSU1_v1_02981_0_1_1	1	660	Stenotrophomonas maltophilia	Bacteria|Proteobacteria|Gammaproteobacteria|Xanthomonadales|Xanthomonadaceae|Stenotrophomonas|Stenotrophomonas maltophilia group|Stenotrophomonas maltophilia	Bacteria	Proteobacteria	Gammaproteobacteria	Xanthomonadales	Xanthomonadaceae	gi|922679809|gb|CP011010.1|	Stenotrophomonas maltophilia strain ISMMS3, complete genome	40324	1982932	1983591	660	100	0	97.12
Pcub_MSU1_v1_02987_0_1_1	1	990	Delftia acidovorans SPH-1	Bacteria|Proteobacteria|Betaproteobacteria|Burkholderiales|Comamonadaceae|Delftia|Delftia acidovorans|Delftia acidovorans SPH-1	Bacteria	Proteobacteria	Betaproteobacteria	Burkholderiales	Comamonadaceae	gi|160361034|gb|CP000884.1|	Delftia acidovorans SPH-1, complete genome	398578	876288	875299	990	100	0	98.28
Pcub_MSU1_v1_02994_0_2_1	1	2037	Stenotrophomonas maltophilia D457	Bacteria|Proteobacteria|Gammaproteobacteria|Xanthomonadales|Xanthomonadaceae|Stenotrophomonas|Stenotrophomonas maltophilia group|Stenotrophomonas maltophilia|Stenotrophomonas maltophilia D457	Bacteria	Proteobacteria	Gammaproteobacteria	Xanthomonadales	Xanthomonadaceae	gi|384076029|emb|HE798556.1|	Stenotrophomonas maltophilia D457 complete genome	1163399	516658	514611	2048	100	0	97.12
Pcub_MSU1_v1_02999_0_0_1	1	2502	Stenotrophomonas maltophilia D457	Bacteria|Proteobacteria|Gammaproteobacteria|Xanthomonadales|Xanthomonadaceae|Stenotrophomonas|Stenotrophomonas maltophilia group|Stenotrophomonas maltophilia|Stenotrophomonas maltophilia D457	Bacteria	Proteobacteria	Gammaproteobacteria	Xanthomonadales	Xanthomonadaceae	gi|384076029|emb|HE798556.1|	Stenotrophomonas maltophilia D457 complete genome	1163399	2163353	2165854	2502	100	0	99.48
Pcub_MSU1_v1_03006_0_0_1	1	1188	Pantholops hodgsonii	Eukaryota|Opisthokonta|Metazoa|Eumetazoa|Bilateria|Deuterostomia|Chordata|Craniata|Vertebrata|Gnathostomata|Teleostomi|Euteleostomi|Sarcopterygii|Dipnotetrapodomorpha|Tetrapoda|Amniota|Mammalia|Theria|Eutheria|Boreoeutheria|Laurasiatheria|Cetartiodactyla|Ruminantia|Pecora|Bovidae|Antilopinae|Pantholops|Pantholops hodgsonii	Eukaryota	Opisthokonta	Metazoa	Eumetazoa	Bilateria	gi|556769057|ref|XM_005979677.1|	PREDICTED: Pantholops hodgsonii succinate--hydroxymethylglutarate CoA-transferase-like (LOC102334958), mRNA	59538	1	1188	1188	100	0	97.9
Pcub_MSU1_v1_03011_0_0_1	1	594	Stenotrophomonas maltophilia D457	Bacteria|Proteobacteria|Gammaproteobacteria|Xanthomonadales|Xanthomonadaceae|Stenotrophomonas|Stenotrophomonas maltophilia group|Stenotrophomonas maltophilia|Stenotrophomonas maltophilia D457	Bacteria	Proteobacteria	Gammaproteobacteria	Xanthomonadales	Xanthomonadaceae	gi|384076029|emb|HE798556.1|	Stenotrophomonas maltophilia D457 complete genome	1163399	849362	848769	594	100	0	99.33
Pcub_MSU1_v1_03011_0_1_1	1	1743	Stenotrophomonas maltophilia D457	Bacteria|Proteobacteria|Gammaproteobacteria|Xanthomonadales|Xanthomonadaceae|Stenotrophomonas|Stenotrophomonas maltophilia group|Stenotrophomonas maltophilia|Stenotrophomonas maltophilia D457	Bacteria	Proteobacteria	Gammaproteobacteria	Xanthomonadales	Xanthomonadaceae	gi|384076029|emb|HE798556.1|	Stenotrophomonas maltophilia D457 complete genome	1163399	846044	847783	1743	100	0	97.76
Pcub_MSU1_v1_03023_0_3_1	1	630	Acidovorax ebreus TPSY	Bacteria|Proteobacteria|Betaproteobacteria|Burkholderiales|Comamonadaceae|Acidovorax|Acidovorax ebreus|Acidovorax ebreus TPSY	Bacteria	Proteobacteria	Betaproteobacteria	Burkholderiales	Comamonadaceae	gi|221728669|gb|CP001392.1|	Acidovorax ebreus TPSY, complete genome	535289	1803952	1803323	630	100	0	91.59
Pcub_MSU1_v1_03030_0_4_1	1	564	Acidovorax avenae subsp. avenae ATCC 19860	Bacteria|Proteobacteria|Betaproteobacteria|Burkholderiales|Comamonadaceae|Acidovorax|Acidovorax avenae|Acidovorax avenae subsp. avenae|Acidovorax avenae subsp. avenae ATCC 19860	Bacteria	Proteobacteria	Betaproteobacteria	Burkholderiales	Comamonadaceae	gi|323371659|gb|CP002521.1|	Acidovorax avenae subsp. avenae ATCC 19860, complete genome	643561	1204402	1203839	564	100	0	92.73
Pcub_MSU1_v1_03033_0_1_1	1	1893	Stenotrophomonas maltophilia D457	Bacteria|Proteobacteria|Gammaproteobacteria|Xanthomonadales|Xanthomonadaceae|Stenotrophomonas|Stenotrophomonas maltophilia group|Stenotrophomonas maltophilia|Stenotrophomonas maltophilia D457	Bacteria	Proteobacteria	Gammaproteobacteria	Xanthomonadales	Xanthomonadaceae	gi|384076029|emb|HE798556.1|	Stenotrophomonas maltophilia D457 complete genome	1163399	3990040	3988148	1893	100	0	99.79
Pcub_MSU1_v1_03038_0_0_1	1	360	Delftia sp. Cs1-4	Bacteria|Proteobacteria|Betaproteobacteria|Burkholderiales|Comamonadaceae|Delftia|Delftia sp. Cs1-4	Bacteria	Proteobacteria	Betaproteobacteria	Burkholderiales	Comamonadaceae	gi|333741867|gb|CP002735.1|	Delftia sp. Cs1-4, complete genome	742013	4045857	4046216	360	100	3e-179	98.61
Pcub_MSU1_v1_03038_0_2_1	1	903	Delftia sp. Cs1-4	Bacteria|Proteobacteria|Betaproteobacteria|Burkholderiales|Comamonadaceae|Delftia|Delftia sp. Cs1-4	Bacteria	Proteobacteria	Betaproteobacteria	Burkholderiales	Comamonadaceae	gi|333741867|gb|CP002735.1|	Delftia sp. Cs1-4, complete genome	742013	4047149	4046247	903	100	0	99.11
Pcub_MSU1_v1_03038_0_9_1	1	2022	Delftia sp. Cs1-4	Bacteria|Proteobacteria|Betaproteobacteria|Burkholderiales|Comamonadaceae|Delftia|Delftia sp. Cs1-4	Bacteria	Proteobacteria	Betaproteobacteria	Burkholderiales	Comamonadaceae	gi|333741867|gb|CP002735.1|	Delftia sp. Cs1-4, complete genome	742013	4047325	4049346	2022	100	0	98.91
Pcub_MSU1_v1_03046_0_0_1	1	717	Acinetobacter oleivorans DR1	Bacteria|Proteobacteria|Gammaproteobacteria|Pseudomonadales|Moraxellaceae|Acinetobacter|Acinetobacter oleivorans|Acinetobacter oleivorans DR1	Bacteria	Proteobacteria	Gammaproteobacteria	Pseudomonadales	Moraxellaceae	gi|298698338|gb|CP002080.1|	Acinetobacter oleivorans DR1, complete genome	436717	2862514	2863230	717	100	0	96.79
Pcub_MSU1_v1_03055_0_1_1	1	1938	Delftia sp. Cs1-4	Bacteria|Proteobacteria|Betaproteobacteria|Burkholderiales|Comamonadaceae|Delftia|Delftia sp. Cs1-4	Bacteria	Proteobacteria	Betaproteobacteria	Burkholderiales	Comamonadaceae	gi|333741867|gb|CP002735.1|	Delftia sp. Cs1-4, complete genome	742013	5134803	5136740	1938	100	0	98.66
Pcub_MSU1_v1_03055_0_6_1	1	1434	Delftia sp. Cs1-4	Bacteria|Proteobacteria|Betaproteobacteria|Burkholderiales|Comamonadaceae|Delftia|Delftia sp. Cs1-4	Bacteria	Proteobacteria	Betaproteobacteria	Burkholderiales	Comamonadaceae	gi|333741867|gb|CP002735.1|	Delftia sp. Cs1-4, complete genome	742013	5139015	5137564	1455	100	0	91.62
Pcub_MSU1_v1_03058_0_0_1	1	717	Delftia sp. Cs1-4	Bacteria|Proteobacteria|Betaproteobacteria|Burkholderiales|Comamonadaceae|Delftia|Delftia sp. Cs1-4	Bacteria	Proteobacteria	Betaproteobacteria	Burkholderiales	Comamonadaceae	gi|333741867|gb|CP002735.1|	Delftia sp. Cs1-4, complete genome	742013	5845434	5844718	717	100	0	99.02
Pcub_MSU1_v1_03063_0_1_1	1	2406	Delftia sp. Cs1-4	Bacteria|Proteobacteria|Betaproteobacteria|Burkholderiales|Comamonadaceae|Delftia|Delftia sp. Cs1-4	Bacteria	Proteobacteria	Betaproteobacteria	Burkholderiales	Comamonadaceae	gi|333741867|gb|CP002735.1|	Delftia sp. Cs1-4, complete genome	742013	3153925	3151520	2406	100	0	93.64
Pcub_MSU1_v1_03064_0_0_1	1	2043	Cucumis sativus	Eukaryota|Viridiplantae|Streptophyta|Streptophytina|Embryophyta|Tracheophyta|Euphyllophyta|Spermatophyta|Magnoliophyta|Mesangiospermae|eudicotyledons|Gunneridae|Pentapetalae|rosids|fabids|Cucurbitales|Cucurbitaceae|Benincaseae|Cucumis|Cucumis sativus	Eukaryota	Viridiplantae	Streptophyta	Streptophytina	Embryophyta	gi|778665391|ref|XM_011650249.1|	PREDICTED: Cucumis sativus beta-galactosidase 15-like (LOC101211427), mRNA	3659	63	2124	2062	100	0	98.84
Pcub_MSU1_v1_03067_0_0_1	1	1389	Delftia sp. Cs1-4	Bacteria|Proteobacteria|Betaproteobacteria|Burkholderiales|Comamonadaceae|Delftia|Delftia sp. Cs1-4	Bacteria	Proteobacteria	Betaproteobacteria	Burkholderiales	Comamonadaceae	gi|333741867|gb|CP002735.1|	Delftia sp. Cs1-4, complete genome	742013	4064950	4063562	1389	100	0	98.49
Pcub_MSU1_v1_03068_0_0_1	1	417	Pseudomonas putida BIRD-1	Bacteria|Proteobacteria|Gammaproteobacteria|Pseudomonadales|Pseudomonadaceae|Pseudomonas|Pseudomonas putida group|Pseudomonas putida|Pseudomonas putida BIRD-1	Bacteria	Proteobacteria	Gammaproteobacteria	Pseudomonadales	Pseudomonadaceae	gi|313496345|gb|CP002290.1|	Pseudomonas putida BIRD-1, complete genome	931281	57153	57569	417	100	0	97.12
Pcub_MSU1_v1_03080_0_1_1	1	579	Delftia sp. Cs1-4	Bacteria|Proteobacteria|Betaproteobacteria|Burkholderiales|Comamonadaceae|Delftia|Delftia sp. Cs1-4	Bacteria	Proteobacteria	Betaproteobacteria	Burkholderiales	Comamonadaceae	gi|333741867|gb|CP002735.1|	Delftia sp. Cs1-4, complete genome	742013	1409379	1409957	579	100	0	96.72
Pcub_MSU1_v1_03085_0_1_1	1	1989	Acinetobacter oleivorans DR1	Bacteria|Proteobacteria|Gammaproteobacteria|Pseudomonadales|Moraxellaceae|Acinetobacter|Acinetobacter oleivorans|Acinetobacter oleivorans DR1	Bacteria	Proteobacteria	Gammaproteobacteria	Pseudomonadales	Moraxellaceae	gi|298698338|gb|CP002080.1|	Acinetobacter oleivorans DR1, complete genome	436717	3753141	3751153	1989	100	0	94.82
Pcub_MSU1_v1_03085_0_2_1	1	270	Acinetobacter oleivorans DR1	Bacteria|Proteobacteria|Gammaproteobacteria|Pseudomonadales|Moraxellaceae|Acinetobacter|Acinetobacter oleivorans|Acinetobacter oleivorans DR1	Bacteria	Proteobacteria	Gammaproteobacteria	Pseudomonadales	Moraxellaceae	gi|298698338|gb|CP002080.1|	Acinetobacter oleivorans DR1, complete genome	436717	3753768	3753499	270	100	9e-133	98.89
Pcub_MSU1_v1_03087_0_4_1	1	1497	Stenotrophomonas maltophilia D457	Bacteria|Proteobacteria|Gammaproteobacteria|Xanthomonadales|Xanthomonadaceae|Stenotrophomonas|Stenotrophomonas maltophilia group|Stenotrophomonas maltophilia|Stenotrophomonas maltophilia D457	Bacteria	Proteobacteria	Gammaproteobacteria	Xanthomonadales	Xanthomonadaceae	gi|384076029|emb|HE798556.1|	Stenotrophomonas maltophilia D457 complete genome	1163399	4559608	4558112	1497	100	0	99.47
Pcub_MSU1_v1_03088_0_2_1	1	1629	Stenotrophomonas maltophilia D457	Bacteria|Proteobacteria|Gammaproteobacteria|Xanthomonadales|Xanthomonadaceae|Stenotrophomonas|Stenotrophomonas maltophilia group|Stenotrophomonas maltophilia|Stenotrophomonas maltophilia D457	Bacteria	Proteobacteria	Gammaproteobacteria	Xanthomonadales	Xanthomonadaceae	gi|384076029|emb|HE798556.1|	Stenotrophomonas maltophilia D457 complete genome	1163399	4290965	4289337	1629	100	0	99.39
Pcub_MSU1_v1_03113_0_1_1	1	3156	Delftia sp. Cs1-4	Bacteria|Proteobacteria|Betaproteobacteria|Burkholderiales|Comamonadaceae|Delftia|Delftia sp. Cs1-4	Bacteria	Proteobacteria	Betaproteobacteria	Burkholderiales	Comamonadaceae	gi|333741867|gb|CP002735.1|	Delftia sp. Cs1-4, complete genome	742013	844746	847901	3156	100	0	98.7
Pcub_MSU1_v1_03119_0_1_1	1	1401	Delftia acidovorans SPH-1	Bacteria|Proteobacteria|Betaproteobacteria|Burkholderiales|Comamonadaceae|Delftia|Delftia acidovorans|Delftia acidovorans SPH-1	Bacteria	Proteobacteria	Betaproteobacteria	Burkholderiales	Comamonadaceae	gi|160361034|gb|CP000884.1|	Delftia acidovorans SPH-1, complete genome	398578	4917608	4916208	1401	100	0	98.29
Pcub_MSU1_v1_03123_0_1_1	1	993	Pantholops hodgsonii	Eukaryota|Opisthokonta|Metazoa|Eumetazoa|Bilateria|Deuterostomia|Chordata|Craniata|Vertebrata|Gnathostomata|Teleostomi|Euteleostomi|Sarcopterygii|Dipnotetrapodomorpha|Tetrapoda|Amniota|Mammalia|Theria|Eutheria|Boreoeutheria|Laurasiatheria|Cetartiodactyla|Ruminantia|Pecora|Bovidae|Antilopinae|Pantholops|Pantholops hodgsonii	Eukaryota	Opisthokonta	Metazoa	Eumetazoa	Bilateria	gi|556763536|ref|XM_005976989.1|	PREDICTED: Pantholops hodgsonii cysteine synthase, chloroplastic/chromoplastic-like (LOC102328742), mRNA	59538	1	993	993	100	0	98.59
Pcub_MSU1_v1_03123_0_2_1	1	1755	Delftia acidovorans SPH-1	Bacteria|Proteobacteria|Betaproteobacteria|Burkholderiales|Comamonadaceae|Delftia|Delftia acidovorans|Delftia acidovorans SPH-1	Bacteria	Proteobacteria	Betaproteobacteria	Burkholderiales	Comamonadaceae	gi|160361034|gb|CP000884.1|	Delftia acidovorans SPH-1, complete genome	398578	1611603	1609849	1756	100	0	96.98
Pcub_MSU1_v1_03129_0_0_1	1	666	Stenotrophomonas maltophilia D457	Bacteria|Proteobacteria|Gammaproteobacteria|Xanthomonadales|Xanthomonadaceae|Stenotrophomonas|Stenotrophomonas maltophilia group|Stenotrophomonas maltophilia|Stenotrophomonas maltophilia D457	Bacteria	Proteobacteria	Gammaproteobacteria	Xanthomonadales	Xanthomonadaceae	gi|384076029|emb|HE798556.1|	Stenotrophomonas maltophilia D457 complete genome	1163399	2582358	2581693	666	100	0	99.7
Pcub_MSU1_v1_03129_0_2_1	1	1392	Stenotrophomonas maltophilia D457	Bacteria|Proteobacteria|Gammaproteobacteria|Xanthomonadales|Xanthomonadaceae|Stenotrophomonas|Stenotrophomonas maltophilia group|Stenotrophomonas maltophilia|Stenotrophomonas maltophilia D457	Bacteria	Proteobacteria	Gammaproteobacteria	Xanthomonadales	Xanthomonadaceae	gi|384076029|emb|HE798556.1|	Stenotrophomonas maltophilia D457 complete genome	1163399	2579350	2580741	1392	100	0	98.64
Pcub_MSU1_v1_03131_0_0_1	1	1695	Stenotrophomonas maltophilia D457	Bacteria|Proteobacteria|Gammaproteobacteria|Xanthomonadales|Xanthomonadaceae|Stenotrophomonas|Stenotrophomonas maltophilia group|Stenotrophomonas maltophilia|Stenotrophomonas maltophilia D457	Bacteria	Proteobacteria	Gammaproteobacteria	Xanthomonadales	Xanthomonadaceae	gi|384076029|emb|HE798556.1|	Stenotrophomonas maltophilia D457 complete genome	1163399	1381803	1383497	1695	100	0	94.34
Pcub_MSU1_v1_03134_0_1_1	1	756	Pseudomonas putida S12	Bacteria|Proteobacteria|Gammaproteobacteria|Pseudomonadales|Pseudomonadaceae|Pseudomonas|Pseudomonas putida group|Pseudomonas putida|Pseudomonas putida S12	Bacteria	Proteobacteria	Gammaproteobacteria	Pseudomonadales	Pseudomonadaceae	gi|734574563|gb|CP009974.1|	Pseudomonas putida S12, complete genome	1215087	3012443	3013198	756	100	0	100
Pcub_MSU1_v1_03141_0_0_1	1	1422	Stenotrophomonas maltophilia D457	Bacteria|Proteobacteria|Gammaproteobacteria|Xanthomonadales|Xanthomonadaceae|Stenotrophomonas|Stenotrophomonas maltophilia group|Stenotrophomonas maltophilia|Stenotrophomonas maltophilia D457	Bacteria	Proteobacteria	Gammaproteobacteria	Xanthomonadales	Xanthomonadaceae	gi|384076029|emb|HE798556.1|	Stenotrophomonas maltophilia D457 complete genome	1163399	1129820	1128399	1422	100	0	99.51
Pcub_MSU1_v1_03148_0_2_1	1	1101	Stenotrophomonas maltophilia D457	Bacteria|Proteobacteria|Gammaproteobacteria|Xanthomonadales|Xanthomonadaceae|Stenotrophomonas|Stenotrophomonas maltophilia group|Stenotrophomonas maltophilia|Stenotrophomonas maltophilia D457	Bacteria	Proteobacteria	Gammaproteobacteria	Xanthomonadales	Xanthomonadaceae	gi|384076029|emb|HE798556.1|	Stenotrophomonas maltophilia D457 complete genome	1163399	3448619	3449719	1101	100	0	97.64
Pcub_MSU1_v1_03149_0_0_1	1	1890	Delftia acidovorans SPH-1	Bacteria|Proteobacteria|Betaproteobacteria|Burkholderiales|Comamonadaceae|Delftia|Delftia acidovorans|Delftia acidovorans SPH-1	Bacteria	Proteobacteria	Betaproteobacteria	Burkholderiales	Comamonadaceae	gi|160361034|gb|CP000884.1|	Delftia acidovorans SPH-1, complete genome	398578	2752669	2750783	1890	100	0	95.08
Pcub_MSU1_v1_03151_0_0_1	1	648	Acinetobacter oleivorans DR1	Bacteria|Proteobacteria|Gammaproteobacteria|Pseudomonadales|Moraxellaceae|Acinetobacter|Acinetobacter oleivorans|Acinetobacter oleivorans DR1	Bacteria	Proteobacteria	Gammaproteobacteria	Pseudomonadales	Moraxellaceae	gi|298698338|gb|CP002080.1|	Acinetobacter oleivorans DR1, complete genome	436717	1000743	1001390	648	100	0	97.53
Pcub_MSU1_v1_03151_0_1_1	1	1029	Acinetobacter oleivorans DR1	Bacteria|Proteobacteria|Gammaproteobacteria|Pseudomonadales|Moraxellaceae|Acinetobacter|Acinetobacter oleivorans|Acinetobacter oleivorans DR1	Bacteria	Proteobacteria	Gammaproteobacteria	Pseudomonadales	Moraxellaceae	gi|298698338|gb|CP002080.1|	Acinetobacter oleivorans DR1, complete genome	436717	1001397	1002425	1029	100	0	95.14
Pcub_MSU1_v1_03160_0_0_1	1	1395	Delftia acidovorans SPH-1	Bacteria|Proteobacteria|Betaproteobacteria|Burkholderiales|Comamonadaceae|Delftia|Delftia acidovorans|Delftia acidovorans SPH-1	Bacteria	Proteobacteria	Betaproteobacteria	Burkholderiales	Comamonadaceae	gi|160361034|gb|CP000884.1|	Delftia acidovorans SPH-1, complete genome	398578	1694561	1695955	1395	100	0	97.13
Pcub_MSU1_v1_03166_0_0_1	1	2100	Stenotrophomonas maltophilia D457	Bacteria|Proteobacteria|Gammaproteobacteria|Xanthomonadales|Xanthomonadaceae|Stenotrophomonas|Stenotrophomonas maltophilia group|Stenotrophomonas maltophilia|Stenotrophomonas maltophilia D457	Bacteria	Proteobacteria	Gammaproteobacteria	Xanthomonadales	Xanthomonadaceae	gi|384076029|emb|HE798556.1|	Stenotrophomonas maltophilia D457 complete genome	1163399	3616820	3618919	2100	100	0	99.62
Pcub_MSU1_v1_03170_0_1_1	1	654	Delftia sp. Cs1-4	Bacteria|Proteobacteria|Betaproteobacteria|Burkholderiales|Comamonadaceae|Delftia|Delftia sp. Cs1-4	Bacteria	Proteobacteria	Betaproteobacteria	Burkholderiales	Comamonadaceae	gi|333741867|gb|CP002735.1|	Delftia sp. Cs1-4, complete genome	742013	4445189	4445842	654	100	0	96.18
Pcub_MSU1_v1_03170_0_4_1	1	744	Delftia sp. Cs1-4	Bacteria|Proteobacteria|Betaproteobacteria|Burkholderiales|Comamonadaceae|Delftia|Delftia sp. Cs1-4	Bacteria	Proteobacteria	Betaproteobacteria	Burkholderiales	Comamonadaceae	gi|333741867|gb|CP002735.1|	Delftia sp. Cs1-4, complete genome	742013	4442790	4442047	744	100	0	93.68
Pcub_MSU1_v1_03174_0_0_1	1	1002	Delftia sp. Cs1-4	Bacteria|Proteobacteria|Betaproteobacteria|Burkholderiales|Comamonadaceae|Delftia|Delftia sp. Cs1-4	Bacteria	Proteobacteria	Betaproteobacteria	Burkholderiales	Comamonadaceae	gi|333741867|gb|CP002735.1|	Delftia sp. Cs1-4, complete genome	742013	2539758	2540759	1002	100	0	97.31
Pcub_MSU1_v1_03175_0_1_1	1	489	Stenotrophomonas maltophilia R551-3	Bacteria|Proteobacteria|Gammaproteobacteria|Xanthomonadales|Xanthomonadaceae|Stenotrophomonas|Stenotrophomonas maltophilia group|Stenotrophomonas maltophilia|Stenotrophomonas maltophilia R551-3	Bacteria	Proteobacteria	Gammaproteobacteria	Xanthomonadales	Xanthomonadaceae	gi|194346582|gb|CP001111.1|	Stenotrophomonas maltophilia R551-3, complete genome	391008	79500	79012	489	100	0	94.07
Pcub_MSU1_v1_03175_0_2_1	1	1107	Stenotrophomonas maltophilia D457	Bacteria|Proteobacteria|Gammaproteobacteria|Xanthomonadales|Xanthomonadaceae|Stenotrophomonas|Stenotrophomonas maltophilia group|Stenotrophomonas maltophilia|Stenotrophomonas maltophilia D457	Bacteria	Proteobacteria	Gammaproteobacteria	Xanthomonadales	Xanthomonadaceae	gi|384076029|emb|HE798556.1|	Stenotrophomonas maltophilia D457 complete genome	1163399	87513	88619	1107	100	0	96.39
Pcub_MSU1_v1_03183_0_1_1	1	1452	Acidovorax avenae subsp. avenae ATCC 19860	Bacteria|Proteobacteria|Betaproteobacteria|Burkholderiales|Comamonadaceae|Acidovorax|Acidovorax avenae|Acidovorax avenae subsp. avenae|Acidovorax avenae subsp. avenae ATCC 19860	Bacteria	Proteobacteria	Betaproteobacteria	Burkholderiales	Comamonadaceae	gi|323371659|gb|CP002521.1|	Acidovorax avenae subsp. avenae ATCC 19860, complete genome	643561	1420154	1421605	1452	100	0	95.32
Pcub_MSU1_v1_03193_0_1_1	1	699	Delftia sp. Cs1-4	Bacteria|Proteobacteria|Betaproteobacteria|Burkholderiales|Comamonadaceae|Delftia|Delftia sp. Cs1-4	Bacteria	Proteobacteria	Betaproteobacteria	Burkholderiales	Comamonadaceae	gi|333741867|gb|CP002735.1|	Delftia sp. Cs1-4, complete genome	742013	4314232	4314930	699	100	0	96.14
Pcub_MSU1_v1_03196_0_0_1	1	1347	Delftia sp. Cs1-4	Bacteria|Proteobacteria|Betaproteobacteria|Burkholderiales|Comamonadaceae|Delftia|Delftia sp. Cs1-4	Bacteria	Proteobacteria	Betaproteobacteria	Burkholderiales	Comamonadaceae	gi|333741867|gb|CP002735.1|	Delftia sp. Cs1-4, complete genome	742013	6513324	6511978	1347	100	0	99.33
Pcub_MSU1_v1_03201_0_0_1	1	1293	Pantholops hodgsonii	Eukaryota|Opisthokonta|Metazoa|Eumetazoa|Bilateria|Deuterostomia|Chordata|Craniata|Vertebrata|Gnathostomata|Teleostomi|Euteleostomi|Sarcopterygii|Dipnotetrapodomorpha|Tetrapoda|Amniota|Mammalia|Theria|Eutheria|Boreoeutheria|Laurasiatheria|Cetartiodactyla|Ruminantia|Pecora|Bovidae|Antilopinae|Pantholops|Pantholops hodgsonii	Eukaryota	Opisthokonta	Metazoa	Eumetazoa	Bilateria	gi|556757793|ref|XM_005974172.1|	PREDICTED: Pantholops hodgsonii catalase-B-like (LOC102324668), mRNA	59538	1	1293	1293	100	0	98.76
Pcub_MSU1_v1_03207_0_0_1	1	2532	Stenotrophomonas maltophilia D457	Bacteria|Proteobacteria|Gammaproteobacteria|Xanthomonadales|Xanthomonadaceae|Stenotrophomonas|Stenotrophomonas maltophilia group|Stenotrophomonas maltophilia|Stenotrophomonas maltophilia D457	Bacteria	Proteobacteria	Gammaproteobacteria	Xanthomonadales	Xanthomonadaceae	gi|384076029|emb|HE798556.1|	Stenotrophomonas maltophilia D457 complete genome	1163399	4172172	4169641	2532	100	0	98.1
Pcub_MSU1_v1_03211_0_0_1	1	1869	Xanthomonas citri subsp. citri	Bacteria|Proteobacteria|Gammaproteobacteria|Xanthomonadales|Xanthomonadaceae|Xanthomonas|Xanthomonas citri group|Xanthomonas citri|Xanthomonas citri subsp. citri	Bacteria	Proteobacteria	Gammaproteobacteria	Xanthomonadales	Xanthomonadaceae	gi|313585025|gb|HM362782.1|	Xanthomonas citri subsp. citri strain A44 hypothetical transcriptional repressor, CopL (copL), CopA (copA), CopB (copB), CopM (copM), transposase, CopG (copG), hypothetical protein, CopC (copC), CopD (copD), and CopF (copF) genes, complete cds	611301	1035	2906	1872	100	0	96.96
Pcub_MSU1_v1_03216_0_0_1	1	654	Delftia acidovorans SPH-1	Bacteria|Proteobacteria|Betaproteobacteria|Burkholderiales|Comamonadaceae|Delftia|Delftia acidovorans|Delftia acidovorans SPH-1	Bacteria	Proteobacteria	Betaproteobacteria	Burkholderiales	Comamonadaceae	gi|160361034|gb|CP000884.1|	Delftia acidovorans SPH-1, complete genome	398578	5802789	5803442	654	100	0	96.64
Pcub_MSU1_v1_03218_0_1_1	1	792	Delftia sp. Cs1-4	Bacteria|Proteobacteria|Betaproteobacteria|Burkholderiales|Comamonadaceae|Delftia|Delftia sp. Cs1-4	Bacteria	Proteobacteria	Betaproteobacteria	Burkholderiales	Comamonadaceae	gi|333741867|gb|CP002735.1|	Delftia sp. Cs1-4, complete genome	742013	5509579	5508777	804	100	0	95.27
Pcub_MSU1_v1_03226_0_7_1	1	684	Stenotrophomonas maltophilia D457	Bacteria|Proteobacteria|Gammaproteobacteria|Xanthomonadales|Xanthomonadaceae|Stenotrophomonas|Stenotrophomonas maltophilia group|Stenotrophomonas maltophilia|Stenotrophomonas maltophilia D457	Bacteria	Proteobacteria	Gammaproteobacteria	Xanthomonadales	Xanthomonadaceae	gi|384076029|emb|HE798556.1|	Stenotrophomonas maltophilia D457 complete genome	1163399	1120366	1119683	684	100	0	99.27
Pcub_MSU1_v1_03235_0_0_1	1	1290	Delftia sp. Cs1-4	Bacteria|Proteobacteria|Betaproteobacteria|Burkholderiales|Comamonadaceae|Delftia|Delftia sp. Cs1-4	Bacteria	Proteobacteria	Betaproteobacteria	Burkholderiales	Comamonadaceae	gi|333741867|gb|CP002735.1|	Delftia sp. Cs1-4, complete genome	742013	4820126	4818837	1290	100	0	97.6
Pcub_MSU1_v1_03235_0_2_1	1	906	Delftia sp. Cs1-4	Bacteria|Proteobacteria|Betaproteobacteria|Burkholderiales|Comamonadaceae|Delftia|Delftia sp. Cs1-4	Bacteria	Proteobacteria	Betaproteobacteria	Burkholderiales	Comamonadaceae	gi|333741867|gb|CP002735.1|	Delftia sp. Cs1-4, complete genome	742013	4821951	4821046	906	100	0	96.91
Pcub_MSU1_v1_03238_0_0_1	1	1098	Stenotrophomonas maltophilia D457	Bacteria|Proteobacteria|Gammaproteobacteria|Xanthomonadales|Xanthomonadaceae|Stenotrophomonas|Stenotrophomonas maltophilia group|Stenotrophomonas maltophilia|Stenotrophomonas maltophilia D457	Bacteria	Proteobacteria	Gammaproteobacteria	Xanthomonadales	Xanthomonadaceae	gi|384076029|emb|HE798556.1|	Stenotrophomonas maltophilia D457 complete genome	1163399	201482	200387	1098	100	0	99.18
Pcub_MSU1_v1_03238_0_1_1	1	2190	Stenotrophomonas maltophilia D457	Bacteria|Proteobacteria|Gammaproteobacteria|Xanthomonadales|Xanthomonadaceae|Stenotrophomonas|Stenotrophomonas maltophilia group|Stenotrophomonas maltophilia|Stenotrophomonas maltophilia D457	Bacteria	Proteobacteria	Gammaproteobacteria	Xanthomonadales	Xanthomonadaceae	gi|384076029|emb|HE798556.1|	Stenotrophomonas maltophilia D457 complete genome	1163399	200120	197931	2190	100	0	97.21
Pcub_MSU1_v1_03245_0_0_1	1	1611	Stenotrophomonas maltophilia D457	Bacteria|Proteobacteria|Gammaproteobacteria|Xanthomonadales|Xanthomonadaceae|Stenotrophomonas|Stenotrophomonas maltophilia group|Stenotrophomonas maltophilia|Stenotrophomonas maltophilia D457	Bacteria	Proteobacteria	Gammaproteobacteria	Xanthomonadales	Xanthomonadaceae	gi|384076029|emb|HE798556.1|	Stenotrophomonas maltophilia D457 complete genome	1163399	877625	876015	1611	100	0	97.45
Pcub_MSU1_v1_03253_0_1_1	1	738	Stenotrophomonas maltophilia D457	Bacteria|Proteobacteria|Gammaproteobacteria|Xanthomonadales|Xanthomonadaceae|Stenotrophomonas|Stenotrophomonas maltophilia group|Stenotrophomonas maltophilia|Stenotrophomonas maltophilia D457	Bacteria	Proteobacteria	Gammaproteobacteria	Xanthomonadales	Xanthomonadaceae	gi|384076029|emb|HE798556.1|	Stenotrophomonas maltophilia D457 complete genome	1163399	536161	535424	738	100	0	98.24
Pcub_MSU1_v1_03255_0_0_1	1	2826	Stenotrophomonas maltophilia D457	Bacteria|Proteobacteria|Gammaproteobacteria|Xanthomonadales|Xanthomonadaceae|Stenotrophomonas|Stenotrophomonas maltophilia group|Stenotrophomonas maltophilia|Stenotrophomonas maltophilia D457	Bacteria	Proteobacteria	Gammaproteobacteria	Xanthomonadales	Xanthomonadaceae	gi|384076029|emb|HE798556.1|	Stenotrophomonas maltophilia D457 complete genome	1163399	341701	338876	2826	100	0	99.47
Pcub_MSU1_v1_03259_0_1_1	1	2775	Stenotrophomonas maltophilia D457	Bacteria|Proteobacteria|Gammaproteobacteria|Xanthomonadales|Xanthomonadaceae|Stenotrophomonas|Stenotrophomonas maltophilia group|Stenotrophomonas maltophilia|Stenotrophomonas maltophilia D457	Bacteria	Proteobacteria	Gammaproteobacteria	Xanthomonadales	Xanthomonadaceae	gi|384076029|emb|HE798556.1|	Stenotrophomonas maltophilia D457 complete genome	1163399	4629771	4626997	2775	100	0	99.1
Pcub_MSU1_v1_03261_0_1_1	1	1833	Delftia acidovorans SPH-1	Bacteria|Proteobacteria|Betaproteobacteria|Burkholderiales|Comamonadaceae|Delftia|Delftia acidovorans|Delftia acidovorans SPH-1	Bacteria	Proteobacteria	Betaproteobacteria	Burkholderiales	Comamonadaceae	gi|160361034|gb|CP000884.1|	Delftia acidovorans SPH-1, complete genome	398578	3428150	3429982	1834	100	0	95.53
Pcub_MSU1_v1_03262_0_1_1	1	702	Pantholops hodgsonii	Eukaryota|Opisthokonta|Metazoa|Eumetazoa|Bilateria|Deuterostomia|Chordata|Craniata|Vertebrata|Gnathostomata|Teleostomi|Euteleostomi|Sarcopterygii|Dipnotetrapodomorpha|Tetrapoda|Amniota|Mammalia|Theria|Eutheria|Boreoeutheria|Laurasiatheria|Cetartiodactyla|Ruminantia|Pecora|Bovidae|Antilopinae|Pantholops|Pantholops hodgsonii	Eukaryota	Opisthokonta	Metazoa	Eumetazoa	Bilateria	gi|556758046|ref|XM_005974298.1|	PREDICTED: Pantholops hodgsonii probable transcriptional regulatory protein HAH1-like (LOC102316817), mRNA	59538	1	702	702	100	0	99.86
Pcub_MSU1_v1_03266_0_0_1	1	2004	Stenotrophomonas maltophilia	Bacteria|Proteobacteria|Gammaproteobacteria|Xanthomonadales|Xanthomonadaceae|Stenotrophomonas|Stenotrophomonas maltophilia group|Stenotrophomonas maltophilia	Bacteria	Proteobacteria	Gammaproteobacteria	Xanthomonadales	Xanthomonadaceae	gi|922679809|gb|CP011010.1|	Stenotrophomonas maltophilia strain ISMMS3, complete genome	40324	3197785	3195779	2011	100	0	91.65
Pcub_MSU1_v1_03266_0_1_1	1	1605	Stenotrophomonas maltophilia D457	Bacteria|Proteobacteria|Gammaproteobacteria|Xanthomonadales|Xanthomonadaceae|Stenotrophomonas|Stenotrophomonas maltophilia group|Stenotrophomonas maltophilia|Stenotrophomonas maltophilia D457	Bacteria	Proteobacteria	Gammaproteobacteria	Xanthomonadales	Xanthomonadaceae	gi|384076029|emb|HE798556.1|	Stenotrophomonas maltophilia D457 complete genome	1163399	3149934	3148330	1605	100	0	97.94
Pcub_MSU1_v1_03270_0_1_1	1	510	Pantholops hodgsonii	Eukaryota|Opisthokonta|Metazoa|Eumetazoa|Bilateria|Deuterostomia|Chordata|Craniata|Vertebrata|Gnathostomata|Teleostomi|Euteleostomi|Sarcopterygii|Dipnotetrapodomorpha|Tetrapoda|Amniota|Mammalia|Theria|Eutheria|Boreoeutheria|Laurasiatheria|Cetartiodactyla|Ruminantia|Pecora|Bovidae|Antilopinae|Pantholops|Pantholops hodgsonii	Eukaryota	Opisthokonta	Metazoa	Eumetazoa	Bilateria	gi|556758119|ref|XM_005974333.1|	PREDICTED: Pantholops hodgsonii uncharacterized LOC102330993 (LOC102330993), mRNA	59538	424	933	510	100	0	99.41
Pcub_MSU1_v1_03270_0_2_1	1	999	Delftia sp. Cs1-4	Bacteria|Proteobacteria|Betaproteobacteria|Burkholderiales|Comamonadaceae|Delftia|Delftia sp. Cs1-4	Bacteria	Proteobacteria	Betaproteobacteria	Burkholderiales	Comamonadaceae	gi|333741867|gb|CP002735.1|	Delftia sp. Cs1-4, complete genome	742013	288809	289807	999	100	0	97.4
Pcub_MSU1_v1_03270_0_3_1	1	1536	Delftia sp. Cs1-4	Bacteria|Proteobacteria|Betaproteobacteria|Burkholderiales|Comamonadaceae|Delftia|Delftia sp. Cs1-4	Bacteria	Proteobacteria	Betaproteobacteria	Burkholderiales	Comamonadaceae	gi|333741867|gb|CP002735.1|	Delftia sp. Cs1-4, complete genome	742013	290011	291546	1536	100	0	98.5
Pcub_MSU1_v1_03280_0_0_1	1	243	Stenotrophomonas maltophilia D457	Bacteria|Proteobacteria|Gammaproteobacteria|Xanthomonadales|Xanthomonadaceae|Stenotrophomonas|Stenotrophomonas maltophilia group|Stenotrophomonas maltophilia|Stenotrophomonas maltophilia D457	Bacteria	Proteobacteria	Gammaproteobacteria	Xanthomonadales	Xanthomonadaceae	gi|384076029|emb|HE798556.1|	Stenotrophomonas maltophilia D457 complete genome	1163399	3903241	3903483	243	100	8e-118	98.77
Pcub_MSU1_v1_03284_0_0_1	1	894	Acinetobacter oleivorans DR1	Bacteria|Proteobacteria|Gammaproteobacteria|Pseudomonadales|Moraxellaceae|Acinetobacter|Acinetobacter oleivorans|Acinetobacter oleivorans DR1	Bacteria	Proteobacteria	Gammaproteobacteria	Pseudomonadales	Moraxellaceae	gi|298698338|gb|CP002080.1|	Acinetobacter oleivorans DR1, complete genome	436717	66349	65456	894	100	0	95.75
Pcub_MSU1_v1_03296_0_0_1	1	1026	Stenotrophomonas maltophilia D457	Bacteria|Proteobacteria|Gammaproteobacteria|Xanthomonadales|Xanthomonadaceae|Stenotrophomonas|Stenotrophomonas maltophilia group|Stenotrophomonas maltophilia|Stenotrophomonas maltophilia D457	Bacteria	Proteobacteria	Gammaproteobacteria	Xanthomonadales	Xanthomonadaceae	gi|384076029|emb|HE798556.1|	Stenotrophomonas maltophilia D457 complete genome	1163399	155281	156306	1026	100	0	98.25
Pcub_MSU1_v1_03307_0_0_1	1	1002	Pantholops hodgsonii	Eukaryota|Opisthokonta|Metazoa|Eumetazoa|Bilateria|Deuterostomia|Chordata|Craniata|Vertebrata|Gnathostomata|Teleostomi|Euteleostomi|Sarcopterygii|Dipnotetrapodomorpha|Tetrapoda|Amniota|Mammalia|Theria|Eutheria|Boreoeutheria|Laurasiatheria|Cetartiodactyla|Ruminantia|Pecora|Bovidae|Antilopinae|Pantholops|Pantholops hodgsonii	Eukaryota	Opisthokonta	Metazoa	Eumetazoa	Bilateria	gi|556763731|ref|XM_005977085.1|	PREDICTED: Pantholops hodgsonii probable arabinose 5-phosphate isomerase-like (LOC102335053), mRNA	59538	100	1095	1002	100	0	98.6
Pcub_MSU1_v1_03310_0_2_1	1	1422	Delftia acidovorans SPH-1	Bacteria|Proteobacteria|Betaproteobacteria|Burkholderiales|Comamonadaceae|Delftia|Delftia acidovorans|Delftia acidovorans SPH-1	Bacteria	Proteobacteria	Betaproteobacteria	Burkholderiales	Comamonadaceae	gi|160361034|gb|CP000884.1|	Delftia acidovorans SPH-1, complete genome	398578	3148195	3146777	1422	100	0	95.01
Pcub_MSU1_v1_03310_0_4_1	1	528	Delftia sp. Cs1-4	Bacteria|Proteobacteria|Betaproteobacteria|Burkholderiales|Comamonadaceae|Delftia|Delftia sp. Cs1-4	Bacteria	Proteobacteria	Betaproteobacteria	Burkholderiales	Comamonadaceae	gi|333741867|gb|CP002735.1|	Delftia sp. Cs1-4, complete genome	742013	4378567	4378040	528	100	0	97.73
Pcub_MSU1_v1_03314_0_12_1	1	639	Delftia sp. Cs1-4	Bacteria|Proteobacteria|Betaproteobacteria|Burkholderiales|Comamonadaceae|Delftia|Delftia sp. Cs1-4	Bacteria	Proteobacteria	Betaproteobacteria	Burkholderiales	Comamonadaceae	gi|333741867|gb|CP002735.1|	Delftia sp. Cs1-4, complete genome	742013	704373	705011	639	100	0	99.37
Pcub_MSU1_v1_03316_0_1_1	1	1071	Delftia sp. Cs1-4	Bacteria|Proteobacteria|Betaproteobacteria|Burkholderiales|Comamonadaceae|Delftia|Delftia sp. Cs1-4	Bacteria	Proteobacteria	Betaproteobacteria	Burkholderiales	Comamonadaceae	gi|333741867|gb|CP002735.1|	Delftia sp. Cs1-4, complete genome	742013	5899281	5898211	1072	100	0	96.08
Pcub_MSU1_v1_03320_0_1_1	1	300	Delftia sp. Cs1-4	Bacteria|Proteobacteria|Betaproteobacteria|Burkholderiales|Comamonadaceae|Delftia|Delftia sp. Cs1-4	Bacteria	Proteobacteria	Betaproteobacteria	Burkholderiales	Comamonadaceae	gi|333741867|gb|CP002735.1|	Delftia sp. Cs1-4, complete genome	742013	2942522	2942821	300	100	5e-146	98.33
Pcub_MSU1_v1_03320_0_3_1	1	2022	Delftia acidovorans SPH-1	Bacteria|Proteobacteria|Betaproteobacteria|Burkholderiales|Comamonadaceae|Delftia|Delftia acidovorans|Delftia acidovorans SPH-1	Bacteria	Proteobacteria	Betaproteobacteria	Burkholderiales	Comamonadaceae	gi|160361034|gb|CP000884.1|	Delftia acidovorans SPH-1, complete genome	398578	4675543	4673522	2022	100	0	98.42
Pcub_MSU1_v1_03320_0_4_1	1	441	Delftia sp. Cs1-4	Bacteria|Proteobacteria|Betaproteobacteria|Burkholderiales|Comamonadaceae|Delftia|Delftia sp. Cs1-4	Bacteria	Proteobacteria	Betaproteobacteria	Burkholderiales	Comamonadaceae	gi|333741867|gb|CP002735.1|	Delftia sp. Cs1-4, complete genome	742013	2945649	2946089	441	100	0	98.41
Pcub_MSU1_v1_03321_0_0_1	1	843	Delftia acidovorans SPH-1	Bacteria|Proteobacteria|Betaproteobacteria|Burkholderiales|Comamonadaceae|Delftia|Delftia acidovorans|Delftia acidovorans SPH-1	Bacteria	Proteobacteria	Betaproteobacteria	Burkholderiales	Comamonadaceae	gi|160361034|gb|CP000884.1|	Delftia acidovorans SPH-1, complete genome	398578	1267932	1268774	843	100	0	99.29
Pcub_MSU1_v1_03325_0_0_1	1	540	Enterobacter cloacae	Bacteria|Proteobacteria|Gammaproteobacteria|Enterobacteriales|Enterobacteriaceae|Enterobacter|Enterobacter cloacae complex|Enterobacter cloacae	Bacteria	Proteobacteria	Gammaproteobacteria	Enterobacteriales	Enterobacteriaceae	gi|837355017|gb|CP011798.1|	Enterobacter cloacae strain UW5, complete genome	550	4897296	4896757	540	100	0	98.7
Pcub_MSU1_v1_03325_0_1_1	1	261	Klebsiella pneumoniae	Bacteria|Proteobacteria|Gammaproteobacteria|Enterobacteriales|Enterobacteriaceae|Klebsiella|Klebsiella pneumoniae	Bacteria	Proteobacteria	Gammaproteobacteria	Enterobacteriales	Enterobacteriaceae	gi|927657646|dbj|AP014950.1|	Klebsiella pneumoniae DNA, complete genome, strain: YH43	573	426989	427249	261	100	9e-123	97.7
Pcub_MSU1_v1_03325_0_6_1	1	435	Enterobacter asburiae	Bacteria|Proteobacteria|Gammaproteobacteria|Enterobacteriales|Enterobacteriaceae|Enterobacter|Enterobacter cloacae complex|Enterobacter asburiae	Bacteria	Proteobacteria	Gammaproteobacteria	Enterobacteriales	Enterobacteriaceae	gi|910286592|gb|CP012162.1|	Enterobacter asburiae strain 35734, complete genome	61645	4496091	4495657	435	100	0	97.01
Pcub_MSU1_v1_03325_0_7_1	1	501	Enterobacter asburiae LF7a	Bacteria|Proteobacteria|Gammaproteobacteria|Enterobacteriales|Enterobacteriaceae|Enterobacter|Enterobacter cloacae complex|Enterobacter asburiae|Enterobacter asburiae LF7a	Bacteria	Proteobacteria	Gammaproteobacteria	Enterobacteriales	Enterobacteriaceae	gi|345091121|gb|CP003026.1|	Enterobacter asburiae LF7a, complete genome	640513	4303346	4302846	501	100	0	97.8
Pcub_MSU1_v1_03325_0_8_1	1	180	Enterobacter asburiae	Bacteria|Proteobacteria|Gammaproteobacteria|Enterobacteriales|Enterobacteriaceae|Enterobacter|Enterobacter cloacae complex|Enterobacter asburiae	Bacteria	Proteobacteria	Gammaproteobacteria	Enterobacteriales	Enterobacteriaceae	gi|910286592|gb|CP012162.1|	Enterobacter asburiae strain 35734, complete genome	61645	4496274	4496095	180	100	6e-83	98.33
Pcub_MSU1_v1_03330_0_1_1	1	1119	Pseudomonas putida BIRD-1	Bacteria|Proteobacteria|Gammaproteobacteria|Pseudomonadales|Pseudomonadaceae|Pseudomonas|Pseudomonas putida group|Pseudomonas putida|Pseudomonas putida BIRD-1	Bacteria	Proteobacteria	Gammaproteobacteria	Pseudomonadales	Pseudomonadaceae	gi|313496345|gb|CP002290.1|	Pseudomonas putida BIRD-1, complete genome	931281	5534395	5533277	1121	100	0	90.45
Pcub_MSU1_v1_03330_0_2_1	1	666	Pseudomonas putida S12	Bacteria|Proteobacteria|Gammaproteobacteria|Pseudomonadales|Pseudomonadaceae|Pseudomonas|Pseudomonas putida group|Pseudomonas putida|Pseudomonas putida S12	Bacteria	Proteobacteria	Gammaproteobacteria	Pseudomonadales	Pseudomonadaceae	gi|734574563|gb|CP009974.1|	Pseudomonas putida S12, complete genome	1215087	2396352	2397017	666	100	0	99.55
Pcub_MSU1_v1_03335_0_2_1	1	933	Acinetobacter oleivorans DR1	Bacteria|Proteobacteria|Gammaproteobacteria|Pseudomonadales|Moraxellaceae|Acinetobacter|Acinetobacter oleivorans|Acinetobacter oleivorans DR1	Bacteria	Proteobacteria	Gammaproteobacteria	Pseudomonadales	Moraxellaceae	gi|298698338|gb|CP002080.1|	Acinetobacter oleivorans DR1, complete genome	436717	920924	921856	933	100	0	96.36
Pcub_MSU1_v1_03335_0_3_1	1	750	Acinetobacter oleivorans DR1	Bacteria|Proteobacteria|Gammaproteobacteria|Pseudomonadales|Moraxellaceae|Acinetobacter|Acinetobacter oleivorans|Acinetobacter oleivorans DR1	Bacteria	Proteobacteria	Gammaproteobacteria	Pseudomonadales	Moraxellaceae	gi|298698338|gb|CP002080.1|	Acinetobacter oleivorans DR1, complete genome	436717	920157	920906	750	100	0	98.4
Pcub_MSU1_v1_03336_0_0_1	1	255	Acinetobacter oleivorans DR1	Bacteria|Proteobacteria|Gammaproteobacteria|Pseudomonadales|Moraxellaceae|Acinetobacter|Acinetobacter oleivorans|Acinetobacter oleivorans DR1	Bacteria	Proteobacteria	Gammaproteobacteria	Pseudomonadales	Moraxellaceae	gi|298698338|gb|CP002080.1|	Acinetobacter oleivorans DR1, complete genome	436717	3653899	3654153	255	100	9e-118	97.25
Pcub_MSU1_v1_03336_0_1_1	1	510	Acinetobacter oleivorans DR1	Bacteria|Proteobacteria|Gammaproteobacteria|Pseudomonadales|Moraxellaceae|Acinetobacter|Acinetobacter oleivorans|Acinetobacter oleivorans DR1	Bacteria	Proteobacteria	Gammaproteobacteria	Pseudomonadales	Moraxellaceae	gi|298698338|gb|CP002080.1|	Acinetobacter oleivorans DR1, complete genome	436717	3652219	3652728	510	100	0	95.29
Pcub_MSU1_v1_03340_0_0_1	1	1167	Delftia sp. Cs1-4	Bacteria|Proteobacteria|Betaproteobacteria|Burkholderiales|Comamonadaceae|Delftia|Delftia sp. Cs1-4	Bacteria	Proteobacteria	Betaproteobacteria	Burkholderiales	Comamonadaceae	gi|333741867|gb|CP002735.1|	Delftia sp. Cs1-4, complete genome	742013	3702657	3703823	1167	100	0	97.69
Pcub_MSU1_v1_03342_0_0_1	1	1176	Delftia sp. Cs1-4	Bacteria|Proteobacteria|Betaproteobacteria|Burkholderiales|Comamonadaceae|Delftia|Delftia sp. Cs1-4	Bacteria	Proteobacteria	Betaproteobacteria	Burkholderiales	Comamonadaceae	gi|333741867|gb|CP002735.1|	Delftia sp. Cs1-4, complete genome	742013	351110	352285	1176	100	0	97.45
Pcub_MSU1_v1_03343_0_3_1	1	1425	Delftia acidovorans SPH-1	Bacteria|Proteobacteria|Betaproteobacteria|Burkholderiales|Comamonadaceae|Delftia|Delftia acidovorans|Delftia acidovorans SPH-1	Bacteria	Proteobacteria	Betaproteobacteria	Burkholderiales	Comamonadaceae	gi|160361034|gb|CP000884.1|	Delftia acidovorans SPH-1, complete genome	398578	6239864	6238426	1439	100	0	98.26
Pcub_MSU1_v1_03343_0_7_1	1	435	Delftia sp. Cs1-4	Bacteria|Proteobacteria|Betaproteobacteria|Burkholderiales|Comamonadaceae|Delftia|Delftia sp. Cs1-4	Bacteria	Proteobacteria	Betaproteobacteria	Burkholderiales	Comamonadaceae	gi|333741867|gb|CP002735.1|	Delftia sp. Cs1-4, complete genome	742013	1128947	1129381	435	100	0	99.08
Pcub_MSU1_v1_03344_0_0_1	1	807	Delftia sp. Cs1-4	Bacteria|Proteobacteria|Betaproteobacteria|Burkholderiales|Comamonadaceae|Delftia|Delftia sp. Cs1-4	Bacteria	Proteobacteria	Betaproteobacteria	Burkholderiales	Comamonadaceae	gi|333741867|gb|CP002735.1|	Delftia sp. Cs1-4, complete genome	742013	1789436	1788630	807	100	0	98.27
Pcub_MSU1_v1_03352_0_2_1	1	942	Delftia sp. Cs1-4	Bacteria|Proteobacteria|Betaproteobacteria|Burkholderiales|Comamonadaceae|Delftia|Delftia sp. Cs1-4	Bacteria	Proteobacteria	Betaproteobacteria	Burkholderiales	Comamonadaceae	gi|333741867|gb|CP002735.1|	Delftia sp. Cs1-4, complete genome	742013	705307	706248	942	100	0	99.15
Pcub_MSU1_v1_03353_0_0_1	1	426	Stenotrophomonas maltophilia D457	Bacteria|Proteobacteria|Gammaproteobacteria|Xanthomonadales|Xanthomonadaceae|Stenotrophomonas|Stenotrophomonas maltophilia group|Stenotrophomonas maltophilia|Stenotrophomonas maltophilia D457	Bacteria	Proteobacteria	Gammaproteobacteria	Xanthomonadales	Xanthomonadaceae	gi|384076029|emb|HE798556.1|	Stenotrophomonas maltophilia D457 complete genome	1163399	353436	353011	426	100	0	99.77
Pcub_MSU1_v1_03353_0_1_1	1	1023	Stenotrophomonas maltophilia D457	Bacteria|Proteobacteria|Gammaproteobacteria|Xanthomonadales|Xanthomonadaceae|Stenotrophomonas|Stenotrophomonas maltophilia group|Stenotrophomonas maltophilia|Stenotrophomonas maltophilia D457	Bacteria	Proteobacteria	Gammaproteobacteria	Xanthomonadales	Xanthomonadaceae	gi|384076029|emb|HE798556.1|	Stenotrophomonas maltophilia D457 complete genome	1163399	355221	354199	1023	100	0	99.32
Pcub_MSU1_v1_03365_0_2_1	1	1206	Delftia acidovorans SPH-1	Bacteria|Proteobacteria|Betaproteobacteria|Burkholderiales|Comamonadaceae|Delftia|Delftia acidovorans|Delftia acidovorans SPH-1	Bacteria	Proteobacteria	Betaproteobacteria	Burkholderiales	Comamonadaceae	gi|160361034|gb|CP000884.1|	Delftia acidovorans SPH-1, complete genome	398578	928219	929424	1206	100	0	92.79
Pcub_MSU1_v1_03376_0_0_1	1	2592	Delftia acidovorans SPH-1	Bacteria|Proteobacteria|Betaproteobacteria|Burkholderiales|Comamonadaceae|Delftia|Delftia acidovorans|Delftia acidovorans SPH-1	Bacteria	Proteobacteria	Betaproteobacteria	Burkholderiales	Comamonadaceae	gi|160361034|gb|CP000884.1|	Delftia acidovorans SPH-1, complete genome	398578	2687265	2689856	2593	100	0	95.3
Pcub_MSU1_v1_03384_0_0_1	1	963	Delftia sp. Cs1-4	Bacteria|Proteobacteria|Betaproteobacteria|Burkholderiales|Comamonadaceae|Delftia|Delftia sp. Cs1-4	Bacteria	Proteobacteria	Betaproteobacteria	Burkholderiales	Comamonadaceae	gi|333741867|gb|CP002735.1|	Delftia sp. Cs1-4, complete genome	742013	1329898	1328936	963	100	0	93.98
Pcub_MSU1_v1_03384_0_2_1	1	753	Delftia acidovorans SPH-1	Bacteria|Proteobacteria|Betaproteobacteria|Burkholderiales|Comamonadaceae|Delftia|Delftia acidovorans|Delftia acidovorans SPH-1	Bacteria	Proteobacteria	Betaproteobacteria	Burkholderiales	Comamonadaceae	gi|160361034|gb|CP000884.1|	Delftia acidovorans SPH-1, complete genome	398578	6037682	6038434	753	100	0	94.29
Pcub_MSU1_v1_03403_0_4_1	1	654	Delftia acidovorans SPH-1	Bacteria|Proteobacteria|Betaproteobacteria|Burkholderiales|Comamonadaceae|Delftia|Delftia acidovorans|Delftia acidovorans SPH-1	Bacteria	Proteobacteria	Betaproteobacteria	Burkholderiales	Comamonadaceae	gi|160361034|gb|CP000884.1|	Delftia acidovorans SPH-1, complete genome	398578	3332435	3333088	654	100	0	99.39
Pcub_MSU1_v1_03404_0_0_1	1	1497	Cucumis hystrix	Eukaryota|Viridiplantae|Streptophyta|Streptophytina|Embryophyta|Tracheophyta|Euphyllophyta|Spermatophyta|Magnoliophyta|Mesangiospermae|eudicotyledons|Gunneridae|Pentapetalae|rosids|fabids|Cucurbitales|Cucurbitaceae|Benincaseae|Cucumis|Cucumis hystrix	Eukaryota	Viridiplantae	Streptophyta	Streptophytina	Embryophyta	gi|586598666|gb|KF957866.1|	Cucumis hystrix plastid, complete genome	396994	56764	55268	1497	100	0	100
Pcub_MSU1_v1_03408_0_2_1	1	2181	Delftia sp. Cs1-4	Bacteria|Proteobacteria|Betaproteobacteria|Burkholderiales|Comamonadaceae|Delftia|Delftia sp. Cs1-4	Bacteria	Proteobacteria	Betaproteobacteria	Burkholderiales	Comamonadaceae	gi|333741867|gb|CP002735.1|	Delftia sp. Cs1-4, complete genome	742013	1766415	1768595	2184	100	0	95.6
Pcub_MSU1_v1_03420_0_0_1	1	3450	Pseudomonas putida S12	Bacteria|Proteobacteria|Gammaproteobacteria|Pseudomonadales|Pseudomonadaceae|Pseudomonas|Pseudomonas putida group|Pseudomonas putida|Pseudomonas putida S12	Bacteria	Proteobacteria	Gammaproteobacteria	Pseudomonadales	Pseudomonadaceae	gi|734574563|gb|CP009974.1|	Pseudomonas putida S12, complete genome	1215087	1567046	1563597	3452	100	0	94.55
Pcub_MSU1_v1_03424_0_1_1	1	261	Flavobacterium indicum GPTSA100-9 = DSM 17447	Bacteria|Bacteroidetes/Chlorobi group|Bacteroidetes|Flavobacteriia|Flavobacteriales|Flavobacteriaceae|Flavobacterium|Flavobacterium indicum|Flavobacterium indicum GPTSA100-9 = DSM 17447	Bacteria	Bacteroidetes/Chlorobi group	Bacteroidetes	Flavobacteriia	Flavobacteriales	gi|380500974|emb|HE774682.1|	Flavobacterium indicum GPTSA100-9 complete genome	1094466	512884	512624	261	100	2e-99	92.34
Pcub_MSU1_v1_03427_0_0_1	1	972	Stenotrophomonas maltophilia D457	Bacteria|Proteobacteria|Gammaproteobacteria|Xanthomonadales|Xanthomonadaceae|Stenotrophomonas|Stenotrophomonas maltophilia group|Stenotrophomonas maltophilia|Stenotrophomonas maltophilia D457	Bacteria	Proteobacteria	Gammaproteobacteria	Xanthomonadales	Xanthomonadaceae	gi|384076029|emb|HE798556.1|	Stenotrophomonas maltophilia D457 complete genome	1163399	2113254	2114225	972	100	0	99.49
Pcub_MSU1_v1_03427_0_1_1	1	192	Stenotrophomonas maltophilia D457	Bacteria|Proteobacteria|Gammaproteobacteria|Xanthomonadales|Xanthomonadaceae|Stenotrophomonas|Stenotrophomonas maltophilia group|Stenotrophomonas maltophilia|Stenotrophomonas maltophilia D457	Bacteria	Proteobacteria	Gammaproteobacteria	Xanthomonadales	Xanthomonadaceae	gi|384076029|emb|HE798556.1|	Stenotrophomonas maltophilia D457 complete genome	1163399	2114519	2114328	192	100	1e-94	100
Pcub_MSU1_v1_03427_0_4_1	1	456	Stenotrophomonas maltophilia D457	Bacteria|Proteobacteria|Gammaproteobacteria|Xanthomonadales|Xanthomonadaceae|Stenotrophomonas|Stenotrophomonas maltophilia group|Stenotrophomonas maltophilia|Stenotrophomonas maltophilia D457	Bacteria	Proteobacteria	Gammaproteobacteria	Xanthomonadales	Xanthomonadaceae	gi|384076029|emb|HE798556.1|	Stenotrophomonas maltophilia D457 complete genome	1163399	2115897	2115442	457	100	0	92.12
Pcub_MSU1_v1_03428_0_0_1	1	1467	Acinetobacter oleivorans DR1	Bacteria|Proteobacteria|Gammaproteobacteria|Pseudomonadales|Moraxellaceae|Acinetobacter|Acinetobacter oleivorans|Acinetobacter oleivorans DR1	Bacteria	Proteobacteria	Gammaproteobacteria	Pseudomonadales	Moraxellaceae	gi|298698338|gb|CP002080.1|	Acinetobacter oleivorans DR1, complete genome	436717	3117301	3115835	1467	100	0	92.09
Pcub_MSU1_v1_03435_0_3_1	1	921	Acidovorax ebreus TPSY	Bacteria|Proteobacteria|Betaproteobacteria|Burkholderiales|Comamonadaceae|Acidovorax|Acidovorax ebreus|Acidovorax ebreus TPSY	Bacteria	Proteobacteria	Betaproteobacteria	Burkholderiales	Comamonadaceae	gi|221728669|gb|CP001392.1|	Acidovorax ebreus TPSY, complete genome	535289	2447103	2448023	922	100	0	90.24
Pcub_MSU1_v1_03437_0_1_1	1	609	Stenotrophomonas maltophilia D457	Bacteria|Proteobacteria|Gammaproteobacteria|Xanthomonadales|Xanthomonadaceae|Stenotrophomonas|Stenotrophomonas maltophilia group|Stenotrophomonas maltophilia|Stenotrophomonas maltophilia D457	Bacteria	Proteobacteria	Gammaproteobacteria	Xanthomonadales	Xanthomonadaceae	gi|384076029|emb|HE798556.1|	Stenotrophomonas maltophilia D457 complete genome	1163399	980955	981563	609	100	0	100
Pcub_MSU1_v1_03437_0_2_1	1	627	Stenotrophomonas maltophilia D457	Bacteria|Proteobacteria|Gammaproteobacteria|Xanthomonadales|Xanthomonadaceae|Stenotrophomonas|Stenotrophomonas maltophilia group|Stenotrophomonas maltophilia|Stenotrophomonas maltophilia D457	Bacteria	Proteobacteria	Gammaproteobacteria	Xanthomonadales	Xanthomonadaceae	gi|384076029|emb|HE798556.1|	Stenotrophomonas maltophilia D457 complete genome	1163399	980202	980828	627	100	0	99.52
Pcub_MSU1_v1_03438_0_0_1	1	420	Acinetobacter oleivorans DR1	Bacteria|Proteobacteria|Gammaproteobacteria|Pseudomonadales|Moraxellaceae|Acinetobacter|Acinetobacter oleivorans|Acinetobacter oleivorans DR1	Bacteria	Proteobacteria	Gammaproteobacteria	Pseudomonadales	Moraxellaceae	gi|298698338|gb|CP002080.1|	Acinetobacter oleivorans DR1, complete genome	436717	1539683	1539264	420	100	0	97.62
Pcub_MSU1_v1_03438_0_1_1	1	1371	Acinetobacter calcoaceticus PHEA-2	Bacteria|Proteobacteria|Gammaproteobacteria|Pseudomonadales|Moraxellaceae|Acinetobacter|Acinetobacter calcoaceticus/baumannii complex|Acinetobacter calcoaceticus|Acinetobacter calcoaceticus PHEA-2	Bacteria	Proteobacteria	Gammaproteobacteria	Pseudomonadales	Moraxellaceae	gi|325121063|gb|CP002177.1|	Acinetobacter calcoaceticus PHEA-2, complete genome	871585	1617154	1618521	1371	100	0	94.31
Pcub_MSU1_v1_03442_0_2_1	1	960	Delftia sp. Cs1-4	Bacteria|Proteobacteria|Betaproteobacteria|Burkholderiales|Comamonadaceae|Delftia|Delftia sp. Cs1-4	Bacteria	Proteobacteria	Betaproteobacteria	Burkholderiales	Comamonadaceae	gi|333741867|gb|CP002735.1|	Delftia sp. Cs1-4, complete genome	742013	5310104	5309145	960	100	0	98.96
Pcub_MSU1_v1_03459_0_0_1	1	2835	Delftia sp. Cs1-4	Bacteria|Proteobacteria|Betaproteobacteria|Burkholderiales|Comamonadaceae|Delftia|Delftia sp. Cs1-4	Bacteria	Proteobacteria	Betaproteobacteria	Burkholderiales	Comamonadaceae	gi|333741867|gb|CP002735.1|	Delftia sp. Cs1-4, complete genome	742013	3345849	3342977	2874	100	0	93.18
Pcub_MSU1_v1_03472_0_0_1	1	1113	Stenotrophomonas maltophilia D457	Bacteria|Proteobacteria|Gammaproteobacteria|Xanthomonadales|Xanthomonadaceae|Stenotrophomonas|Stenotrophomonas maltophilia group|Stenotrophomonas maltophilia|Stenotrophomonas maltophilia D457	Bacteria	Proteobacteria	Gammaproteobacteria	Xanthomonadales	Xanthomonadaceae	gi|384076029|emb|HE798556.1|	Stenotrophomonas maltophilia D457 complete genome	1163399	4008115	4009227	1113	100	0	99.46
Pcub_MSU1_v1_03472_0_2_1	1	279	Stenotrophomonas maltophilia D457	Bacteria|Proteobacteria|Gammaproteobacteria|Xanthomonadales|Xanthomonadaceae|Stenotrophomonas|Stenotrophomonas maltophilia group|Stenotrophomonas maltophilia|Stenotrophomonas maltophilia D457	Bacteria	Proteobacteria	Gammaproteobacteria	Xanthomonadales	Xanthomonadaceae	gi|384076029|emb|HE798556.1|	Stenotrophomonas maltophilia D457 complete genome	1163399	4006684	4006406	279	100	1e-142	100
Pcub_MSU1_v1_03473_0_2_1	1	2070	Delftia sp. Cs1-4	Bacteria|Proteobacteria|Betaproteobacteria|Burkholderiales|Comamonadaceae|Delftia|Delftia sp. Cs1-4	Bacteria	Proteobacteria	Betaproteobacteria	Burkholderiales	Comamonadaceae	gi|333741867|gb|CP002735.1|	Delftia sp. Cs1-4, complete genome	742013	556391	554322	2070	100	0	97.54
Pcub_MSU1_v1_03481_0_2_1	1	1107	Delftia acidovorans SPH-1	Bacteria|Proteobacteria|Betaproteobacteria|Burkholderiales|Comamonadaceae|Delftia|Delftia acidovorans|Delftia acidovorans SPH-1	Bacteria	Proteobacteria	Betaproteobacteria	Burkholderiales	Comamonadaceae	gi|160361034|gb|CP000884.1|	Delftia acidovorans SPH-1, complete genome	398578	2318812	2319918	1107	100	0	97.02
Pcub_MSU1_v1_03482_0_4_1	1	1038	Delftia acidovorans SPH-1	Bacteria|Proteobacteria|Betaproteobacteria|Burkholderiales|Comamonadaceae|Delftia|Delftia acidovorans|Delftia acidovorans SPH-1	Bacteria	Proteobacteria	Betaproteobacteria	Burkholderiales	Comamonadaceae	gi|160361034|gb|CP000884.1|	Delftia acidovorans SPH-1, complete genome	398578	3145676	3146713	1039	100	0	90.57
Pcub_MSU1_v1_03482_0_5_1	1	1041	Pantholops hodgsonii	Eukaryota|Opisthokonta|Metazoa|Eumetazoa|Bilateria|Deuterostomia|Chordata|Craniata|Vertebrata|Gnathostomata|Teleostomi|Euteleostomi|Sarcopterygii|Dipnotetrapodomorpha|Tetrapoda|Amniota|Mammalia|Theria|Eutheria|Boreoeutheria|Laurasiatheria|Cetartiodactyla|Ruminantia|Pecora|Bovidae|Antilopinae|Pantholops|Pantholops hodgsonii	Eukaryota	Opisthokonta	Metazoa	Eumetazoa	Bilateria	gi|556760857|ref|XM_005975682.1|	PREDICTED: Pantholops hodgsonii CDK5RAP1-like protein-like (LOC102333500), mRNA	59538	376	1416	1041	100	0	98.85
Pcub_MSU1_v1_03485_0_1_1	1	540	Delftia acidovorans SPH-1	Bacteria|Proteobacteria|Betaproteobacteria|Burkholderiales|Comamonadaceae|Delftia|Delftia acidovorans|Delftia acidovorans SPH-1	Bacteria	Proteobacteria	Betaproteobacteria	Burkholderiales	Comamonadaceae	gi|160361034|gb|CP000884.1|	Delftia acidovorans SPH-1, complete genome	398578	6233631	6234170	540	100	0	98.15
Pcub_MSU1_v1_03487_0_0_1	1	684	Delftia sp. Cs1-4	Bacteria|Proteobacteria|Betaproteobacteria|Burkholderiales|Comamonadaceae|Delftia|Delftia sp. Cs1-4	Bacteria	Proteobacteria	Betaproteobacteria	Burkholderiales	Comamonadaceae	gi|333741867|gb|CP002735.1|	Delftia sp. Cs1-4, complete genome	742013	6541401	6540718	684	100	0	98.54
Pcub_MSU1_v1_03487_0_4_1	1	1968	Delftia acidovorans SPH-1	Bacteria|Proteobacteria|Betaproteobacteria|Burkholderiales|Comamonadaceae|Delftia|Delftia acidovorans|Delftia acidovorans SPH-1	Bacteria	Proteobacteria	Betaproteobacteria	Burkholderiales	Comamonadaceae	gi|160361034|gb|CP000884.1|	Delftia acidovorans SPH-1, complete genome	398578	799027	797060	1968	100	0	95.17
Pcub_MSU1_v1_03487_0_5_1	1	471	Delftia sp. Cs1-4	Bacteria|Proteobacteria|Betaproteobacteria|Burkholderiales|Comamonadaceae|Delftia|Delftia sp. Cs1-4	Bacteria	Proteobacteria	Betaproteobacteria	Burkholderiales	Comamonadaceae	gi|333741867|gb|CP002735.1|	Delftia sp. Cs1-4, complete genome	742013	6541455	6541925	471	100	0	99.15
Pcub_MSU1_v1_03493_0_2_1	1	675	Delftia acidovorans SPH-1	Bacteria|Proteobacteria|Betaproteobacteria|Burkholderiales|Comamonadaceae|Delftia|Delftia acidovorans|Delftia acidovorans SPH-1	Bacteria	Proteobacteria	Betaproteobacteria	Burkholderiales	Comamonadaceae	gi|160361034|gb|CP000884.1|	Delftia acidovorans SPH-1, complete genome	398578	944019	943345	675	100	0	96.3
Pcub_MSU1_v1_03493_0_5_1	1	1761	Delftia sp. Cs1-4	Bacteria|Proteobacteria|Betaproteobacteria|Burkholderiales|Comamonadaceae|Delftia|Delftia sp. Cs1-4	Bacteria	Proteobacteria	Betaproteobacteria	Burkholderiales	Comamonadaceae	gi|333741867|gb|CP002735.1|	Delftia sp. Cs1-4, complete genome	742013	6399100	6397340	1761	100	0	96.48
Pcub_MSU1_v1_03494_0_3_1	1	1350	Acidovorax avenae subsp. avenae ATCC 19860	Bacteria|Proteobacteria|Betaproteobacteria|Burkholderiales|Comamonadaceae|Acidovorax|Acidovorax avenae|Acidovorax avenae subsp. avenae|Acidovorax avenae subsp. avenae ATCC 19860	Bacteria	Proteobacteria	Betaproteobacteria	Burkholderiales	Comamonadaceae	gi|323371659|gb|CP002521.1|	Acidovorax avenae subsp. avenae ATCC 19860, complete genome	643561	866070	867419	1351	100	0	90.82
Pcub_MSU1_v1_03497_0_0_1	1	2028	Pantholops hodgsonii	Eukaryota|Opisthokonta|Metazoa|Eumetazoa|Bilateria|Deuterostomia|Chordata|Craniata|Vertebrata|Gnathostomata|Teleostomi|Euteleostomi|Sarcopterygii|Dipnotetrapodomorpha|Tetrapoda|Amniota|Mammalia|Theria|Eutheria|Boreoeutheria|Laurasiatheria|Cetartiodactyla|Ruminantia|Pecora|Bovidae|Antilopinae|Pantholops|Pantholops hodgsonii	Eukaryota	Opisthokonta	Metazoa	Eumetazoa	Bilateria	gi|556757400|ref|XM_005973982.1|	PREDICTED: Pantholops hodgsonii 3-phosphoshikimate 1-carboxyvinyltransferase, chloroplastic-like (LOC102335879), mRNA	59538	1	2037	2037	100	0	98.82
Pcub_MSU1_v1_03499_0_0_1	1	717	Stenotrophomonas maltophilia D457	Bacteria|Proteobacteria|Gammaproteobacteria|Xanthomonadales|Xanthomonadaceae|Stenotrophomonas|Stenotrophomonas maltophilia group|Stenotrophomonas maltophilia|Stenotrophomonas maltophilia D457	Bacteria	Proteobacteria	Gammaproteobacteria	Xanthomonadales	Xanthomonadaceae	gi|384076029|emb|HE798556.1|	Stenotrophomonas maltophilia D457 complete genome	1163399	2109663	2108947	717	100	0	99.72
Pcub_MSU1_v1_03501_0_1_1	1	603	Delftia acidovorans SPH-1	Bacteria|Proteobacteria|Betaproteobacteria|Burkholderiales|Comamonadaceae|Delftia|Delftia acidovorans|Delftia acidovorans SPH-1	Bacteria	Proteobacteria	Betaproteobacteria	Burkholderiales	Comamonadaceae	gi|160361034|gb|CP000884.1|	Delftia acidovorans SPH-1, complete genome	398578	5293731	5294333	603	100	0	99.17
Pcub_MSU1_v1_03503_0_0_1	1	723	Acinetobacter oleivorans DR1	Bacteria|Proteobacteria|Gammaproteobacteria|Pseudomonadales|Moraxellaceae|Acinetobacter|Acinetobacter oleivorans|Acinetobacter oleivorans DR1	Bacteria	Proteobacteria	Gammaproteobacteria	Pseudomonadales	Moraxellaceae	gi|298698338|gb|CP002080.1|	Acinetobacter oleivorans DR1, complete genome	436717	3581513	3580791	723	100	0	93.64
Pcub_MSU1_v1_03506_0_1_1	1	1995	Pseudomonas putida S12	Bacteria|Proteobacteria|Gammaproteobacteria|Pseudomonadales|Pseudomonadaceae|Pseudomonas|Pseudomonas putida group|Pseudomonas putida|Pseudomonas putida S12	Bacteria	Proteobacteria	Gammaproteobacteria	Pseudomonadales	Pseudomonadaceae	gi|734574563|gb|CP009974.1|	Pseudomonas putida S12, complete genome	1215087	1990325	1988331	1995	100	0	99.7
Pcub_MSU1_v1_03511_0_2_1	1	2355	Stenotrophomonas maltophilia D457	Bacteria|Proteobacteria|Gammaproteobacteria|Xanthomonadales|Xanthomonadaceae|Stenotrophomonas|Stenotrophomonas maltophilia group|Stenotrophomonas maltophilia|Stenotrophomonas maltophilia D457	Bacteria	Proteobacteria	Gammaproteobacteria	Xanthomonadales	Xanthomonadaceae	gi|384076029|emb|HE798556.1|	Stenotrophomonas maltophilia D457 complete genome	1163399	1858458	1856104	2355	100	0	96.69
Pcub_MSU1_v1_03513_0_2_1	1	2136	Pseudomonas putida BIRD-1	Bacteria|Proteobacteria|Gammaproteobacteria|Pseudomonadales|Pseudomonadaceae|Pseudomonas|Pseudomonas putida group|Pseudomonas putida|Pseudomonas putida BIRD-1	Bacteria	Proteobacteria	Gammaproteobacteria	Pseudomonadales	Pseudomonadaceae	gi|313496345|gb|CP002290.1|	Pseudomonas putida BIRD-1, complete genome	931281	148723	150858	2136	100	0	99.81
Pcub_MSU1_v1_03516_0_0_1	1	3753	Stenotrophomonas maltophilia D457	Bacteria|Proteobacteria|Gammaproteobacteria|Xanthomonadales|Xanthomonadaceae|Stenotrophomonas|Stenotrophomonas maltophilia group|Stenotrophomonas maltophilia|Stenotrophomonas maltophilia D457	Bacteria	Proteobacteria	Gammaproteobacteria	Xanthomonadales	Xanthomonadaceae	gi|384076029|emb|HE798556.1|	Stenotrophomonas maltophilia D457 complete genome	1163399	1622297	1626049	3753	100	0	93.71
Pcub_MSU1_v1_03520_0_0_1	1	990	Stenotrophomonas maltophilia D457	Bacteria|Proteobacteria|Gammaproteobacteria|Xanthomonadales|Xanthomonadaceae|Stenotrophomonas|Stenotrophomonas maltophilia group|Stenotrophomonas maltophilia|Stenotrophomonas maltophilia D457	Bacteria	Proteobacteria	Gammaproteobacteria	Xanthomonadales	Xanthomonadaceae	gi|384076029|emb|HE798556.1|	Stenotrophomonas maltophilia D457 complete genome	1163399	3016165	3017154	990	100	0	96.67
Pcub_MSU1_v1_03521_0_1_1	1	540	Acidovorax avenae subsp. avenae ATCC 19860	Bacteria|Proteobacteria|Betaproteobacteria|Burkholderiales|Comamonadaceae|Acidovorax|Acidovorax avenae|Acidovorax avenae subsp. avenae|Acidovorax avenae subsp. avenae ATCC 19860	Bacteria	Proteobacteria	Betaproteobacteria	Burkholderiales	Comamonadaceae	gi|323371659|gb|CP002521.1|	Acidovorax avenae subsp. avenae ATCC 19860, complete genome	643561	4086836	4086297	540	100	0	91.3
Pcub_MSU1_v1_03523_0_0_1	1	1734	Stenotrophomonas maltophilia D457	Bacteria|Proteobacteria|Gammaproteobacteria|Xanthomonadales|Xanthomonadaceae|Stenotrophomonas|Stenotrophomonas maltophilia group|Stenotrophomonas maltophilia|Stenotrophomonas maltophilia D457	Bacteria	Proteobacteria	Gammaproteobacteria	Xanthomonadales	Xanthomonadaceae	gi|384076029|emb|HE798556.1|	Stenotrophomonas maltophilia D457 complete genome	1163399	701392	699659	1734	100	0	99.6
Pcub_MSU1_v1_03530_0_0_1	1	1173	Acinetobacter oleivorans DR1	Bacteria|Proteobacteria|Gammaproteobacteria|Pseudomonadales|Moraxellaceae|Acinetobacter|Acinetobacter oleivorans|Acinetobacter oleivorans DR1	Bacteria	Proteobacteria	Gammaproteobacteria	Pseudomonadales	Moraxellaceae	gi|298698338|gb|CP002080.1|	Acinetobacter oleivorans DR1, complete genome	436717	2349346	2348174	1173	100	0	94.29
Pcub_MSU1_v1_03532_0_0_1	1	981	Delftia acidovorans SPH-1	Bacteria|Proteobacteria|Betaproteobacteria|Burkholderiales|Comamonadaceae|Delftia|Delftia acidovorans|Delftia acidovorans SPH-1	Bacteria	Proteobacteria	Betaproteobacteria	Burkholderiales	Comamonadaceae	gi|160361034|gb|CP000884.1|	Delftia acidovorans SPH-1, complete genome	398578	6257168	6256188	981	100	0	99.39
Pcub_MSU1_v1_03536_0_0_1	1	1110	Acinetobacter oleivorans DR1	Bacteria|Proteobacteria|Gammaproteobacteria|Pseudomonadales|Moraxellaceae|Acinetobacter|Acinetobacter oleivorans|Acinetobacter oleivorans DR1	Bacteria	Proteobacteria	Gammaproteobacteria	Pseudomonadales	Moraxellaceae	gi|298698338|gb|CP002080.1|	Acinetobacter oleivorans DR1, complete genome	436717	2257503	2258612	1110	100	0	92.97
Pcub_MSU1_v1_03538_0_1_1	1	894	Stenotrophomonas maltophilia	Bacteria|Proteobacteria|Gammaproteobacteria|Xanthomonadales|Xanthomonadaceae|Stenotrophomonas|Stenotrophomonas maltophilia group|Stenotrophomonas maltophilia	Bacteria	Proteobacteria	Gammaproteobacteria	Xanthomonadales	Xanthomonadaceae	gi|565411179|dbj|AB894482.1|	Stenotrophomonas maltophilia genes for aac(6')-Iak locus and around region, complete cds, strain: IOMTU 250	40324	66620	67513	894	100	0	98.88
Pcub_MSU1_v1_03542_0_0_1	1	2061	Delftia sp. Cs1-4	Bacteria|Proteobacteria|Betaproteobacteria|Burkholderiales|Comamonadaceae|Delftia|Delftia sp. Cs1-4	Bacteria	Proteobacteria	Betaproteobacteria	Burkholderiales	Comamonadaceae	gi|333741867|gb|CP002735.1|	Delftia sp. Cs1-4, complete genome	742013	4346038	4348098	2061	100	0	99.08
Pcub_MSU1_v1_03546_0_0_1	1	933	Delftia sp. Cs1-4	Bacteria|Proteobacteria|Betaproteobacteria|Burkholderiales|Comamonadaceae|Delftia|Delftia sp. Cs1-4	Bacteria	Proteobacteria	Betaproteobacteria	Burkholderiales	Comamonadaceae	gi|333741867|gb|CP002735.1|	Delftia sp. Cs1-4, complete genome	742013	5380972	5381904	933	100	0	98.71
Pcub_MSU1_v1_03550_0_0_1	1	1035	Stenotrophomonas maltophilia D457	Bacteria|Proteobacteria|Gammaproteobacteria|Xanthomonadales|Xanthomonadaceae|Stenotrophomonas|Stenotrophomonas maltophilia group|Stenotrophomonas maltophilia|Stenotrophomonas maltophilia D457	Bacteria	Proteobacteria	Gammaproteobacteria	Xanthomonadales	Xanthomonadaceae	gi|384076029|emb|HE798556.1|	Stenotrophomonas maltophilia D457 complete genome	1163399	2885400	2886434	1035	100	0	99.32
Pcub_MSU1_v1_03552_0_0_1	1	1083	Delftia acidovorans SPH-1	Bacteria|Proteobacteria|Betaproteobacteria|Burkholderiales|Comamonadaceae|Delftia|Delftia acidovorans|Delftia acidovorans SPH-1	Bacteria	Proteobacteria	Betaproteobacteria	Burkholderiales	Comamonadaceae	gi|160361034|gb|CP000884.1|	Delftia acidovorans SPH-1, complete genome	398578	5352297	5351215	1083	100	0	98.25
Pcub_MSU1_v1_03559_0_0_1	1	438	Delftia sp. Cs1-4	Bacteria|Proteobacteria|Betaproteobacteria|Burkholderiales|Comamonadaceae|Delftia|Delftia sp. Cs1-4	Bacteria	Proteobacteria	Betaproteobacteria	Burkholderiales	Comamonadaceae	gi|333741867|gb|CP002735.1|	Delftia sp. Cs1-4, complete genome	742013	3514063	3513626	438	100	0	98.86
Pcub_MSU1_v1_03559_0_3_1	1	1275	Delftia sp. Cs1-4	Bacteria|Proteobacteria|Betaproteobacteria|Burkholderiales|Comamonadaceae|Delftia|Delftia sp. Cs1-4	Bacteria	Proteobacteria	Betaproteobacteria	Burkholderiales	Comamonadaceae	gi|333741867|gb|CP002735.1|	Delftia sp. Cs1-4, complete genome	742013	3510584	3511858	1275	100	0	99.14
Pcub_MSU1_v1_03562_0_0_1	1	1584	Delftia sp. Cs1-4	Bacteria|Proteobacteria|Betaproteobacteria|Burkholderiales|Comamonadaceae|Delftia|Delftia sp. Cs1-4	Bacteria	Proteobacteria	Betaproteobacteria	Burkholderiales	Comamonadaceae	gi|333741867|gb|CP002735.1|	Delftia sp. Cs1-4, complete genome	742013	1518955	1517372	1584	100	0	96.91
Pcub_MSU1_v1_03562_0_3_1	1	1062	Pantholops hodgsonii	Eukaryota|Opisthokonta|Metazoa|Eumetazoa|Bilateria|Deuterostomia|Chordata|Craniata|Vertebrata|Gnathostomata|Teleostomi|Euteleostomi|Sarcopterygii|Dipnotetrapodomorpha|Tetrapoda|Amniota|Mammalia|Theria|Eutheria|Boreoeutheria|Laurasiatheria|Cetartiodactyla|Ruminantia|Pecora|Bovidae|Antilopinae|Pantholops|Pantholops hodgsonii	Eukaryota	Opisthokonta	Metazoa	Eumetazoa	Bilateria	gi|556740166|ref|XM_005965568.1|	PREDICTED: Pantholops hodgsonii RNA pseudouridine synthase 2, chloroplastic-like (LOC102334879), mRNA	59538	1	1062	1062	100	0	99.62
Pcub_MSU1_v1_03567_0_4_1	1	669	Delftia sp. Cs1-4	Bacteria|Proteobacteria|Betaproteobacteria|Burkholderiales|Comamonadaceae|Delftia|Delftia sp. Cs1-4	Bacteria	Proteobacteria	Betaproteobacteria	Burkholderiales	Comamonadaceae	gi|333741867|gb|CP002735.1|	Delftia sp. Cs1-4, complete genome	742013	2897122	2896454	669	100	0	97.76
Pcub_MSU1_v1_03568_0_1_1	1	3732	Delftia acidovorans SPH-1	Bacteria|Proteobacteria|Betaproteobacteria|Burkholderiales|Comamonadaceae|Delftia|Delftia acidovorans|Delftia acidovorans SPH-1	Bacteria	Proteobacteria	Betaproteobacteria	Burkholderiales	Comamonadaceae	gi|160361034|gb|CP000884.1|	Delftia acidovorans SPH-1, complete genome	398578	6180102	6176365	3738	100	0	96.92
Pcub_MSU1_v1_03570_0_0_1	1	1116	Pantholops hodgsonii	Eukaryota|Opisthokonta|Metazoa|Eumetazoa|Bilateria|Deuterostomia|Chordata|Craniata|Vertebrata|Gnathostomata|Teleostomi|Euteleostomi|Sarcopterygii|Dipnotetrapodomorpha|Tetrapoda|Amniota|Mammalia|Theria|Eutheria|Boreoeutheria|Laurasiatheria|Cetartiodactyla|Ruminantia|Pecora|Bovidae|Antilopinae|Pantholops|Pantholops hodgsonii	Eukaryota	Opisthokonta	Metazoa	Eumetazoa	Bilateria	gi|556772255|ref|XM_005981232.1|	PREDICTED: Pantholops hodgsonii COBW domain-containing protein 1-like (LOC102320030), mRNA	59538	1	1116	1116	100	0	99.1
Pcub_MSU1_v1_03575_0_0_1	1	1734	Delftia acidovorans SPH-1	Bacteria|Proteobacteria|Betaproteobacteria|Burkholderiales|Comamonadaceae|Delftia|Delftia acidovorans|Delftia acidovorans SPH-1	Bacteria	Proteobacteria	Betaproteobacteria	Burkholderiales	Comamonadaceae	gi|160361034|gb|CP000884.1|	Delftia acidovorans SPH-1, complete genome	398578	1955488	1957221	1734	100	0	97.29
Pcub_MSU1_v1_03582_0_0_1	1	588	Stenotrophomonas maltophilia D457	Bacteria|Proteobacteria|Gammaproteobacteria|Xanthomonadales|Xanthomonadaceae|Stenotrophomonas|Stenotrophomonas maltophilia group|Stenotrophomonas maltophilia|Stenotrophomonas maltophilia D457	Bacteria	Proteobacteria	Gammaproteobacteria	Xanthomonadales	Xanthomonadaceae	gi|384076029|emb|HE798556.1|	Stenotrophomonas maltophilia D457 complete genome	1163399	232908	233495	588	100	0	99.49
Pcub_MSU1_v1_03584_0_2_1	1	2859	Delftia sp. Cs1-4	Bacteria|Proteobacteria|Betaproteobacteria|Burkholderiales|Comamonadaceae|Delftia|Delftia sp. Cs1-4	Bacteria	Proteobacteria	Betaproteobacteria	Burkholderiales	Comamonadaceae	gi|333741867|gb|CP002735.1|	Delftia sp. Cs1-4, complete genome	742013	1299277	1302135	2859	100	0	96.85
Pcub_MSU1_v1_03589_0_0_1	1	693	Pantholops hodgsonii	Eukaryota|Opisthokonta|Metazoa|Eumetazoa|Bilateria|Deuterostomia|Chordata|Craniata|Vertebrata|Gnathostomata|Teleostomi|Euteleostomi|Sarcopterygii|Dipnotetrapodomorpha|Tetrapoda|Amniota|Mammalia|Theria|Eutheria|Boreoeutheria|Laurasiatheria|Cetartiodactyla|Ruminantia|Pecora|Bovidae|Antilopinae|Pantholops|Pantholops hodgsonii	Eukaryota	Opisthokonta	Metazoa	Eumetazoa	Bilateria	gi|556768425|ref|XM_005979368.1|	PREDICTED: Pantholops hodgsonii protein lifeguard 4-like (LOC102332682), mRNA	59538	1	693	693	100	0	99.71
Pcub_MSU1_v1_03595_0_0_1	1	930	Stenotrophomonas maltophilia D457	Bacteria|Proteobacteria|Gammaproteobacteria|Xanthomonadales|Xanthomonadaceae|Stenotrophomonas|Stenotrophomonas maltophilia group|Stenotrophomonas maltophilia|Stenotrophomonas maltophilia D457	Bacteria	Proteobacteria	Gammaproteobacteria	Xanthomonadales	Xanthomonadaceae	gi|384076029|emb|HE798556.1|	Stenotrophomonas maltophilia D457 complete genome	1163399	601131	602060	930	100	0	98.49
Pcub_MSU1_v1_03596_0_0_1	1	1338	Pseudomonas putida KT2440	Bacteria|Proteobacteria|Gammaproteobacteria|Pseudomonadales|Pseudomonadaceae|Pseudomonas|Pseudomonas putida group|Pseudomonas putida|Pseudomonas putida KT2440	Bacteria	Proteobacteria	Gammaproteobacteria	Pseudomonadales	Pseudomonadaceae	gi|24987239|gb|AE015451.1|	Pseudomonas putida KT2440 complete genome	160488	4155474	4154137	1338	100	0	98.8
Pcub_MSU1_v1_03598_0_0_1	1	933	Stenotrophomonas maltophilia D457	Bacteria|Proteobacteria|Gammaproteobacteria|Xanthomonadales|Xanthomonadaceae|Stenotrophomonas|Stenotrophomonas maltophilia group|Stenotrophomonas maltophilia|Stenotrophomonas maltophilia D457	Bacteria	Proteobacteria	Gammaproteobacteria	Xanthomonadales	Xanthomonadaceae	gi|384076029|emb|HE798556.1|	Stenotrophomonas maltophilia D457 complete genome	1163399	1512724	1513656	933	100	0	98.29
Pcub_MSU1_v1_03602_0_0_1	1	687	Stenotrophomonas maltophilia D457	Bacteria|Proteobacteria|Gammaproteobacteria|Xanthomonadales|Xanthomonadaceae|Stenotrophomonas|Stenotrophomonas maltophilia group|Stenotrophomonas maltophilia|Stenotrophomonas maltophilia D457	Bacteria	Proteobacteria	Gammaproteobacteria	Xanthomonadales	Xanthomonadaceae	gi|384076029|emb|HE798556.1|	Stenotrophomonas maltophilia D457 complete genome	1163399	4321664	4320978	687	100	0	98.54
Pcub_MSU1_v1_03602_0_4_1	1	627	Stenotrophomonas maltophilia D457	Bacteria|Proteobacteria|Gammaproteobacteria|Xanthomonadales|Xanthomonadaceae|Stenotrophomonas|Stenotrophomonas maltophilia group|Stenotrophomonas maltophilia|Stenotrophomonas maltophilia D457	Bacteria	Proteobacteria	Gammaproteobacteria	Xanthomonadales	Xanthomonadaceae	gi|384076029|emb|HE798556.1|	Stenotrophomonas maltophilia D457 complete genome	1163399	4319093	4318467	627	100	0	96.81
Pcub_MSU1_v1_03603_0_0_1	1	870	Delftia acidovorans SPH-1	Bacteria|Proteobacteria|Betaproteobacteria|Burkholderiales|Comamonadaceae|Delftia|Delftia acidovorans|Delftia acidovorans SPH-1	Bacteria	Proteobacteria	Betaproteobacteria	Burkholderiales	Comamonadaceae	gi|160361034|gb|CP000884.1|	Delftia acidovorans SPH-1, complete genome	398578	5274451	5275320	870	100	0	97.7
Pcub_MSU1_v1_03603_0_1_1	1	1071	Delftia sp. Cs1-4	Bacteria|Proteobacteria|Betaproteobacteria|Burkholderiales|Comamonadaceae|Delftia|Delftia sp. Cs1-4	Bacteria	Proteobacteria	Betaproteobacteria	Burkholderiales	Comamonadaceae	gi|333741867|gb|CP002735.1|	Delftia sp. Cs1-4, complete genome	742013	2346373	2347443	1071	100	0	97.2
Pcub_MSU1_v1_03604_0_5_1	1	1149	Stenotrophomonas maltophilia R551-3	Bacteria|Proteobacteria|Gammaproteobacteria|Xanthomonadales|Xanthomonadaceae|Stenotrophomonas|Stenotrophomonas maltophilia group|Stenotrophomonas maltophilia|Stenotrophomonas maltophilia R551-3	Bacteria	Proteobacteria	Gammaproteobacteria	Xanthomonadales	Xanthomonadaceae	gi|194346582|gb|CP001111.1|	Stenotrophomonas maltophilia R551-3, complete genome	391008	2841887	2840739	1149	100	0	92.34
Pcub_MSU1_v1_03611_0_1_1	1	2553	Pseudomonas putida S12	Bacteria|Proteobacteria|Gammaproteobacteria|Pseudomonadales|Pseudomonadaceae|Pseudomonas|Pseudomonas putida group|Pseudomonas putida|Pseudomonas putida S12	Bacteria	Proteobacteria	Gammaproteobacteria	Pseudomonadales	Pseudomonadaceae	gi|734574563|gb|CP009974.1|	Pseudomonas putida S12, complete genome	1215087	1612565	1615117	2553	100	0	99.76
Pcub_MSU1_v1_03612_0_0_1	1	1461	Stenotrophomonas maltophilia D457	Bacteria|Proteobacteria|Gammaproteobacteria|Xanthomonadales|Xanthomonadaceae|Stenotrophomonas|Stenotrophomonas maltophilia group|Stenotrophomonas maltophilia|Stenotrophomonas maltophilia D457	Bacteria	Proteobacteria	Gammaproteobacteria	Xanthomonadales	Xanthomonadaceae	gi|384076029|emb|HE798556.1|	Stenotrophomonas maltophilia D457 complete genome	1163399	3284768	3283308	1461	100	0	99.59
Pcub_MSU1_v1_03614_0_0_1	1	1536	Stenotrophomonas maltophilia D457	Bacteria|Proteobacteria|Gammaproteobacteria|Xanthomonadales|Xanthomonadaceae|Stenotrophomonas|Stenotrophomonas maltophilia group|Stenotrophomonas maltophilia|Stenotrophomonas maltophilia D457	Bacteria	Proteobacteria	Gammaproteobacteria	Xanthomonadales	Xanthomonadaceae	gi|384076029|emb|HE798556.1|	Stenotrophomonas maltophilia D457 complete genome	1163399	382020	380485	1536	100	0	97.72
Pcub_MSU1_v1_03617_0_0_1	1	1341	Delftia sp. Cs1-4	Bacteria|Proteobacteria|Betaproteobacteria|Burkholderiales|Comamonadaceae|Delftia|Delftia sp. Cs1-4	Bacteria	Proteobacteria	Betaproteobacteria	Burkholderiales	Comamonadaceae	gi|333741867|gb|CP002735.1|	Delftia sp. Cs1-4, complete genome	742013	1054510	1053170	1341	100	0	98.51
Pcub_MSU1_v1_03617_0_3_1	1	1602	Delftia acidovorans SPH-1	Bacteria|Proteobacteria|Betaproteobacteria|Burkholderiales|Comamonadaceae|Delftia|Delftia acidovorans|Delftia acidovorans SPH-1	Bacteria	Proteobacteria	Betaproteobacteria	Burkholderiales	Comamonadaceae	gi|160361034|gb|CP000884.1|	Delftia acidovorans SPH-1, complete genome	398578	6308894	6307299	1602	100	0	98.06
Pcub_MSU1_v1_03619_0_0_1	1	2127	Delftia acidovorans SPH-1	Bacteria|Proteobacteria|Betaproteobacteria|Burkholderiales|Comamonadaceae|Delftia|Delftia acidovorans|Delftia acidovorans SPH-1	Bacteria	Proteobacteria	Betaproteobacteria	Burkholderiales	Comamonadaceae	gi|160361034|gb|CP000884.1|	Delftia acidovorans SPH-1, complete genome	398578	939027	936901	2127	100	0	97.04
Pcub_MSU1_v1_03620_0_2_1	1	786	Delftia acidovorans SPH-1	Bacteria|Proteobacteria|Betaproteobacteria|Burkholderiales|Comamonadaceae|Delftia|Delftia acidovorans|Delftia acidovorans SPH-1	Bacteria	Proteobacteria	Betaproteobacteria	Burkholderiales	Comamonadaceae	gi|160361034|gb|CP000884.1|	Delftia acidovorans SPH-1, complete genome	398578	4782881	4783666	786	100	0	97.07
Pcub_MSU1_v1_03622_0_0_1	1	3612	Stenotrophomonas maltophilia D457	Bacteria|Proteobacteria|Gammaproteobacteria|Xanthomonadales|Xanthomonadaceae|Stenotrophomonas|Stenotrophomonas maltophilia group|Stenotrophomonas maltophilia|Stenotrophomonas maltophilia D457	Bacteria	Proteobacteria	Gammaproteobacteria	Xanthomonadales	Xanthomonadaceae	gi|384076029|emb|HE798556.1|	Stenotrophomonas maltophilia D457 complete genome	1163399	1622297	1625893	3614	100	0	90.34
Pcub_MSU1_v1_03626_0_0_1	1	792	Delftia acidovorans SPH-1	Bacteria|Proteobacteria|Betaproteobacteria|Burkholderiales|Comamonadaceae|Delftia|Delftia acidovorans|Delftia acidovorans SPH-1	Bacteria	Proteobacteria	Betaproteobacteria	Burkholderiales	Comamonadaceae	gi|160361034|gb|CP000884.1|	Delftia acidovorans SPH-1, complete genome	398578	1954323	1955114	792	100	0	97.35
Pcub_MSU1_v1_03629_0_0_1	1	648	Delftia sp. Cs1-4	Bacteria|Proteobacteria|Betaproteobacteria|Burkholderiales|Comamonadaceae|Delftia|Delftia sp. Cs1-4	Bacteria	Proteobacteria	Betaproteobacteria	Burkholderiales	Comamonadaceae	gi|333741867|gb|CP002735.1|	Delftia sp. Cs1-4, complete genome	742013	6530440	6529793	648	100	0	98.15
Pcub_MSU1_v1_03629_0_1_1	1	2646	Delftia sp. Cs1-4	Bacteria|Proteobacteria|Betaproteobacteria|Burkholderiales|Comamonadaceae|Delftia|Delftia sp. Cs1-4	Bacteria	Proteobacteria	Betaproteobacteria	Burkholderiales	Comamonadaceae	gi|333741867|gb|CP002735.1|	Delftia sp. Cs1-4, complete genome	742013	6529591	6526946	2646	100	0	96.41
Pcub_MSU1_v1_03637_0_1_1	1	303	Acinetobacter calcoaceticus PHEA-2	Bacteria|Proteobacteria|Gammaproteobacteria|Pseudomonadales|Moraxellaceae|Acinetobacter|Acinetobacter calcoaceticus/baumannii complex|Acinetobacter calcoaceticus|Acinetobacter calcoaceticus PHEA-2	Bacteria	Proteobacteria	Gammaproteobacteria	Pseudomonadales	Moraxellaceae	gi|325121063|gb|CP002177.1|	Acinetobacter calcoaceticus PHEA-2, complete genome	871585	1031426	1031728	303	100	2e-114	91.75
Pcub_MSU1_v1_03638_0_1_1	1	540	Delftia acidovorans SPH-1	Bacteria|Proteobacteria|Betaproteobacteria|Burkholderiales|Comamonadaceae|Delftia|Delftia acidovorans|Delftia acidovorans SPH-1	Bacteria	Proteobacteria	Betaproteobacteria	Burkholderiales	Comamonadaceae	gi|160361034|gb|CP000884.1|	Delftia acidovorans SPH-1, complete genome	398578	3019031	3019570	540	100	0	94.81
Pcub_MSU1_v1_03638_0_4_1	1	1404	Pantholops hodgsonii	Eukaryota|Opisthokonta|Metazoa|Eumetazoa|Bilateria|Deuterostomia|Chordata|Craniata|Vertebrata|Gnathostomata|Teleostomi|Euteleostomi|Sarcopterygii|Dipnotetrapodomorpha|Tetrapoda|Amniota|Mammalia|Theria|Eutheria|Boreoeutheria|Laurasiatheria|Cetartiodactyla|Ruminantia|Pecora|Bovidae|Antilopinae|Pantholops|Pantholops hodgsonii	Eukaryota	Opisthokonta	Metazoa	Eumetazoa	Bilateria	gi|556724049|ref|XM_005957770.1|	PREDICTED: Pantholops hodgsonii putative dihydroxy-acid dehydratase, mitochondrial-like (LOC102338005), mRNA	59538	142	1545	1405	100	0	97.79
Pcub_MSU1_v1_03640_0_0_1	1	1419	Delftia acidovorans SPH-1	Bacteria|Proteobacteria|Betaproteobacteria|Burkholderiales|Comamonadaceae|Delftia|Delftia acidovorans|Delftia acidovorans SPH-1	Bacteria	Proteobacteria	Betaproteobacteria	Burkholderiales	Comamonadaceae	gi|160361034|gb|CP000884.1|	Delftia acidovorans SPH-1, complete genome	398578	3400446	3401864	1420	100	0	92.82
Pcub_MSU1_v1_03643_0_1_1	1	1314	Delftia acidovorans SPH-1	Bacteria|Proteobacteria|Betaproteobacteria|Burkholderiales|Comamonadaceae|Delftia|Delftia acidovorans|Delftia acidovorans SPH-1	Bacteria	Proteobacteria	Betaproteobacteria	Burkholderiales	Comamonadaceae	gi|160361034|gb|CP000884.1|	Delftia acidovorans SPH-1, complete genome	398578	656933	658246	1314	100	0	96.04
Pcub_MSU1_v1_03644_0_1_1	1	1041	Stenotrophomonas maltophilia D457	Bacteria|Proteobacteria|Gammaproteobacteria|Xanthomonadales|Xanthomonadaceae|Stenotrophomonas|Stenotrophomonas maltophilia group|Stenotrophomonas maltophilia|Stenotrophomonas maltophilia D457	Bacteria	Proteobacteria	Gammaproteobacteria	Xanthomonadales	Xanthomonadaceae	gi|384076029|emb|HE798556.1|	Stenotrophomonas maltophilia D457 complete genome	1163399	3686713	3685673	1041	100	0	97.02
Pcub_MSU1_v1_03645_0_0_1	1	1152	Stenotrophomonas maltophilia D457	Bacteria|Proteobacteria|Gammaproteobacteria|Xanthomonadales|Xanthomonadaceae|Stenotrophomonas|Stenotrophomonas maltophilia group|Stenotrophomonas maltophilia|Stenotrophomonas maltophilia D457	Bacteria	Proteobacteria	Gammaproteobacteria	Xanthomonadales	Xanthomonadaceae	gi|384076029|emb|HE798556.1|	Stenotrophomonas maltophilia D457 complete genome	1163399	3431788	3432939	1152	100	0	99.65
Pcub_MSU1_v1_03645_0_5_1	1	618	Stenotrophomonas maltophilia D457	Bacteria|Proteobacteria|Gammaproteobacteria|Xanthomonadales|Xanthomonadaceae|Stenotrophomonas|Stenotrophomonas maltophilia group|Stenotrophomonas maltophilia|Stenotrophomonas maltophilia D457	Bacteria	Proteobacteria	Gammaproteobacteria	Xanthomonadales	Xanthomonadaceae	gi|384076029|emb|HE798556.1|	Stenotrophomonas maltophilia D457 complete genome	1163399	3430736	3430119	618	100	0	99.19
Pcub_MSU1_v1_03647_0_0_1	1	1224	Delftia acidovorans SPH-1	Bacteria|Proteobacteria|Betaproteobacteria|Burkholderiales|Comamonadaceae|Delftia|Delftia acidovorans|Delftia acidovorans SPH-1	Bacteria	Proteobacteria	Betaproteobacteria	Burkholderiales	Comamonadaceae	gi|160361034|gb|CP000884.1|	Delftia acidovorans SPH-1, complete genome	398578	3117883	3116660	1224	100	0	98.69
Pcub_MSU1_v1_03647_0_1_1	1	786	Pantholops hodgsonii	Eukaryota|Opisthokonta|Metazoa|Eumetazoa|Bilateria|Deuterostomia|Chordata|Craniata|Vertebrata|Gnathostomata|Teleostomi|Euteleostomi|Sarcopterygii|Dipnotetrapodomorpha|Tetrapoda|Amniota|Mammalia|Theria|Eutheria|Boreoeutheria|Laurasiatheria|Cetartiodactyla|Ruminantia|Pecora|Bovidae|Antilopinae|Pantholops|Pantholops hodgsonii	Eukaryota	Opisthokonta	Metazoa	Eumetazoa	Bilateria	gi|556771521|ref|XM_005980875.1|	PREDICTED: Pantholops hodgsonii uncharacterized LOC102323545 (LOC102323545), mRNA	59538	91	876	786	100	0	99.87
Pcub_MSU1_v1_03648_0_1_1	1	429	Stenotrophomonas maltophilia	Bacteria|Proteobacteria|Gammaproteobacteria|Xanthomonadales|Xanthomonadaceae|Stenotrophomonas|Stenotrophomonas maltophilia group|Stenotrophomonas maltophilia	Bacteria	Proteobacteria	Gammaproteobacteria	Xanthomonadales	Xanthomonadaceae	gi|922679809|gb|CP011010.1|	Stenotrophomonas maltophilia strain ISMMS3, complete genome	40324	878606	879034	429	100	0	100
Pcub_MSU1_v1_03648_0_2_1	1	699	Stenotrophomonas maltophilia D457	Bacteria|Proteobacteria|Gammaproteobacteria|Xanthomonadales|Xanthomonadaceae|Stenotrophomonas|Stenotrophomonas maltophilia group|Stenotrophomonas maltophilia|Stenotrophomonas maltophilia D457	Bacteria	Proteobacteria	Gammaproteobacteria	Xanthomonadales	Xanthomonadaceae	gi|384076029|emb|HE798556.1|	Stenotrophomonas maltophilia D457 complete genome	1163399	884643	885341	699	100	0	99.57
Pcub_MSU1_v1_03649_0_1_1	1	2526	Delftia acidovorans SPH-1	Bacteria|Proteobacteria|Betaproteobacteria|Burkholderiales|Comamonadaceae|Delftia|Delftia acidovorans|Delftia acidovorans SPH-1	Bacteria	Proteobacteria	Betaproteobacteria	Burkholderiales	Comamonadaceae	gi|160361034|gb|CP000884.1|	Delftia acidovorans SPH-1, complete genome	398578	999164	996639	2526	100	0	97.74
Pcub_MSU1_v1_03653_0_4_1	1	1368	Delftia acidovorans SPH-1	Bacteria|Proteobacteria|Betaproteobacteria|Burkholderiales|Comamonadaceae|Delftia|Delftia acidovorans|Delftia acidovorans SPH-1	Bacteria	Proteobacteria	Betaproteobacteria	Burkholderiales	Comamonadaceae	gi|160361034|gb|CP000884.1|	Delftia acidovorans SPH-1, complete genome	398578	6392801	6391434	1368	100	0	97.44
Pcub_MSU1_v1_03657_0_1_1	1	1017	Stenotrophomonas maltophilia D457	Bacteria|Proteobacteria|Gammaproteobacteria|Xanthomonadales|Xanthomonadaceae|Stenotrophomonas|Stenotrophomonas maltophilia group|Stenotrophomonas maltophilia|Stenotrophomonas maltophilia D457	Bacteria	Proteobacteria	Gammaproteobacteria	Xanthomonadales	Xanthomonadaceae	gi|384076029|emb|HE798556.1|	Stenotrophomonas maltophilia D457 complete genome	1163399	4402091	4403107	1017	100	0	97.94
Pcub_MSU1_v1_03663_0_1_1	1	882	Delftia acidovorans SPH-1	Bacteria|Proteobacteria|Betaproteobacteria|Burkholderiales|Comamonadaceae|Delftia|Delftia acidovorans|Delftia acidovorans SPH-1	Bacteria	Proteobacteria	Betaproteobacteria	Burkholderiales	Comamonadaceae	gi|160361034|gb|CP000884.1|	Delftia acidovorans SPH-1, complete genome	398578	3646749	3647630	882	100	0	97.05
Pcub_MSU1_v1_03663_0_2_1	1	612	Delftia sp. Cs1-4	Bacteria|Proteobacteria|Betaproteobacteria|Burkholderiales|Comamonadaceae|Delftia|Delftia sp. Cs1-4	Bacteria	Proteobacteria	Betaproteobacteria	Burkholderiales	Comamonadaceae	gi|333741867|gb|CP002735.1|	Delftia sp. Cs1-4, complete genome	742013	3899456	3900067	612	100	0	98.04
Pcub_MSU1_v1_03672_0_0_1	1	693	Delftia sp. Cs1-4	Bacteria|Proteobacteria|Betaproteobacteria|Burkholderiales|Comamonadaceae|Delftia|Delftia sp. Cs1-4	Bacteria	Proteobacteria	Betaproteobacteria	Burkholderiales	Comamonadaceae	gi|333741867|gb|CP002735.1|	Delftia sp. Cs1-4, complete genome	742013	920573	919881	693	100	0	99.42
Pcub_MSU1_v1_03676_0_0_1	1	276	Delftia sp. Cs1-4	Bacteria|Proteobacteria|Betaproteobacteria|Burkholderiales|Comamonadaceae|Delftia|Delftia sp. Cs1-4	Bacteria	Proteobacteria	Betaproteobacteria	Burkholderiales	Comamonadaceae	gi|333741867|gb|CP002735.1|	Delftia sp. Cs1-4, complete genome	742013	4203583	4203858	276	100	4e-136	98.91
Pcub_MSU1_v1_03688_0_0_1	1	618	Delftia sp. Cs1-4	Bacteria|Proteobacteria|Betaproteobacteria|Burkholderiales|Comamonadaceae|Delftia|Delftia sp. Cs1-4	Bacteria	Proteobacteria	Betaproteobacteria	Burkholderiales	Comamonadaceae	gi|333741867|gb|CP002735.1|	Delftia sp. Cs1-4, complete genome	742013	3571721	3572338	618	100	0	98.38
Pcub_MSU1_v1_03688_0_6_1	1	2235	Delftia acidovorans SPH-1	Bacteria|Proteobacteria|Betaproteobacteria|Burkholderiales|Comamonadaceae|Delftia|Delftia acidovorans|Delftia acidovorans SPH-1	Bacteria	Proteobacteria	Betaproteobacteria	Burkholderiales	Comamonadaceae	gi|160361034|gb|CP000884.1|	Delftia acidovorans SPH-1, complete genome	398578	4005831	4008065	2235	100	0	97.05
Pcub_MSU1_v1_03690_0_1_1	1	612	Delftia acidovorans SPH-1	Bacteria|Proteobacteria|Betaproteobacteria|Burkholderiales|Comamonadaceae|Delftia|Delftia acidovorans|Delftia acidovorans SPH-1	Bacteria	Proteobacteria	Betaproteobacteria	Burkholderiales	Comamonadaceae	gi|160361034|gb|CP000884.1|	Delftia acidovorans SPH-1, complete genome	398578	4715277	4715888	612	100	0	99.18
Pcub_MSU1_v1_03698_0_0_1	1	2073	Stenotrophomonas maltophilia D457	Bacteria|Proteobacteria|Gammaproteobacteria|Xanthomonadales|Xanthomonadaceae|Stenotrophomonas|Stenotrophomonas maltophilia group|Stenotrophomonas maltophilia|Stenotrophomonas maltophilia D457	Bacteria	Proteobacteria	Gammaproteobacteria	Xanthomonadales	Xanthomonadaceae	gi|384076029|emb|HE798556.1|	Stenotrophomonas maltophilia D457 complete genome	1163399	2746332	2748404	2073	100	0	98.02
Pcub_MSU1_v1_03699_0_0_1	1	354	Stenotrophomonas maltophilia D457	Bacteria|Proteobacteria|Gammaproteobacteria|Xanthomonadales|Xanthomonadaceae|Stenotrophomonas|Stenotrophomonas maltophilia group|Stenotrophomonas maltophilia|Stenotrophomonas maltophilia D457	Bacteria	Proteobacteria	Gammaproteobacteria	Xanthomonadales	Xanthomonadaceae	gi|384076029|emb|HE798556.1|	Stenotrophomonas maltophilia D457 complete genome	1163399	783199	783552	354	100	0	99.44
Pcub_MSU1_v1_03700_0_1_1	1	234	Acinetobacter oleivorans DR1	Bacteria|Proteobacteria|Gammaproteobacteria|Pseudomonadales|Moraxellaceae|Acinetobacter|Acinetobacter oleivorans|Acinetobacter oleivorans DR1	Bacteria	Proteobacteria	Gammaproteobacteria	Pseudomonadales	Moraxellaceae	gi|298698338|gb|CP002080.1|	Acinetobacter oleivorans DR1, complete genome	436717	462491	462724	234	100	2e-114	99.15
Pcub_MSU1_v1_03700_0_2_1	1	498	Acinetobacter oleivorans DR1	Bacteria|Proteobacteria|Gammaproteobacteria|Pseudomonadales|Moraxellaceae|Acinetobacter|Acinetobacter oleivorans|Acinetobacter oleivorans DR1	Bacteria	Proteobacteria	Gammaproteobacteria	Pseudomonadales	Moraxellaceae	gi|298698338|gb|CP002080.1|	Acinetobacter oleivorans DR1, complete genome	436717	461807	462304	498	100	0	99.2
Pcub_MSU1_v1_03700_0_3_1	1	396	Acinetobacter baumannii	Bacteria|Proteobacteria|Gammaproteobacteria|Pseudomonadales|Moraxellaceae|Acinetobacter|Acinetobacter calcoaceticus/baumannii complex|Acinetobacter baumannii	Bacteria	Proteobacteria	Gammaproteobacteria	Pseudomonadales	Moraxellaceae	gi|742926533|gb|CP010368.1|	Acinetobacter baumannii strain 6411, complete genome	470	474560	474955	396	100	0	98.74
Pcub_MSU1_v1_03700_0_5_1	1	537	Acinetobacter oleivorans DR1	Bacteria|Proteobacteria|Gammaproteobacteria|Pseudomonadales|Moraxellaceae|Acinetobacter|Acinetobacter oleivorans|Acinetobacter oleivorans DR1	Bacteria	Proteobacteria	Gammaproteobacteria	Pseudomonadales	Moraxellaceae	gi|298698338|gb|CP002080.1|	Acinetobacter oleivorans DR1, complete genome	436717	459634	460170	537	100	0	97.77
Pcub_MSU1_v1_03704_0_0_1	1	537	Pseudomonas fulva 12-X	Bacteria|Proteobacteria|Gammaproteobacteria|Pseudomonadales|Pseudomonadaceae|Pseudomonas|Pseudomonas putida group|Pseudomonas fulva|Pseudomonas fulva 12-X	Bacteria	Proteobacteria	Gammaproteobacteria	Pseudomonadales	Pseudomonadaceae	gi|333113473|gb|CP002727.1|	Pseudomonas fulva 12-X, complete genome	743720	4904645	4904109	537	100	0	98.32
Pcub_MSU1_v1_03707_0_1_1	1	1008	Delftia acidovorans SPH-1	Bacteria|Proteobacteria|Betaproteobacteria|Burkholderiales|Comamonadaceae|Delftia|Delftia acidovorans|Delftia acidovorans SPH-1	Bacteria	Proteobacteria	Betaproteobacteria	Burkholderiales	Comamonadaceae	gi|160361034|gb|CP000884.1|	Delftia acidovorans SPH-1, complete genome	398578	5194064	5193057	1008	100	0	95.54
Pcub_MSU1_v1_03719_0_2_1	1	1518	Stenotrophomonas maltophilia D457	Bacteria|Proteobacteria|Gammaproteobacteria|Xanthomonadales|Xanthomonadaceae|Stenotrophomonas|Stenotrophomonas maltophilia group|Stenotrophomonas maltophilia|Stenotrophomonas maltophilia D457	Bacteria	Proteobacteria	Gammaproteobacteria	Xanthomonadales	Xanthomonadaceae	gi|384076029|emb|HE798556.1|	Stenotrophomonas maltophilia D457 complete genome	1163399	1525812	1527329	1518	100	0	98.02
Pcub_MSU1_v1_03723_0_1_1	1	681	Delftia sp. Cs1-4	Bacteria|Proteobacteria|Betaproteobacteria|Burkholderiales|Comamonadaceae|Delftia|Delftia sp. Cs1-4	Bacteria	Proteobacteria	Betaproteobacteria	Burkholderiales	Comamonadaceae	gi|333741867|gb|CP002735.1|	Delftia sp. Cs1-4, complete genome	742013	2612473	2611793	681	100	0	97.21
Pcub_MSU1_v1_03723_0_2_1	1	1083	Delftia acidovorans SPH-1	Bacteria|Proteobacteria|Betaproteobacteria|Burkholderiales|Comamonadaceae|Delftia|Delftia acidovorans|Delftia acidovorans SPH-1	Bacteria	Proteobacteria	Betaproteobacteria	Burkholderiales	Comamonadaceae	gi|160361034|gb|CP000884.1|	Delftia acidovorans SPH-1, complete genome	398578	4987922	4986840	1083	100	0	97.41
Pcub_MSU1_v1_03725_0_0_1	1	966	Delftia sp. Cs1-4	Bacteria|Proteobacteria|Betaproteobacteria|Burkholderiales|Comamonadaceae|Delftia|Delftia sp. Cs1-4	Bacteria	Proteobacteria	Betaproteobacteria	Burkholderiales	Comamonadaceae	gi|333741867|gb|CP002735.1|	Delftia sp. Cs1-4, complete genome	742013	220221	219256	966	100	0	98.45
Pcub_MSU1_v1_03731_0_1_1	1	807	Delftia sp. Cs1-4	Bacteria|Proteobacteria|Betaproteobacteria|Burkholderiales|Comamonadaceae|Delftia|Delftia sp. Cs1-4	Bacteria	Proteobacteria	Betaproteobacteria	Burkholderiales	Comamonadaceae	gi|333741867|gb|CP002735.1|	Delftia sp. Cs1-4, complete genome	742013	4779406	4778600	807	100	0	99.38
Pcub_MSU1_v1_03731_0_2_1	1	987	Delftia acidovorans SPH-1	Bacteria|Proteobacteria|Betaproteobacteria|Burkholderiales|Comamonadaceae|Delftia|Delftia acidovorans|Delftia acidovorans SPH-1	Bacteria	Proteobacteria	Betaproteobacteria	Burkholderiales	Comamonadaceae	gi|160361034|gb|CP000884.1|	Delftia acidovorans SPH-1, complete genome	398578	2683756	2684742	987	100	0	99.19
Pcub_MSU1_v1_03735_0_1_1	1	180	Stenotrophomonas maltophilia R551-3	Bacteria|Proteobacteria|Gammaproteobacteria|Xanthomonadales|Xanthomonadaceae|Stenotrophomonas|Stenotrophomonas maltophilia group|Stenotrophomonas maltophilia|Stenotrophomonas maltophilia R551-3	Bacteria	Proteobacteria	Gammaproteobacteria	Xanthomonadales	Xanthomonadaceae	gi|194346582|gb|CP001111.1|	Stenotrophomonas maltophilia R551-3, complete genome	391008	4188757	4188578	180	100	3e-61	91.11
Pcub_MSU1_v1_03737_0_0_1	1	441	Ricinus communis	Eukaryota|Viridiplantae|Streptophyta|Streptophytina|Embryophyta|Tracheophyta|Euphyllophyta|Spermatophyta|Magnoliophyta|Mesangiospermae|eudicotyledons|Gunneridae|Pentapetalae|rosids|fabids|Malpighiales|Euphorbiaceae|Acalyphoideae|Acalypheae|Ricinus|Ricinus communis	Eukaryota	Viridiplantae	Streptophyta	Streptophytina	Embryophyta	gi|255603991|ref|XM_002538104.1|	Ricinus communis conserved hypothetical protein, mRNA	3988	265	705	441	100	0	97.96
Pcub_MSU1_v1_03737_0_2_1	1	711	Delftia sp. Cs1-4	Bacteria|Proteobacteria|Betaproteobacteria|Burkholderiales|Comamonadaceae|Delftia|Delftia sp. Cs1-4	Bacteria	Proteobacteria	Betaproteobacteria	Burkholderiales	Comamonadaceae	gi|333741867|gb|CP002735.1|	Delftia sp. Cs1-4, complete genome	742013	5286492	5285782	711	100	0	98.87
Pcub_MSU1_v1_03741_0_2_1	1	1356	Acinetobacter oleivorans DR1	Bacteria|Proteobacteria|Gammaproteobacteria|Pseudomonadales|Moraxellaceae|Acinetobacter|Acinetobacter oleivorans|Acinetobacter oleivorans DR1	Bacteria	Proteobacteria	Gammaproteobacteria	Pseudomonadales	Moraxellaceae	gi|298698338|gb|CP002080.1|	Acinetobacter oleivorans DR1, complete genome	436717	1802701	1804059	1360	100	0	92.5
Pcub_MSU1_v1_03756_0_1_1	1	1458	Delftia acidovorans SPH-1	Bacteria|Proteobacteria|Betaproteobacteria|Burkholderiales|Comamonadaceae|Delftia|Delftia acidovorans|Delftia acidovorans SPH-1	Bacteria	Proteobacteria	Betaproteobacteria	Burkholderiales	Comamonadaceae	gi|160361034|gb|CP000884.1|	Delftia acidovorans SPH-1, complete genome	398578	5595069	5596526	1458	100	0	95.68
Pcub_MSU1_v1_03757_0_0_1	1	909	Stenotrophomonas maltophilia D457	Bacteria|Proteobacteria|Gammaproteobacteria|Xanthomonadales|Xanthomonadaceae|Stenotrophomonas|Stenotrophomonas maltophilia group|Stenotrophomonas maltophilia|Stenotrophomonas maltophilia D457	Bacteria	Proteobacteria	Gammaproteobacteria	Xanthomonadales	Xanthomonadaceae	gi|384076029|emb|HE798556.1|	Stenotrophomonas maltophilia D457 complete genome	1163399	432094	431186	909	100	0	99.23
Pcub_MSU1_v1_03762_0_2_1	1	600	Delftia acidovorans SPH-1	Bacteria|Proteobacteria|Betaproteobacteria|Burkholderiales|Comamonadaceae|Delftia|Delftia acidovorans|Delftia acidovorans SPH-1	Bacteria	Proteobacteria	Betaproteobacteria	Burkholderiales	Comamonadaceae	gi|160361034|gb|CP000884.1|	Delftia acidovorans SPH-1, complete genome	398578	5207240	5207839	600	100	0	97.33
Pcub_MSU1_v1_03762_0_3_1	1	519	Delftia sp. Cs1-4	Bacteria|Proteobacteria|Betaproteobacteria|Burkholderiales|Comamonadaceae|Delftia|Delftia sp. Cs1-4	Bacteria	Proteobacteria	Betaproteobacteria	Burkholderiales	Comamonadaceae	gi|333741867|gb|CP002735.1|	Delftia sp. Cs1-4, complete genome	742013	2424516	2423998	519	100	0	98.65
Pcub_MSU1_v1_03762_0_4_1	1	1299	Delftia sp. Cs1-4	Bacteria|Proteobacteria|Betaproteobacteria|Burkholderiales|Comamonadaceae|Delftia|Delftia sp. Cs1-4	Bacteria	Proteobacteria	Betaproteobacteria	Burkholderiales	Comamonadaceae	gi|333741867|gb|CP002735.1|	Delftia sp. Cs1-4, complete genome	742013	2423986	2422688	1299	100	0	98
Pcub_MSU1_v1_03764_0_1_1	1	1437	Delftia sp. Cs1-4	Bacteria|Proteobacteria|Betaproteobacteria|Burkholderiales|Comamonadaceae|Delftia|Delftia sp. Cs1-4	Bacteria	Proteobacteria	Betaproteobacteria	Burkholderiales	Comamonadaceae	gi|333741867|gb|CP002735.1|	Delftia sp. Cs1-4, complete genome	742013	1593854	1595290	1437	100	0	93.53
Pcub_MSU1_v1_03764_0_2_1	1	579	Pantholops hodgsonii	Eukaryota|Opisthokonta|Metazoa|Eumetazoa|Bilateria|Deuterostomia|Chordata|Craniata|Vertebrata|Gnathostomata|Teleostomi|Euteleostomi|Sarcopterygii|Dipnotetrapodomorpha|Tetrapoda|Amniota|Mammalia|Theria|Eutheria|Boreoeutheria|Laurasiatheria|Cetartiodactyla|Ruminantia|Pecora|Bovidae|Antilopinae|Pantholops|Pantholops hodgsonii	Eukaryota	Opisthokonta	Metazoa	Eumetazoa	Bilateria	gi|556740202|ref|XM_005965586.1|	PREDICTED: Pantholops hodgsonii chaperone protein ClpB3, chloroplastic-like (LOC102341985), mRNA	59538	2034	2612	579	100	0	99.65
Pcub_MSU1_v1_03767_0_0_1	1	1473	Delftia acidovorans SPH-1	Bacteria|Proteobacteria|Betaproteobacteria|Burkholderiales|Comamonadaceae|Delftia|Delftia acidovorans|Delftia acidovorans SPH-1	Bacteria	Proteobacteria	Betaproteobacteria	Burkholderiales	Comamonadaceae	gi|160361034|gb|CP000884.1|	Delftia acidovorans SPH-1, complete genome	398578	5989517	5988045	1473	100	0	96.27
Pcub_MSU1_v1_03769_0_2_1	1	918	Pantholops hodgsonii	Eukaryota|Opisthokonta|Metazoa|Eumetazoa|Bilateria|Deuterostomia|Chordata|Craniata|Vertebrata|Gnathostomata|Teleostomi|Euteleostomi|Sarcopterygii|Dipnotetrapodomorpha|Tetrapoda|Amniota|Mammalia|Theria|Eutheria|Boreoeutheria|Laurasiatheria|Cetartiodactyla|Ruminantia|Pecora|Bovidae|Antilopinae|Pantholops|Pantholops hodgsonii	Eukaryota	Opisthokonta	Metazoa	Eumetazoa	Bilateria	gi|556763787|ref|XM_005977113.1|	PREDICTED: Pantholops hodgsonii stomatin-like protein 2, mitochondrial-like (LOC102344293), mRNA	59538	1	918	918	100	0	99.56
Pcub_MSU1_v1_03772_0_1_1	1	1383	Delftia acidovorans SPH-1	Bacteria|Proteobacteria|Betaproteobacteria|Burkholderiales|Comamonadaceae|Delftia|Delftia acidovorans|Delftia acidovorans SPH-1	Bacteria	Proteobacteria	Betaproteobacteria	Burkholderiales	Comamonadaceae	gi|160361034|gb|CP000884.1|	Delftia acidovorans SPH-1, complete genome	398578	1609008	1607626	1383	100	0	99.06
Pcub_MSU1_v1_03772_0_2_1	1	699	Delftia acidovorans SPH-1	Bacteria|Proteobacteria|Betaproteobacteria|Burkholderiales|Comamonadaceae|Delftia|Delftia acidovorans|Delftia acidovorans SPH-1	Bacteria	Proteobacteria	Betaproteobacteria	Burkholderiales	Comamonadaceae	gi|160361034|gb|CP000884.1|	Delftia acidovorans SPH-1, complete genome	398578	1606584	1605886	699	100	0	98.57
Pcub_MSU1_v1_03778_0_6_1	1	747	Acidovorax avenae subsp. avenae ATCC 19860	Bacteria|Proteobacteria|Betaproteobacteria|Burkholderiales|Comamonadaceae|Acidovorax|Acidovorax avenae|Acidovorax avenae subsp. avenae|Acidovorax avenae subsp. avenae ATCC 19860	Bacteria	Proteobacteria	Betaproteobacteria	Burkholderiales	Comamonadaceae	gi|323371659|gb|CP002521.1|	Acidovorax avenae subsp. avenae ATCC 19860, complete genome	643561	5154223	5153477	747	100	0	93.57
Pcub_MSU1_v1_03786_0_0_1	1	849	Delftia sp. Cs1-4	Bacteria|Proteobacteria|Betaproteobacteria|Burkholderiales|Comamonadaceae|Delftia|Delftia sp. Cs1-4	Bacteria	Proteobacteria	Betaproteobacteria	Burkholderiales	Comamonadaceae	gi|333741867|gb|CP002735.1|	Delftia sp. Cs1-4, complete genome	742013	6136485	6135637	849	100	0	98.23
Pcub_MSU1_v1_03788_0_0_1	1	555	Delftia sp. Cs1-4	Bacteria|Proteobacteria|Betaproteobacteria|Burkholderiales|Comamonadaceae|Delftia|Delftia sp. Cs1-4	Bacteria	Proteobacteria	Betaproteobacteria	Burkholderiales	Comamonadaceae	gi|333741867|gb|CP002735.1|	Delftia sp. Cs1-4, complete genome	742013	5147207	5146653	555	100	0	96.22
Pcub_MSU1_v1_03788_0_1_1	1	915	Delftia acidovorans SPH-1	Bacteria|Proteobacteria|Betaproteobacteria|Burkholderiales|Comamonadaceae|Delftia|Delftia acidovorans|Delftia acidovorans SPH-1	Bacteria	Proteobacteria	Betaproteobacteria	Burkholderiales	Comamonadaceae	gi|160361034|gb|CP000884.1|	Delftia acidovorans SPH-1, complete genome	398578	2329480	2330404	927	100	0	94.5
Pcub_MSU1_v1_03796_0_1_1	1	729	Delftia sp. Cs1-4	Bacteria|Proteobacteria|Betaproteobacteria|Burkholderiales|Comamonadaceae|Delftia|Delftia sp. Cs1-4	Bacteria	Proteobacteria	Betaproteobacteria	Burkholderiales	Comamonadaceae	gi|333741867|gb|CP002735.1|	Delftia sp. Cs1-4, complete genome	742013	2283134	2283862	732	100	0	92.9
Pcub_MSU1_v1_03796_0_2_1	1	1059	Delftia acidovorans SPH-1	Bacteria|Proteobacteria|Betaproteobacteria|Burkholderiales|Comamonadaceae|Delftia|Delftia acidovorans|Delftia acidovorans SPH-1	Bacteria	Proteobacteria	Betaproteobacteria	Burkholderiales	Comamonadaceae	gi|160361034|gb|CP000884.1|	Delftia acidovorans SPH-1, complete genome	398578	5341138	5340080	1059	100	0	90.08
Pcub_MSU1_v1_03809_0_0_1	1	651	Stenotrophomonas maltophilia D457	Bacteria|Proteobacteria|Gammaproteobacteria|Xanthomonadales|Xanthomonadaceae|Stenotrophomonas|Stenotrophomonas maltophilia group|Stenotrophomonas maltophilia|Stenotrophomonas maltophilia D457	Bacteria	Proteobacteria	Gammaproteobacteria	Xanthomonadales	Xanthomonadaceae	gi|384076029|emb|HE798556.1|	Stenotrophomonas maltophilia D457 complete genome	1163399	4020709	4021359	651	100	0	99.08
Pcub_MSU1_v1_03809_0_3_1	1	1083	Stenotrophomonas maltophilia D457	Bacteria|Proteobacteria|Gammaproteobacteria|Xanthomonadales|Xanthomonadaceae|Stenotrophomonas|Stenotrophomonas maltophilia group|Stenotrophomonas maltophilia|Stenotrophomonas maltophilia D457	Bacteria	Proteobacteria	Gammaproteobacteria	Xanthomonadales	Xanthomonadaceae	gi|384076029|emb|HE798556.1|	Stenotrophomonas maltophilia D457 complete genome	1163399	4017882	4018968	1088	100	0	94.85
Pcub_MSU1_v1_03813_0_0_1	1	2202	Delftia sp. Cs1-4	Bacteria|Proteobacteria|Betaproteobacteria|Burkholderiales|Comamonadaceae|Delftia|Delftia sp. Cs1-4	Bacteria	Proteobacteria	Betaproteobacteria	Burkholderiales	Comamonadaceae	gi|333741867|gb|CP002735.1|	Delftia sp. Cs1-4, complete genome	742013	856221	858462	2242	100	0	97.1
Pcub_MSU1_v1_03824_0_0_1	1	720	Delftia sp. Cs1-4	Bacteria|Proteobacteria|Betaproteobacteria|Burkholderiales|Comamonadaceae|Delftia|Delftia sp. Cs1-4	Bacteria	Proteobacteria	Betaproteobacteria	Burkholderiales	Comamonadaceae	gi|333741867|gb|CP002735.1|	Delftia sp. Cs1-4, complete genome	742013	4486439	4487158	720	100	0	95.83
Pcub_MSU1_v1_03824_0_1_1	1	1041	Delftia sp. Cs1-4	Bacteria|Proteobacteria|Betaproteobacteria|Burkholderiales|Comamonadaceae|Delftia|Delftia sp. Cs1-4	Bacteria	Proteobacteria	Betaproteobacteria	Burkholderiales	Comamonadaceae	gi|333741867|gb|CP002735.1|	Delftia sp. Cs1-4, complete genome	742013	4486276	4485236	1041	100	0	94.33
Pcub_MSU1_v1_03843_0_1_1	1	528	Delftia acidovorans SPH-1	Bacteria|Proteobacteria|Betaproteobacteria|Burkholderiales|Comamonadaceae|Delftia|Delftia acidovorans|Delftia acidovorans SPH-1	Bacteria	Proteobacteria	Betaproteobacteria	Burkholderiales	Comamonadaceae	gi|160361034|gb|CP000884.1|	Delftia acidovorans SPH-1, complete genome	398578	5827422	5826895	528	100	0	95.64
Pcub_MSU1_v1_03843_0_4_1	1	1494	Delftia acidovorans SPH-1	Bacteria|Proteobacteria|Betaproteobacteria|Burkholderiales|Comamonadaceae|Delftia|Delftia acidovorans|Delftia acidovorans SPH-1	Bacteria	Proteobacteria	Betaproteobacteria	Burkholderiales	Comamonadaceae	gi|160361034|gb|CP000884.1|	Delftia acidovorans SPH-1, complete genome	398578	5828981	5827450	1532	100	0	93.73
Pcub_MSU1_v1_03852_0_1_1	1	2556	Stenotrophomonas acidaminiphila	Bacteria|Proteobacteria|Gammaproteobacteria|Xanthomonadales|Xanthomonadaceae|Stenotrophomonas|Stenotrophomonas acidaminiphila	Bacteria	Proteobacteria	Gammaproteobacteria	Xanthomonadales	Xanthomonadaceae	gi|938169631|gb|CP012900.1|	Stenotrophomonas acidaminiphila strain ZAC14D2_NAIMI4_2, complete genome	128780	2019227	2021782	2556	100	0	96.05
Pcub_MSU1_v1_03856_0_0_1	1	1047	Stenotrophomonas maltophilia D457	Bacteria|Proteobacteria|Gammaproteobacteria|Xanthomonadales|Xanthomonadaceae|Stenotrophomonas|Stenotrophomonas maltophilia group|Stenotrophomonas maltophilia|Stenotrophomonas maltophilia D457	Bacteria	Proteobacteria	Gammaproteobacteria	Xanthomonadales	Xanthomonadaceae	gi|384076029|emb|HE798556.1|	Stenotrophomonas maltophilia D457 complete genome	1163399	3779779	3778733	1047	100	0	98.09
Pcub_MSU1_v1_03857_0_0_1	1	879	Delftia sp. Cs1-4	Bacteria|Proteobacteria|Betaproteobacteria|Burkholderiales|Comamonadaceae|Delftia|Delftia sp. Cs1-4	Bacteria	Proteobacteria	Betaproteobacteria	Burkholderiales	Comamonadaceae	gi|333741867|gb|CP002735.1|	Delftia sp. Cs1-4, complete genome	742013	3735067	3734189	879	100	0	96.02
Pcub_MSU1_v1_03864_0_1_1	1	549	Delftia acidovorans SPH-1	Bacteria|Proteobacteria|Betaproteobacteria|Burkholderiales|Comamonadaceae|Delftia|Delftia acidovorans|Delftia acidovorans SPH-1	Bacteria	Proteobacteria	Betaproteobacteria	Burkholderiales	Comamonadaceae	gi|160361034|gb|CP000884.1|	Delftia acidovorans SPH-1, complete genome	398578	5622021	5622569	549	100	0	98.91
Pcub_MSU1_v1_03873_0_0_1	1	417	Pantholops hodgsonii	Eukaryota|Opisthokonta|Metazoa|Eumetazoa|Bilateria|Deuterostomia|Chordata|Craniata|Vertebrata|Gnathostomata|Teleostomi|Euteleostomi|Sarcopterygii|Dipnotetrapodomorpha|Tetrapoda|Amniota|Mammalia|Theria|Eutheria|Boreoeutheria|Laurasiatheria|Cetartiodactyla|Ruminantia|Pecora|Bovidae|Antilopinae|Pantholops|Pantholops hodgsonii	Eukaryota	Opisthokonta	Metazoa	Eumetazoa	Bilateria	gi|556751968|ref|XM_005971320.1|	PREDICTED: Pantholops hodgsonii ATP synthase epsilon chain, chloroplastic-like (LOC102320082), mRNA	59538	1	417	417	100	0	100
Pcub_MSU1_v1_03890_0_1_1	1	987	Delftia acidovorans SPH-1	Bacteria|Proteobacteria|Betaproteobacteria|Burkholderiales|Comamonadaceae|Delftia|Delftia acidovorans|Delftia acidovorans SPH-1	Bacteria	Proteobacteria	Betaproteobacteria	Burkholderiales	Comamonadaceae	gi|160361034|gb|CP000884.1|	Delftia acidovorans SPH-1, complete genome	398578	6245802	6244816	987	100	0	99.19
Pcub_MSU1_v1_03890_0_4_1	1	1107	Delftia sp. Cs1-4	Bacteria|Proteobacteria|Betaproteobacteria|Burkholderiales|Comamonadaceae|Delftia|Delftia sp. Cs1-4	Bacteria	Proteobacteria	Betaproteobacteria	Burkholderiales	Comamonadaceae	gi|333741867|gb|CP002735.1|	Delftia sp. Cs1-4, complete genome	742013	1123401	1122295	1107	100	0	98.64
Pcub_MSU1_v1_03891_0_0_1	1	1920	Delftia acidovorans SPH-1	Bacteria|Proteobacteria|Betaproteobacteria|Burkholderiales|Comamonadaceae|Delftia|Delftia acidovorans|Delftia acidovorans SPH-1	Bacteria	Proteobacteria	Betaproteobacteria	Burkholderiales	Comamonadaceae	gi|160361034|gb|CP000884.1|	Delftia acidovorans SPH-1, complete genome	398578	5911103	5913022	1920	100	0	97.6
Pcub_MSU1_v1_03894_0_0_1	1	1587	Delftia acidovorans SPH-1	Bacteria|Proteobacteria|Betaproteobacteria|Burkholderiales|Comamonadaceae|Delftia|Delftia acidovorans|Delftia acidovorans SPH-1	Bacteria	Proteobacteria	Betaproteobacteria	Burkholderiales	Comamonadaceae	gi|160361034|gb|CP000884.1|	Delftia acidovorans SPH-1, complete genome	398578	6766129	6764540	1590	100	0	96.67
Pcub_MSU1_v1_03899_0_2_1	1	1791	Pseudoxanthomonas suwonensis	Bacteria|Proteobacteria|Gammaproteobacteria|Xanthomonadales|Xanthomonadaceae|Pseudoxanthomonas|Pseudoxanthomonas suwonensis	Bacteria	Proteobacteria	Gammaproteobacteria	Xanthomonadales	Xanthomonadaceae	gi|807383831|gb|CP011144.1|	Pseudoxanthomonas suwonensis strain J1, complete genome	314722	201359	199569	1793	100	0	91.91
Pcub_MSU1_v1_03900_0_0_1	1	2124	Delftia sp. Cs1-4	Bacteria|Proteobacteria|Betaproteobacteria|Burkholderiales|Comamonadaceae|Delftia|Delftia sp. Cs1-4	Bacteria	Proteobacteria	Betaproteobacteria	Burkholderiales	Comamonadaceae	gi|333741867|gb|CP002735.1|	Delftia sp. Cs1-4, complete genome	742013	2487546	2485394	2154	100	0	94.94
Pcub_MSU1_v1_03908_0_0_1	1	900	Stenotrophomonas maltophilia D457	Bacteria|Proteobacteria|Gammaproteobacteria|Xanthomonadales|Xanthomonadaceae|Stenotrophomonas|Stenotrophomonas maltophilia group|Stenotrophomonas maltophilia|Stenotrophomonas maltophilia D457	Bacteria	Proteobacteria	Gammaproteobacteria	Xanthomonadales	Xanthomonadaceae	gi|384076029|emb|HE798556.1|	Stenotrophomonas maltophilia D457 complete genome	1163399	1809037	1809936	900	100	0	92.56
Pcub_MSU1_v1_03926_0_1_1	1	1590	Delftia acidovorans SPH-1	Bacteria|Proteobacteria|Betaproteobacteria|Burkholderiales|Comamonadaceae|Delftia|Delftia acidovorans|Delftia acidovorans SPH-1	Bacteria	Proteobacteria	Betaproteobacteria	Burkholderiales	Comamonadaceae	gi|160361034|gb|CP000884.1|	Delftia acidovorans SPH-1, complete genome	398578	1148029	1149618	1590	100	0	96.42
Pcub_MSU1_v1_03926_0_2_1	1	369	Pantholops hodgsonii	Eukaryota|Opisthokonta|Metazoa|Eumetazoa|Bilateria|Deuterostomia|Chordata|Craniata|Vertebrata|Gnathostomata|Teleostomi|Euteleostomi|Sarcopterygii|Dipnotetrapodomorpha|Tetrapoda|Amniota|Mammalia|Theria|Eutheria|Boreoeutheria|Laurasiatheria|Cetartiodactyla|Ruminantia|Pecora|Bovidae|Antilopinae|Pantholops|Pantholops hodgsonii	Eukaryota	Opisthokonta	Metazoa	Eumetazoa	Bilateria	gi|556764672|ref|XM_005977543.1|	PREDICTED: Pantholops hodgsonii 60S ribosomal protein L14, mitochondrial-like (LOC102338255), mRNA	59538	1	369	369	100	0	100
Pcub_MSU1_v1_03934_0_1_1	1	1392	Pseudomonas putida BIRD-1	Bacteria|Proteobacteria|Gammaproteobacteria|Pseudomonadales|Pseudomonadaceae|Pseudomonas|Pseudomonas putida group|Pseudomonas putida|Pseudomonas putida BIRD-1	Bacteria	Proteobacteria	Gammaproteobacteria	Pseudomonadales	Pseudomonadaceae	gi|313496345|gb|CP002290.1|	Pseudomonas putida BIRD-1, complete genome	931281	52238	50847	1392	100	0	100
Pcub_MSU1_v1_03934_0_2_1	1	849	Pseudomonas putida BIRD-1	Bacteria|Proteobacteria|Gammaproteobacteria|Pseudomonadales|Pseudomonadaceae|Pseudomonas|Pseudomonas putida group|Pseudomonas putida|Pseudomonas putida BIRD-1	Bacteria	Proteobacteria	Gammaproteobacteria	Pseudomonadales	Pseudomonadaceae	gi|313496345|gb|CP002290.1|	Pseudomonas putida BIRD-1, complete genome	931281	50723	49875	849	100	0	100
Pcub_MSU1_v1_03946_0_0_1	1	519	Delftia sp. Cs1-4	Bacteria|Proteobacteria|Betaproteobacteria|Burkholderiales|Comamonadaceae|Delftia|Delftia sp. Cs1-4	Bacteria	Proteobacteria	Betaproteobacteria	Burkholderiales	Comamonadaceae	gi|333741867|gb|CP002735.1|	Delftia sp. Cs1-4, complete genome	742013	1201781	1202299	519	100	0	98.27
Pcub_MSU1_v1_03949_0_0_1	1	1458	Delftia sp. Cs1-4	Bacteria|Proteobacteria|Betaproteobacteria|Burkholderiales|Comamonadaceae|Delftia|Delftia sp. Cs1-4	Bacteria	Proteobacteria	Betaproteobacteria	Burkholderiales	Comamonadaceae	gi|333741867|gb|CP002735.1|	Delftia sp. Cs1-4, complete genome	742013	5165665	5167122	1458	100	0	99.59
Pcub_MSU1_v1_03949_0_5_1	1	1284	Pantholops hodgsonii	Eukaryota|Opisthokonta|Metazoa|Eumetazoa|Bilateria|Deuterostomia|Chordata|Craniata|Vertebrata|Gnathostomata|Teleostomi|Euteleostomi|Sarcopterygii|Dipnotetrapodomorpha|Tetrapoda|Amniota|Mammalia|Theria|Eutheria|Boreoeutheria|Laurasiatheria|Cetartiodactyla|Ruminantia|Pecora|Bovidae|Antilopinae|Pantholops|Pantholops hodgsonii	Eukaryota	Opisthokonta	Metazoa	Eumetazoa	Bilateria	gi|556720196|ref|XM_005955910.1|	PREDICTED: Pantholops hodgsonii aminoacylase-1A-like (LOC102330778), mRNA	59538	10	1293	1284	100	0	98.52
Pcub_MSU1_v1_03951_0_0_1	1	1167	Delftia sp. Cs1-4	Bacteria|Proteobacteria|Betaproteobacteria|Burkholderiales|Comamonadaceae|Delftia|Delftia sp. Cs1-4	Bacteria	Proteobacteria	Betaproteobacteria	Burkholderiales	Comamonadaceae	gi|333741867|gb|CP002735.1|	Delftia sp. Cs1-4, complete genome	742013	226109	227275	1167	100	0	98.89
Pcub_MSU1_v1_03970_0_1_1	1	1164	Delftia sp. Cs1-4	Bacteria|Proteobacteria|Betaproteobacteria|Burkholderiales|Comamonadaceae|Delftia|Delftia sp. Cs1-4	Bacteria	Proteobacteria	Betaproteobacteria	Burkholderiales	Comamonadaceae	gi|333741867|gb|CP002735.1|	Delftia sp. Cs1-4, complete genome	742013	6673528	6672365	1164	100	0	94.33
Pcub_MSU1_v1_03970_0_2_1	1	393	Delftia sp. Cs1-4	Bacteria|Proteobacteria|Betaproteobacteria|Burkholderiales|Comamonadaceae|Delftia|Delftia sp. Cs1-4	Bacteria	Proteobacteria	Betaproteobacteria	Burkholderiales	Comamonadaceae	gi|333741867|gb|CP002735.1|	Delftia sp. Cs1-4, complete genome	742013	6674599	6674991	393	100	0	98.22
Pcub_MSU1_v1_03975_0_0_1	1	960	Stenotrophomonas maltophilia	Bacteria|Proteobacteria|Gammaproteobacteria|Xanthomonadales|Xanthomonadaceae|Stenotrophomonas|Stenotrophomonas maltophilia group|Stenotrophomonas maltophilia	Bacteria	Proteobacteria	Gammaproteobacteria	Xanthomonadales	Xanthomonadaceae	gi|922795094|gb|CP011305.1|	Stenotrophomonas maltophilia strain ISMMS2, complete genome	40324	3378331	3377372	960	100	0	96.35
Pcub_MSU1_v1_03982_0_0_1	1	738	Stenotrophomonas maltophilia D457	Bacteria|Proteobacteria|Gammaproteobacteria|Xanthomonadales|Xanthomonadaceae|Stenotrophomonas|Stenotrophomonas maltophilia group|Stenotrophomonas maltophilia|Stenotrophomonas maltophilia D457	Bacteria	Proteobacteria	Gammaproteobacteria	Xanthomonadales	Xanthomonadaceae	gi|384076029|emb|HE798556.1|	Stenotrophomonas maltophilia D457 complete genome	1163399	1122944	1123681	738	100	0	93.9
Pcub_MSU1_v1_03985_0_0_1	1	1104	Delftia acidovorans SPH-1	Bacteria|Proteobacteria|Betaproteobacteria|Burkholderiales|Comamonadaceae|Delftia|Delftia acidovorans|Delftia acidovorans SPH-1	Bacteria	Proteobacteria	Betaproteobacteria	Burkholderiales	Comamonadaceae	gi|160361034|gb|CP000884.1|	Delftia acidovorans SPH-1, complete genome	398578	1378167	1379270	1104	100	0	98.73
Pcub_MSU1_v1_03990_0_1_1	1	1527	Acidovorax citrulli AAC00-1	Bacteria|Proteobacteria|Betaproteobacteria|Burkholderiales|Comamonadaceae|Acidovorax|Acidovorax citrulli|Acidovorax citrulli AAC00-1	Bacteria	Proteobacteria	Betaproteobacteria	Burkholderiales	Comamonadaceae	gi|120587178|gb|CP000512.1|	Acidovorax citrulli AAC00-1, complete genome	397945	5293301	5294818	1528	100	0	91.49
Pcub_MSU1_v1_03991_0_3_1	1	876	Delftia sp. Cs1-4	Bacteria|Proteobacteria|Betaproteobacteria|Burkholderiales|Comamonadaceae|Delftia|Delftia sp. Cs1-4	Bacteria	Proteobacteria	Betaproteobacteria	Burkholderiales	Comamonadaceae	gi|333741867|gb|CP002735.1|	Delftia sp. Cs1-4, complete genome	742013	767952	768815	876	100	0	94.98
Pcub_MSU1_v1_03992_0_1_1	1	1092	Stenotrophomonas maltophilia D457	Bacteria|Proteobacteria|Gammaproteobacteria|Xanthomonadales|Xanthomonadaceae|Stenotrophomonas|Stenotrophomonas maltophilia group|Stenotrophomonas maltophilia|Stenotrophomonas maltophilia D457	Bacteria	Proteobacteria	Gammaproteobacteria	Xanthomonadales	Xanthomonadaceae	gi|384076029|emb|HE798556.1|	Stenotrophomonas maltophilia D457 complete genome	1163399	938098	939189	1092	100	0	99.91
Pcub_MSU1_v1_03993_0_1_1	1	1047	Acinetobacter calcoaceticus	Bacteria|Proteobacteria|Gammaproteobacteria|Pseudomonadales|Moraxellaceae|Acinetobacter|Acinetobacter calcoaceticus/baumannii complex|Acinetobacter calcoaceticus	Bacteria	Proteobacteria	Gammaproteobacteria	Pseudomonadales	Moraxellaceae	gi|735264997|dbj|LC014682.1|	Acinetobacter calcoaceticus recA gene for recombinase, complete cds, strain: KCTC 2357	471	1	1047	1047	100	0	98.57
Pcub_MSU1_v1_03995_0_0_1	1	3390	Delftia sp. Cs1-4	Bacteria|Proteobacteria|Betaproteobacteria|Burkholderiales|Comamonadaceae|Delftia|Delftia sp. Cs1-4	Bacteria	Proteobacteria	Betaproteobacteria	Burkholderiales	Comamonadaceae	gi|333741867|gb|CP002735.1|	Delftia sp. Cs1-4, complete genome	742013	4359311	4355893	3419	100	0	97.19
[truncated: 4,867 more rows]
